# Supplementary material
Source: publisher figshare collection journal article supplement (https://acs.figshare.com/ndownloader/files/11286047)
Supplement: Supplementary file 1 [file 11286047]

data_1001383
 
_audit_creation_method            SHELXL-2014
_chemical_name_systematic
;
 ?
;
_chemical_name_common             Cyclo-adduct
_chemical_melting_point           ?
_chemical_formula_moiety          'C34 H40 N2 O7'
_chemical_formula_sum
 'C34 H40 N2 O7' 
_chemical_formula_weight          588.68

loop_
 _atom_type_symbol
 _atom_type_description
 _atom_type_scat_dispersion_real
 _atom_type_scat_dispersion_imag
 _atom_type_scat_source
 'C'  'C'   0.0033   0.0016
 'International Tables Vol C Tables 4.2.6.8 and 6.1.1.4'
 'H'  'H'   0.0000   0.0000
 'International Tables Vol C Tables 4.2.6.8 and 6.1.1.4'
 'N'  'N'   0.0061   0.0033
 'International Tables Vol C Tables 4.2.6.8 and 6.1.1.4'
 'O'  'O'   0.0106   0.0060
 'International Tables Vol C Tables 4.2.6.8 and 6.1.1.4'
 
_space_group_crystal_system       monoclinic
_space_group_IT_number            14
_space_group_name_H-M_alt         'P 21/c'
_space_group_name_Hall            '-P 2ybc'
 
_shelx_space_group_comment
;
The symmetry employed for this shelxl refinement is uniquely defined
by the following loop, which should always be used as a source of
symmetry information in preference to the above space-group names.
They are only intended as comments.
;
 
loop_
 _space_group_symop_operation_xyz
 'x, y, z'
 '-x, y+1/2, -z+1/2'
 '-x, -y, -z'
 'x, -y-1/2, z-1/2'
 
_cell_length_a                    9.794(5)
_cell_length_b                    13.608(5)
_cell_length_c                    23.799(5)
_cell_angle_alpha                 90.000(5)
_cell_angle_beta                  95.220(5)
_cell_angle_gamma                 90.000(5)
_cell_volume                      3159(2)
_cell_formula_units_Z             4
_cell_measurement_temperature     298(2)
_cell_measurement_reflns_used     7878 
_cell_measurement_theta_min       2.3 
_cell_measurement_theta_max       28.4 
 
_exptl_crystal_description        'needle' 
_exptl_crystal_colour             'yellow' 
_exptl_crystal_density_meas       1.24 
_exptl_crystal_density_method     'not measured'              
_exptl_crystal_density_diffrn     1.238          
_exptl_crystal_F_000              1256
_exptl_transmission_factor_min    ?                                             
_exptl_transmission_factor_max    ?                                             
_exptl_crystal_size_max           0.280
_exptl_crystal_size_mid           0.220
_exptl_crystal_size_min           0.160
_exptl_absorpt_coefficient_mu     0.086
_shelx_estimated_absorpt_T_min    0.976
_shelx_estimated_absorpt_T_max    0.986
_exptl_absorpt_correction_type    'multi-scan' 
_exptl_absorpt_correction_T_min   0.7029 
_exptl_absorpt_correction_T_max   0.7459 
_exptl_absorpt_process_details    'SADABS' 
 
_exptl_special_details
;
 ?
;
 
_diffrn_ambient_temperature       298(2)
_diffrn_radiation_wavelength      0.71073
_diffrn_radiation_type            MoK\a
_diffrn_source                    'fine-focus sealed tube'                       
_diffrn_measurement_device_type   'Bruker D8 Venture PHOTON 100 CMOS' 
_diffrn_measurement_method        'phi and omega scan' 
_diffrn_detector_area_resol_mean  10.233 
_diffrn_reflns_number             66073
_diffrn_reflns_av_unetI/netI      0.0483
_diffrn_reflns_av_R_equivalents   0.0684
_diffrn_reflns_limit_h_min        -13
_diffrn_reflns_limit_h_max        13
_diffrn_reflns_limit_k_min        -17
_diffrn_reflns_limit_k_max        18
_diffrn_reflns_limit_l_min        -31
_diffrn_reflns_limit_l_max        31
_diffrn_reflns_theta_min          2.279
_diffrn_reflns_theta_max          28.383
_diffrn_reflns_theta_full         25.242
_diffrn_measured_fraction_theta_max   0.996
_diffrn_measured_fraction_theta_full  0.999
_diffrn_reflns_Laue_measured_fraction_max    0.996
_diffrn_reflns_Laue_measured_fraction_full   0.999
_diffrn_reflns_point_group_measured_fraction_max   0.996
_diffrn_reflns_point_group_measured_fraction_full  0.999
_reflns_number_total              7878
_reflns_number_gt                 4227
_reflns_threshold_expression      'I > 2\s(I)'
_reflns_Friedel_coverage          0.000
_reflns_Friedel_fraction_max      .
_reflns_Friedel_fraction_full     .
 
_reflns_special_details
;
 Reflections were merged by SHELXL according to the crystal
 class for the calculation of statistics and refinement.
 
 _reflns_Friedel_fraction is defined as the number of unique
 Friedel pairs measured divided by the number that would be
 possible theoretically, ignoring centric projections and
 systematic absences.
;
 
_computing_data_collection        'APEX2 (Bruker, 2014)'
_computing_cell_refinement        'APEX2 (Bruker, 2014); SAINT (Bruker, 2014)'
_computing_data_reduction         'SAINT (Bruker, 2014);XPREP(Sheldrick,2014)'
_computing_structure_solution     'SHELXS-2014 (Sheldrick, 2014)'
_computing_structure_refinement   'SHELXL-2014 (Sheldrick, 2014)'
_computing_molecular_graphics     'Ortep, mercury'
_computing_publication_material   ?
 
_refine_special_details
;
 ?
;
_refine_ls_structure_factor_coef  Fsqd
_refine_ls_matrix_type            full
_refine_ls_weighting_scheme       calc
_refine_ls_weighting_details
'w=1/[\s^2^(Fo^2^)+(0.0722P)^2^+1.7524P] where P=(Fo^2^+2Fc^2^)/3'
_atom_sites_solution_primary      ?
_atom_sites_solution_secondary    ?
_atom_sites_solution_hydrogens    geom
_refine_ls_hydrogen_treatment     constr
_refine_ls_extinction_method      none
_refine_ls_extinction_coef        .
_refine_ls_number_reflns          7878
_refine_ls_number_parameters      388
_refine_ls_number_restraints      0
_refine_ls_R_factor_all           0.1538
_refine_ls_R_factor_gt            0.0768
_refine_ls_wR_factor_ref          0.2017
_refine_ls_wR_factor_gt           0.1654
_refine_ls_goodness_of_fit_ref    1.049
_refine_ls_restrained_S_all       1.049
_refine_ls_shift/su_max           0.000
_refine_ls_shift/su_mean          0.000
 
loop_
 _atom_site_label
 _atom_site_type_symbol
 _atom_site_fract_x
 _atom_site_fract_y
 _atom_site_fract_z
 _atom_site_U_iso_or_equiv
 _atom_site_adp_type
 _atom_site_occupancy
 _atom_site_site_symmetry_order  
 _atom_site_calc_flag
 _atom_site_refinement_flags_posn
 _atom_site_refinement_flags_adp
 _atom_site_refinement_flags_occupancy
 _atom_site_disorder_assembly
 _atom_site_disorder_group
N2 N 0.59883(19) 0.37216(13) 0.67618(8) 0.0432(5) Uani 1 1 d . . . . .
O1 O 0.8504(2) -0.05941(13) 0.65994(9) 0.0718(6) Uani 1 1 d . . . . .
O5 O 0.6971(2) 0.63708(13) 0.59116(8) 0.0711(6) Uani 1 1 d . . . . .
O2 O 0.7094(2) 0.03995(14) 0.58203(9) 0.0780(6) Uani 1 1 d . . . . .
O6 O 0.8856(2) 0.61036(15) 0.64895(9) 0.0783(6) Uani 1 1 d . . . . .
N1 N 0.5004(2) 0.34742(15) 0.71398(9) 0.0496(5) Uani 1 1 d . . . . .
C20 C 0.7403(2) 0.34313(16) 0.69573(10) 0.0436(5) Uani 1 1 d . . . . .
H20 H 0.7609 0.3629 0.7352 0.052 Uiso 1 1 calc R U . . .
C11 C 0.5981(3) 0.47436(16) 0.65718(10) 0.0471(6) Uani 1 1 d . . . . .
H11 H 0.5169 0.4856 0.6307 0.057 Uiso 1 1 calc R U . . .
C21 C 0.7623(2) 0.23407(16) 0.69022(10) 0.0421(5) Uani 1 1 d . . . . .
O3 O 0.5909(3) 0.4007(2) 0.54683(9) 0.0991(8) Uani 1 1 d . . . . .
C22 C 0.7171(2) 0.18729(17) 0.63971(10) 0.0473(6) Uani 1 1 d . . . . .
H22 H 0.6659 0.2224 0.6116 0.057 Uiso 1 1 calc R U . . .
C24 C 0.8232(2) 0.03670(17) 0.67311(11) 0.0503(6) Uani 1 1 d . . . . .
C26 C 0.8334(2) 0.17999(17) 0.73170(10) 0.0467(6) Uani 1 1 d . . . . .
H26 H 0.8616 0.2095 0.7660 0.056 Uiso 1 1 calc R U . . .
C25 C 0.8642(2) 0.08149(18) 0.72326(11) 0.0506(6) Uani 1 1 d . . . . .
H25 H 0.9128 0.0460 0.7519 0.061 Uiso 1 1 calc R U . . .
O4 O 0.7968(3) 0.4590(2) 0.53397(10) 0.1166(11) Uani 1 1 d . . . . .
C12 C 0.7267(3) 0.47726(17) 0.62483(10) 0.0498(6) Uani 1 1 d . . . . .
C13 C 0.7832(3) 0.58120(19) 0.62333(11) 0.0551(7) Uani 1 1 d . . . . .
C19 C 0.8264(3) 0.40542(18) 0.65776(12) 0.0580(7) Uani 1 1 d . . . . .
H19A H 0.8967 0.4415 0.6806 0.070 Uiso 1 1 calc R U . . .
H19B H 0.8705 0.3635 0.6318 0.070 Uiso 1 1 calc R U . . .
C10 C 0.5976(3) 0.54704(18) 0.70568(11) 0.0544(6) Uani 1 1 d . . . . .
H10A H 0.6827 0.5422 0.7298 0.065 Uiso 1 1 calc R U . . .
H10B H 0.5891 0.6136 0.6912 0.065 Uiso 1 1 calc R U . . .
C29 C 0.3820(2) 0.30092(18) 0.68808(12) 0.0512(6) Uani 1 1 d . . . . .
O7 O 0.8767(4) 0.3202(3) 0.94280(12) 0.1241(10) Uani 1 1 d . . . . .
C5 C 0.5896(3) 0.39734(19) 0.81049(11) 0.0564(7) Uani 1 1 d . . . . .
C30 C 0.3604(3) 0.2884(2) 0.63036(13) 0.0650(8) Uani 1 1 d . . . . .
H30 H 0.4241 0.3120 0.6070 0.078 Uiso 1 1 calc R U . . .
C23 C 0.7470(3) 0.08989(17) 0.63079(11) 0.0508(6) Uani 1 1 d . . . . .
C9 C 0.4770(3) 0.5229(2) 0.73911(12) 0.0629(7) Uani 1 1 d . . . . .
H9A H 0.3923 0.5324 0.7153 0.076 Uiso 1 1 calc R U . . .
H9B H 0.4767 0.5677 0.7708 0.076 Uiso 1 1 calc R U . . .
C8 C 0.4836(3) 0.41756(19) 0.76078(11) 0.0574(7) Uani 1 1 d . . . . .
H8 H 0.3939 0.4035 0.7741 0.069 Uiso 1 1 calc R U . . .
C6 C 0.6265(3) 0.3010(2) 0.82401(12) 0.0682(8) Uani 1 1 d . . . . .
H6 H 0.5863 0.2503 0.8021 0.082 Uiso 1 1 calc R U . . .
C34 C 0.2862(3) 0.2613(2) 0.72171(14) 0.0673(8) Uani 1 1 d . . . . .
H34 H 0.3003 0.2672 0.7607 0.081 Uiso 1 1 calc R U . . .
C28 C 0.9537(3) -0.1084(2) 0.69451(15) 0.0777(9) Uani 1 1 d . . . . .
H28A H 0.9630 -0.1744 0.6811 0.117 Uiso 1 1 calc R U . . .
H28B H 1.0391 -0.0743 0.6933 0.117 Uiso 1 1 calc R U . . .
H28C H 0.9291 -0.1099 0.7326 0.117 Uiso 1 1 calc R U . . .
C16 C 0.6933(4) 0.4411(2) 0.56443(12) 0.0706(9) Uani 1 1 d . . . . .
C33 C 0.1718(3) 0.2141(2) 0.6981(2) 0.0869(11) Uani 1 1 d . . . . .
H33 H 0.1096 0.1882 0.7214 0.104 Uiso 1 1 calc R U . . .
C4 C 0.6497(4) 0.4698(2) 0.84418(13) 0.0736(9) Uani 1 1 d . . . . .
H4 H 0.6262 0.5350 0.8368 0.088 Uiso 1 1 calc R U . . .
C31 C 0.2430(3) 0.2405(3) 0.60741(16) 0.0851(10) Uani 1 1 d . . . . .
H31 H 0.2285 0.2324 0.5685 0.102 Uiso 1 1 calc R U . . .
C3 C 0.7454(4) 0.4477(3) 0.88933(14) 0.0859(10) Uani 1 1 d . . . . .
H3 H 0.7857 0.4978 0.9116 0.103 Uiso 1 1 calc R U . . .
C14 C 0.7319(4) 0.7407(2) 0.58672(16) 0.0961(12) Uani 1 1 d . . . . .
H14A H 0.8186 0.7478 0.5704 0.115 Uiso 1 1 calc R U . . .
H14B H 0.7403 0.7709 0.6238 0.115 Uiso 1 1 calc R U . . .
C7 C 0.7194(4) 0.2782(3) 0.86822(14) 0.0824(10) Uani 1 1 d . . . . .
H7 H 0.7414 0.2129 0.8762 0.099 Uiso 1 1 calc R U . . .
C2 C 0.7799(4) 0.3511(3) 0.90074(13) 0.0830(10) Uani 1 1 d . . . . .
C27 C 0.6228(4) 0.0907(3) 0.54087(14) 0.0959(12) Uani 1 1 d . . . . .
H27A H 0.6028 0.0493 0.5085 0.144 Uiso 1 1 calc R U . . .
H27B H 0.5389 0.1081 0.5564 0.144 Uiso 1 1 calc R U . . .
H27C H 0.6679 0.1493 0.5298 0.144 Uiso 1 1 calc R U . . .
C32 C 0.1474(3) 0.2045(3) 0.6416(2) 0.0943(12) Uani 1 1 d . . . . .
H32 H 0.0677 0.1743 0.6259 0.113 Uiso 1 1 calc R U . . .
C15 C 0.6217(5) 0.7877(3) 0.55055(18) 0.1158(15) Uani 1 1 d . . . . .
H15A H 0.6418 0.8564 0.5468 0.174 Uiso 1 1 calc R U . . .
H15B H 0.6145 0.7574 0.5140 0.174 Uiso 1 1 calc R U . . .
H15C H 0.5366 0.7804 0.5672 0.174 Uiso 1 1 calc R U . . .
C1 C 0.9538(6) 0.3908(4) 0.9715(2) 0.145(2) Uani 1 1 d . . . . .
H1A H 1.0169 0.3602 0.9994 0.218 Uiso 1 1 calc R U . . .
H1B H 1.0040 0.4271 0.9455 0.218 Uiso 1 1 calc R U . . .
H1C H 0.8948 0.4346 0.9896 0.218 Uiso 1 1 calc R U . . .
C17 C 0.7764(8) 0.4319(5) 0.4745(2) 0.214(4) Uani 1 1 d . . . . .
H17A H 0.8166 0.3676 0.4700 0.257 Uiso 1 1 calc R U . . .
H17B H 0.6787 0.4261 0.4641 0.257 Uiso 1 1 calc R U . . .
C18 C 0.8249(9) 0.4892(5) 0.4408(2) 0.185(3) Uani 1 1 d . . . . .
H18A H 0.8059 0.4647 0.4031 0.278 Uiso 1 1 calc R U . . .
H18B H 0.7839 0.5529 0.4437 0.278 Uiso 1 1 calc R U . . .
H18C H 0.9222 0.4942 0.4496 0.278 Uiso 1 1 calc R U . . .
 
loop_
 _atom_site_aniso_label
 _atom_site_aniso_U_11
 _atom_site_aniso_U_22
 _atom_site_aniso_U_33
 _atom_site_aniso_U_23
 _atom_site_aniso_U_13
 _atom_site_aniso_U_12
N2 0.0363(11) 0.0392(10) 0.0551(12) 0.0015(8) 0.0095(9) -0.0020(8)
O1 0.0717(13) 0.0439(10) 0.0959(15) -0.0021(10) -0.0144(11) 0.0135(9)
O5 0.0988(16) 0.0446(10) 0.0671(12) 0.0096(9) -0.0079(11) -0.0171(10)
O2 0.1032(17) 0.0539(12) 0.0717(13) -0.0141(10) -0.0203(12) 0.0162(11)
O6 0.0835(15) 0.0579(12) 0.0902(15) 0.0037(10) -0.0094(12) -0.0279(11)
N1 0.0386(11) 0.0523(12) 0.0593(13) -0.0008(10) 0.0128(10) -0.0036(9)
C20 0.0361(13) 0.0409(12) 0.0546(14) -0.0041(10) 0.0080(10) -0.0046(9)
C11 0.0465(14) 0.0398(13) 0.0549(14) 0.0020(10) 0.0031(11) 0.0004(10)
C21 0.0319(12) 0.0414(13) 0.0537(14) 0.0030(10) 0.0081(10) -0.0041(9)
O3 0.119(2) 0.1135(19) 0.0645(14) -0.0198(13) 0.0076(13) -0.0593(17)
C22 0.0466(14) 0.0424(13) 0.0523(14) 0.0047(11) 0.0004(11) 0.0016(10)
C24 0.0412(13) 0.0384(13) 0.0712(17) 0.0039(12) 0.0043(12) 0.0003(10)
C26 0.0381(13) 0.0502(14) 0.0515(14) 0.0011(11) 0.0020(11) -0.0060(10)
C25 0.0384(13) 0.0496(14) 0.0627(16) 0.0125(12) -0.0008(12) 0.0012(11)
O4 0.158(3) 0.116(2) 0.0864(16) -0.0493(14) 0.0683(17) -0.0729(18)
C12 0.0565(15) 0.0395(13) 0.0543(14) -0.0030(11) 0.0094(12) -0.0114(11)
C13 0.0688(18) 0.0478(15) 0.0492(14) 0.0017(12) 0.0071(13) -0.0122(13)
C19 0.0475(15) 0.0449(14) 0.0839(19) 0.0040(13) 0.0181(14) -0.0066(11)
C10 0.0635(17) 0.0401(13) 0.0603(16) 0.0000(11) 0.0097(13) 0.0070(11)
C29 0.0366(13) 0.0427(13) 0.0750(18) 0.0054(12) 0.0090(12) 0.0020(10)
O7 0.151(3) 0.132(2) 0.0828(18) 0.0077(17) -0.0261(18) 0.000(2)
C5 0.0606(17) 0.0578(16) 0.0533(15) 0.0019(12) 0.0195(13) -0.0059(13)
C30 0.0523(17) 0.0622(17) 0.080(2) 0.0006(14) 0.0021(15) -0.0125(13)
C23 0.0509(15) 0.0427(14) 0.0574(15) -0.0035(11) -0.0023(12) 0.0007(11)
C9 0.0651(18) 0.0585(17) 0.0669(18) -0.0035(13) 0.0149(14) 0.0151(13)
C8 0.0523(16) 0.0595(16) 0.0635(17) -0.0046(13) 0.0226(13) 0.0001(12)
C6 0.087(2) 0.0604(18) 0.0589(17) 0.0094(14) 0.0148(16) -0.0118(15)
C34 0.0476(16) 0.0626(17) 0.095(2) 0.0083(15) 0.0224(15) -0.0023(13)
C28 0.067(2) 0.0614(18) 0.103(2) 0.0103(17) -0.0019(18) 0.0210(15)
C16 0.099(2) 0.0548(17) 0.0614(17) -0.0101(13) 0.0236(17) -0.0286(16)
C33 0.0474(19) 0.074(2) 0.142(4) -0.002(2) 0.026(2) -0.0154(15)
C4 0.093(2) 0.0628(19) 0.0660(19) -0.0014(15) 0.0122(18) -0.0033(16)
C31 0.063(2) 0.086(2) 0.103(3) -0.0105(19) -0.0084(19) -0.0194(17)
C3 0.106(3) 0.082(2) 0.068(2) -0.0078(17) -0.001(2) -0.013(2)
C14 0.138(3) 0.0468(18) 0.100(3) 0.0187(17) -0.007(2) -0.0227(19)
C7 0.113(3) 0.071(2) 0.0637(19) 0.0166(16) 0.0085(19) -0.0049(19)
C2 0.098(3) 0.094(3) 0.0565(19) 0.0183(18) 0.0042(18) 0.000(2)
C27 0.127(3) 0.080(2) 0.072(2) -0.0151(18) -0.035(2) 0.016(2)
C32 0.0451(19) 0.080(2) 0.157(4) -0.012(2) 0.000(2) -0.0176(16)
C15 0.155(4) 0.066(2) 0.123(3) 0.027(2) -0.001(3) 0.006(2)
C1 0.177(5) 0.162(5) 0.091(3) -0.018(3) -0.016(3) 0.016(4)
C17 0.344(9) 0.227(7) 0.090(3) -0.089(4) 0.124(5) -0.177(7)
C18 0.311(9) 0.158(5) 0.079(3) 0.007(3) -0.017(4) -0.069(6)
 
_geom_special_details
;
 All esds (except the esd in the dihedral angle between two l.s. planes)
 are estimated using the full covariance matrix.  The cell esds are taken
 into account individually in the estimation of esds in distances, angles
 and torsion angles; correlations between esds in cell parameters are only
 used when they are defined by crystal symmetry.  An approximate (isotropic)
 treatment of cell esds is used for estimating esds involving l.s. planes.
;
 
loop_
 _geom_bond_atom_site_label_1
 _geom_bond_atom_site_label_2
 _geom_bond_distance
 _geom_bond_site_symmetry_2
 _geom_bond_publ_flag
N2 N1 1.417(3) . ?
N2 C11 1.462(3) . ?
N2 C20 1.475(3) . ?
O1 C24 1.377(3) . ?
O1 C28 1.412(3) . ?
O5 C13 1.326(3) . ?
O5 C14 1.457(3) . ?
O2 C23 1.366(3) . ?
O2 C27 1.416(4) . ?
O6 C13 1.194(3) . ?
N1 C29 1.412(3) . ?
N1 C8 1.487(3) . ?
C20 C21 1.507(3) . ?
C20 C19 1.544(3) . ?
C11 C10 1.520(3) . ?
C11 C12 1.536(3) . ?
C21 C26 1.370(3) . ?
C21 C22 1.396(3) . ?
O3 C16 1.186(4) . ?
C22 C23 1.378(3) . ?
C24 C25 1.367(4) . ?
C24 C23 1.399(4) . ?
C26 C25 1.392(3) . ?
O4 C16 1.322(4) . ?
O4 C17 1.459(5) . ?
C12 C13 1.520(3) . ?
C12 C16 1.526(4) . ?
C12 C19 1.544(4) . ?
C10 C9 1.519(4) . ?
C29 C30 1.381(4) . ?
C29 C34 1.396(4) . ?
O7 C1 1.366(6) . ?
O7 C2 1.380(4) . ?
C5 C4 1.369(4) . ?
C5 C6 1.390(4) . ?
C5 C8 1.526(4) . ?
C30 C31 1.390(4) . ?
C9 C8 1.523(4) . ?
C6 C7 1.363(4) . ?
C34 C33 1.367(4) . ?
C33 C32 1.352(5) . ?
C4 C3 1.393(5) . ?
C31 C32 1.384(5) . ?
C3 C2 1.378(5) . ?
C14 C15 1.466(5) . ?
C7 C2 1.360(5) . ?
C17 C18 1.243(6) . ?
 
loop_
 _geom_angle_atom_site_label_1
 _geom_angle_atom_site_label_2
 _geom_angle_atom_site_label_3
 _geom_angle
 _geom_angle_site_symmetry_1
 _geom_angle_site_symmetry_3
 _geom_angle_publ_flag
N1 N2 C11 115.95(18) . . ?
N1 N2 C20 114.19(18) . . ?
C11 N2 C20 109.31(17) . . ?
C24 O1 C28 117.4(2) . . ?
C13 O5 C14 117.1(2) . . ?
C23 O2 C27 116.3(2) . . ?
C29 N1 N2 114.1(2) . . ?
C29 N1 C8 118.2(2) . . ?
N2 N1 C8 116.80(18) . . ?
N2 C20 C21 111.96(18) . . ?
N2 C20 C19 102.46(19) . . ?
C21 C20 C19 113.6(2) . . ?
N2 C11 C10 112.6(2) . . ?
N2 C11 C12 101.43(18) . . ?
C10 C11 C12 115.0(2) . . ?
C26 C21 C22 118.4(2) . . ?
C26 C21 C20 122.3(2) . . ?
C22 C21 C20 119.2(2) . . ?
C23 C22 C21 121.1(2) . . ?
C25 C24 O1 125.1(2) . . ?
C25 C24 C23 119.5(2) . . ?
O1 C24 C23 115.4(2) . . ?
C21 C26 C25 121.1(2) . . ?
C24 C25 C26 120.3(2) . . ?
C16 O4 C17 116.2(3) . . ?
C13 C12 C16 109.0(2) . . ?
C13 C12 C11 110.6(2) . . ?
C16 C12 C11 110.4(2) . . ?
C13 C12 C19 112.7(2) . . ?
C16 C12 C19 110.2(2) . . ?
C11 C12 C19 103.83(19) . . ?
O6 C13 O5 124.4(2) . . ?
O6 C13 C12 126.0(3) . . ?
O5 C13 C12 109.5(2) . . ?
C12 C19 C20 106.9(2) . . ?
C9 C10 C11 108.3(2) . . ?
C30 C29 C34 118.2(3) . . ?
C30 C29 N1 122.3(2) . . ?
C34 C29 N1 119.4(3) . . ?
C1 O7 C2 117.4(4) . . ?
C4 C5 C6 117.0(3) . . ?
C4 C5 C8 123.4(3) . . ?
C6 C5 C8 119.6(3) . . ?
C29 C30 C31 119.7(3) . . ?
O2 C23 C22 124.4(2) . . ?
O2 C23 C24 116.0(2) . . ?
C22 C23 C24 119.6(2) . . ?
C10 C9 C8 111.7(2) . . ?
N1 C8 C9 110.8(2) . . ?
N1 C8 C5 110.6(2) . . ?
C9 C8 C5 115.9(2) . . ?
C7 C6 C5 122.3(3) . . ?
C33 C34 C29 121.0(3) . . ?
O3 C16 O4 123.9(3) . . ?
O3 C16 C12 125.7(3) . . ?
O4 C16 C12 110.3(3) . . ?
C32 C33 C34 121.2(3) . . ?
C5 C4 C3 121.3(3) . . ?
C32 C31 C30 121.0(4) . . ?
C2 C3 C4 119.5(3) . . ?
O5 C14 C15 107.5(3) . . ?
C2 C7 C6 119.9(3) . . ?
C7 C2 C3 119.8(3) . . ?
C7 C2 O7 115.2(3) . . ?
C3 C2 O7 125.0(4) . . ?
C33 C32 C31 118.9(3) . . ?
C18 C17 O4 116.2(5) . . ?
 
_refine_diff_density_max    0.278
_refine_diff_density_min   -0.369
_refine_diff_density_rms    0.049

_shelxl_version_number 2014-3

_shelx_res_file
;
TITL PB_RD_10_01_383_0m in P2(1)/c
CELL  0.71073   9.7940  13.6080  23.7990   90.000   95.220   90.000
ZERR     4.00   0.0050   0.0050   0.0050    0.005    0.005    0.005
LATT   1
SYMM  - X, 1/2 + Y, 1/2 - Z
SFAC  C    H    N    O
UNIT  136  160  8    28
MERG   2
FMAP   2
PLAN   25
SIZE     0.160   0.220   0.280
ACTA
L.S.  10
TEMP    25.00
WGHT    0.072200    1.752400
FVAR       0.08698
N2    3    0.598834    0.372164    0.676184    11.00000    0.03635    0.03915 =
         0.05512    0.00152    0.00952   -0.00203
O1    4    0.850388   -0.059411    0.659937    11.00000    0.07165    0.04390 =
         0.09594   -0.00211   -0.01444    0.01349
O5    4    0.697068    0.637078    0.591162    11.00000    0.09879    0.04456 =
         0.06712    0.00962   -0.00790   -0.01714
O2    4    0.709411    0.039955    0.582030    11.00000    0.10318    0.05393 =
         0.07175   -0.01409   -0.02033    0.01624
O6    4    0.885631    0.610364    0.648955    11.00000    0.08354    0.05785 =
         0.09023    0.00370   -0.00937   -0.02791
N1    3    0.500448    0.347424    0.713978    11.00000    0.03862    0.05231 =
         0.05929   -0.00080    0.01283   -0.00363
C20   1    0.740318    0.343129    0.695726    11.00000    0.03612    0.04086 =
         0.05462   -0.00408    0.00805   -0.00459
AFIX  13
H20   2    0.760934    0.362861    0.735188    11.00000   -1.20000
AFIX   0
C11   1    0.598053    0.474357    0.657177    11.00000    0.04649    0.03981 =
         0.05485    0.00204    0.00307    0.00037
AFIX  13
H11   2    0.516912    0.485587    0.630716    11.00000   -1.20000
AFIX   0
C21   1    0.762287    0.234074    0.690223    11.00000    0.03192    0.04137 =
         0.05368    0.00301    0.00808   -0.00414
O3    4    0.590902    0.400734    0.546831    11.00000    0.11914    0.11354 =
         0.06449   -0.01977    0.00756   -0.05934
C22   1    0.717061    0.187287    0.639711    11.00000    0.04662    0.04239 =
         0.05225    0.00468    0.00043    0.00160
AFIX  43
H22   2    0.665898    0.222413    0.611642    11.00000   -1.20000
AFIX   0
C24   1    0.823154    0.036699    0.673111    11.00000    0.04120    0.03845 =
         0.07120    0.00392    0.00435    0.00028
C26   1    0.833397    0.179993    0.731697    11.00000    0.03812    0.05023 =
         0.05152    0.00111    0.00200   -0.00597
AFIX  43
H26   2    0.861588    0.209531    0.766043    11.00000   -1.20000
AFIX   0
C25   1    0.864156    0.081490    0.723257    11.00000    0.03845    0.04965 =
         0.06267    0.01255   -0.00076    0.00125
AFIX  43
H25   2    0.912819    0.045992    0.751862    11.00000   -1.20000
AFIX   0
O4    4    0.796824    0.458993    0.533971    11.00000    0.15819    0.11584 =
         0.08636   -0.04926    0.06833   -0.07293
C12   1    0.726718    0.477265    0.624827    11.00000    0.05652    0.03950 =
         0.05426   -0.00299    0.00941   -0.01139
C13   1    0.783181    0.581199    0.623330    11.00000    0.06877    0.04780 =
         0.04916    0.00171    0.00712   -0.01217
C19   1    0.826410    0.405422    0.657755    11.00000    0.04750    0.04489 =
         0.08392    0.00395    0.01813   -0.00658
AFIX  23
H19A  2    0.896688    0.441466    0.680559    11.00000   -1.20000
H19B  2    0.870534    0.363493    0.631850    11.00000   -1.20000
AFIX   0
C10   1    0.597606    0.547041    0.705676    11.00000    0.06352    0.04014 =
         0.06026    0.00004    0.00971    0.00697
AFIX  23
H10A  2    0.682703    0.542176    0.729772    11.00000   -1.20000
H10B  2    0.589115    0.613575    0.691152    11.00000   -1.20000
AFIX   0
C29   1    0.382046    0.300924    0.688076    11.00000    0.03657    0.04272 =
         0.07499    0.00538    0.00902    0.00196
O7    4    0.876660    0.320172    0.942800    11.00000    0.15053    0.13215 =
         0.08277    0.00769   -0.02613   -0.00020
C5    1    0.589611    0.397341    0.810485    11.00000    0.06057    0.05779 =
         0.05333    0.00193    0.01954   -0.00591
C30   1    0.360439    0.288418    0.630364    11.00000    0.05228    0.06220 =
         0.07968    0.00059    0.00207   -0.01251
AFIX  43
H30   2    0.424132    0.311963    0.606972    11.00000   -1.20000
AFIX   0
C23   1    0.747029    0.089895    0.630787    11.00000    0.05089    0.04270 =
         0.05741   -0.00346   -0.00232    0.00069
C9    1    0.477037    0.522938    0.739108    11.00000    0.06510    0.05846 =
         0.06686   -0.00350    0.01488    0.01514
AFIX  23
H9A   2    0.392289    0.532380    0.715301    11.00000   -1.20000
H9B   2    0.476690    0.567668    0.770830    11.00000   -1.20000
AFIX   0
C8    1    0.483641    0.417556    0.760785    11.00000    0.05230    0.05954 =
         0.06346   -0.00461    0.02264    0.00009
AFIX  13
H8    2    0.393882    0.403540    0.774105    11.00000   -1.20000
AFIX   0
C6    1    0.626482    0.301007    0.824009    11.00000    0.08695    0.06037 =
         0.05891    0.00936    0.01484   -0.01181
AFIX  43
H6    2    0.586333    0.250310    0.802110    11.00000   -1.20000
AFIX   0
C34   1    0.286162    0.261339    0.721706    11.00000    0.04760    0.06262 =
         0.09455    0.00825    0.02239   -0.00234
AFIX  43
H34   2    0.300341    0.267174    0.760736    11.00000   -1.20000
AFIX   0
C28   1    0.953666   -0.108427    0.694508    11.00000    0.06702    0.06145 =
         0.10299    0.01026   -0.00187    0.02097
AFIX  33
H28A  2    0.962983   -0.174425    0.681127    11.00000   -1.50000
H28B  2    1.039094   -0.074263    0.693256    11.00000   -1.50000
H28C  2    0.929141   -0.109920    0.732646    11.00000   -1.50000
AFIX   0
C16   1    0.693260    0.441139    0.564427    11.00000    0.09858    0.05483 =
         0.06137   -0.01013    0.02363   -0.02861
C33   1    0.171770    0.214140    0.698128    11.00000    0.04735    0.07437 =
         0.14207   -0.00175    0.02624   -0.01535
AFIX  43
H33   2    0.109572    0.188152    0.721421    11.00000   -1.20000
AFIX   0
C4    1    0.649713    0.469769    0.844175    11.00000    0.09293    0.06284 =
         0.06600   -0.00138    0.01224   -0.00327
AFIX  43
H4    2    0.626173    0.535001    0.836755    11.00000   -1.20000
AFIX   0
C31   1    0.243011    0.240461    0.607408    11.00000    0.06311    0.08621 =
         0.10318   -0.01046   -0.00836   -0.01943
AFIX  43
H31   2    0.228502    0.232397    0.568519    11.00000   -1.20000
AFIX   0
C3    1    0.745389    0.447718    0.889332    11.00000    0.10605    0.08215 =
         0.06791   -0.00778   -0.00088   -0.01288
AFIX  43
H3    2    0.785724    0.497842    0.911636    11.00000   -1.20000
AFIX   0
C14   1    0.731950    0.740669    0.586718    11.00000    0.13814    0.04682 =
         0.09997    0.01867   -0.00709   -0.02273
AFIX  23
H14A  2    0.818605    0.747804    0.570382    11.00000   -1.20000
H14B  2    0.740329    0.770909    0.623780    11.00000   -1.20000
AFIX   0
C7    1    0.719382    0.278196    0.868220    11.00000    0.11300    0.07062 =
         0.06374    0.01655    0.00849   -0.00486
AFIX  43
H7    2    0.741391    0.212872    0.876152    11.00000   -1.20000
AFIX   0
C2    1    0.779888    0.351089    0.900738    11.00000    0.09825    0.09386 =
         0.05652    0.01829    0.00417    0.00044
C27   1    0.622782    0.090744    0.540871    11.00000    0.12747    0.08028 =
         0.07196   -0.01505   -0.03488    0.01571
AFIX  33
H27A  2    0.602766    0.049274    0.508537    11.00000   -1.50000
H27B  2    0.538934    0.108070    0.556391    11.00000   -1.50000
H27C  2    0.667927    0.149316    0.529785    11.00000   -1.50000
AFIX   0
C32   1    0.147387    0.204544    0.641558    11.00000    0.04513    0.07953 =
         0.15661   -0.01200    0.00034   -0.01761
AFIX  43
H32   2    0.067695    0.174314    0.625862    11.00000   -1.20000
AFIX   0
C15   1    0.621705    0.787742    0.550547    11.00000    0.15530    0.06638 =
         0.12322    0.02651   -0.00070    0.00605
AFIX  33
H15A  2    0.641811    0.856350    0.546792    11.00000   -1.50000
H15B  2    0.614516    0.757352    0.513994    11.00000   -1.50000
H15C  2    0.536576    0.780358    0.567163    11.00000   -1.50000
AFIX   0
C1    1    0.953843    0.390778    0.971468    11.00000    0.17673    0.16178 =
         0.09149   -0.01848   -0.01596    0.01629
AFIX  33
H1A   2    1.016901    0.360237    0.999409    11.00000   -1.50000
H1B   2    1.004022    0.427087    0.945540    11.00000   -1.50000
H1C   2    0.894842    0.434628    0.989601    11.00000   -1.50000
AFIX   0
C17   1    0.776418    0.431943    0.474494    11.00000    0.34447    0.22662 =
         0.08969   -0.08868    0.12398   -0.17698
AFIX  23
H17A  2    0.816581    0.367572    0.470034    11.00000   -1.20000
H17B  2    0.678671    0.426085    0.464107    11.00000   -1.20000
AFIX   0
C18   1    0.824871    0.489192    0.440790    11.00000    0.31076    0.15842 =
         0.07941    0.00689   -0.01749   -0.06923
AFIX  33
H18A  2    0.805875    0.464715    0.403057    11.00000   -1.50000
H18B  2    0.783930    0.552881    0.443669    11.00000   -1.50000
H18C  2    0.922234    0.494201    0.449612    11.00000   -1.50000
AFIX   0
HKLF    4

REM  PB_RD_10_01_383_0m in P2(1)/c
REM R1 =  0.0768 for    4227 Fo > 4sig(Fo)  and  0.1538 for all    7878 data
REM    388 parameters refined using      0 restraints

END

WGHT      0.0722      1.7524

REM Highest difference peak  0.278,  deepest hole -0.369,  1-sigma level  0.049
Q1    1   0.9061  0.2720  0.9827  11.00000  0.05    0.28
Q2    1   0.8949  0.4313  0.4565  11.00000  0.05    0.26
Q3    1   0.8475  0.4196  0.4910  11.00000  0.05    0.23
Q4    1   0.8367  0.3897  0.9640  11.00000  0.05    0.22
Q5    1   0.8720  0.4591  0.5452  11.00000  0.05    0.22
Q6    1   0.8839  0.5464  0.4455  11.00000  0.05    0.20
Q7    1   0.7324  0.4745  0.4547  11.00000  0.05    0.19
Q8    1   0.7277  0.3608  0.4688  11.00000  0.05    0.18
Q9    1   0.7669  0.4811  0.5222  11.00000  0.05    0.18
Q10   1   1.0270 -0.0570  0.7204  11.00000  0.05    0.15
Q11   1   0.3890  0.3260  0.6088  11.00000  0.05    0.14
Q12   1   0.8377  0.4826  0.4192  11.00000  0.05    0.14
Q13   1   1.0221 -0.1572  0.6607  11.00000  0.05    0.14
Q14   1  -0.0469  0.2162  0.5699  11.00000  0.05    0.14
Q15   1   0.4764  0.0673  0.5777  11.00000  0.05    0.13
Q16   1   0.7459  0.4016  0.9183  11.00000  0.05    0.13
Q17   1   0.5924  0.8361  0.6396  11.00000  0.05    0.13
Q18   1   0.8900  0.0591  0.7868  11.00000  0.05    0.13
Q19   1   0.5848  0.2346  0.8845  11.00000  0.05    0.13
Q20   1   1.0059  0.5146  0.6488  11.00000  0.05    0.13
Q21   1   0.5062  0.4658  0.6021  11.00000  0.05    0.12
Q22   1   0.5492  0.2213  0.6885  11.00000  0.05    0.12
Q23   1   0.4117  0.5030  0.6223  11.00000  0.05    0.12
Q24   1   0.5395  0.7883  0.6202  11.00000  0.05    0.12
Q25   1   0.5608  0.6499  0.6591  11.00000  0.05    0.12
;
_shelx_res_checksum   46869

_shelx_hkl_file
;
  -2   0   0  399.70    8.82
   2   0   0  407.89    8.84
   2   0   0  409.42    8.85
  -2   0   0  354.04    8.89
   3   0   0   15.46    0.39
  -3   0   0   15.51    0.39
   3   0   0   15.85    0.39
  -3   0   0   15.36    0.39
  -4   0   0    3.73    0.14
  -4   0   0    3.73    0.14
   4   0   0    3.88    0.14
   4   0   0    3.79    0.14
   5   0   0    1.44    0.11
  -5   0   0    1.53    0.10
   5   0   0    1.46    0.10
  -5   0   0    1.51    0.10
   6   0   0    2.39    0.14
  -6   0   0    2.45    0.15
   6   0   0    2.52    0.16
  -6   0   0    2.02    0.14
  -7   0   0    5.27    0.23
   7   0   0    5.42    0.24
   7   0   0    5.62    0.24
  -7   0   0    5.68    0.24
   8   0   0    8.77    0.33
  -8   0   0    8.82    0.33
  -8   0   0    9.21    0.33
   8   0   0    9.31    0.34
  -9   0   0   12.31    0.45
  -9   0   0   13.69    0.49
   9   0   0   13.85    0.50
   9   0   0   12.80    0.46
  10   0   0    0.07    0.15
 -10   0   0    0.43    0.19
 -10   0   0    0.05    0.17
  10   0   0    0.21    0.17
  11   0   0    0.25    0.24
 -11   0   0    0.27    0.21
 -12   0   0    0.62    0.26
  12   0   0    0.30    0.26
  13   0   0   -0.10    0.34
   1  -1   0   23.49    0.53
   1  -1   0   23.90    0.53
  -1  -1   0   23.82    0.53
  -1  -1   0   23.14    0.53
  -1   1   0   23.24    0.53
   1   1   0   23.54    0.53
  -1   1   0   24.22    0.53
   1   1   0   23.08    0.54
   2  -1   0    0.05    0.03
  -2  -1   0    0.05    0.02
  -2  -1   0    0.03    0.02
  -2   1   0    0.07    0.02
  -2   1   0    0.10    0.03
   2   1   0    0.08    0.02
   2   1   0    0.11    0.03
  -3  -1   0    3.48    0.12
  -3  -1   0    3.55    0.12
   3  -1   0    3.54    0.12
   3  -1   0    3.72    0.12
  -3   1   0    3.39    0.12
   3   1   0    3.55    0.12
   3   1   0    3.45    0.12
  -3   1   0    3.59    0.12
   4  -1   0    6.55    0.20
  -4  -1   0    6.39    0.20
   4  -1   0    6.50    0.20
  -4  -1   0    6.51    0.20
  -4   1   0    6.70    0.21
   4   1   0    6.43    0.20
  -4   1   0    6.61    0.20
   4   1   0    6.17    0.20
  -5  -1   0    5.02    0.18
  -5  -1   0    5.12    0.18
   5  -1   0    4.64    0.18
   5  -1   0    4.98    0.18
  -5   1   0    4.96    0.19
   5   1   0    5.16    0.18
   5   1   0    4.99    0.19
  -5   1   0    5.00    0.19
  -6  -1   0   -0.05    0.06
   6  -1   0   -0.10    0.07
  -6  -1   0    0.02    0.08
   6  -1   0    0.05    0.07
   6   1   0    0.00    0.06
  -6   1   0   -0.05    0.06
   6   1   0   -0.06    0.06
  -6   1   0   -0.05    0.06
  -7  -1   0    1.57    0.16
   7  -1   0    1.80    0.16
  -7  -1   0    1.81    0.17
   7  -1   0    2.05    0.17
  -7   1   0    1.80    0.18
   7   1   0    1.71    0.16
   7   1   0    1.75    0.15
  -7   1   0    1.99    0.16
  -8  -1   0    0.48    0.12
   8  -1   0    0.47    0.12
  -8  -1   0    0.52    0.13
   8  -1   0    0.45    0.13
  -8   1   0    0.28    0.11
  -8   1   0    0.65    0.14
   8   1   0    0.24    0.13
   8   1   0    0.32    0.12
   9  -1   0   -0.06    0.17
  -9  -1   0    0.05    0.13
  -9  -1   0    0.09    0.15
   9  -1   0   -0.04    0.12
   9   1   0    0.07    0.14
  -9   1   0   -0.11    0.15
  -9   1   0    0.14    0.13
   9   1   0    0.30    0.18
  10  -1   0    0.19    0.17
  10  -1   0   -0.12    0.15
 -10   1   0   -0.06    0.16
 -10   1   0    0.23    0.20
  10   1   0    0.21    0.16
  10   1   0    0.05    0.16
 -11  -1   0    0.49    0.22
  11  -1   0    0.04    0.28
  11   1   0    0.54    0.28
  11   1   0    0.45    0.22
 -11   1   0    0.19    0.19
 -12  -1   0    0.29    0.22
  12  -1   0    0.23    0.30
  12   1   0    0.36    0.24
 -12   1   0    0.15    0.26
  13  -1   0    0.14    0.32
  13   1   0   -0.16    0.38
   0  -2   0   19.22    0.51
   0   2   0   22.10    0.50
   0   2   0   21.83    0.48
   0   2   0   21.77    0.49
   0   2   0   22.07    0.49
   1  -2   0    0.93    0.04
   1  -2   0    0.94    0.04
  -1  -2   0    1.12    0.04
   1  -2   0    0.97    0.04
  -1  -2   0    0.96    0.04
  -1  -2   0    1.01    0.04
   1   2   0    1.08    0.04
   1   2   0    0.95    0.04
   1   2   0    0.99    0.04
  -1   2   0    0.84    0.04
  -1   2   0    0.95    0.04
  -2  -2   0   15.24    0.36
   2  -2   0   15.26    0.37
  -2  -2   0   15.29    0.36
   2  -2   0   15.50    0.37
  -2   2   0   15.14    0.37
  -2   2   0   15.61    0.37
   2   2   0   14.93    0.36
   2   2   0   14.99    0.36
   3  -2   0   12.50    0.32
  -3  -2   0   12.74    0.32
  -3  -2   0   12.62    0.32
   3  -2   0   12.59    0.32
   3   2   0   12.73    0.32
   3   2   0   12.62    0.32
  -3   2   0   12.18    0.32
  -3   2   0   12.06    0.32
  -4  -2   0   -0.02    0.04
   4  -2   0   -0.06    0.04
  -4  -2   0    0.02    0.04
   4  -2   0   -0.03    0.04
  -4   2   0    0.00    0.04
  -4   2   0   -0.04    0.04
   4   2   0   -0.06    0.04
   4   2   0   -0.02    0.04
  -5  -2   0    0.32    0.06
   5  -2   0    0.45    0.07
  -5  -2   0    0.56    0.08
   5  -2   0    0.51    0.08
  -5   2   0    0.53    0.08
   5   2   0    0.50    0.08
  -5   2   0    0.63    0.08
   5   2   0    0.61    0.08
  -6  -2   0    0.21    0.07
   6  -2   0    0.16    0.08
  -6  -2   0    0.22    0.07
   6  -2   0    0.24    0.08
  -6   2   0    0.23    0.08
   6   2   0    0.30    0.09
   6   2   0    0.13    0.07
  -6   2   0    0.15    0.07
   7  -2   0    0.28    0.10
  -7  -2   0    0.30    0.09
  -7  -2   0    0.17    0.08
   7  -2   0    0.26    0.09
  -7   2   0    0.39    0.10
   7   2   0    0.13    0.09
  -7   2   0    0.11    0.08
   7   2   0    0.08    0.08
  -8  -2   0    1.15    0.16
   8  -2   0    1.08    0.16
  -8  -2   0    1.16    0.14
   8  -2   0    1.16    0.14
  -8   2   0    0.92    0.14
   8   2   0    0.90    0.15
  -8   2   0    1.18    0.15
   8   2   0    0.85    0.14
  -9  -2   0    0.16    0.13
  -9  -2   0   -0.01    0.13
   9  -2   0    0.23    0.22
   9  -2   0    0.23    0.14
   9   2   0    0.19    0.17
  -9   2   0    0.00    0.14
  -9   2   0    0.28    0.14
   9   2   0    0.00    0.13
  10  -2   0    0.51    0.17
 -10  -2   0    0.32    0.21
  10  -2   0    0.29    0.20
 -10  -2   0    0.63    0.20
  10   2   0    0.59    0.21
 -10   2   0    0.52    0.20
 -10   2   0    0.14    0.18
  10   2   0    0.26    0.17
  11  -2   0    0.47    0.23
 -11  -2   0    0.46    0.20
  11   2   0   -0.05    0.23
  11   2   0    0.10    0.20
 -11   2   0    0.10    0.18
 -12  -2   0   -0.28    0.26
  12  -2   0    0.44    0.28
 -12   2   0   -0.07    0.23
  12   2   0   -0.10    0.13
   0  -3   0   -0.02    0.02
   0  -3   0    0.01    0.02
   0   3   0   -0.01    0.02
   0   3   0    0.02    0.02
   0   3   0    0.00    0.02
   0   3   0   -0.02    0.03
  -1  -3   0  253.80    5.66
  -1  -3   0  245.76    5.64
  -1  -3   0  248.47    5.57
   1  -3   0  249.01    5.64
   1  -3   0  252.83    5.59
   1  -3   0  249.72    5.70
   1   3   0  253.53    5.63
  -1   3   0  250.78    5.63
   1   3   0  255.36    5.57
   1   3   0  258.78    5.76
   1   3   0  251.76    5.66
   1   3   0  248.94    5.64
  -1   3   0  229.57    5.60
  -1   3   0  254.31    5.60
  -2  -3   0   32.89    0.76
  -2  -3   0   33.17    0.76
   2  -3   0   34.41    0.77
  -2  -3   0   32.56    0.76
   2  -3   0   33.34    0.77
   2  -3   0   33.48    0.76
  -2   3   0   33.06    0.76
  -2   3   0   33.16    0.76
   2   3   0   33.55    0.76
   2   3   0   33.31    0.76
  -3  -3   0    0.86    0.06
   3  -3   0    0.92    0.06
  -3  -3   0    0.79    0.05
   3  -3   0    0.96    0.07
  -3   3   0    0.95    0.06
   3   3   0    0.90    0.06
   3   3   0    0.90    0.06
  -3   3   0    0.79    0.07
   4  -3   0    7.17    0.22
  -4  -3   0    7.20    0.22
   4  -3   0    7.29    0.22
  -4  -3   0    7.02    0.21
  -4   3   0    7.17    0.22
   4   3   0    7.30    0.22
  -4   3   0    6.94    0.22
   4   3   0    6.84    0.21
  -5  -3   0    0.07    0.05
  -5  -3   0    0.05    0.06
   5  -3   0    0.13    0.07
   5  -3   0    0.11    0.06
   5   3   0    0.04    0.06
  -5   3   0    0.06    0.06
   5   3   0    0.06    0.05
  -5   3   0    0.10    0.06
   6  -3   0    0.52    0.08
   6  -3   0    0.39    0.09
  -6  -3   0    0.49    0.10
  -6  -3   0    0.44    0.08
   6   3   0    0.40    0.08
   6   3   0    0.52    0.09
  -6   3   0    0.60    0.10
  -6   3   0    0.36    0.09
  -7  -3   0    0.91    0.11
   7  -3   0    0.80    0.12
   7  -3   0    0.80    0.12
  -7  -3   0    0.70    0.11
   7   3   0    0.69    0.12
  -7   3   0    0.62    0.10
   7   3   0    0.63    0.12
  -7   3   0    0.75    0.12
   8  -3   0    3.91    0.24
  -8  -3   0    3.43    0.21
   8  -3   0    4.20    0.23
  -8  -3   0    3.91    0.24
  -8   3   0    4.18    0.23
   8   3   0    3.74    0.29
  -8   3   0    3.72    0.24
   8   3   0    4.09    0.24
  -9  -3   0    0.07    0.12
  -9  -3   0    0.15    0.14
   9  -3   0   -0.06    0.13
   9  -3   0    0.13    0.21
   9   3   0   -0.04    0.14
  -9   3   0   -0.02    0.13
  -9   3   0    0.10    0.13
   9   3   0    0.04    0.12
  10  -3   0    0.49    0.21
  10  -3   0    0.52    0.20
 -10  -3   0    0.61    0.23
  10   3   0    0.51    0.20
 -10   3   0    0.90    0.22
 -10   3   0    0.46    0.17
  10   3   0    0.51    0.19
  11  -3   0    0.35    0.26
 -11  -3   0    0.28    0.18
 -11   3   0    0.02    0.17
  11   3   0   -0.19    0.22
  11   3   0    0.03    0.20
  12  -3   0    0.10    0.32
 -12  -3   0    0.03    0.27
  12   3   0    0.00    0.16
   0  -4   0    1.39    0.07
   0  -4   0    1.42    0.08
   0   4   0    1.46    0.08
   0   4   0    1.42    0.06
   0   4   0    1.42    0.07
   0   4   0    1.44    0.07
  -1  -4   0    8.10    0.22
  -1  -4   0    8.15    0.19
   1  -4   0    7.93    0.23
  -1  -4   0    7.85    0.19
   1  -4   0    7.82    0.22
   1  -4   0    8.00    0.20
  -1  -4   0    8.26    0.21
   1   4   0    8.07    0.19
   1   4   0    8.42    0.22
  -1   4   0    8.33    0.23
  -1   4   0    8.10    0.20
  -1   4   0    8.16    0.20
   1   4   0    8.12    0.21
   1   4   0    7.75    0.22
  -1   4   0    8.20    0.22
   1   4   0    8.37    0.23
  -2  -4   0   69.80    1.56
  -2  -4   0   69.17    1.54
   2  -4   0   69.08    1.57
   2  -4   0   69.33    1.58
   2  -4   0   69.77    1.55
  -2  -4   0   68.12    1.55
  -2  -4   0   68.72    1.55
   2  -4   0   69.53    1.55
   2   4   0   70.47    1.54
   2   4   0   68.48    1.55
  -2   4   0   70.73    1.55
   2   4   0   66.44    1.54
  -2   4   0   68.70    1.55
   3  -4   0    3.47    0.12
  -3  -4   0    3.56    0.12
   3  -4   0    3.62    0.13
   3  -4   0    3.45    0.13
  -3  -4   0    3.75    0.12
  -3  -4   0    3.41    0.12
   3   4   0    3.62    0.12
  -3   4   0    3.41    0.13
  -3   4   0    3.60    0.13
   3   4   0    3.63    0.12
  -4  -4   0    4.28    0.16
  -4  -4   0    4.41    0.14
   4  -4   0    4.31    0.16
   4  -4   0    4.67    0.17
  -4  -4   0    4.35    0.15
   4   4   0    4.45    0.16
  -4   4   0    4.41    0.16
   4   4   0    4.45    0.15
  -4   4   0    4.22    0.16
  -5  -4   0    0.05    0.05
   5  -4   0    0.05    0.06
  -5  -4   0    0.05    0.06
   5  -4   0    0.03    0.06
  -5   4   0   -0.02    0.05
   5   4   0    0.02    0.06
  -5   4   0    0.09    0.05
   5   4   0    0.10    0.06
   6  -4   0    0.03    0.08
  -6  -4   0    0.13    0.07
  -6  -4   0    0.00    0.06
   6  -4   0    0.04    0.08
   6   4   0    0.00    0.07
   6   4   0   -0.04    0.07
  -6   4   0    0.07    0.07
  -6   4   0    0.05    0.08
  -7  -4   0    0.08    0.08
   7  -4   0    0.17    0.10
   7  -4   0   -0.14    0.09
  -7  -4   0    0.11    0.09
  -7   4   0   -0.06    0.10
  -7   4   0    0.01    0.08
   7   4   0   -0.11    0.08
   7   4   0    0.00    0.09
  -8  -4   0   -0.05    0.12
  -8  -4   0   -0.02    0.10
   8  -4   0   -0.27    0.13
   8  -4   0   -0.16    0.10
   8   4   0    0.00    0.16
   8   4   0   -0.05    0.12
  -8   4   0    0.09    0.13
  -8   4   0    0.18    0.12
   9  -4   0    0.02    0.20
  -9  -4   0    0.43    0.16
  -9  -4   0    0.24    0.16
   9  -4   0    0.13    0.14
   9   4   0    0.16    0.16
   9   4   0    0.02    0.13
  -9   4   0   -0.10    0.14
  -9   4   0    0.15    0.14
  10  -4   0    0.38    0.23
 -10  -4   0    0.66    0.24
 -10   4   0    0.53    0.18
  10   4   0    0.24    0.17
 -10   4   0    0.74    0.24
  10   4   0    0.13    0.17
 -11  -4   0    0.61    0.22
  11  -4   0    0.65    0.29
 -11   4   0    0.59    0.21
  11   4   0    0.01    0.21
  11   4   0    0.42    0.23
 -12  -4   0   -0.50    0.27
  12  -4   0    0.15    0.29
  12   4   0   -0.32    0.13
   0  -5   0    0.02    0.04
   0  -5   0   -0.01    0.03
   0   5   0    0.04    0.04
   0   5   0    0.00    0.03
   0   5   0    0.02    0.03
  -1  -5   0    4.10    0.15
  -1  -5   0    4.44    0.10
  -1  -5   0    4.11    0.14
  -1  -5   0    4.06    0.10
   1  -5   0    4.06    0.14
   1  -5   0    4.18    0.15
   1  -5   0    4.17    0.11
  -1   5   0    4.39    0.11
  -1   5   0    4.26    0.11
   1   5   0    4.19    0.10
   1   5   0    4.36    0.14
  -1   5   0    4.26    0.14
   1   5   0    4.26    0.13
   1   5   0    4.20    0.15
   1   5   0    4.35    0.16
   1   5   0    4.43    0.10
  -1   5   0    4.42    0.15
   2  -5   0    1.37    0.08
  -2  -5   0    1.43    0.08
  -2  -5   0    1.39    0.09
   2  -5   0    1.45    0.07
   2  -5   0    1.37    0.07
  -2  -5   0    1.38    0.06
   2  -5   0    1.40    0.09
   2   5   0    1.25    0.09
  -2   5   0    1.35    0.07
  -2   5   0    1.42    0.07
   2   5   0    1.37    0.06
   2   5   0    1.50    0.07
   2   5   0    1.29    0.06
   2   5   0    1.48    0.08
  -3  -5   0    2.53    0.10
   3  -5   0    2.52    0.12
  -3  -5   0    2.63    0.10
  -3  -5   0    2.72    0.12
  -3  -5   0    2.59    0.11
   3  -5   0    2.48    0.11
   3   5   0    2.55    0.10
  -3   5   0    2.55    0.11
   3   5   0    2.43    0.10
  -3   5   0    2.45    0.10
   4  -5   0    6.65    0.22
  -4  -5   0    6.72    0.21
   4  -5   0    6.81    0.21
  -4  -5   0    6.82    0.21
  -4  -5   0    6.63    0.20
   4  -5   0    6.47    0.22
  -4   5   0    6.64    0.21
  -4   5   0    6.57    0.21
   4   5   0    6.64    0.21
   4   5   0    6.61    0.20
   5  -5   0    0.42    0.08
  -5  -5   0    0.37    0.06
   5  -5   0    0.31    0.08
  -5  -5   0    0.35    0.07
  -5   5   0    0.35    0.07
   5   5   0    0.37    0.08
  -5   5   0    0.28    0.07
   5   5   0    0.26    0.07
   6  -5   0    0.69    0.10
  -6  -5   0    0.76    0.10
   6  -5   0    0.61    0.11
  -6  -5   0    0.84    0.10
  -6  -5   0    0.81    0.10
  -6   5   0    0.96    0.12
   6   5   0    0.85    0.11
  -6   5   0    0.80    0.10
   6   5   0    0.55    0.09
  -7  -5   0    1.00    0.12
  -7  -5   0    1.13    0.13
   7  -5   0    1.08    0.14
  -7  -5   0    1.26    0.14
   7  -5   0    1.08    0.13
   7   5   0    1.24    0.15
   7   5   0    1.03    0.14
  -7   5   0    0.94    0.12
  -7   5   0    1.10    0.16
  -8  -5   0    0.53    0.10
   8  -5   0    0.36    0.14
  -8  -5   0    0.62    0.13
  -8  -5   0    0.30    0.13
   8  -5   0    0.45    0.14
  -8   5   0    0.56    0.13
   8   5   0    0.55    0.16
  -8   5   0    0.65    0.14
  -9  -5   0    0.29    0.14
   9  -5   0   -0.20    0.16
  -9  -5   0   -0.01    0.15
  -9  -5   0    0.03    0.15
   9  -5   0    0.08    0.17
  -9   5   0    0.17    0.14
  -9   5   0    0.18    0.15
   9   5   0   -0.09    0.13
   9   5   0    0.21    0.15
 -10  -5   0    0.00    0.18
  10  -5   0    0.06    0.23
 -10  -5   0    0.06    0.15
  10   5   0    0.14    0.23
  10   5   0    0.08    0.18
 -10   5   0    0.18    0.20
 -10   5   0    0.29    0.19
 -11  -5   0   -0.16    0.16
  11  -5   0    0.20    0.30
 -11  -5   0   -0.18    0.20
  11   5   0   -0.40    0.23
  11   5   0    0.28    0.22
 -11   5   0   -0.23    0.26
 -11   5   0    0.11    0.19
 -12  -5   0   -0.30    0.21
  12  -5   0   -0.40    0.35
 -12  -5   0   -0.28    0.28
   0  -6   0   38.90    0.95
   0  -6   0   39.24    0.93
   0   6   0   39.96    0.93
   0   6   0   40.10    0.94
   0   6   0   39.41    0.95
   0   6   0   39.64    0.92
   1  -6   0    3.17    0.09
   1  -6   0    2.95    0.11
  -1  -6   0    3.02    0.13
   1  -6   0    3.01    0.09
  -1  -6   0    3.12    0.12
   1  -6   0    3.06    0.14
   1  -6   0    3.06    0.13
   1   6   0    3.08    0.12
  -1   6   0    3.14    0.14
   1   6   0    3.09    0.13
  -1   6   0    3.03    0.13
  -1   6   0    3.15    0.09
  -1   6   0    3.03    0.09
   1   6   0    3.03    0.14
   1   6   0    3.11    0.13
  -2  -6   0    3.21    0.13
  -2  -6   0    3.23    0.09
   2  -6   0    3.19    0.14
  -2  -6   0    2.81    0.11
   2  -6   0    3.01    0.14
   2  -6   0    3.05    0.11
   2  -6   0    3.08    0.11
  -2  -6   0    3.00    0.14
   2   6   0    3.09    0.13
   2   6   0    3.16    0.12
   2   6   0    3.28    0.15
   2   6   0    3.25    0.13
  -2   6   0    3.21    0.11
  -2   6   0    3.30    0.11
   2   6   0    3.21    0.09
   2   6   0    3.20    0.10
   3  -6   0    0.88    0.09
  -3  -6   0    1.02    0.07
   3  -6   0    1.04    0.08
   3  -6   0    0.98    0.08
  -3  -6   0    0.96    0.07
  -3  -6   0    0.95    0.09
  -3  -6   0    1.09    0.11
   3  -6   0    1.07    0.11
  -3   6   0    1.00    0.07
   3   6   0    1.17    0.10
   3   6   0    1.04    0.07
   3   6   0    0.97    0.07
  -3   6   0    0.98    0.08
   3   6   0    1.02    0.07
  -4  -6   0    0.01    0.06
   4  -6   0    0.02    0.06
  -4  -6   0   -0.03    0.05
   4  -6   0   -0.05    0.05
   4  -6   0   -0.04    0.06
  -4  -6   0   -0.05    0.05
  -4   6   0    0.04    0.05
   4   6   0   -0.07    0.04
   4   6   0   -0.07    0.05
  -4   6   0   -0.05    0.05
   5  -6   0    1.27    0.13
   5  -6   0    1.25    0.12
  -5  -6   0    1.34    0.11
  -5  -6   0    1.37    0.11
   5  -6   0    1.56    0.13
  -5  -6   0    1.38    0.11
  -5  -6   0    1.35    0.12
  -5   6   0    1.43    0.12
   5   6   0    1.51    0.11
   5   6   0    1.20    0.12
  -5   6   0    1.45    0.12
   6  -6   0    1.56    0.15
   6  -6   0    1.83    0.16
  -6  -6   0    1.67    0.14
  -6  -6   0    1.77    0.14
   6  -6   0    2.01    0.16
  -6  -6   0    1.54    0.13
   6   6   0    1.61    0.14
  -6   6   0    1.61    0.15
   6   6   0    1.61    0.14
  -6   6   0    1.89    0.14
  -7  -6   0    0.44    0.11
   7  -6   0    0.13    0.10
   7  -6   0    0.30    0.11
   7  -6   0    0.45    0.13
  -7  -6   0    0.41    0.11
  -7  -6   0    0.33    0.09
   7   6   0    0.35    0.11
   7   6   0    0.25    0.11
  -7   6   0    0.37    0.12
  -7   6   0    0.39    0.13
   8  -6   0    0.05    0.14
  -8  -6   0    0.12    0.11
   8  -6   0    0.11    0.13
  -8  -6   0    0.16    0.09
  -8  -6   0    0.03    0.13
  -8   6   0    0.07    0.14
  -8   6   0   -0.08    0.13
   8   6   0   -0.10    0.13
   8   6   0    0.12    0.21
  -9  -6   0    0.45    0.14
   9  -6   0    0.51    0.20
  -9  -6   0    0.33    0.15
   9  -6   0    0.36    0.18
  -9   6   0    0.72    0.18
   9   6   0    0.20    0.16
   9   6   0    0.21    0.15
  -9   6   0    0.28    0.14
  10  -6   0    0.46    0.43
 -10  -6   0    0.35    0.18
 -10  -6   0    0.14    0.16
  10   6   0    0.26    0.17
 -10   6   0    0.17    0.18
  10   6   0    0.15    0.19
 -10   6   0   -0.03    0.20
 -11  -6   0   -0.13    0.19
  11  -6   0    0.20    0.20
  11  -6   0    0.26    0.29
 -11   6   0    0.41    0.29
  11   6   0   -0.11    0.20
  11   6   0   -0.23    0.22
 -11   6   0   -0.44    0.20
 -12  -6   0   -0.20    0.30
 -12  -6   0    0.01    0.23
  12  -6   0    0.32    0.37
  12  -6   0    0.18    0.24
 -12   6   0    0.23    0.29
  12   6   0    0.54    0.30
   0  -7   0    0.04    0.05
   0  -7   0    0.02    0.04
   0   7   0    0.04    0.06
   0   7   0    0.02    0.06
   0   7   0    0.02    0.05
   0   7   0    0.02    0.05
   1  -7   0   41.34    0.97
   1  -7   0   40.08    0.95
  -1  -7   0   39.91    0.96
   1  -7   0   40.55    0.99
   1  -7   0   40.27    0.92
   1  -7   0   40.21    0.91
   1   7   0   40.75    0.97
  -1   7   0   41.48    0.97
  -1   7   0   40.59    0.91
   1   7   0   40.88    0.95
  -1   7   0   42.13    0.99
  -1   7   0   39.55    0.91
   1   7   0   41.24    0.97
   1   7   0   42.33    1.00
  -2  -7   0    3.19    0.09
   2  -7   0    3.06    0.11
  -2  -7   0    3.09    0.16
  -2  -7   0    3.08    0.14
  -2  -7   0    3.32    0.10
   2  -7   0    3.15    0.15
   2  -7   0    2.95    0.15
   2   7   0    3.17    0.09
   2   7   0    3.16    0.13
  -2   7   0    3.25    0.18
   2   7   0    3.09    0.09
   2   7   0    3.30    0.15
   2   7   0    3.25    0.16
  -2   7   0    3.07    0.11
  -2   7   0    3.21    0.11
   2   7   0    3.26    0.16
  -3  -7   0   17.33    0.42
   3  -7   0   17.56    0.44
   3  -7   0   17.61    0.44
   3  -7   0   16.99    0.48
  -3  -7   0   17.65    0.45
  -3  -7   0   18.08    0.47
   3  -7   0   17.32    0.47
   3   7   0   17.49    0.44
  -3   7   0   17.62    0.44
   3   7   0   17.19    0.53
   3   7   0   17.51    0.42
  -3   7   0   17.47    0.44
   3   7   0   17.55    0.42
   3   7   0   18.02    0.47
  -4  -7   0    7.30    0.22
   4  -7   0    7.36    0.26
   4  -7   0    7.51    0.26
  -4  -7   0    7.54    0.22
   4  -7   0    7.62    0.24
  -4  -7   0    7.57    0.24
  -4  -7   0    7.34    0.26
  -4   7   0    7.38    0.23
   4   7   0    7.27    0.22
   4   7   0    7.29    0.22
   4   7   0    7.32    0.25
  -4   7   0    7.43    0.23
  -5  -7   0    2.01    0.13
   5  -7   0    1.97    0.14
  -5  -7   0    1.92    0.13
   5  -7   0    2.22    0.16
   5  -7   0    2.00    0.15
  -5  -7   0    1.80    0.16
  -5  -7   0    2.01    0.14
   5   7   0    1.79    0.12
  -5   7   0    1.97    0.14
  -5   7   0    2.11    0.13
   5   7   0    2.05    0.13
  -6  -7   0    3.50    0.20
  -6  -7   0    4.11    0.19
   6  -7   0    3.78    0.20
  -6  -7   0    3.77    0.19
   6  -7   0    3.62    0.21
  -6  -7   0    3.95    0.18
   6  -7   0    3.87    0.21
   6   7   0    3.73    0.19
  -6   7   0    3.55    0.19
  -6   7   0    3.83    0.20
   6   7   0    3.71    0.18
   7  -7   0    0.50    0.14
  -7  -7   0    0.65    0.13
   7  -7   0    0.88    0.14
  -7  -7   0    0.70    0.12
  -7  -7   0    0.69    0.13
  -7  -7   0    0.83    0.12
   7  -7   0    0.57    0.11
  -7   7   0    0.60    0.14
  -7   7   0    0.71    0.15
   7   7   0    0.54    0.16
   7   7   0    0.67    0.12
   8  -7   0    0.00    0.13
  -8  -7   0    0.19    0.12
   8  -7   0    0.09    0.14
  -8  -7   0    0.03    0.13
   8  -7   0    0.10    0.13
  -8  -7   0    0.24    0.13
  -8   7   0    0.13    0.14
  -8   7   0    0.36    0.15
   8   7   0   -0.17    0.11
   8   7   0    0.03    0.13
  -9  -7   0    0.04    0.14
   9  -7   0   -0.16    0.18
   9  -7   0   -0.03    0.14
  -9  -7   0    0.01    0.16
  -9   7   0   -0.06    0.16
  -9   7   0   -0.03    0.14
   9   7   0    0.23    0.17
   9   7   0   -0.01    0.15
  10  -7   0    0.36    0.25
 -10  -7   0    0.57    0.17
 -10  -7   0    0.24    0.18
  10  -7   0    0.82    0.20
 -10   7   0    0.40    0.15
 -10   7   0    0.56    0.25
  10   7   0    0.65    0.20
  10   7   0    0.56    0.22
 -11  -7   0   -0.07    0.26
  11  -7   0    0.10    0.22
 -11  -7   0    0.18    0.22
  11  -7   0   -0.19    0.30
  11   7   0    0.12    0.26
  11   7   0   -0.20    0.13
  12  -7   0   -0.33    0.26
 -12  -7   0   -0.60    0.28
 -12  -7   0    0.15    0.25
  12  -7   0    0.58    0.37
   0  -8   0    2.93    0.15
   0  -8   0    2.91    0.15
   0   8   0    2.78    0.17
   0   8   0    2.94    0.14
   0   8   0    2.82    0.15
   0   8   0    3.27    0.16
   1  -8   0    1.37    0.11
   1  -8   0    1.44    0.06
   1  -8   0    1.39    0.05
   1  -8   0    1.52    0.12
  -1  -8   0    1.48    0.11
   1   8   0    1.40    0.10
  -1   8   0    1.53    0.11
  -1   8   0    1.51    0.14
   1   8   0    1.31    0.11
  -1   8   0    1.51    0.13
   1   8   0    1.53    0.12
   1   8   0    1.47    0.11
   1   8   0    1.61    0.15
   2  -8   0    0.57    0.06
  -2  -8   0    0.58    0.04
  -2  -8   0    0.51    0.09
   2  -8   0    0.79    0.10
   2  -8   0    0.67    0.08
   2  -8   0    0.73    0.10
  -2  -8   0    0.66    0.04
   2   8   0    0.74    0.10
   2   8   0    0.68    0.11
  -2   8   0    0.71    0.06
   2   8   0    0.54    0.03
  -2   8   0    0.66    0.10
   2   8   0    0.60    0.07
  -2   8   0    0.60    0.06
   2   8   0    0.65    0.11
  -3  -8   0    4.22    0.20
  -3  -8   0    4.09    0.18
   3  -8   0    4.40    0.19
  -3  -8   0    4.06    0.13
   3  -8   0    4.12    0.15
   3  -8   0    4.11    0.15
   3  -8   0    4.01    0.19
  -3  -8   0    4.30    0.14
   3   8   0    4.06    0.16
  -3   8   0    4.20    0.15
   3   8   0    3.99    0.13
  -3   8   0    4.10    0.15
   3   8   0    4.45    0.21
   3   8   0    4.28    0.13
   4  -8   0    3.65    0.18
  -4  -8   0    3.86    0.18
   4  -8   0    3.68    0.16
  -4  -8   0    3.84    0.20
  -4  -8   0    3.74    0.15
  -4  -8   0    3.81    0.14
   4  -8   0    3.64    0.19
   4  -8   0    3.86    0.17
   4   8   0    3.57    0.13
  -4   8   0    3.57    0.15
   4   8   0    3.60    0.15
   4   8   0    3.68    0.19
   4   8   0    3.97    0.20
  -4   8   0    3.88    0.16
  -5  -8   0    0.23    0.10
   5  -8   0    0.30    0.09
   5  -8   0    0.33    0.08
  -5  -8   0    0.19    0.09
  -5  -8   0    0.29    0.07
   5  -8   0    0.21    0.10
   5  -8   0    0.21    0.08
   5   8   0    0.26    0.07
  -5   8   0    0.21    0.08
  -5   8   0    0.24    0.09
   5   8   0    0.35    0.11
   5   8   0    0.33    0.08
  -6  -8   0    3.64    0.19
  -6  -8   0    3.65    0.23
   6  -8   0    3.84    0.21
   6  -8   0    3.46    0.20
  -6  -8   0    4.14    0.19
  -6  -8   0    3.50    0.19
   6  -8   0    3.21    0.20
   6  -8   0    3.67    0.22
  -6   8   0    3.68    0.20
  -6   8   0    3.76    0.22
   6   8   0    3.88    0.19
   6   8   0    3.47    0.18
   6   8   0    3.91    0.21
   7  -8   0   -0.23    0.11
  -7  -8   0    0.14    0.11
  -7  -8   0    0.05    0.10
   7  -8   0    0.00    0.12
  -7  -8   0    0.12    0.10
  -7  -8   0    0.08    0.13
   7  -8   0    0.01    0.11
   7   8   0    0.17    0.15
   7   8   0    0.01    0.09
  -7   8   0    0.16    0.12
  -7   8   0    0.28    0.12
  -8  -8   0    0.13    0.16
   8  -8   0    0.00    0.15
  -8  -8   0   -0.12    0.12
   8  -8   0    0.13    0.17
  -8  -8   0    0.00    0.13
  -8  -8   0   -0.11    0.15
   8  -8   0    0.14    0.16
   8   8   0   -0.10    0.16
  -8   8   0    0.03    0.15
   8   8   0   -0.14    0.13
  -8   8   0   -0.12    0.11
   9  -8   0    0.22    0.17
  -9  -8   0    0.15    0.15
  -9  -8   0    0.16    0.20
   9  -8   0    0.52    0.20
  -9   8   0    0.20    0.19
   9   8   0    0.17    0.17
  -9   8   0    0.02    0.17
  10  -8   0    0.16    0.20
  10  -8   0    0.38    0.31
 -10  -8   0   -0.01    0.20
 -10  -8   0    0.17    0.19
 -10   8   0    0.29    0.25
  10   8   0    0.01    0.21
 -10   8   0   -0.12    0.19
  10   8   0    0.11    0.22
  11  -8   0    0.14    0.34
 -11  -8   0    0.22    0.24
 -11  -8   0    0.34    0.33
  11  -8   0    0.29    0.24
  11   8   0   -0.04    0.16
 -11   8   0    0.34    0.36
   0  -9   0   -0.02    0.06
   0  -9   0    0.02    0.07
   0   9   0   -0.02    0.09
   0   9   0   -0.05    0.07
   0   9   0    0.03    0.07
   0   9   0    0.05    0.07
   1  -9   0    0.40    0.08
   1  -9   0    0.48    0.09
   1   9   0    0.32    0.09
  -1   9   0    0.33    0.10
   1   9   0    0.27    0.08
  -1   9   0    0.38    0.09
   1   9   0    0.39    0.07
   1   9   0    0.47    0.08
  -1   9   0    0.34    0.09
   1   9   0    0.40    0.11
   2  -9   0    0.59    0.08
   2  -9   0    0.64    0.10
   2  -9   0    0.63    0.10
   2  -9   0    0.53    0.06
   2  -9   0    0.48    0.05
   2   9   0    0.57    0.10
   2   9   0    0.58    0.09
  -2   9   0    0.58    0.06
   2   9   0    0.80    0.09
   2   9   0    0.77    0.12
  -2   9   0    0.62    0.11
  -2   9   0    0.61    0.05
  -3  -9   0    0.79    0.07
  -3  -9   0    0.93    0.06
   3  -9   0    0.96    0.09
   3  -9   0    0.80    0.09
   3  -9   0    0.70    0.11
  -3  -9   0    0.61    0.12
   3  -9   0    0.88    0.13
   3   9   0    0.53    0.10
   3   9   0    0.47    0.09
  -3   9   0    0.87    0.08
   3   9   0    0.83    0.07
   3   9   0    0.74    0.06
  -3   9   0    0.84    0.08
   4  -9   0    1.23    0.11
   4  -9   0    1.45    0.16
  -4  -9   0    1.36    0.15
   4  -9   0    1.34    0.15
  -4  -9   0    1.17    0.11
  -4  -9   0    1.20    0.15
   4   9   0    1.13    0.13
  -4   9   0    1.21    0.11
  -4   9   0    1.14    0.11
   4   9   0    1.34    0.10
   4   9   0    1.34    0.09
   4   9   0    1.43    0.14
  -5  -9   0    0.14    0.10
  -5  -9   0    0.08    0.07
   5  -9   0    0.07    0.10
   5  -9   0    0.11    0.09
   5  -9   0    0.04    0.09
   5  -9   0    0.04    0.08
  -5  -9   0   -0.10    0.07
  -5  -9   0    0.17    0.12
   5   9   0    0.06    0.06
   5   9   0    0.07    0.07
   5   9   0   -0.08    0.11
  -5   9   0   -0.02    0.07
   5   9   0   -0.01    0.09
  -5   9   0    0.09    0.09
  -6  -9   0    2.75    0.24
  -6  -9   0    2.60    0.20
   6  -9   0    2.62    0.21
   6  -9   0    2.25    0.20
   6  -9   0    2.93    0.19
  -6  -9   0    2.47    0.16
  -6  -9   0    2.60    0.17
   6  -9   0    2.47    0.19
  -6   9   0    2.39    0.19
   6   9   0    2.70    0.18
   6   9   0    2.67    0.23
   6   9   0    2.43    0.16
  -6   9   0    2.84    0.21
  -7  -9   0    0.10    0.12
   7  -9   0    0.11    0.13
  -7  -9   0    0.01    0.12
  -7  -9   0    0.18    0.16
   7  -9   0    0.06    0.10
   7  -9   0   -0.07    0.13
  -7  -9   0   -0.16    0.09
   7   9   0   -0.16    0.09
  -7   9   0    0.01    0.13
  -7   9   0   -0.04    0.11
   7   9   0    0.04    0.13
   7   9   0   -0.08    0.13
  -8  -9   0    0.19    0.19
  -8  -9   0    0.54    0.16
  -8  -9   0    0.68    0.30
   8  -9   0    1.31    0.23
   8  -9   0    0.49    0.18
   8  -9   0    0.51    0.17
   8  -9   0    0.47    0.14
  -8  -9   0    0.71    0.15
   8   9   0    0.59    0.17
  -8   9   0    0.34    0.15
   8   9   0    0.38    0.14
   8   9   0    0.31    0.15
  -8   9   0    0.64    0.18
   9  -9   0   -0.01    0.18
   9  -9   0    0.19    0.22
  -9  -9   0   -0.11    0.16
  -9  -9   0    0.05    0.19
  -9   9   0    0.00    0.16
  -9   9   0    0.08    0.18
   9   9   0    0.01    0.16
   9   9   0   -0.02    0.19
  10  -9   0    0.16    0.21
 -10  -9   0   -0.36    0.21
  10  -9   0    0.60    0.30
 -10  -9   0    0.13    0.21
 -10   9   0   -0.13    0.24
  10   9   0    0.00    0.21
 -10   9   0   -0.22    0.17
  11  -9   0    0.27    0.31
  11  -9   0    0.17    0.26
 -11  -9   0   -0.61    0.22
 -11   9   0   -0.26    0.24
   0 -10   0    0.16    0.09
   0 -10   0   -0.02    0.07
   0  10   0   -0.04    0.09
   0  10   0    0.01    0.09
   0  10   0    0.01    0.10
   0  10   0    0.05    0.06
   1 -10   0    0.28    0.09
   1 -10   0    0.06    0.09
   1  10   0    0.23    0.08
  -1  10   0    0.31    0.11
   1  10   0    0.22    0.11
   1  10   0    0.16    0.10
  -1  10   0    0.09    0.07
   1  10   0    0.17    0.08
  -1  10   0    0.30    0.10
  -1  10   0    0.20    0.11
   2 -10   0    5.11    0.15
   2 -10   0    4.78    0.14
   2 -10   0    5.25    0.24
   2 -10   0    4.72    0.22
   2  10   0    4.64    0.23
   2  10   0    4.74    0.22
  -2  10   0    5.00    0.23
   2  10   0    5.18    0.24
   2  10   0    5.08    0.21
   2  10   0    4.90    0.20
  -2  10   0    4.86    0.24
  -2  10   0    4.58    0.15
  -3 -10   0   -0.07    0.03
   3 -10   0    0.05    0.10
  -3 -10   0    0.08    0.13
   3 -10   0   -0.01    0.08
   3 -10   0    0.11    0.08
   3  10   0    0.02    0.09
  -3  10   0   -0.06    0.05
   3  10   0    0.11    0.11
  -3  10   0    0.00    0.05
   3  10   0    0.06    0.08
   4 -10   0    6.15    0.27
   4 -10   0    6.04    0.22
   4 -10   0    5.75    0.22
  -4 -10   0    6.14    0.26
   4 -10   0    6.15    0.28
  -4 -10   0    6.19    0.19
  -4 -10   0    6.34    0.29
   4  10   0    6.21    0.29
  -4  10   0    6.13    0.21
   4  10   0    6.14    0.18
   4  10   0    6.22    0.22
  -4  10   0    6.14    0.21
   4  10   0    5.98    0.19
   4  10   0    5.90    0.28
  -5 -10   0    2.14    0.14
   5 -10   0    2.24    0.19
   5 -10   0    2.10    0.17
  -5 -10   0    2.06    0.14
   5 -10   0    1.88    0.18
   5 -10   0    2.12    0.18
  -5 -10   0    2.12    0.20
  -5 -10   0    2.00    0.24
   5  10   0    2.09    0.13
   5  10   0    2.65    0.23
  -5  10   0    2.25    0.15
  -5  10   0    2.13    0.16
   5  10   0    2.13    0.14
   5  10   0    2.56    0.22
   6 -10   0   -0.08    0.10
   6 -10   0    0.12    0.12
  -6 -10   0    0.04    0.12
  -6 -10   0    0.16    0.09
  -6 -10   0    0.20    0.16
   6 -10   0    0.01    0.11
   6  10   0   -0.04    0.08
   6  10   0    0.01    0.12
  -6  10   0   -0.16    0.10
  -6  10   0   -0.11    0.11
   6  10   0   -0.08    0.13
   6  10   0   -0.04    0.10
  -7 -10   0   -0.17    0.11
   7 -10   0    0.19    0.16
  -7 -10   0   -0.37    0.18
  -7 -10   0    0.08    0.12
   7 -10   0    0.32    0.16
   7 -10   0    0.26    0.25
   7 -10   0   -0.11    0.14
  -7 -10   0    0.11    0.18
   7  10   0   -0.06    0.16
  -7  10   0    0.03    0.12
  -7  10   0    0.01    0.14
   7  10   0    0.12    0.13
   7  10   0   -0.05    0.10
   7  10   0    0.04    0.15
   8 -10   0    0.11    0.19
  -8 -10   0   -0.17    0.15
   8 -10   0   -0.23    0.17
  -8 -10   0   -0.12    0.18
  -8 -10   0    0.00    0.24
  -8 -10   0   -0.27    0.13
   8 -10   0    0.07    0.14
   8  10   0   -0.11    0.12
  -8  10   0   -0.16    0.14
   8  10   0    0.05    0.14
   8  10   0   -0.03    0.12
  -8  10   0   -0.14    0.20
   9 -10   0   -0.18    0.22
  -9 -10   0   -0.01    0.16
   9 -10   0    0.08    0.19
  -9 -10   0    0.26    0.19
   9 -10   0    0.16    0.16
   9  10   0    0.00    0.18
  -9  10   0   -0.14    0.18
   9  10   0   -0.25    0.17
  -9  10   0    0.07    0.21
  10 -10   0    0.05    0.26
 -10 -10   0    0.76    0.23
  10 -10   0    0.10    0.24
  10 -10   0    0.00    0.39
 -10  10   0   -0.32    0.14
  10  10   0   -0.25    0.22
   0 -11   0   -0.11    0.09
   0 -11   0   -0.05    0.07
   0  11   0    0.00    0.10
   0  11   0   -0.13    0.11
   0  11   0    0.16    0.09
   0  11   0   -0.11    0.09
   1 -11   0    0.82    0.13
   1 -11   0    0.62    0.12
  -1  11   0    1.01    0.15
   1  11   0    1.01    0.14
  -1  11   0    0.79    0.13
   1  11   0    1.06    0.14
  -1  11   0    0.94    0.15
  -1  11   0    0.78    0.11
   1  11   0    0.69    0.12
   1  11   0    0.64    0.13
   2 -11   0    2.58    0.20
   2 -11   0    2.07    0.18
   2 -11   0    2.33    0.09
   2 -11   0    2.41    0.09
   2  11   0    2.28    0.22
  -2  11   0    2.27    0.21
  -2  11   0    2.19    0.19
   2  11   0    2.85    0.17
   2  11   0    2.50    0.21
   2  11   0    2.47    0.18
   2  11   0    2.61    0.17
   3 -11   0    0.07    0.09
   3 -11   0    0.11    0.06
   3 -11   0    0.03    0.06
   3 -11   0   -0.08    0.12
  -3  11   0    0.00    0.05
  -3  11   0   -0.02    0.04
   3  11   0    0.06    0.13
   3  11   0    0.04    0.09
   3  11   0    0.12    0.10
   4 -11   0    0.36    0.09
   4 -11   0    0.40    0.11
  -4 -11   0    0.38    0.17
   4 -11   0    0.23    0.14
   4 -11   0    0.37    0.08
  -4 -11   0    0.34    0.05
   4  11   0    0.47    0.12
   4  11   0    0.17    0.12
   4  11   0    0.19    0.11
  -4  11   0    0.40    0.08
  -4  11   0    0.32    0.08
   4  11   0    0.28    0.05
   4  11   0    0.29    0.05
   5 -11   0   -0.01    0.10
   5 -11   0    0.01    0.11
   5 -11   0   -0.09    0.10
  -5 -11   0    0.09    0.07
   5 -11   0   -0.14    0.14
  -5 -11   0    0.25    0.18
  -5 -11   0    0.02    0.13
   5  11   0    0.39    0.16
  -5  11   0    0.02    0.09
  -5  11   0    0.01    0.08
   5  11   0    0.00    0.12
   5  11   0   -0.04    0.07
   5  11   0    0.07    0.06
   6 -11   0   -0.20    0.12
  -6 -11   0   -0.19    0.16
  -6 -11   0    0.01    0.19
  -6 -11   0   -0.04    0.10
   6 -11   0    0.00    0.13
   6 -11   0   -0.26    0.14
  -6 -11   0   -0.07    0.10
  -6  11   0   -0.15    0.12
   6  11   0    0.13    0.16
   6  11   0   -0.11    0.09
   6  11   0   -0.14    0.07
  -6  11   0   -0.02    0.11
   6  11   0   -0.14    0.12
  -7 -11   0    0.17    0.18
   7 -11   0    0.05    0.17
   7 -11   0   -0.12    0.12
  -7 -11   0    0.31    0.12
   7 -11   0    0.01    0.17
  -7 -11   0    0.23    0.13
  -7  11   0   -0.05    0.12
   7  11   0    0.32    0.12
  -7  11   0   -0.05    0.14
   7  11   0    0.10    0.11
  -8 -11   0    0.18    0.22
   8 -11   0   -0.01    0.15
  -8 -11   0    0.31    0.14
   8 -11   0   -0.16    0.18
   8 -11   0    0.16    0.20
   8  11   0    0.26    0.17
  -8  11   0    0.20    0.16
   8  11   0   -0.22    0.20
  -8  11   0    0.01    0.18
   8  11   0   -0.07    0.15
  -9 -11   0    0.81    0.24
   9 -11   0    0.31    0.25
   9 -11   0    0.43    0.18
   9 -11   0    0.54    0.24
  -9  11   0    0.35    0.20
   9  11   0    0.36    0.18
 -10 -11   0   -0.16    0.25
  10 -11   0   -0.14    0.26
  10 -11   0   -0.09    0.20
  10  11   0    0.50    0.14
   0 -12   0    2.17    0.19
   0  12   0    1.72    0.20
   0  12   0    1.67    0.21
   0  12   0    1.95    0.23
   0  12   0    1.99    0.23
   1 -12   0    0.79    0.14
   1 -12   0    0.86    0.14
   1  12   0    0.81    0.18
   1  12   0    0.84    0.16
   1  12   0    0.70    0.14
  -1  12   0    0.40    0.15
  -1  12   0    0.58    0.20
  -1  12   0    0.58    0.13
   1  12   0    0.76    0.13
  -1  12   0    0.73    0.15
   2 -12   0   -0.09    0.13
   2 -12   0   -0.12    0.08
   2  12   0    0.13    0.16
   2  12   0   -0.11    0.14
   2  12   0   -0.18    0.10
   2  12   0   -0.17    0.09
  -2  12   0    0.01    0.17
   2  12   0   -0.01    0.11
   3 -12   0    2.17    0.21
   3 -12   0    1.99    0.12
   3 -12   0    2.05    0.11
   3 -12   0    2.14    0.22
  -3  12   0    2.29    0.24
   3  12   0    2.11    0.22
  -3  12   0    2.16    0.10
   3  12   0    2.88    0.27
   3  12   0    2.10    0.18
  -3  12   0    1.70    0.14
   3  12   0    2.33    0.20
   4 -12   0    4.86    0.29
  -4 -12   0    4.60    0.14
  -4 -12   0    4.16    0.12
   4 -12   0    4.61    0.19
   4 -12   0    4.67    0.26
   4 -12   0    4.68    0.28
  -4  12   0    4.71    0.18
   4  12   0    4.83    0.23
  -4  12   0    4.44    0.18
   4  12   0    4.62    0.29
   4  12   0    4.05    0.29
   5 -12   0    0.23    0.17
  -5 -12   0    0.69    0.22
   5 -12   0    0.42    0.12
  -5 -12   0    0.31    0.08
  -5 -12   0    0.46    0.08
   5 -12   0    0.50    0.12
   5 -12   0    0.62    0.16
  -5  12   0    0.55    0.12
  -5  12   0    0.20    0.10
   5  12   0    0.21    0.09
   5  12   0    0.38    0.08
   5  12   0    0.33    0.12
   5  12   0    0.31    0.16
  -6 -12   0    0.13    0.19
   6 -12   0   -0.03    0.14
   6 -12   0    0.22    0.13
   6 -12   0    0.04    0.13
  -6 -12   0    0.06    0.10
   6 -12   0   -0.09    0.16
  -6 -12   0    0.27    0.25
  -6  12   0    0.23    0.11
   6  12   0    0.18    0.10
   6  12   0    0.11    0.08
  -6  12   0    0.03    0.12
   6  12   0    0.16    0.08
   7 -12   0    0.13    0.15
   7 -12   0    0.08    0.19
   7 -12   0   -0.03    0.17
  -7 -12   0   -0.07    0.12
  -7 -12   0   -0.18    0.12
  -7 -12   0    0.07    0.21
   7  12   0    0.00    0.13
  -7  12   0   -0.11    0.13
   7  12   0    0.02    0.11
   7  12   0   -0.25    0.25
  -7  12   0   -0.15    0.14
   8 -12   0    0.24    0.16
   8 -12   0   -0.07    0.23
  -8 -12   0   -0.01    0.22
   8 -12   0   -0.04    0.20
   8  12   0    0.15    0.17
  -8  12   0    0.19    0.17
   9 -12   0    0.01    0.19
  -9 -12   0    0.32    0.26
   9 -12   0    0.32    0.24
   9  12   0    0.54    0.21
   0 -13   0   -0.14    0.11
   0  13   0    0.02    0.14
   0  13   0   -0.08    0.11
   0  13   0    0.06    0.17
   0  13   0    0.02    0.12
   1 -13   0    3.20    0.24
   1  13   0    2.93    0.22
   1  13   0    2.46    0.22
  -1  13   0    2.94    0.24
  -1  13   0    2.96    0.17
   1  13   0    3.01    0.19
   1  13   0    2.85    0.31
  -1  13   0    2.92    0.25
   2 -13   0    0.21    0.14
   2  13   0   -0.17    0.11
  -2  13   0   -0.05    0.17
  -2  13   0    0.05    0.15
   2  13   0   -0.02    0.12
   2  13   0   -0.09    0.10
   3 -13   0    0.63    0.14
   3 -13   0    0.35    0.15
   3 -13   0    0.45    0.06
   3 -13   0    0.39    0.06
   3  13   0    0.41    0.14
   3  13   0    0.56    0.14
   3  13   0    0.56    0.11
   3  13   0    0.42    0.15
  -3  13   0    0.31    0.18
   4 -13   0    1.07    0.11
   4 -13   0    1.07    0.18
   4 -13   0    1.52    0.21
   4 -13   0    1.19    0.17
   4 -13   0    0.99    0.10
  -4  13   0    1.04    0.11
   4  13   0    1.11    0.13
  -4  13   0    1.19    0.12
   4  13   0    1.35    0.17
   5 -13   0    1.15    0.18
   5 -13   0    1.01    0.21
  -5 -13   0    0.74    0.08
   5 -13   0    0.73    0.12
  -5 -13   0    0.72    0.08
   5 -13   0    0.76    0.18
   5 -13   0    0.97    0.13
  -5  13   0    0.75    0.11
   5  13   0    0.71    0.22
  -6 -13   0   -0.07    0.09
   6 -13   0    0.22    0.16
   6 -13   0   -0.16    0.14
   6 -13   0    0.31    0.19
   6 -13   0   -0.15    0.15
  -6 -13   0    0.11    0.10
   6  13   0    0.01    0.10
   6  13   0   -0.12    0.10
  -6  13   0    0.21    0.13
  -6  13   0    0.00    0.12
   7 -13   0   -0.30    0.15
   7 -13   0    0.02    0.19
  -7 -13   0   -0.11    0.15
   7 -13   0   -0.16    0.20
  -7 -13   0   -0.42    0.21
   7  13   0    0.14    0.14
   7  13   0    0.31    0.12
  -7  13   0   -0.06    0.13
   8 -13   0    0.26    0.20
  -8 -13   0    0.78    0.27
   8 -13   0    0.74    0.27
   8  13   0    0.50    0.18
  -8  13   0    0.27    0.18
  -9 -13   0   -0.42    0.29
   9 -13   0    0.50    0.23
   9 -13   0   -0.45    0.28
   9  13   0    0.24    0.22
   0  14   0    0.27    0.17
   0  14   0    0.49    0.17
   0  14   0    0.54    0.19
   0  14   0    0.50    0.20
   1 -14   0    0.07    0.15
   1 -14   0    0.05    0.12
  -1  14   0    0.11    0.14
   1  14   0    0.10    0.16
   1  14   0    0.36    0.16
  -1  14   0    0.09    0.18
  -1  14   0   -0.09    0.16
   1  14   0    0.04    0.17
   1  14   0   -0.11    0.19
   2 -14   0    0.10    0.16
   2 -14   0    0.12    0.14
   2  14   0    0.11    0.23
  -2  14   0    0.06    0.19
  -2  14   0    0.06    0.18
   2  14   0   -0.05    0.16
   2  14   0   -0.02    0.15
   3 -14   0   -0.11    0.14
   3 -14   0    0.01    0.17
   3  14   0   -0.19    0.16
  -3  14   0   -0.01    0.21
   3  14   0    0.29    0.15
   4 -14   0   -0.17    0.08
   4 -14   0    0.17    0.08
   4 -14   0   -0.03    0.15
   4 -14   0    0.01    0.18
  -4  14   0    0.05    0.06
   4  14   0    0.00    0.15
   4  14   0   -0.04    0.25
  -4  14   0    0.47    0.23
  -4  14   0    0.02    0.07
   5 -14   0   -0.09    0.19
   5 -14   0    0.24    0.12
   5 -14   0    0.24    0.19
   5 -14   0    0.38    0.17
  -5  14   0    0.09    0.11
  -5  14   0    0.08    0.10
   6 -14   0    0.19    0.19
  -6 -14   0    0.09    0.07
   6 -14   0    0.64    0.19
   6 -14   0   -0.10    0.23
   6 -14   0    0.55    0.25
  -6  14   0    0.44    0.13
   7 -14   0    0.53    0.21
   7 -14   0   -0.21    0.25
  -7 -14   0   -0.05    0.19
  -7  14   0    0.41    0.16
   8 -14   0    0.57    0.23
   8 -14   0    0.33    0.28
   8  14   0    0.14    0.18
  -8  14   0    0.14    0.19
   0  15   0    0.24    0.22
   0  15   0    0.08    0.20
   1 -15   0    0.45    0.18
   1  15   0    0.33    0.21
   1  15   0    0.36    0.21
  -1  15   0    0.15    0.20
  -1  15   0    0.11    0.20
   2 -15   0    0.27    0.15
   2 -15   0   -0.09    0.16
  -2  15   0    0.09    0.25
   2  15   0    0.17    0.23
   2  15   0   -0.14    0.18
   3 -15   0   -0.20    0.19
   3 -15   0    0.05    0.14
   3  15   0    0.10    0.17
  -3  15   0    0.07    0.24
   4 -15   0    0.05    0.07
   4 -15   0   -0.15    0.07
   4 -15   0   -0.13    0.19
   4 -15   0    0.03    0.16
  -4  15   0   -0.14    0.24
   4  15   0    0.38    0.21
   4  15   0   -0.06    0.22
   5 -15   0    0.32    0.22
   5 -15   0    0.39    0.12
   5 -15   0   -0.05    0.18
   5  15   0    0.18    0.23
  -5  15   0    0.35    0.27
  -5  15   0    0.64    0.10
   6 -15   0    0.15    0.25
   6 -15   0    0.25    0.21
  -6  15   0    0.11    0.12
   7 -15   0   -0.18    0.23
   7 -15   0    0.22    0.28
  -7  15   0    0.11    0.16
   0  16   0    0.68    0.23
  -1  16   0    0.34    0.23
   1  16   0   -0.01    0.21
   2 -16   0    0.12    0.21
   2 -16   0   -0.33    0.15
  -2  16   0    0.00    0.28
   3 -16   0    0.07    0.20
   3 -16   0   -0.05    0.18
  -3  16   0    0.06    0.25
   4 -16   0    0.19    0.24
   4 -16   0    0.70    0.20
  -4  16   0   -0.15    0.22
   5 -16   0   -0.14    0.21
   5 -16   0    0.05    0.25
  -5  16   0   -0.08    0.16
   5  16   0   -0.08    0.25
   6 -16   0    0.00    0.22
   6 -16   0    0.29    0.47
  -6  16   0    0.16    0.12
  -6  16   0   -0.29    0.34
   6  16   0    0.36    0.29
   0  17   0   -0.22    0.25
  -1  17   0    0.18    0.25
   1  17   0    0.38    0.27
   2 -17   0   -0.36    0.22
  -2  17   0   -0.03    0.17
   3 -17   0    0.20    0.26
   3 -17   0    0.98    0.26
   4 -17   0    0.21    0.23
   4 -17   0   -0.70    0.45
  -4  17   0    0.07    0.20
   0  18   0    0.52    0.14
   1  18   0    0.06    0.13
  13   0  -1    0.10    0.37
 -12   0   1   -0.23    0.23
  12   0  -1   -0.01    0.25
 -11   0   1    0.25    0.20
  11   0  -1   -0.11    0.24
 -10   0   1    0.20    0.17
  10   0  -1   -0.05    0.18
 -10   0   1    0.10    0.18
  10   0  -1   -0.07    0.15
  -9   0   1    0.26    0.14
  -9   0   1    0.17    0.19
   9   0  -1    0.41    0.19
   9   0  -1   -0.03    0.13
   8   0  -1   -0.03    0.10
  -8   0   1    0.12    0.10
  -8   0   1    0.18    0.10
   8   0  -1    0.05    0.10
  -7   0   1   -0.03    0.09
  -7   0   1   -0.03    0.09
   7   0  -1    0.09    0.09
   7   0  -1    0.07    0.10
   6   0  -1    0.06    0.07
  -6   0   1   -0.03    0.05
  -6   0   1   -0.03    0.07
   6   0  -1   -0.04    0.07
   5   0  -1   -0.06    0.06
  -5   0   1   -0.08    0.05
  -5   0   1   -0.03    0.05
   5   0  -1   -0.06    0.05
  -4   0   1   -0.02    0.04
   4   0  -1   -0.02    0.04
  -4   0   1   -0.02    0.04
   4   0  -1    0.01    0.04
  -3   0   1   -0.08    0.03
   3   0  -1   -0.06    0.03
  -3   0   1   -0.08    0.03
   3   0  -1   -0.01    0.03
   2   0  -1    0.02    0.03
  -2   0   1    0.06    0.03
  -2   0   1    0.08    0.03
   2   0  -1    0.04    0.03
  -1   0  -1    0.02    0.01
  -1   0  -1    0.01    0.01
   1   0   1   -0.01    0.01
   1   0   1    0.01    0.01
  -2   0  -1   -0.04    0.02
   2   0   1   -0.03    0.02
   2   0   1   -0.02    0.02
   3   0   1   -0.03    0.04
  -3   0  -1   -0.02    0.03
   3   0   1   -0.03    0.03
  -3   0  -1   -0.04    0.03
  -4   0  -1   -0.05    0.04
   4   0   1   -0.04    0.04
  -4   0  -1   -0.01    0.04
   4   0   1   -0.02    0.04
  -5   0  -1    0.01    0.06
  -5   0  -1   -0.03    0.05
   5   0   1   -0.08    0.05
   5   0   1   -0.05    0.05
   6   0   1    0.02    0.07
  -6   0  -1    0.03    0.07
   6   0   1    0.08    0.08
  -6   0  -1   -0.09    0.06
  -7   0  -1   -0.19    0.08
   7   0   1    0.06    0.09
   7   0   1    0.02    0.09
  -7   0  -1    0.04    0.08
   8   0   1   -0.04    0.12
  -8   0  -1   -0.06    0.11
  -8   0  -1    0.05    0.11
   8   0   1   -0.04    0.10
  -9   0  -1    0.01    0.17
   9   0   1   -0.15    0.13
  -9   0  -1    0.12    0.16
   9   0   1    0.05    0.19
  10   0   1   -0.09    0.18
 -10   0  -1   -0.08    0.19
  10   0   1   -0.24    0.16
 -10   0  -1   -0.03    0.20
  11   0   1    0.42    0.24
 -11   0  -1   -0.42    0.20
  12   0   1   -0.49    0.27
 -12   0  -1    0.12    0.27
  13  -1  -1   -0.84    0.32
  13   1  -1    0.22    0.43
 -12  -1   1   -0.27    0.21
  12  -1  -1    0.19    0.27
 -12   1   1   -0.18    0.25
  12   1  -1   -0.12    0.22
 -11  -1   1    0.26    0.20
  11  -1  -1    0.18    0.23
 -11   1   1    0.40    0.18
  11   1  -1    0.25    0.21
  11   1  -1    0.14    0.24
  10  -1  -1   -0.02    0.16
  10  -1  -1   -0.28    0.18
  10   1  -1    0.35    0.16
  10   1  -1    0.01    0.16
 -10   1   1    0.31    0.19
 -10   1   1    0.24    0.15
   9  -1  -1    2.43    0.28
  -9  -1   1    2.70    0.26
  -9  -1   1    2.83    0.26
   9  -1  -1    2.29    0.24
   9   1  -1    1.99    0.22
   9   1  -1    2.32    0.25
  -9   1   1    2.90    0.25
  -9   1   1    2.15    0.25
   8  -1  -1    0.70    0.13
  -8  -1   1    0.59    0.12
  -8  -1   1    0.69    0.14
   8  -1  -1    0.58    0.13
   8   1  -1    0.77    0.13
  -8   1   1    0.67    0.14
   8   1  -1    0.61    0.14
  -8   1   1    0.52    0.13
   7  -1  -1    5.84    0.24
  -7  -1   1    6.13    0.24
  -7  -1   1    6.27    0.25
   7  -1  -1    5.91    0.25
   7   1  -1    6.36    0.25
   7   1  -1    5.99    0.25
  -7   1   1    6.09    0.25
  -7   1   1    5.98    0.26
  -6  -1   1    5.02    0.25
   6  -1  -1    6.18    0.23
   6  -1  -1    6.55    0.24
  -6  -1   1    6.21    0.22
  -6   1   1    6.24    0.23
  -6   1   1    6.12    0.23
   6   1  -1    6.55    0.24
   6   1  -1    6.04    0.22
  -5  -1   1    0.12    0.06
   5  -1  -1    0.00    0.05
   5  -1  -1   -0.01    0.06
  -5  -1   1   -0.01    0.05
   5   1  -1   -0.03    0.05
  -5   1   1    0.01    0.05
  -5   1   1    0.01    0.05
   5   1  -1    0.04    0.05
   4  -1  -1   -0.02    0.05
  -4  -1   1   -0.06    0.04
  -4  -1   1    0.02    0.04
   4  -1  -1   -0.04    0.04
  -4   1   1   -0.04    0.04
  -4   1   1    0.01    0.04
   4   1  -1   -0.03    0.04
   4   1  -1   -0.03    0.04
  -3  -1   1   11.05    0.29
   3  -1  -1   10.90    0.29
  -3  -1   1   10.98    0.29
   3  -1  -1   11.70    0.29
   3   1  -1   10.79    0.29
  -3   1   1   11.41    0.29
   3   1  -1   11.19    0.29
  -3   1   1   11.09    0.29
  -2  -1   1   24.16    0.55
   2  -1  -1   23.85    0.55
  -2  -1   1   23.82    0.55
  -2   1   1   24.10    0.55
   2   1  -1   23.63    0.55
  -2   1   1   23.76    0.55
   2   1  -1   23.12    0.55
   1  -1  -1   66.31    1.47
  -1  -1   1   64.42    1.46
   1  -1  -1   62.46    1.43
  -1  -1   1   61.10    1.44
   1   1  -1   64.72    1.46
  -1   1   1   67.04    1.47
  -1   1   1   62.24    1.44
  -1  -1  -1    5.15    0.13
  -1  -1  -1    5.12    0.13
   1  -1   1    5.25    0.13
   1  -1   1    5.13    0.13
   1   1   1    5.29    0.13
  -1   1  -1    5.30    0.13
   1   1   1    5.20    0.13
  -1   1  -1    5.22    0.13
  -2  -1  -1   72.99    1.78
  -2  -1  -1   85.94    1.82
   2  -1   1   79.15    1.76
   2   1   1   78.30    1.76
   2   1   1   76.96    1.76
  -2   1  -1   80.19    1.77
   3  -1   1    3.32    0.11
  -3  -1  -1    3.22    0.12
   3  -1   1    3.21    0.12
  -3  -1  -1    3.09    0.11
  -3   1  -1    3.22    0.12
   3   1   1    3.26    0.11
   3   1   1    3.07    0.12
  -3   1  -1    3.10    0.11
   4  -1   1    0.07    0.05
  -4  -1  -1    0.08    0.04
   4  -1   1    0.07    0.05
  -4  -1  -1    0.14    0.04
  -4   1  -1    0.12    0.04
  -4   1  -1    0.11    0.04
   4   1   1    0.18    0.05
   4   1   1    0.11    0.04
   5  -1   1    3.33    0.15
  -5  -1  -1    3.46    0.15
   5  -1   1    3.57    0.16
  -5  -1  -1    3.84    0.16
  -5   1  -1    3.35    0.15
  -5   1  -1    3.68    0.16
   5   1   1    3.52    0.15
   5   1   1    3.63    0.15
   6  -1   1    0.73    0.11
  -6  -1  -1    0.65    0.09
  -6  -1  -1    0.59    0.09
   6  -1   1    0.63    0.12
  -6   1  -1    0.70    0.09
   6   1   1    0.53    0.09
   6   1   1    0.50    0.09
  -6   1  -1    0.55    0.08
   7  -1   1    6.14    0.25
  -7  -1  -1    6.21    0.24
  -7  -1  -1    5.81    0.24
   7  -1   1    5.94    0.24
   7   1   1    5.90    0.24
  -7   1  -1    6.01    0.25
   7   1   1    6.15    0.26
  -7   1  -1    5.84    0.24
  -8  -1  -1    0.07    0.10
   8  -1   1    0.00    0.12
   8  -1   1    0.09    0.11
  -8  -1  -1    0.00    0.10
  -8   1  -1   -0.23    0.12
  -8   1  -1    0.04    0.10
   8   1   1    0.00    0.12
   8   1   1   -0.07    0.10
   9  -1   1    1.42    0.17
  -9  -1  -1    1.66    0.20
  -9  -1  -1    1.42    0.20
   9  -1   1    1.64    0.21
   9   1   1    1.57    0.30
  -9   1  -1    1.76    0.20
   9   1   1    1.83    0.21
  -9   1  -1    1.16    0.19
  10  -1   1    1.48    0.22
 -10  -1  -1    1.41    0.24
  10  -1   1    1.28    0.21
 -10   1  -1    1.36    0.20
  10   1   1    1.27    0.21
  10   1   1    1.15    0.21
 -10   1  -1    1.20    0.23
  11  -1   1    0.17    0.30
 -11  -1  -1   -0.13    0.22
  11   1   1    0.09    0.24
 -11   1  -1    0.05    0.22
  11   1   1    0.29    0.23
 -12  -1  -1    0.39    0.24
  12  -1   1   -0.25    0.31
 -12   1  -1    0.30    0.23
  12   1   1   -0.02    0.21
 -12  -2   1   -0.27    0.26
  12  -2  -1    0.17    0.30
 -12   2   1   -0.41    0.21
  12   2  -1    0.02    0.14
  11  -2  -1    0.61    0.26
 -11  -2   1    0.59    0.20
  11   2  -1    0.65    0.25
 -11   2   1    0.26    0.18
  11   2  -1    0.55    0.22
 -10  -2   1    0.25    0.18
  10  -2  -1    0.18    0.22
 -10  -2   1    0.19    0.19
  10  -2  -1   -0.10    0.18
  10   2  -1   -0.31    0.18
  10   2  -1    0.30    0.18
 -10   2   1    0.00    0.15
 -10   2   1    0.20    0.16
   9  -2  -1    2.15    0.25
   9  -2  -1    2.15    0.26
  -9  -2   1    1.94    0.22
  -9  -2   1    1.75    0.21
  -9   2   1    2.01    0.23
   9   2  -1    1.83    0.20
   9   2  -1    1.39    0.31
  -9   2   1    2.10    0.22
   8  -2  -1    2.08    0.20
   8  -2  -1    2.10    0.18
  -8  -2   1    2.10    0.20
  -8  -2   1    2.16    0.19
  -8   2   1    2.18    0.19
   8   2  -1    2.32    0.21
   8   2  -1    2.13    0.19
  -8   2   1    2.75    0.19
   7  -2  -1    0.69    0.11
   7  -2  -1    0.54    0.11
  -7  -2   1    0.69    0.10
  -7  -2   1    0.74    0.10
   7   2  -1    0.57    0.10
  -7   2   1    0.64    0.11
  -7   2   1    0.70    0.11
   7   2  -1    0.66    0.12
  -6  -2   1   -0.04    0.06
   6  -2  -1   -0.13    0.07
   6  -2  -1   -0.09    0.06
  -6  -2   1    0.00    0.07
   6   2  -1   -0.03    0.07
  -6   2   1   -0.02    0.08
  -6   2   1    0.01    0.06
   6   2  -1    0.00    0.06
   5  -2  -1    2.26    0.14
  -5  -2   1    2.07    0.12
   5  -2  -1    1.81    0.12
  -5  -2   1    2.16    0.13
  -5   2   1    1.81    0.12
   5   2  -1    1.93    0.12
  -5   2   1    2.03    0.12
   5   2  -1    2.09    0.12
   4  -2  -1    6.02    0.19
  -4  -2   1    6.04    0.20
  -4  -2   1    6.01    0.19
   4  -2  -1    6.27    0.20
  -4   2   1    6.07    0.20
  -4   2   1    6.07    0.20
   4   2  -1    6.17    0.19
   4   2  -1    6.17    0.20
   3  -2  -1   15.09    0.38
  -3  -2   1   15.20    0.38
   3  -2  -1   15.38    0.38
  -3  -2   1   15.01    0.38
   3   2  -1   15.11    0.38
  -3   2   1   15.47    0.38
   3   2  -1   14.93    0.38
  -3   2   1   15.16    0.38
   2  -2  -1   41.60    0.95
  -2  -2   1   41.93    0.95
  -2  -2   1   40.95    0.94
  -2  -2   1   42.79    0.95
   2  -2  -1   42.05    0.96
  -2   2   1   42.65    0.96
   2   2  -1   41.30    0.95
   2   2  -1   42.46    0.95
  -2   2   1   42.04    0.95
   1  -2  -1  143.21    3.20
  -1  -2   1  139.88    3.19
   1  -2  -1  135.31    3.24
  -1  -2   1  141.73    3.20
   1  -2  -1  146.17    3.20
   1   2  -1  138.67    3.20
   1   2  -1  143.91    3.19
  -1   2   1  148.86    3.23
   1   2  -1  138.35    3.20
   1   2  -1  144.09    3.19
   0  -2   1   50.82    1.12
   0  -2   1   50.89    1.15
   0  -2  -1   46.77    1.12
   0  -2  -1   51.46    1.12
   0  -2  -1   51.78    1.16
   0   2  -1   51.86    1.15
   0   2  -1   52.16    1.12
   0   2   1   48.41    1.12
   0   2   1   45.12    1.12
   0   2   1   51.33    1.12
   0   2  -1   51.05    1.13
   0   2  -1   51.04    1.12
   0   2  -1   46.39    1.12
   0   2   1   46.43    1.11
   0   2  -1   51.89    1.16
   0   2   1   51.50    1.12
   1  -2   1    4.82    0.13
  -1  -2  -1    4.60    0.12
   1  -2   1    5.09    0.13
  -1  -2  -1    5.07    0.12
   1  -2   1    4.76    0.13
  -1  -2  -1    4.89    0.12
   1   2   1    4.70    0.12
  -1   2  -1    4.99    0.13
  -1   2  -1    5.00    0.13
   1   2   1    5.18    0.13
   1   2   1    4.81    0.12
   1   2   1    5.11    0.12
  -2  -2  -1   25.97    0.60
   2  -2   1   24.36    0.60
  -2  -2  -1   26.21    0.60
   2  -2   1   26.34    0.60
  -2   2  -1   26.47    0.60
   2   2   1   25.40    0.60
  -2   2  -1   25.72    0.60
   2   2   1   25.88    0.60
  -3  -2  -1    0.05    0.03
  -3  -2  -1    0.08    0.03
   3  -2   1    0.03    0.03
   3  -2   1    0.05    0.04
  -3   2  -1    0.04    0.03
  -3   2  -1    0.09    0.04
   3   2   1    0.02    0.03
   3   2   1    0.06    0.03
  -4  -2  -1   19.37    0.48
   4  -2   1   19.74    0.49
  -4  -2  -1   18.98    0.48
   4  -2   1   19.43    0.49
   4   2   1   19.54    0.48
   4   2   1   19.18    0.49
  -4   2  -1   19.23    0.48
  -4   2  -1   19.07    0.49
  -5  -2  -1    7.69    0.24
   5  -2   1    7.76    0.25
   5  -2   1    7.60    0.25
  -5  -2  -1    7.41    0.24
  -5   2  -1    7.90    0.25
  -5   2  -1    7.36    0.24
   5   2   1    7.56    0.24
   5   2   1    7.41    0.25
  -6  -2  -1    1.55    0.12
   6  -2   1    1.61    0.14
  -6  -2  -1    1.41    0.12
   6  -2   1    1.54    0.13
  -6   2  -1    1.61    0.12
   6   2   1    1.73    0.13
   6   2   1    1.45    0.12
  -6   2  -1    1.60    0.13
   7  -2   1    4.44    0.22
  -7  -2  -1    5.09    0.23
   7  -2   1    4.98    0.23
  -7  -2  -1    4.22    0.21
   7   2   1    4.53    0.22
  -7   2  -1    4.69    0.23
  -7   2  -1    4.67    0.21
   8  -2   1   -0.09    0.11
  -8  -2  -1   -0.02    0.11
  -8  -2  -1   -0.17    0.09
   8  -2   1    0.04    0.10
   8   2   1    0.01    0.14
   8   2   1    0.04    0.11
  -8   2  -1    0.02    0.10
  -8   2  -1   -0.14    0.10
  -9  -2  -1    0.76    0.16
   9  -2   1    0.87    0.16
  -9  -2  -1    1.05    0.18
   9  -2   1    0.94    0.24
  -9   2  -1    0.91    0.18
  -9   2  -1    0.79    0.19
   9   2   1    0.83    0.17
   9   2   1    0.62    0.18
 -10  -2  -1    0.61    0.21
 -10  -2  -1    0.42    0.19
  10  -2   1    0.39    0.20
  10  -2   1    0.42    0.22
  10   2   1    0.15    0.18
  10   2   1    0.60    0.20
 -10   2  -1    0.82    0.21
 -10   2  -1    0.41    0.17
 -11  -2  -1    0.03    0.19
  11  -2   1   -0.02    0.22
  11   2   1    0.31    0.25
  11   2   1   -0.11    0.21
 -11   2  -1   -0.09    0.18
  12  -2   1    0.35    0.27
 -12  -2  -1    0.46    0.23
 -12   2  -1    0.16    0.24
  12   2   1    0.26    0.16
  12  -3  -1   -0.06    0.31
 -12  -3   1    0.17    0.29
  12   3  -1    0.22    0.16
 -11  -3   1    0.00    0.17
  11  -3  -1    0.24    0.27
  11   3  -1   -0.05    0.20
  11   3  -1    0.24    0.18
 -11   3   1   -0.31    0.16
  10  -3  -1   -0.06    0.16
  10  -3  -1    0.00    0.21
 -10  -3   1    0.16    0.20
 -10   3   1   -0.01    0.20
  10   3  -1   -0.02    0.18
  10   3  -1    0.07    0.17
 -10   3   1    0.25    0.17
  -9  -3   1   -0.24    0.14
  -9  -3   1   -0.03    0.12
   9  -3  -1    0.03    0.20
   9  -3  -1   -0.05    0.13
   9   3  -1    0.10    0.13
  -9   3   1    0.17    0.15
  -9   3   1    0.19    0.15
   9   3  -1   -0.01    0.14
  -8  -3   1   -0.03    0.10
   8  -3  -1   -0.11    0.13
  -8  -3   1    0.04    0.10
   8  -3  -1    0.10    0.11
   8   3  -1    0.04    0.16
  -8   3   1    0.10    0.14
   8   3  -1    0.08    0.11
  -8   3   1    0.11    0.11
   7  -3  -1    0.29    0.11
   7  -3  -1    0.07    0.09
  -7  -3   1    0.22    0.09
  -7  -3   1    0.12    0.08
  -7   3   1    0.17    0.09
   7   3  -1    0.23    0.10
   7   3  -1    0.11    0.09
  -7   3   1    0.20    0.09
   6  -3  -1    5.11    0.21
  -6  -3   1    5.06    0.20
  -6  -3   1    5.18    0.21
   6  -3  -1    5.25    0.21
   6   3  -1    4.95    0.20
   6   3  -1    5.25    0.21
  -6   3   1    5.12    0.21
  -6   3   1    4.88    0.20
  -5  -3   1    0.18    0.07
   5  -3  -1    0.14    0.07
  -5  -3   1    0.23    0.06
   5  -3  -1    0.18    0.06
   5   3  -1    0.22    0.07
   5   3  -1    0.23    0.06
  -5   3   1    0.20    0.06
  -5   3   1    0.29    0.07
  -4  -3   1    2.13    0.10
   4  -3  -1    1.95    0.11
   4  -3  -1    1.96    0.11
  -4  -3   1    2.06    0.10
  -4   3   1    1.88    0.11
   4   3  -1    1.94    0.10
   4   3  -1    1.93    0.10
  -4   3   1    1.97    0.10
   3  -3  -1    4.43    0.15
   3  -3  -1    4.40    0.14
  -3  -3   1    4.37    0.14
  -3  -3   1    4.39    0.13
  -3   3   1    4.49    0.14
   3   3  -1    4.39    0.14
  -3   3   1    4.34    0.15
   3   3  -1    4.47    0.14
  -2  -3   1   14.45    0.35
  -2  -3   1   14.78    0.35
   2  -3  -1   14.33    0.35
  -2  -3   1   14.48    0.35
   2  -3  -1   14.35    0.35
  -2  -3   1   14.55    0.35
   2   3  -1   14.21    0.34
  -2   3   1   14.54    0.35
   2   3  -1   14.37    0.35
  -2   3   1   15.17    0.35
   2   3  -1   14.37    0.35
  -1  -3   1   30.92    0.71
   1  -3  -1   30.98    0.72
   1  -3  -1   30.66    0.71
  -1  -3   1   30.67    0.69
  -1  -3   1   30.88    0.71
   1  -3  -1   31.03    0.70
   1   3  -1   30.67    0.70
  -1   3   1   31.07    0.71
  -1   3   1   30.33    0.70
   1   3  -1   30.64    0.69
   1   3  -1   31.57    0.73
   1   3  -1   31.22    0.71
  -1   3   1   31.01    0.70
   0  -3  -1   31.69    0.71
   0  -3   1   31.52    0.70
   0  -3   1   31.27    0.72
   0  -3  -1   31.46    0.73
   0  -3  -1   31.50    0.72
   0  -3   1   32.85    0.70
   0  -3  -1   30.75    0.70
   0  -3   1   32.19    0.74
   0   3  -1   30.44    0.70
   0   3   1   33.07    0.70
   0   3   1   31.86    0.72
   0   3  -1   30.56    0.72
   0   3  -1   31.24    0.73
   0   3   1   31.13    0.73
   0   3   1   32.01    0.71
   0   3  -1   33.23    0.70
   0   3   1   30.53    0.71
   0   3   1   31.20    0.73
   0   3  -1   31.74    0.72
   1  -3   1    0.65    0.05
   1  -3   1    0.61    0.04
  -1  -3  -1    0.71    0.04
  -1  -3  -1    0.63    0.03
  -1  -3  -1    0.66    0.05
   1  -3   1    0.73    0.05
  -1   3  -1    0.77    0.05
   1   3   1    0.77    0.05
  -1   3  -1    0.57    0.04
  -1   3  -1    0.59    0.04
   1   3   1    0.64    0.05
   1   3   1    0.65    0.03
  -2  -3  -1   37.06    0.84
  -2  -3  -1   36.80    0.84
   2  -3   1   37.33    0.85
   2  -3   1   36.85    0.85
  -2  -3  -1   35.69    0.83
   2  -3   1   37.69    0.85
   2   3   1   38.02    0.84
   2   3   1   36.32    0.84
  -2   3  -1   36.68    0.85
  -2   3  -1   37.36    0.85
   3  -3   1    5.01    0.16
   3  -3   1    4.92    0.15
  -3  -3  -1    4.64    0.15
  -3  -3  -1    4.40    0.16
  -3  -3  -1    4.74    0.13
  -3   3  -1    5.03    0.15
   3   3   1    4.82    0.15
   3   3   1    4.85    0.15
  -3   3  -1    4.91    0.15
  -4  -3  -1    7.82    0.23
  -4  -3  -1    7.86    0.23
   4  -3   1    7.98    0.24
   4  -3   1    7.81    0.24
  -4   3  -1    7.93    0.24
  -4   3  -1    8.09    0.24
   4   3   1    8.11    0.23
   4   3   1    7.68    0.23
  -5  -3  -1    1.35    0.11
   5  -3   1    1.27    0.11
   5  -3   1    1.28    0.11
  -5  -3  -1    1.15    0.10
   5   3   1    1.26    0.11
  -5   3  -1    1.26    0.10
  -5   3  -1    1.21    0.11
   5   3   1    1.22    0.10
  -6  -3  -1    0.37    0.09
  -6  -3  -1    0.41    0.08
   6  -3   1    0.57    0.10
   6  -3   1    0.43    0.08
  -6   3  -1    0.45    0.08
   6   3   1    0.46    0.08
  -6   3  -1    0.79    0.10
   6   3   1    0.60    0.10
   7  -3   1    0.14    0.11
   7  -3   1   -0.06    0.08
  -7  -3  -1    0.09    0.09
  -7  -3  -1    0.20    0.09
   7   3   1    0.09    0.09
  -7   3  -1    0.01    0.10
   7   3   1    0.10    0.08
  -7   3  -1    0.11    0.08
   8  -3   1   -0.01    0.12
   8  -3   1   -0.11    0.10
  -8  -3  -1   -0.12    0.11
  -8  -3  -1   -0.03    0.10
   8   3   1    0.03    0.15
   8   3   1    0.23    0.12
  -8   3  -1   -0.08    0.14
  -8   3  -1   -0.18    0.12
   9  -3   1   -0.13    0.21
  -9  -3  -1    0.20    0.15
  -9  -3  -1   -0.12    0.13
   9  -3   1    0.06    0.15
  -9   3  -1    0.06    0.13
   9   3   1   -0.18    0.14
  -9   3  -1    0.04    0.15
   9   3   1   -0.16    0.16
 -10  -3  -1   -0.04    0.21
  10  -3   1    0.24    0.21
  10  -3   1   -0.08    0.24
 -10   3  -1    0.45    0.19
  10   3   1    0.10    0.19
 -10   3  -1   -0.01    0.17
 -11  -3  -1    0.42    0.22
  11  -3   1   -0.12    0.25
 -11   3  -1    0.08    0.17
  11   3   1   -0.33    0.23
  11   3   1   -0.23    0.20
  12  -3   1    0.05    0.28
 -12  -3  -1    0.31    0.26
  12   3   1   -0.45    0.16
 -12   3  -1   -0.17    0.14
 -12  -4   1    0.27    0.28
  12  -4  -1    0.26    0.33
  12   4  -1    0.50    0.16
  11  -4  -1   -0.01    0.27
 -11  -4   1    0.07    0.24
 -11   4   1    0.00    0.18
  11   4  -1   -0.10    0.23
  11   4  -1    0.22    0.23
 -10  -4   1    0.87    0.24
  10  -4  -1    0.34    0.20
  10   4  -1    0.20    0.19
 -10   4   1    0.10    0.20
  10   4  -1    0.50    0.17
 -10   4   1    0.28    0.16
   9  -4  -1    0.29    0.15
   9  -4  -1    0.44    0.20
  -9  -4   1    0.04    0.14
  -9  -4   1    0.62    0.17
  -9   4   1    0.32    0.15
  -9   4   1    0.66    0.15
   9   4  -1    0.10    0.14
   9   4  -1    0.02    0.15
  -8  -4   1    1.76    0.18
   8  -4  -1    1.83    0.19
   8  -4  -1    1.60    0.19
  -8  -4   1    1.84    0.20
   8   4  -1    1.65    0.21
   8   4  -1    1.64    0.18
  -8   4   1    1.82    0.20
  -8   4   1    1.72    0.20
  -7  -4   1    4.19    0.20
   7  -4  -1    3.69    0.20
   7  -4  -1    4.21    0.24
  -7  -4   1    3.80    0.20
  -7   4   1    3.99    0.20
   7   4  -1    3.85    0.20
   7   4  -1    3.87    0.21
  -7   4   1    3.85    0.25
  -6  -4   1    1.31    0.12
  -6  -4   1    1.31    0.13
   6  -4  -1    1.52    0.14
   6  -4  -1    1.12    0.12
   6   4  -1    1.18    0.13
  -6   4   1    1.16    0.13
   6   4  -1    1.24    0.13
  -6   4   1    1.13    0.11
   5  -4  -1    0.40    0.08
  -5  -4   1    0.45    0.07
   5  -4  -1    0.55    0.08
  -5  -4   1    0.43    0.07
  -5  -4   1    0.42    0.06
   5   4  -1    0.51    0.08
  -5   4   1    0.39    0.07
   5   4  -1    0.43    0.07
  -5   4   1    0.49    0.08
  -4  -4   1    0.12    0.04
  -4  -4   1    0.05    0.05
   4  -4  -1    0.05    0.05
  -4  -4   1    0.07    0.04
   4  -4  -1    0.11    0.04
  -4   4   1    0.01    0.05
   4   4  -1    0.11    0.05
   4   4  -1    0.06    0.04
  -4   4   1   -0.01    0.04
  -3  -4   1    5.56    0.17
  -3  -4   1    5.65    0.16
   3  -4  -1    5.53    0.17
  -3  -4   1    5.44    0.16
   3  -4  -1    5.49    0.17
  -3  -4   1    5.29    0.17
  -3   4   1    5.63    0.17
   3   4  -1    5.63    0.16
  -3   4   1    5.58    0.17
   3   4  -1    5.48    0.17
   2  -4  -1    0.27    0.04
  -2  -4   1    0.22    0.03
   2  -4  -1    0.28    0.05
   2  -4  -1    0.29    0.04
  -2  -4   1    0.23    0.04
  -2  -4   1    0.23    0.03
  -2  -4   1    0.25    0.04
   2  -4  -1    0.28    0.04
  -2   4   1    0.23    0.03
  -2   4   1    0.28    0.04
   2   4  -1    0.28    0.03
   2   4  -1    0.22    0.03
   2   4  -1    0.24    0.04
   1  -4  -1   56.52    1.28
   1  -4  -1   56.33    1.31
   1  -4  -1   57.19    1.30
  -1  -4   1   57.64    1.30
  -1  -4   1   58.23    1.27
  -1  -4   1   58.45    1.28
  -1  -4   1   56.21    1.29
   1   4  -1   53.51    1.29
  -1   4   1   58.15    1.31
  -1   4   1   57.51    1.28
   1   4  -1   59.24    1.28
  -1   4   1   58.24    1.30
   1   4  -1   56.55    1.30
   1   4  -1   58.61    1.30
  -1   4   1   56.14    1.28
   1   4  -1   56.91    1.29
   1   4  -1   56.73    1.32
   0  -4  -1    1.37    0.04
   0  -4  -1    1.34    0.07
   0  -4   1    1.31    0.07
   0  -4   1    1.32    0.08
   0  -4  -1    1.37    0.07
   0  -4  -1    1.42    0.04
   0   4  -1    1.28    0.07
   0   4   1    1.33    0.07
   0   4  -1    1.39    0.07
   0   4   1    1.36    0.07
   0   4  -1    1.38    0.07
   0   4   1    1.43    0.04
   0   4   1    1.43    0.07
   0   4  -1    1.38    0.06
  -1  -4  -1    2.10    0.08
  -1  -4  -1    2.10    0.09
  -1  -4  -1    2.01    0.06
   1  -4   1    2.11    0.07
   1  -4   1    2.08    0.09
  -1  -4  -1    2.03    0.08
   1  -4   1    2.05    0.09
   1   4   1    2.15    0.09
   1   4   1    2.11    0.09
   1   4   1    2.08    0.06
  -1   4  -1    1.99    0.09
   1   4   1    2.15    0.09
   1   4   1    2.07    0.08
  -1   4  -1    2.11    0.07
   1   4   1    2.09    0.06
  -1   4  -1    2.10    0.07
  -2  -4  -1    3.34    0.11
   2  -4   1    3.47    0.11
  -2  -4  -1    3.37    0.10
  -2  -4  -1    3.54    0.13
  -2  -4  -1    3.43    0.11
   2  -4   1    3.53    0.11
   2  -4   1    3.71    0.13
  -2   4  -1    3.48    0.11
   2   4   1    3.49    0.12
  -2   4  -1    3.44    0.11
   2   4   1    3.33    0.11
   2   4   1    3.56    0.10
   2   4   1    3.39    0.10
  -3  -4  -1    8.91    0.24
   3  -4   1    8.87    0.25
  -3  -4  -1    8.54    0.23
   3  -4   1    8.67    0.24
  -3  -4  -1    8.66    0.23
   3  -4   1    8.92    0.25
  -3   4  -1    8.48    0.24
  -3   4  -1    8.59    0.24
   3   4   1    8.73    0.24
   3   4   1    8.79    0.23
  -4  -4  -1    0.84    0.08
  -4  -4  -1    0.68    0.08
   4  -4   1    0.75    0.09
   4  -4   1    0.71    0.08
  -4  -4  -1    0.72    0.06
  -4   4  -1    0.68    0.08
   4   4   1    0.72    0.08
  -4   4  -1    0.71    0.08
   4   4   1    0.68    0.07
  -5  -4  -1    1.29    0.10
   5  -4   1    1.35    0.12
  -5  -4  -1    1.37    0.11
   5   4   1    1.22    0.11
  -5   4  -1    1.26    0.11
   5   4   1    1.17    0.10
  -5   4  -1    1.34    0.11
  -6  -4  -1    4.66    0.19
   6  -4   1    4.46    0.20
   6  -4   1    4.76    0.22
  -6  -4  -1    4.44    0.19
   6   4   1    4.21    0.18
  -6   4  -1    4.68    0.20
   6   4   1    4.30    0.19
  -6   4  -1    4.37    0.19
   7  -4   1    1.34    0.17
   7  -4   1    1.33    0.17
  -7  -4  -1    1.60    0.15
  -7  -4  -1    1.35    0.15
   7   4   1    1.28    0.14
  -7   4  -1    1.24    0.14
   7   4   1    1.42    0.14
  -7   4  -1    1.16    0.14
   8  -4   1    2.90    0.22
   8  -4   1    2.42    0.20
  -8  -4  -1    3.09    0.21
  -8  -4  -1    2.95    0.21
  -8   4  -1    2.89    0.21
   8   4   1    2.71    0.22
  -8   4  -1    2.60    0.24
   8   4   1    3.03    0.26
  -9  -4  -1    0.08    0.14
   9  -4   1    0.09    0.21
   9  -4   1   -0.03    0.15
  -9  -4  -1    0.04    0.12
   9   4   1   -0.22    0.15
   9   4   1   -0.12    0.15
  -9   4  -1    0.20    0.17
  -9   4  -1   -0.14    0.13
  10  -4   1    0.12    0.21
 -10  -4  -1    0.25    0.20
 -10   4  -1    0.35    0.19
 -10   4  -1   -0.20    0.19
  10   4   1    0.19    0.18
  10   4   1    0.02    0.18
 -11  -4  -1    0.25    0.20
  11  -4   1    0.06    0.27
  11   4   1    0.32    0.24
  11   4   1   -0.20    0.20
 -11   4  -1    0.15    0.20
  12  -4   1    0.19    0.33
 -12  -4  -1    0.34    0.30
  12   4   1   -0.11    0.12
 -12  -5   1   -0.35    0.28
 -12  -5   1   -0.01    0.21
  12  -5  -1    0.47    0.37
  12   5  -1    0.06    0.55
  11  -5  -1    0.27    0.28
 -11  -5   1   -0.25    0.16
 -11  -5   1    0.08    0.23
 -11   5   1    0.10    0.26
  11   5  -1    0.29    0.22
  11   5  -1   -0.31    0.24
 -11   5   1    0.35    0.20
  10  -5  -1    0.56    0.36
 -10  -5   1    0.29    0.15
 -10  -5   1    0.25    0.18
 -10   5   1    0.52    0.21
  10   5  -1    0.17    0.18
 -10   5   1    0.41    0.22
  10   5  -1    0.53    0.21
  -9  -5   1    0.95    0.16
   9  -5  -1    0.48    0.18
  -9  -5   1    0.88    0.15
  -9  -5   1    0.76    0.16
   9  -5  -1    1.16    0.20
  -9   5   1    1.00    0.19
   9   5  -1    0.81    0.17
  -9   5   1    0.81    0.17
   9   5  -1    1.03    0.17
   8  -5  -1    0.12    0.13
   8  -5  -1    0.22    0.15
  -8  -5   1    0.20    0.13
  -8  -5   1    0.30    0.10
  -8  -5   1    0.27    0.13
   8   5  -1    0.31    0.14
  -8   5   1    0.35    0.14
  -8   5   1    0.42    0.13
   8   5  -1    0.27    0.15
  -7  -5   1    1.34    0.13
  -7  -5   1    1.29    0.16
   7  -5  -1    1.43    0.16
  -7  -5   1    1.29    0.16
   7  -5  -1    1.32    0.15
   7   5  -1    1.32    0.14
  -7   5   1    1.35    0.17
  -7   5   1    1.41    0.15
   7   5  -1    1.33    0.17
  -6  -5   1   -0.06    0.07
  -6  -5   1    0.06    0.07
   6  -5  -1    0.06    0.09
   6  -5  -1    0.07    0.07
  -6  -5   1   -0.06    0.06
   6   5  -1   -0.04    0.07
   6   5  -1    0.07    0.08
  -6   5   1    0.05    0.08
  -6   5   1   -0.05    0.07
  -5  -5   1    0.09    0.06
   5  -5  -1    0.04    0.06
   5  -5  -1    0.11    0.08
  -5  -5   1    0.14    0.06
  -5   5   1    0.02    0.06
   5   5  -1    0.13    0.06
  -5   5   1    0.04    0.06
   5   5  -1    0.12    0.06
  -4  -5   1    0.40    0.06
  -4  -5   1    0.57    0.07
   4  -5  -1    0.35    0.07
   4  -5  -1    0.41    0.07
  -4  -5   1    0.44    0.07
  -4  -5   1    0.38    0.06
  -4   5   1    0.45    0.07
  -4   5   1    0.39    0.06
   4   5  -1    0.34    0.06
   4   5  -1    0.43    0.06
  -3  -5   1    4.40    0.15
  -3  -5   1    4.45    0.14
   3  -5  -1    4.32    0.15
   3  -5  -1    4.45    0.16
   3  -5  -1    4.45    0.16
  -3  -5   1    4.41    0.16
  -3  -5   1    4.56    0.14
  -3   5   1    4.54    0.15
   3   5  -1    4.46    0.14
  -3   5   1    4.44    0.15
   3   5  -1    4.45    0.14
   2  -5  -1   -0.06    0.03
  -2  -5   1   -0.02    0.04
   2  -5  -1    0.13    0.04
   2  -5  -1    0.03    0.04
  -2  -5   1   -0.02    0.04
  -2  -5   1   -0.03    0.02
   2  -5  -1   -0.02    0.05
  -2   5   1   -0.06    0.03
   2   5  -1   -0.04    0.02
   2   5  -1    0.07    0.04
   2   5  -1   -0.04    0.02
   2   5  -1    0.01    0.03
   2   5  -1    0.00    0.04
  -2   5   1   -0.03    0.03
   1  -5  -1    2.52    0.11
  -1  -5   1    2.34    0.06
  -1  -5   1    2.36    0.06
  -1  -5   1    2.32    0.10
   1  -5  -1    2.26    0.07
   1  -5  -1    2.31    0.11
  -1  -5   1    2.33    0.11
  -1   5   1    2.39    0.07
   1   5  -1    2.14    0.06
  -1   5   1    2.35    0.10
   1   5  -1    2.30    0.09
   1   5  -1    2.31    0.11
   1   5  -1    2.45    0.06
   1   5  -1    2.34    0.10
  -1   5   1    2.26    0.07
  -1   5   1    2.41    0.11
   1   5  -1    2.41    0.11
   0  -5   1   16.47    0.41
   0  -5  -1   16.69    0.43
   0  -5  -1   16.37    0.37
   0  -5   1   16.37    0.43
   0  -5  -1   16.86    0.37
   0  -5  -1   17.01    0.42
   0   5  -1   17.18    0.42
   0   5  -1   17.07    0.41
   0   5  -1   16.93    0.43
   0   5   1   16.62    0.41
   0   5  -1   16.82    0.42
   0   5   1   16.04    0.42
   0   5   1   16.66    0.43
  -1  -5  -1    5.96    0.19
  -1  -5  -1    5.73    0.17
   1  -5   1    6.13    0.15
   1  -5   1    5.71    0.18
   1  -5   1    5.55    0.19
  -1  -5  -1    6.06    0.14
   1   5   1    5.65    0.18
   1   5   1    5.97    0.14
   1   5   1    5.95    0.19
  -1   5  -1    5.99    0.15
  -1   5  -1    6.05    0.19
  -1   5  -1    6.10    0.15
   1   5   1    5.96    0.14
   1   5   1    5.98    0.17
   1   5   1    6.12    0.18
  -1   5  -1    5.74    0.18
  -2  -5  -1   16.81    0.41
   2  -5   1   16.96    0.40
   2  -5   1   17.03    0.41
   2  -5   1   16.94    0.44
  -2  -5  -1   16.57    0.42
  -2  -5  -1   16.33    0.39
   2  -5   1   16.78    0.43
  -2   5  -1   16.94    0.40
   2   5   1   17.09    0.42
  -2   5  -1   16.58    0.40
   2   5   1   16.34    0.40
  -2   5  -1   17.22    0.42
   2   5   1   16.61    0.39
   2   5   1   16.68    0.40
  -3  -5  -1    0.48    0.06
   3  -5   1    0.46    0.07
  -3  -5  -1    0.49    0.05
  -3  -5  -1    0.40    0.06
   3  -5   1    0.43    0.05
   3  -5   1    0.57    0.07
  -3  -5  -1    0.43    0.05
   3   5   1    0.43    0.05
   3   5   1    0.42    0.05
   3   5   1    0.56    0.06
  -3   5  -1    0.37    0.05
  -3   5  -1    0.43    0.05
   4  -5   1   10.64    0.30
  -4  -5  -1   10.43    0.28
   4  -5   1   10.50    0.30
   4  -5   1   10.53    0.30
  -4  -5  -1   10.37    0.29
  -4  -5  -1   10.80    0.29
   4   5   1   10.55    0.29
  -4   5  -1   10.36    0.29
  -4   5  -1   10.24    0.30
   4   5   1   10.61    0.29
   5  -5   1    0.99    0.11
   5  -5   1    1.02    0.11
  -5  -5  -1    1.04    0.13
  -5  -5  -1    0.92    0.10
  -5  -5  -1    1.00    0.09
   5  -5   1    0.94    0.10
   5   5   1    0.82    0.10
  -5   5  -1    0.99    0.10
  -5   5  -1    0.98    0.10
   5   5   1    1.03    0.11
  -6  -5  -1    1.16    0.10
   6  -5   1    1.22    0.15
   6  -5   1    1.40    0.14
  -6  -5  -1    1.08    0.13
  -6  -5  -1    1.31    0.13
   6   5   1    1.11    0.13
  -6   5  -1    1.31    0.15
   6   5   1    1.06    0.12
  -6   5  -1    1.19    0.12
  -7  -5  -1    0.50    0.09
  -7  -5  -1    0.35    0.10
   7  -5   1    0.44    0.10
   7  -5   1    0.38    0.12
  -7  -5  -1    0.34    0.10
   7   5   1    0.30    0.09
   7   5   1    0.21    0.11
  -7   5  -1    0.28    0.10
   8  -5   1    0.24    0.15
  -8  -5  -1    0.56    0.14
   8  -5   1    0.35    0.13
  -8  -5  -1    0.56    0.10
  -8  -5  -1    0.46    0.13
  -8   5  -1    0.42    0.15
   8   5   1    0.50    0.16
  -8   5  -1    0.65    0.13
   9  -5   1    1.17    0.20
  -9  -5  -1    1.03    0.17
  -9  -5  -1    1.01    0.16
   9  -5   1    0.88    0.19
   9   5   1    1.18    0.17
  -9   5  -1    0.93    0.18
  -9   5  -1    0.95    0.18
   9   5   1    0.93    0.17
 -10  -5  -1    0.24    0.20
 -10  -5  -1    0.08    0.15
  10  -5   1    0.18    0.21
  10   5   1   -0.37    0.17
 -10   5  -1    0.10    0.19
  10   5   1   -0.14    0.23
 -10   5  -1    0.10    0.21
 -11  -5  -1    0.19    0.25
 -11  -5  -1    0.02    0.17
  11  -5   1    0.14    0.30
 -11   5  -1    0.27    0.19
 -11   5  -1   -0.42    0.32
  11   5   1   -0.05    0.26
  11   5   1    0.44    0.20
  12  -5   1    0.12    0.31
  12  -5   1    0.43    0.23
 -12  -5  -1   -0.03    0.19
 -12  -5  -1   -0.34    0.28
  12  -6  -1    1.11    0.26
 -12  -6   1    0.73    0.24
  12  -6  -1    1.51    0.38
 -12  -6   1    0.36    0.31
  12   6  -1    0.53    0.29
 -12   6   1    0.62    0.27
  11  -6  -1    0.18    0.28
 -11  -6   1   -0.31    0.38
 -11  -6   1   -0.13    0.20
  11   6  -1   -0.06    0.25
 -11   6   1   -0.14    0.20
  11   6  -1    0.21    0.24
 -11   6   1    0.69    0.42
 -10  -6   1    0.06    0.15
 -10  -6   1   -0.24    0.17
 -10   6   1   -0.05    0.18
 -10   6   1    0.12    0.22
  10   6  -1   -0.01    0.19
  10   6  -1   -0.33    0.19
   9  -6  -1    1.38    0.23
   9  -6  -1    1.08    0.23
  -9  -6   1    1.21    0.17
  -9  -6   1    1.32    0.18
  -9   6   1    1.03    0.17
  -9   6   1    0.98    0.19
   9   6  -1    1.26    0.19
   9   6  -1    1.17    0.18
   8  -6  -1    0.74    0.16
   8  -6  -1    0.64    0.15
  -8  -6   1    0.54    0.13
  -8  -6   1    0.47    0.14
  -8  -6   1    0.63    0.13
  -8   6   1    0.58    0.14
  -8   6   1    0.47    0.14
   8   6  -1    0.70    0.14
   8   6  -1    0.53    0.17
  -7  -6   1    0.06    0.08
  -7  -6   1    0.07    0.09
   7  -6  -1   -0.10    0.10
   7  -6  -1   -0.05    0.11
  -7  -6   1   -0.11    0.09
   7   6  -1    0.04    0.10
   7   6  -1   -0.11    0.09
  -7   6   1    0.14    0.11
  -7   6   1    0.14    0.11
  -6  -6   1    1.11    0.12
   6  -6  -1    1.12    0.13
  -6  -6   1    1.02    0.11
   6  -6  -1    1.15    0.13
  -6  -6   1    0.93    0.11
   6   6  -1    1.08    0.13
   6   6  -1    1.05    0.11
  -6   6   1    1.06    0.12
  -6   6   1    1.23    0.14
  -5  -6   1    2.66    0.14
   5  -6  -1    2.81    0.16
   5  -6  -1    2.77    0.16
   5  -6  -1    2.38    0.14
  -5  -6   1    2.79    0.14
  -5  -6   1    2.69    0.14
   5   6  -1    2.63    0.14
  -5   6   1    2.75    0.15
  -5   6   1    2.75    0.15
   5   6  -1    2.57    0.13
   4  -6  -1    6.13    0.22
  -4  -6   1    5.39    0.21
  -4  -6   1    6.23    0.20
  -4  -6   1    6.01    0.19
  -4  -6   1    5.99    0.21
   4  -6  -1    6.14    0.21
   4  -6  -1    6.04    0.20
  -4   6   1    5.89    0.20
   4   6  -1    5.99    0.19
  -4   6   1    6.02    0.20
   4   6  -1    6.21    0.19
  -3  -6   1   12.61    0.32
  -3  -6   1   12.50    0.33
   3  -6  -1   12.34    0.35
   3  -6  -1   11.95    0.33
   3  -6  -1   12.47    0.36
  -3  -6   1   12.27    0.31
   3  -6  -1   13.02    0.33
  -3  -6   1   12.17    0.34
  -3   6   1   12.42    0.33
   3   6  -1   12.38    0.32
   3   6  -1   12.91    0.37
   3   6  -1   12.54    0.31
   3   6  -1   12.81    0.32
   3   6  -1   13.09    0.34
  -3   6   1   12.68    0.33
  -2  -6   1    2.41    0.13
  -2  -6   1    2.19    0.08
   2  -6  -1    2.37    0.12
   2  -6  -1    2.36    0.12
   2  -6  -1    2.33    0.09
  -2  -6   1    2.31    0.08
  -2  -6   1    2.33    0.11
   2  -6  -1    2.31    0.09
   2   6  -1    2.47    0.11
   2   6  -1    2.42    0.13
   2   6  -1    2.32    0.08
   2   6  -1    2.46    0.10
   2   6  -1    2.28    0.08
  -2   6   1    2.39    0.09
   2   6  -1    2.50    0.11
  -2   6   1    2.34    0.09
   1  -6  -1    0.06    0.04
  -1  -6   1   -0.02    0.04
   1  -6  -1   -0.03    0.02
   1  -6  -1    0.00    0.02
   1  -6  -1    0.01    0.03
   1  -6  -1    0.01    0.05
   1   6  -1    0.07    0.04
  -1   6   1    0.00    0.02
  -1   6   1   -0.01    0.04
   1   6  -1    0.06    0.04
  -1   6   1    0.00    0.02
  -1   6   1    0.03    0.04
   1   6  -1   -0.03    0.05
   1   6  -1   -0.02    0.05
   0  -6   1    5.11    0.17
   0  -6   1    5.45    0.19
   0  -6  -1    5.16    0.17
   0  -6  -1    5.22    0.19
   0   6  -1    5.03    0.17
   0   6  -1    5.17    0.18
   0   6  -1    5.03    0.18
   0   6   1    4.92    0.18
   0   6   1    5.35    0.19
   0   6   1    5.22    0.18
   0   6  -1    5.59    0.19
  -1  -6  -1    1.43    0.05
   1  -6   1    1.39    0.05
   1  -6   1    1.37    0.10
  -1  -6  -1    1.35    0.04
   1  -6   1    1.34    0.09
  -1  -6  -1    1.30    0.08
   1  -6   1    1.42    0.08
   1  -6   1    1.49    0.06
  -1  -6  -1    1.32    0.10
  -1   6  -1    1.39    0.10
   1   6   1    1.46    0.09
  -1   6  -1    1.54    0.10
   1   6   1    1.50    0.04
   1   6   1    1.38    0.04
   1   6   1    1.61    0.10
   1   6   1    1.38    0.08
  -1   6  -1    1.51    0.05
  -1   6  -1    1.42    0.05
   1   6   1    1.41    0.09
   2  -6   1   16.61    0.43
   2  -6   1   16.50    0.45
   2  -6   1   16.68    0.40
   2  -6   1   16.79    0.41
  -2  -6  -1   16.61    0.42
  -2  -6  -1   16.36    0.44
  -2  -6  -1   16.40    0.39
   2   6   1   17.43    0.43
  -2   6  -1   16.51    0.40
   2   6   1   17.02    0.46
   2   6   1   16.40    0.41
   2   6   1   16.51    0.39
  -2   6  -1   16.89    0.40
   2   6   1   16.48    0.39
  -2   6  -1   17.10    0.43
  -3  -6  -1   17.05    0.44
   3  -6   1   14.24    0.44
   3  -6   1   16.92    0.46
  -3  -6  -1   17.06    0.41
  -3  -6  -1   17.17    0.42
   3  -6   1   17.06    0.42
   3  -6   1   16.62    0.44
  -3  -6  -1   16.79    0.41
  -3   6  -1   16.87    0.42
   3   6   1   16.74    0.43
   3   6   1   16.89    0.41
   3   6   1   16.46    0.41
   3   6   1   17.01    0.42
  -3   6  -1   16.78    0.42
   4  -6   1    1.64    0.12
  -4  -6  -1    1.43    0.12
  -4  -6  -1    1.50    0.10
   4  -6   1    1.51    0.12
  -4  -6  -1    1.43    0.10
   4  -6   1    1.52    0.11
   4   6   1    1.60    0.10
  -4   6  -1    1.58    0.10
   4   6   1    1.46    0.10
   4   6   1    1.70    0.11
  -4   6  -1    1.67    0.11
  -5  -6  -1    1.85    0.12
  -5  -6  -1    1.86    0.12
   5  -6   1    1.84    0.13
   5  -6   1    1.69    0.14
   5  -6   1    1.49    0.14
  -5  -6  -1    1.96    0.12
   5   6   1    1.84    0.12
  -5   6  -1    1.75    0.13
  -5   6  -1    1.85    0.13
   5   6   1    1.65    0.13
  -6  -6  -1    0.49    0.09
   6  -6   1    0.29    0.10
   6  -6   1    0.48    0.10
  -6  -6  -1    0.44    0.08
   6  -6   1    0.43    0.10
  -6  -6  -1    0.43    0.09
  -6   6  -1    0.38    0.09
  -6   6  -1    0.29    0.10
   6   6   1    0.53    0.10
   6   6   1    0.46    0.09
  -7  -6  -1    0.45    0.12
  -7  -6  -1    0.29    0.10
  -7  -6  -1    0.44    0.11
   7  -6   1    0.32    0.11
   7  -6   1    0.38    0.12
   7  -6   1    0.36    0.12
   7   6   1    0.26    0.10
   7   6   1    0.36    0.12
  -7   6  -1    0.43    0.12
  -7   6  -1    0.33    0.14
   8  -6   1    0.64    0.14
  -8  -6  -1    1.00    0.12
   8  -6   1    0.77    0.16
  -8  -6  -1    0.87    0.14
   8  -6   1    0.77    0.17
  -8  -6  -1    0.98    0.15
  -8   6  -1    0.85    0.15
   8   6   1    1.01    0.16
  -8   6  -1    0.85    0.17
   9  -6   1    0.91    0.20
   9  -6   1    0.70    0.21
  -9  -6  -1    0.32    0.20
   9  -6   1    0.70    0.15
  -9  -6  -1    0.60    0.18
  -9  -6  -1    0.56    0.16
  -9   6  -1    0.74    0.17
  -9   6  -1    0.55    0.19
   9   6   1    0.61    0.17
   9   6   1    0.60    0.17
  10  -6   1    0.42    0.18
 -10  -6  -1    0.51    0.21
 -10  -6  -1    0.09    0.16
  10   6   1    0.05    0.20
 -10   6  -1    0.57    0.23
  10   6   1    0.29    0.21
 -10   6  -1    0.50    0.19
  11  -6   1   -0.17    0.26
 -11  -6  -1    0.31    0.18
  11  -6   1    0.09    0.20
 -11   6  -1    0.33    0.29
  11   6   1    0.70    0.23
 -11   6  -1    0.09    0.20
  11   6   1    0.32    0.26
 -12  -6  -1    0.19    0.24
 -12  -6  -1    0.35    0.30
  12  -6   1    0.23    0.23
  12  -6   1    0.02    0.34
 -12   6  -1   -0.30    0.29
  12   6   1    0.27    0.32
 -12  -7   1    0.37    0.30
  12  -7  -1    0.52    0.33
  12  -7  -1    0.12    0.26
 -12  -7   1    0.46    0.26
  12   7  -1    0.11    0.47
  11  -7  -1    0.15    0.22
 -11  -7   1    0.10    0.28
  11  -7  -1    0.55    0.32
 -11  -7   1   -0.17    0.20
 -11   7   1   -0.64    0.51
  11   7  -1   -0.14    0.26
  11   7  -1   -0.17    0.15
 -11   7   1   -0.08    0.14
 -10  -7   1    0.04    0.16
  10  -7  -1    0.03    0.17
 -10  -7   1    0.04    0.18
  10  -7  -1    0.39    0.28
 -10   7   1   -0.09    0.16
  10   7  -1    0.10    0.18
  10   7  -1   -0.22    0.19
 -10   7   1   -0.08    0.23
  -9  -7   1    1.52    0.24
   9  -7  -1    1.36    0.23
  -9  -7   1    1.44    0.26
  -9  -7   1    1.54    0.19
   9  -7  -1    1.67    0.20
  -9   7   1    2.59    0.30
  -9   7   1    1.36    0.20
   9   7  -1    1.69    0.21
   9   7  -1    1.33    0.19
  -8  -7   1    0.06    0.14
   8  -7  -1    0.06    0.14
  -8  -7   1    0.18    0.13
   8  -7  -1    0.16    0.13
  -8  -7   1    0.09    0.11
   8  -7  -1    0.02    0.15
   8   7  -1   -0.01    0.13
  -8   7   1    0.02    0.13
  -8   7   1    0.23    0.14
   8   7  -1    0.14    0.12
  -7  -7   1    5.47    0.23
   7  -7  -1    5.41    0.28
  -7  -7   1    5.49    0.23
  -7  -7   1    4.81    0.24
  -7  -7   1    5.17    0.25
   7  -7  -1    5.08    0.25
   7  -7  -1    4.99    0.26
  -7   7   1    5.17    0.26
   7   7  -1    4.92    0.27
   7   7  -1    5.04    0.24
  -7   7   1    5.34    0.27
   6  -7  -1    0.09    0.09
   6  -7  -1    0.09    0.10
  -6  -7   1   -0.05    0.08
   6  -7  -1    0.23    0.09
  -6  -7   1    0.05    0.09
  -6  -7   1    0.09    0.08
  -6  -7   1   -0.04    0.09
  -6   7   1    0.03    0.09
   6   7  -1    0.04    0.08
   6   7  -1    0.09    0.08
  -6   7   1    0.05    0.08
  -5  -7   1    0.89    0.12
  -5  -7   1    0.98    0.11
   5  -7  -1    1.07    0.13
  -5  -7   1    1.08    0.12
   5  -7  -1    0.94    0.12
  -5  -7   1    0.93    0.12
   5  -7  -1    1.09    0.12
   5  -7  -1    0.86    0.10
  -5   7   1    1.02    0.11
   5   7  -1    0.96    0.11
   5   7  -1    0.97    0.10
  -5   7   1    0.93    0.10
   4  -7  -1    0.29    0.07
   4  -7  -1    0.26    0.07
  -4  -7   1    0.25    0.06
  -4  -7   1    0.35    0.08
   4  -7  -1    0.26    0.08
  -4  -7   1    0.28    0.06
   4   7  -1    0.35    0.06
   4   7  -1    0.28    0.09
  -4   7   1    0.26    0.06
  -4   7   1    0.31    0.07
   4   7  -1    0.29    0.06
   3  -7  -1    0.41    0.06
  -3  -7   1    0.56    0.06
   3  -7  -1    0.32    0.06
  -3  -7   1    0.39    0.08
  -3  -7   1    0.56    0.08
   3  -7  -1    0.38    0.06
   3  -7  -1    0.33    0.08
   3   7  -1    0.44    0.05
   3   7  -1    0.31    0.06
   3   7  -1    0.51    0.09
  -3   7   1    0.42    0.06
  -3   7   1    0.44    0.06
   3   7  -1    0.37    0.04
   3   7  -1    0.48    0.09
  -2  -7   1    0.09    0.06
   2  -7  -1    0.15    0.05
   2  -7  -1    0.18    0.04
  -2  -7   1    0.11    0.07
  -2  -7   1    0.12    0.03
   2  -7  -1    0.16    0.06
  -2  -7   1    0.14    0.03
  -2   7   1    0.20    0.04
   2   7  -1    0.13    0.08
   2   7  -1    0.15    0.03
  -2   7   1    0.15    0.04
   2   7  -1    0.10    0.06
   2   7  -1    0.07    0.05
   2   7  -1    0.16    0.06
   2   7  -1    0.17    0.02
   1  -7  -1   17.24    0.48
   1  -7  -1   17.22    0.46
   1  -7  -1   18.22    0.41
   1  -7  -1   17.89    0.41
  -1   7   1   17.60    0.47
  -1   7   1   17.57    0.41
   1   7  -1   17.95    0.45
   1   7  -1   17.78    0.45
  -1   7   1   18.14    0.41
  -1   7   1   17.83    0.47
   1   7  -1   17.53    0.46
   1   7  -1   18.30    0.47
   1   7  -1   18.16    0.49
  -1   7   1   17.86    0.48
   0  -7  -1   14.19    0.38
   0  -7   1   14.43    0.41
   0  -7   1   14.53    0.38
   0  -7  -1   14.61    0.41
   0   7   1   14.50    0.39
   0   7   1   14.35    0.38
   0   7  -1   13.96    0.38
   0   7   1   13.79    0.39
   0   7   1   14.53    0.40
   0   7  -1   14.40    0.40
   0   7  -1   13.86    0.39
   0   7  -1   14.49    0.39
   1  -7   1    5.50    0.18
   1  -7   1    5.22    0.14
  -1  -7  -1    5.71    0.20
   1  -7   1    5.13    0.20
   1  -7   1    5.14    0.19
  -1  -7  -1    5.18    0.18
   1  -7   1    5.49    0.14
   1   7   1    5.44    0.21
  -1   7  -1    5.44    0.14
  -1   7  -1    5.57    0.21
  -1   7  -1    5.28    0.20
   1   7   1    5.59    0.18
   1   7   1    5.51    0.20
  -1   7  -1    5.22    0.14
   1   7   1    5.68    0.19
  -2  -7  -1    7.91    0.27
  -2  -7  -1    8.16    0.21
   2  -7   1    8.01    0.21
   2  -7   1    7.95    0.26
   2  -7   1    8.24    0.27
  -2  -7  -1    7.94    0.20
   2   7   1    7.78    0.25
   2   7   1    8.08    0.20
  -2   7  -1    8.16    0.21
   2   7   1    8.08    0.23
   2   7   1    8.58    0.28
  -2   7  -1    8.41    0.27
   2   7   1    8.21    0.20
  -2   7  -1    8.20    0.21
   3  -7   1    0.38    0.06
   3  -7   1    0.31    0.06
  -3  -7  -1    0.52    0.08
   3  -7   1    0.40    0.08
  -3  -7  -1    0.41    0.10
   3  -7   1    0.40    0.08
  -3  -7  -1    0.19    0.05
  -3  -7  -1    0.32    0.05
  -3   7  -1    0.34    0.05
   3   7   1    0.33    0.04
   3   7   1    0.33    0.06
  -3   7  -1    0.34    0.06
   3   7   1    0.32    0.09
   3   7   1    0.32    0.05
   3   7   1    0.51    0.10
  -4  -7  -1    0.29    0.06
  -4  -7  -1    0.26    0.08
  -4  -7  -1    0.29    0.06
  -4  -7  -1    0.37    0.08
   4  -7   1    0.25    0.07
   4  -7   1    0.29    0.07
   4  -7   1    0.17    0.08
   4   7   1    0.37    0.09
   4   7   1    0.36    0.06
  -4   7  -1    0.27    0.07
   4   7   1    0.32    0.06
  -4   7  -1    0.35    0.07
   5  -7   1    0.88    0.11
  -5  -7  -1    1.01    0.10
  -5  -7  -1    0.92    0.09
   5  -7   1    1.13    0.12
  -5  -7  -1    0.94    0.11
   5  -7   1    0.76    0.09
  -5  -7  -1    1.11    0.13
   5   7   1    0.92    0.10
   5   7   1    0.98    0.12
   5   7   1    1.02    0.12
  -5   7  -1    0.99    0.11
  -5   7  -1    0.74    0.10
  -6  -7  -1    0.56    0.10
   6  -7   1    0.47    0.12
   6  -7   1    0.65    0.11
  -6  -7  -1    0.41    0.09
   6  -7   1    0.64    0.11
  -6  -7  -1    0.49    0.10
  -6  -7  -1    0.44    0.11
   6   7   1    0.44    0.10
   6   7   1    0.53    0.10
  -6   7  -1    0.48    0.10
  -6   7  -1    0.48    0.11
   7  -7   1    0.05    0.11
  -7  -7  -1   -0.09    0.10
   7  -7   1   -0.19    0.12
  -7  -7  -1    0.09    0.10
   7  -7   1   -0.16    0.10
  -7  -7  -1   -0.05    0.09
   7   7   1   -0.06    0.10
   7   7   1   -0.03    0.15
  -7   7  -1    0.07    0.12
  -7   7  -1   -0.13    0.11
   8  -7   1    1.52    0.18
   8  -7   1    1.63    0.20
  -8  -7  -1    1.64    0.17
  -8  -7  -1    1.52    0.17
   8  -7   1    1.79    0.20
  -8  -7  -1    1.83    0.18
   8   7   1    1.64    0.19
  -8   7  -1    1.89    0.23
   8   7   1    1.99    0.21
  -8   7  -1    1.53    0.19
  -9  -7  -1   -0.02    0.17
  -9  -7  -1    0.01    0.14
   9  -7   1   -0.04    0.18
   9  -7   1   -0.06    0.15
   9   7   1   -0.02    0.17
  -9   7  -1    0.12    0.14
   9   7   1    0.09    0.16
  -9   7  -1    0.19    0.18
  10  -7   1    0.06    0.17
 -10  -7  -1   -0.11    0.17
 -10  -7  -1   -0.14    0.19
  10  -7   1   -0.11    0.30
  10   7   1    0.34    0.20
 -10   7  -1   -0.25    0.23
  10   7   1   -0.12    0.19
 -10   7  -1    0.00    0.17
 -11  -7  -1    0.10    0.29
  11  -7   1    0.00    0.31
  11  -7   1    0.22    0.22
 -11  -7  -1    0.05    0.19
 -11   7  -1   -0.32    0.14
  11   7   1   -0.32    0.13
  11   7   1   -0.23    0.26
  11  -8  -1    0.13    0.25
 -11  -8   1    1.04    0.32
  11  -8  -1    0.43    0.34
 -11  -8   1    0.31    0.23
 -11   8   1    0.25    0.36
  11   8  -1    0.17    0.17
  10  -8  -1    0.07    0.20
  10  -8  -1    0.28    0.31
 -10  -8   1    0.05    0.20
 -10  -8   1    0.09    0.19
  10   8  -1    0.10    0.21
 -10   8   1    0.43    0.25
  10   8  -1    0.04    0.21
 -10   8   1   -0.05    0.17
  -9  -8   1    1.67    0.22
  -9  -8   1    1.29    0.19
   9  -8  -1    1.13    0.20
  -9  -8   1    1.30    0.20
   9  -8  -1    1.10    0.22
   9   8  -1    1.13    0.19
  -9   8   1    1.35    0.20
  -9   8   1    1.28    0.21
   8  -8  -1    1.07    0.17
  -8  -8   1    1.18    0.16
  -8  -8   1    1.55    0.22
   8  -8  -1    0.96    0.18
  -8  -8   1    0.95    0.15
   8  -8  -1    1.32    0.19
  -8  -8   1    1.20    0.18
  -8   8   1    0.88    0.16
  -8   8   1    1.46    0.19
   8   8  -1    0.84    0.18
   8   8  -1    0.96    0.15
  -7  -8   1    1.62    0.18
   7  -8  -1    1.80    0.22
  -7  -8   1    1.71    0.17
   7  -8  -1    1.56    0.17
  -7  -8   1    1.92    0.21
   7  -8  -1    1.85    0.21
  -7  -8   1    1.56    0.16
   7   8  -1    1.72    0.17
   7   8  -1    1.67    0.19
  -7   8   1    1.61    0.19
  -7   8   1    1.65    0.20
  -6  -8   1    0.69    0.11
  -6  -8   1    0.79    0.14
   6  -8  -1    0.99    0.14
  -6  -8   1    0.89    0.12
   6  -8  -1    0.69    0.13
   6  -8  -1    1.04    0.14
  -6  -8   1    0.75    0.10
   6  -8  -1    0.67    0.11
  -6   8   1    0.93    0.12
  -6   8   1    0.55    0.11
   6   8  -1    0.59    0.10
   6   8  -1    0.80    0.11
  -5  -8   1    0.12    0.10
   5  -8  -1    0.10    0.09
  -5  -8   1   -0.06    0.09
  -5  -8   1   -0.01    0.07
   5  -8  -1    0.07    0.08
   5  -8  -1    0.02    0.08
   5  -8  -1    0.10    0.08
  -5   8   1    0.10    0.08
   5   8  -1    0.02    0.06
  -5   8   1    0.02    0.07
   5   8  -1    0.02    0.07
   5   8  -1    0.04    0.07
   5   8  -1   -0.10    0.09
   4  -8  -1    2.13    0.14
  -4  -8   1    1.98    0.11
  -4  -8   1    2.07    0.17
   4  -8  -1    2.01    0.14
  -4  -8   1    2.07    0.11
   4  -8  -1    2.20    0.16
  -4  -8   1    1.96    0.14
   4  -8  -1    2.20    0.13
  -4   8   1    2.06    0.11
  -4   8   1    1.99    0.12
   4   8  -1    2.14    0.10
   4   8  -1    2.09    0.17
   4   8  -1    2.29    0.16
   4   8  -1    2.19    0.11
  -3  -8   1    4.29    0.13
   3  -8  -1    4.01    0.19
   3  -8  -1    4.13    0.19
   3  -8  -1    4.34    0.16
  -3  -8   1    3.91    0.13
  -3  -8   1    4.03    0.19
   3  -8  -1    4.09    0.15
  -3  -8   1    4.25    0.18
   3   8  -1    4.07    0.13
   3   8  -1    3.89    0.18
   3   8  -1    4.29    0.16
  -3   8   1    3.98    0.15
  -3   8   1    4.09    0.15
   3   8  -1    4.31    0.20
   3   8  -1    3.95    0.13
   2  -8  -1    5.66    0.16
   2  -8  -1    5.42    0.18
   2  -8  -1    5.56    0.22
  -2  -8   1    5.25    0.13
  -2  -8   1    5.56    0.14
   2  -8  -1    5.47    0.21
  -2   8   1    5.74    0.16
   2   8  -1    5.38    0.19
   2   8  -1    5.14    0.24
   2   8  -1    4.98    0.23
  -2   8   1    5.48    0.16
   2   8  -1    5.36    0.20
   1  -8  -1    6.12    0.22
   1  -8  -1    5.92    0.15
   1  -8  -1    6.30    0.15
   1  -8  -1    5.99    0.23
   1   8  -1    5.88    0.23
   1   8  -1    5.96    0.20
   1   8  -1    6.19    0.20
  -1   8   1    5.85    0.14
  -1   8   1    5.70    0.21
  -1   8   1    6.12    0.23
   1   8  -1    6.02    0.23
  -1   8   1    6.09    0.23
   1   8  -1    6.04    0.22
   0  -8  -1    0.30    0.07
   0  -8  -1    0.25    0.06
   0  -8   1    0.23    0.06
   0  -8   1    0.22    0.07
   0   8   1    0.27    0.07
   0   8   1    0.16    0.06
   0   8  -1    0.34    0.07
   0   8   1    0.27    0.09
   0   8  -1    0.27    0.09
   0   8  -1    0.21    0.08
   0   8  -1    0.31    0.07
   0   8   1    0.34    0.08
   1  -8   1    1.63    0.06
  -1  -8  -1    1.84    0.12
   1  -8   1    1.66    0.13
   1  -8   1    1.66    0.13
   1  -8   1    1.71    0.06
   1   8   1    1.62    0.13
   1   8   1    1.51    0.11
   1   8   1    1.50    0.12
   1   8   1    1.61    0.12
  -1   8  -1    1.51    0.14
  -1   8  -1    1.77    0.12
   1   8   1    1.71    0.10
  -1   8  -1    1.64    0.05
  -2  -8  -1    3.72    0.11
   2  -8   1    3.65    0.18
   2  -8   1    3.84    0.15
   2  -8   1    3.58    0.18
  -2  -8  -1    3.90    0.19
   2  -8   1    3.59    0.12
   2   8   1    3.52    0.12
  -2   8  -1    3.65    0.12
   2   8   1    3.53    0.10
  -2   8  -1    3.65    0.20
   2   8   1    3.85    0.15
   2   8   1    3.75    0.18
   2   8   1    3.74    0.17
  -2   8  -1    3.63    0.12
   3  -8   1    1.50    0.13
  -3  -8  -1    1.18    0.14
   3  -8   1    1.09    0.09
  -3  -8  -1    1.07    0.07
   3  -8   1    1.10    0.10
   3  -8   1    1.07    0.13
  -3  -8  -1    1.24    0.12
   3   8   1    1.25    0.09
   3   8   1    1.39    0.13
  -3   8  -1    1.18    0.09
   3   8   1    1.18    0.07
   3   8   1    1.13    0.14
  -3   8  -1    1.23    0.09
   3   8   1    1.13    0.08
  -4  -8  -1    0.66    0.07
  -4  -8  -1    0.52    0.11
   4  -8   1    0.61    0.10
  -4  -8  -1    0.64    0.10
   4  -8   1    0.78    0.11
   4  -8   1    0.68    0.09
  -4  -8  -1    0.65    0.07
   4  -8   1    0.69    0.09
   4   8   1    0.81    0.11
  -4   8  -1    0.71    0.08
  -4   8  -1    0.68    0.08
   4   8   1    0.76    0.11
   4   8   1    0.66    0.07
   4   8   1    0.67    0.07
   5  -8   1    3.37    0.17
  -5  -8  -1    3.24    0.20
   5  -8   1    3.18    0.18
   5  -8   1    3.10    0.20
  -5  -8  -1    3.26    0.20
  -5  -8  -1    3.28    0.17
   5  -8   1    3.14    0.18
  -5  -8  -1    3.19    0.15
   5   8   1    3.48    0.16
   5   8   1    3.02    0.20
   5   8   1    3.19    0.15
  -5   8  -1    3.28    0.17
  -5   8  -1    3.41    0.18
  -6  -8  -1    2.68    0.20
   6  -8   1    2.34    0.20
   6  -8   1    2.63    0.18
   6  -8   1    2.52    0.20
  -6  -8  -1    2.23    0.17
  -6  -8  -1    2.41    0.17
  -6  -8  -1    2.72    0.17
  -6   8  -1    2.47    0.18
   6   8   1    2.42    0.15
   6   8   1    2.72    0.17
  -6   8  -1    2.53    0.19
   6   8   1    2.47    0.19
  -7  -8  -1    1.61    0.17
  -7  -8  -1    1.67    0.18
   7  -8   1    1.80    0.22
   7  -8   1    1.56    0.20
  -7  -8  -1    1.95    0.19
  -7  -8  -1    1.79    0.17
   7  -8   1    1.59    0.17
   7   8   1    1.61    0.19
  -7   8  -1    1.60    0.19
   7   8   1    1.58    0.17
   7   8   1    1.78    0.19
  -7   8  -1    1.99    0.21
  -8  -8  -1    3.01    0.24
  -8  -8  -1    3.46    0.24
   8  -8   1    2.97    0.28
  -8  -8  -1    2.24    0.26
   8  -8   1    3.38    0.32
  -8  -8  -1    2.99    0.24
  -8   8  -1    3.03    0.24
   8   8   1    2.99    0.23
   8   8   1    3.58    0.27
  -8   8  -1    3.13    0.24
   9  -8   1    0.13    0.17
  -9  -8  -1   -0.10    0.15
  -9  -8  -1   -0.03    0.18
   9  -8   1    0.07    0.19
  -9  -8  -1    0.19    0.22
  -9   8  -1   -0.42    0.17
   9   8   1    0.30    0.19
  -9   8  -1   -0.01    0.20
 -10  -8  -1    0.05    0.19
  10  -8   1    0.28    0.28
 -10  -8  -1    0.17    0.19
  10  -8   1    0.46    0.19
 -10   8  -1    0.27    0.20
 -10   8  -1    0.36    0.24
  10   8   1    0.04    0.20
  10   8   1    0.28    0.23
 -11  -8  -1    0.05    0.32
  11  -8   1    0.59    0.34
  11  -8   1    0.21    0.24
 -11  -8  -1    0.35    0.29
  11   8   1    0.03    0.14
  11  -9  -1    0.01    0.26
 -11  -9   1   -0.32    0.24
  11  -9  -1    0.09    0.30
 -11   9   1    0.22    0.25
 -10  -9   1   -0.11    0.20
 -10  -9   1    0.23    0.21
  10  -9  -1   -0.04    0.20
  10  -9  -1   -0.18    0.31
 -10   9   1    0.07    0.26
  10   9  -1    0.44    0.22
 -10   9   1    0.39    0.18
  -9  -9   1    0.15    0.16
   9  -9  -1    0.17    0.22
  -9  -9   1   -0.49    0.21
  -9  -9   1    0.37    0.18
   9  -9  -1    0.16    0.18
  -9   9   1    0.07    0.20
  -9   9   1    0.28    0.16
   9   9  -1   -0.09    0.16
   9   9  -1    0.24    0.18
  -8  -9   1    0.60    0.16
   8  -9  -1    0.40    0.17
  -8  -9   1    0.88    0.20
   8  -9  -1    0.70    0.18
  -8  -9   1    0.65    0.19
   8  -9  -1    0.65    0.17
  -8  -9   1    0.64    0.15
  -8   9   1    0.91    0.16
  -8   9   1    0.61    0.18
   8   9  -1    0.75    0.16
   8   9  -1    0.47    0.15
   7  -9  -1   -0.02    0.12
  -7  -9   1   -0.01    0.10
  -7  -9   1   -0.03    0.12
  -7  -9   1    0.19    0.16
   7  -9  -1    0.09    0.13
   7  -9  -1    0.13    0.15
   7  -9  -1   -0.01    0.09
  -7  -9   1    0.09    0.12
   7   9  -1   -0.01    0.13
  -7   9   1    0.03    0.11
   7   9  -1    0.08    0.14
  -7   9   1    0.36    0.14
   7   9  -1   -0.19    0.10
   6  -9  -1    0.89    0.15
  -6  -9   1    0.79    0.13
   6  -9  -1    0.73    0.14
  -6  -9   1    0.64    0.10
  -6  -9   1    0.67    0.11
   6  -9  -1    0.55    0.12
  -6  -9   1    0.62    0.15
   6  -9  -1    0.71    0.13
   6   9  -1    0.84    0.11
  -6   9   1    0.76    0.13
  -6   9   1    0.74    0.14
   6   9  -1    0.69    0.10
   6   9  -1    0.74    0.15
   6   9  -1    0.77    0.15
   5  -9  -1    2.47    0.18
  -5  -9   1    2.52    0.21
   5  -9  -1    2.25    0.16
   5  -9  -1    2.44    0.19
  -5  -9   1    2.93    0.19
  -5  -9   1    2.75    0.15
   5  -9  -1    2.44    0.17
  -5  -9   1    2.45    0.15
   5   9  -1    2.67    0.15
   5   9  -1    2.90    0.21
   5   9  -1    2.34    0.20
  -5   9   1    2.44    0.17
   5   9  -1    2.52    0.14
  -5   9   1    2.87    0.16
  -4  -9   1    0.21    0.12
  -4  -9   1    0.27    0.06
   4  -9  -1    0.30    0.07
  -4  -9   1    0.45    0.10
   4  -9  -1    0.31    0.11
   4  -9  -1    0.32    0.09
   4   9  -1    0.31    0.06
   4   9  -1    0.37    0.11
   4   9  -1    0.33    0.08
   4   9  -1    0.30    0.05
  -4   9   1    0.24    0.07
  -4   9   1    0.18    0.07
   4   9  -1    0.25    0.10
  -3  -9   1    2.40    0.09
   3  -9  -1    2.62    0.16
   3  -9  -1    2.42    0.18
  -3  -9   1    2.49    0.16
   3  -9  -1    2.49    0.12
   3  -9  -1    2.58    0.12
  -3  -9   1    2.40    0.09
  -3  -9   1    2.43    0.17
   3   9  -1    2.39    0.17
  -3   9   1    2.59    0.11
   3   9  -1    2.42    0.09
   3   9  -1    2.49    0.09
   3   9  -1    2.31    0.18
   3   9  -1    2.49    0.14
  -3   9   1    2.55    0.12
   2  -9  -1    5.29    0.16
   2  -9  -1    5.54    0.16
   2  -9  -1    5.40    0.19
   2  -9  -1    5.41    0.23
   2  -9  -1    5.43    0.23
   2   9  -1    5.49    0.22
   2   9  -1    5.29    0.23
  -2   9   1    5.31    0.16
  -2   9   1    5.40    0.15
   2   9  -1    5.57    0.23
   1  -9  -1    0.18    0.08
   1  -9  -1    0.15    0.02
   1  -9  -1    0.11    0.02
   1  -9  -1    0.17    0.06
  -1   9   1    0.17    0.09
   1   9  -1    0.11    0.12
   1   9  -1    0.14    0.07
   1   9  -1    0.06    0.06
   1   9  -1    0.13    0.09
  -1   9   1    0.15    0.11
  -1   9   1    0.00    0.08
   1   9  -1    0.12    0.09
   0  -9  -1    0.68    0.10
   0  -9   1    0.85    0.10
   0  -9  -1    0.82    0.10
   0  -9   1    0.70    0.10
   0   9   1    0.73    0.10
   0   9   1    0.77    0.10
   0   9  -1    0.82    0.11
   0   9   1    0.57    0.11
   0   9  -1    0.79    0.11
   0   9  -1    0.56    0.10
   0   9   1    0.71    0.11
   1  -9   1    1.73    0.14
  -1  -9  -1    2.01    0.12
   1  -9   1    1.83    0.14
  -1   9  -1    1.94    0.16
   1   9   1    1.86    0.14
   1   9   1    1.82    0.13
   1   9   1    1.87    0.17
   1   9   1    1.82    0.15
  -1   9  -1    1.79    0.14
  -1   9  -1    1.87    0.16
   1   9   1    2.04    0.12
   2  -9   1    2.12    0.09
   2  -9   1    2.22    0.16
   2  -9   1    1.90    0.13
   2  -9   1    2.15    0.09
  -2  -9  -1    2.33    0.18
  -2  -9  -1    2.13    0.06
   2  -9   1    2.15    0.15
   2   9   1    2.32    0.18
   2   9   1    2.27    0.16
   2   9   1    2.17    0.12
  -2   9  -1    2.10    0.08
  -2   9  -1    2.23    0.09
   2   9   1    2.10    0.16
  -2   9  -1    2.25    0.16
   3  -9   1    0.13    0.07
  -3  -9  -1    0.13    0.04
   3  -9   1    0.12    0.08
   3  -9   1    0.11    0.05
  -3  -9  -1    0.30    0.11
  -3  -9  -1    0.12    0.04
   3  -9   1    0.10    0.06
  -3   9  -1    0.20    0.05
   3   9   1    0.12    0.04
   3   9   1    0.13    0.07
  -3   9  -1    0.08    0.05
   3   9   1    0.14    0.07
   3   9   1    0.13    0.10
   3   9   1    0.11    0.04
   4  -9   1    4.34    0.18
  -4  -9  -1    4.07    0.19
   4  -9   1    4.07    0.21
   4  -9   1    4.04    0.22
  -4  -9  -1    3.90    0.23
  -4   9  -1    4.12    0.17
   4   9   1    3.96    0.14
  -4   9  -1    4.38    0.17
   4   9   1    4.37    0.16
   4   9   1    4.13    0.21
   4   9   1    4.37    0.23
  -5  -9  -1    3.39    0.19
   5  -9   1    3.29    0.19
   5  -9   1    2.89    0.19
  -5  -9  -1    3.25    0.23
   5  -9   1    2.71    0.17
  -5  -9  -1    3.19    0.15
  -5  -9  -1    3.08    0.16
   5  -9   1    2.95    0.19
   5   9   1    3.29    0.21
  -5   9  -1    3.17    0.17
  -5   9  -1    3.17    0.17
   5   9   1    3.32    0.15
   5   9   1    3.19    0.16
   5   9   1    2.52    0.19
  -6  -9  -1    1.25    0.15
  -6  -9  -1    1.44    0.15
   6  -9   1    1.08    0.14
   6  -9   1    1.06    0.14
   6  -9   1    1.34    0.17
  -6  -9  -1    1.29    0.15
   6  -9   1    1.10    0.15
  -6  -9  -1    1.31    0.18
  -6   9  -1    1.28    0.16
  -6   9  -1    1.24    0.14
   6   9   1    1.07    0.13
   6   9   1    1.23    0.16
   6   9   1    1.29    0.16
  -7  -9  -1    0.74    0.12
   7  -9   1    0.33    0.15
  -7  -9  -1    0.71    0.18
   7  -9   1    0.35    0.14
   7  -9   1    0.71    0.13
  -7  -9  -1    0.78    0.13
  -7  -9  -1    0.50    0.13
   7  -9   1    0.37    0.17
  -7   9  -1    0.55    0.13
   7   9   1    0.78    0.15
   7   9   1    0.41    0.11
   7   9   1    0.65    0.15
  -7   9  -1    0.44    0.14
   8  -9   1    1.25    0.31
  -8  -9  -1    1.26    0.17
   8  -9   1    1.01    0.19
  -8  -9  -1    0.99    0.17
  -8  -9  -1    1.18    0.21
  -8  -9  -1    1.17    0.21
   8  -9   1    1.10    0.20
  -8   9  -1    1.27    0.18
  -8   9  -1    0.94    0.17
   8   9   1    1.56    0.20
   8   9   1    1.21    0.16
   8   9   1    0.88    0.17
  -9  -9  -1    0.19    0.17
  -9  -9  -1    0.07    0.19
   9  -9   1    0.25    0.19
   9  -9   1    0.42    0.22
   9   9   1    0.61    0.12
  -9   9  -1    0.07    0.19
  -9   9  -1    0.29    0.16
   9   9   1    0.34    0.22
   9   9   1    0.42    0.16
 -10  -9  -1   -0.26    0.20
  10  -9   1    0.31    0.31
 -10  -9  -1    0.14    0.19
  10  -9   1   -0.28    0.22
  10   9   1    0.10    0.22
 -10   9  -1   -0.21    0.17
  10   9   1   -0.25    0.20
 -10   9  -1   -0.44    0.25
 -11  -9  -1   -0.01    0.24
  11  -9   1    0.22    0.34
  11  -9   1   -0.08    0.26
 -11   9  -1   -0.14    0.26
  10 -10  -1    0.12    0.18
  10 -10  -1    0.05    0.24
 -10 -10   1    0.38    0.28
  10 -10  -1   -0.15    0.39
  10  10  -1    0.07    0.21
 -10  10   1   -0.04    0.13
   9 -10  -1    0.18    0.16
   9 -10  -1    0.19    0.20
  -9 -10   1    0.22    0.19
   9 -10  -1    0.00    0.22
  -9 -10   1    0.21    0.17
   9  10  -1   -0.05    0.17
   9  10  -1   -0.06    0.18
  -9  10   1    0.20    0.18
  -9  10   1    0.07    0.21
   9  10  -1   -0.06    0.26
   8 -10  -1    0.09    0.12
  -8 -10   1    0.04    0.19
  -8 -10   1    0.25    0.14
  -8 -10   1    0.22    0.25
   8 -10  -1    0.12    0.24
   8 -10  -1   -0.01    0.19
   8  10  -1   -0.11    0.12
   8  10  -1   -0.03    0.14
  -8  10   1    0.15    0.15
  -8  10   1    0.29    0.31
  -7 -10   1    0.10    0.20
  -7 -10   1    0.23    0.12
   7 -10  -1    0.23    0.14
  -7 -10   1    0.19    0.12
   7 -10  -1    0.14    0.15
  -7 -10   1    0.17    0.19
   7 -10  -1   -0.08    0.15
   7 -10  -1    0.25    0.12
  -7  10   1    0.18    0.14
   7  10  -1    0.23    0.14
   7  10  -1    0.21    0.15
  -7  10   1    0.20    0.13
   7  10  -1    0.15    0.10
   7  10  -1    0.39    0.16
   6 -10  -1    0.12    0.11
   6 -10  -1    0.18    0.14
  -6 -10   1   -0.16    0.15
  -6 -10   1    0.10    0.14
   6 -10  -1    0.12    0.11
   6 -10  -1   -0.01    0.12
  -6 -10   1    0.02    0.09
  -6  10   1    0.07    0.12
   6  10  -1    0.10    0.10
   6  10  -1    0.09    0.14
  -6  10   1   -0.02    0.12
   6  10  -1    0.19    0.08
   6  10  -1    0.19    0.12
   5 -10  -1    1.19    0.15
  -5 -10   1    1.15    0.12
  -5 -10   1    0.94    0.12
   5 -10  -1    1.06    0.13
  -5 -10   1    1.61    0.19
  -5 -10   1    1.29    0.19
   5 -10  -1    1.43    0.17
   5 -10  -1    1.31    0.17
   5  10  -1    1.16    0.17
   5  10  -1    1.52    0.17
  -5  10   1    1.24    0.13
   5  10  -1    1.06    0.12
   5  10  -1    1.14    0.11
  -5  10   1    1.15    0.14
  -4 -10   1    2.68    0.12
   4 -10  -1    2.74    0.20
   4 -10  -1    2.99    0.16
   4 -10  -1    2.83    0.22
   4 -10  -1    2.61    0.15
  -4 -10   1    3.27    0.23
  -4 -10   1    2.84    0.19
  -4  10   1    2.66    0.14
  -4  10   1    2.86    0.15
   4  10  -1    2.83    0.16
   4  10  -1    2.78    0.22
   4  10  -1    2.87    0.12
   4  10  -1    2.59    0.24
   4  10  -1    2.67    0.11
  -3 -10   1    5.27    0.15
   3 -10  -1    5.36    0.21
   3 -10  -1    5.61    0.25
   3 -10  -1    5.68    0.25
  -3 -10   1    5.68    0.15
   3  10  -1    5.43    0.21
   3  10  -1    5.34    0.26
  -3  10   1    5.59    0.18
  -3  10   1    6.16    0.19
   3  10  -1    5.63    0.26
   2 -10  -1    0.49    0.10
   2 -10  -1    0.48    0.05
   2 -10  -1    0.29    0.10
   2 -10  -1    0.42    0.05
  -2  10   1    0.40    0.04
   2  10  -1    0.44    0.11
   2  10  -1    0.48    0.10
   2  10  -1    0.26    0.12
  -2  10   1    0.43    0.12
  -2  10   1    0.49    0.07
   2  10  -1    0.40    0.10
   2  10  -1    0.55    0.10
   1 -10  -1    0.34    0.09
   1 -10  -1    0.30    0.09
   1  10  -1    0.29    0.10
   1  10  -1    0.26    0.09
  -1  10   1    0.33    0.09
   1  10  -1    0.21    0.11
  -1  10   1    0.20    0.11
  -1  10   1    0.26    0.10
   1  10  -1    0.31    0.09
   0 -10  -1    0.03    0.06
   0 -10   1    0.11    0.08
   0 -10   1    0.08    0.07
   0 -10  -1   -0.13    0.07
   0  10   1    0.09    0.08
   0  10  -1    0.12    0.07
   0  10  -1   -0.11    0.08
   0  10  -1   -0.04    0.09
   0  10   1    0.24    0.10
   0  10  -1    0.11    0.11
   0  10   1    0.10    0.08
   0  10   1    0.04    0.10
   1 -10   1    0.27    0.09
  -1 -10  -1    0.11    0.08
   1 -10   1    0.21    0.08
  -1  10  -1    0.29    0.11
   1  10   1    0.20    0.09
   1  10   1    0.15    0.10
  -1  10  -1    0.24    0.10
   1  10   1    0.21    0.08
   1  10   1    0.19    0.10
  -1  10  -1    0.18    0.11
  -1  10  -1    0.14    0.07
   2 -10   1   -0.08    0.08
   2 -10   1   -0.01    0.04
   2 -10   1    0.06    0.04
   2 -10   1    0.07    0.07
   2 -10   1    0.00    0.08
   2  10   1   -0.16    0.07
  -2  10  -1   -0.03    0.04
  -2  10  -1   -0.05    0.11
   2  10   1    0.15    0.10
   2  10   1    0.08    0.08
   2  10   1    0.24    0.12
   3 -10   1    1.55    0.16
  -3 -10  -1    1.49    0.08
   3 -10   1    1.59    0.18
   3 -10   1    1.49    0.17
  -3 -10  -1    1.59    0.20
   3  10   1    1.58    0.07
   3  10   1    1.55    0.07
   3  10   1    1.86    0.17
   3  10   1    1.58    0.18
  -3  10  -1    1.64    0.11
   3  10   1    1.52    0.13
  -3  10  -1    1.49    0.10
  -4 -10  -1   -0.10    0.13
   4 -10   1    0.18    0.08
  -4 -10  -1    0.12    0.06
  -4 -10  -1    0.12    0.11
   4 -10   1    0.14    0.08
   4 -10   1    0.11    0.10
   4 -10   1    0.19    0.09
  -4 -10  -1    0.08    0.06
  -4  10  -1    0.19    0.07
  -4  10  -1    0.23    0.07
   4  10   1    0.10    0.06
   4  10   1    0.15    0.09
   4  10   1    0.18    0.10
   4  10   1    0.20    0.12
   4  10   1    0.10    0.05
   5 -10   1    0.01    0.13
  -5 -10  -1    0.16    0.15
  -5 -10  -1   -0.08    0.07
  -5 -10  -1    0.01    0.07
   5 -10   1    0.13    0.09
   5 -10   1    0.06    0.10
  -5 -10  -1    0.09    0.11
   5 -10   1   -0.02    0.09
   5  10   1    0.07    0.06
   5  10   1    0.01    0.08
  -5  10  -1    0.00    0.08
   5  10   1    0.18    0.14
  -5  10  -1   -0.04    0.07
   5  10   1   -0.20    0.10
   6 -10   1    1.62    0.18
  -6 -10  -1    1.81    0.17
  -6 -10  -1    2.11    0.19
   6 -10   1    1.83    0.20
  -6 -10  -1    2.18    0.23
   6 -10   1    1.83    0.32
   6 -10   1    2.41    0.21
  -6  10  -1    1.96    0.20
   6  10   1    1.90    0.21
  -6  10  -1    1.97    0.19
   6  10   1    2.00    0.15
   6  10   1    1.94    0.18
   6  10   1    2.22    0.23
  -7 -10  -1    1.43    0.15
  -7 -10  -1    1.41    0.18
  -7 -10  -1    1.29    0.15
   7 -10   1    1.31    0.17
   7 -10   1    1.25    0.18
  -7 -10  -1    0.99    0.21
   7 -10   1    1.04    0.18
   7 -10   1    1.31    0.19
   7  10   1    1.22    0.18
   7  10   1    1.72    0.18
  -7  10  -1    1.20    0.17
   7  10   1    1.18    0.19
  -7  10  -1    1.47    0.17
   8 -10   1    0.11    0.13
  -8 -10  -1    0.32    0.15
  -8 -10  -1    0.08    0.18
   8 -10   1    0.26    0.19
  -8 -10  -1   -0.07    0.13
   8 -10   1   -0.03    0.17
  -8  10  -1    0.05    0.22
  -8  10  -1    0.00    0.14
   8  10   1    0.01    0.15
   8  10   1    0.00    0.10
   8  10   1    0.10    0.14
   9 -10   1    0.07    0.23
   9 -10   1   -0.32    0.20
  -9 -10  -1    0.27    0.22
   9 -10   1    0.38    0.16
  -9 -10  -1   -0.19    0.17
   9  10   1   -0.01    0.18
  -9  10  -1    0.58    0.22
   9  10   1    0.28    0.19
   9  10   1    0.08    0.10
  -9  10  -1   -0.07    0.19
  10 -10   1    0.36    0.36
 -10 -10  -1    0.40    0.23
  10 -10   1    0.02    0.19
  10 -10   1    0.33    0.24
  10  10   1    0.38    0.23
 -10 -11   1   -0.20    0.25
  10 -11  -1   -0.47    0.25
  10 -11  -1    1.71    0.48
  10 -11  -1   -0.12    0.20
  10  11  -1    0.00    0.14
  -9 -11   1    0.43    0.24
   9 -11  -1   -0.30    0.23
   9 -11  -1    0.18    0.23
   9 -11  -1    0.33    0.17
   9  11  -1    0.18    0.17
  -9  11   1    0.04    0.20
  -8 -11   1    0.48    0.21
   8 -11  -1    0.29    0.19
  -8 -11   1    0.19    0.15
   8 -11  -1    0.01    0.19
   8 -11  -1    0.07    0.14
   8  11  -1    0.12    0.24
   8  11  -1    0.06    0.15
   8  11  -1    0.19    0.15
  -8  11   1    0.03    0.18
  -8  11   1    0.15    0.17
   7 -11  -1    0.29    0.17
  -7 -11   1    0.10    0.19
  -7 -11   1   -0.01    0.22
   7 -11  -1    0.23    0.18
  -7 -11   1    0.16    0.13
  -7 -11   1    0.23    0.12
   7 -11  -1    0.11    0.13
  -7  11   1    0.14    0.15
  -7  11   1   -0.08    0.12
   7  11  -1    0.37    0.09
   7  11  -1    0.18    0.11
   6 -11  -1    0.01    0.15
   6 -11  -1    0.21    0.12
   6 -11  -1   -0.29    0.12
  -6 -11   1   -0.02    0.20
  -6 -11   1    0.00    0.09
  -6 -11   1    0.16    0.10
  -6 -11   1    0.15    0.21
   6 -11  -1   -0.06    0.13
  -6  11   1    0.09    0.12
   6  11  -1    0.31    0.12
   6  11  -1   -0.02    0.08
  -6  11   1    0.03    0.11
   6  11  -1    0.09    0.10
   6  11  -1    0.14    0.15
  -5 -11   1    0.17    0.15
   5 -11  -1    0.07    0.11
   5 -11  -1    0.10    0.14
  -5 -11   1    0.31    0.18
   5 -11  -1    0.16    0.10
  -5 -11   1    0.09    0.07
  -5 -11   1    0.09    0.08
   5 -11  -1    0.09    0.11
  -5  11   1    0.19    0.08
   5  11  -1   -0.01    0.13
   5  11  -1    0.09    0.08
   5  11  -1    0.12    0.06
  -5  11   1    0.02    0.09
   5  11  -1    0.17    0.15
   4 -11  -1    0.07    0.12
   4 -11  -1    0.22    0.11
  -4 -11   1    0.16    0.05
   4 -11  -1    0.23    0.08
   4 -11  -1    0.19    0.08
  -4 -11   1    0.21    0.15
   4  11  -1    0.42    0.11
   4  11  -1    0.06    0.15
   4  11  -1    0.19    0.05
  -4  11   1    0.13    0.07
  -4  11   1    0.29    0.08
   4  11  -1    0.10    0.11
   4  11  -1    0.28    0.05
   3 -11  -1    0.39    0.07
   3 -11  -1    0.27    0.11
   3 -11  -1    0.38    0.12
   3 -11  -1    0.34    0.07
   3 -11  -1    0.55    0.10
   3  11  -1    0.40    0.11
  -3  11   1    0.40    0.06
   3  11  -1    0.23    0.11
  -3  11   1    0.41    0.06
   3  11  -1    0.33    0.12
   2 -11  -1    1.83    0.08
   2 -11  -1    1.68    0.19
   2 -11  -1    2.11    0.18
   2 -11  -1    1.76    0.08
  -2  11   1    1.72    0.21
   2  11  -1    1.77    0.18
   2  11  -1    1.80    0.16
  -2  11   1    1.89    0.07
   2  11  -1    1.72    0.18
  -2  11   1    1.75    0.06
   2  11  -1    1.76    0.16
   2  11  -1    1.71    0.18
   1 -11  -1    1.97    0.18
   1 -11  -1    2.31    0.17
  -1  11   1    1.93    0.20
   1  11  -1    2.24    0.19
  -1  11   1    1.97    0.18
  -1  11   1    1.93    0.19
  -1  11   1    2.09    0.18
   1  11  -1    1.75    0.19
   1  11  -1    1.99    0.16
   1  11  -1    1.79    0.21
   0 -11   1    0.14    0.09
   0 -11   1    0.05    0.08
   0 -11  -1    0.13    0.10
   0  11   1    0.07    0.11
   0  11  -1    0.02    0.10
   0  11   1    0.10    0.10
   0  11  -1    0.09    0.12
   0  11  -1    0.08    0.11
   0  11   1    0.13    0.09
   0  11  -1    0.14    0.10
   0  11   1    0.02    0.12
   1 -11   1    0.22    0.11
   1 -11   1    0.23    0.10
   1  11   1    0.29    0.12
   1  11   1    0.24    0.11
  -1  11  -1    0.27    0.13
  -1  11  -1    0.14    0.11
  -1  11  -1    0.11    0.11
   1  11   1    0.37    0.12
   1  11   1    0.11    0.10
  -1  11  -1    0.34    0.12
   2 -11   1    0.89    0.07
   2 -11   1    1.02    0.14
   2 -11   1    0.77    0.13
   2 -11   1    0.77    0.06
   2  11   1    1.02    0.15
   2  11   1    1.14    0.14
  -2  11  -1    0.84    0.15
   2  11   1    0.94    0.12
   2  11   1    0.87    0.12
  -2  11  -1    0.87    0.14
   2  11   1    0.97    0.14
   3 -11   1    1.00    0.13
   3 -11   1    0.91    0.10
   3 -11   1    1.04    0.16
   3 -11   1    0.85    0.14
   3 -11   1    0.93    0.10
  -3 -11  -1    1.12    0.18
   3  11   1    0.95    0.12
   3  11   1    0.84    0.14
  -3  11  -1    1.02    0.09
  -3  11  -1    0.99    0.08
   3  11   1    0.99    0.16
  -4 -11  -1    0.09    0.06
  -4 -11  -1   -0.05    0.05
   4 -11   1    0.23    0.10
  -4 -11  -1    0.17    0.17
   4 -11   1   -0.03    0.07
   4 -11   1    0.00    0.08
   4 -11   1    0.16    0.12
   4  11   1   -0.06    0.12
   4  11   1    0.01    0.05
  -4  11  -1    0.01    0.07
   4  11   1    0.07    0.09
  -4  11  -1   -0.01    0.07
   4  11   1    0.04    0.11
  -5 -11  -1    0.13    0.07
   5 -11   1   -0.07    0.11
  -5 -11  -1    0.07    0.12
   5 -11   1   -0.03    0.10
   5 -11   1    0.00    0.10
   5 -11   1   -0.15    0.12
  -5 -11  -1   -0.08    0.18
   5  11   1    0.05    0.08
  -5  11  -1   -0.06    0.08
   5  11   1    0.05    0.06
   5  11   1    0.06    0.16
   5  11   1    0.18    0.11
  -5  11  -1    0.00    0.09
   6 -11   1   -0.04    0.15
  -6 -11  -1    0.15    0.20
  -6 -11  -1    0.21    0.10
   6 -11   1    0.08    0.13
   6 -11   1    0.10    0.13
  -6 -11  -1    0.05    0.10
  -6 -11  -1   -0.07    0.15
   6 -11   1    0.28    0.13
   6  11   1    0.05    0.15
   6  11   1    0.53    0.15
   6  11   1    0.16    0.08
  -6  11  -1    0.09    0.11
   6  11   1    0.18    0.11
  -7 -11  -1    0.07    0.13
  -7 -11  -1    0.09    0.22
  -7 -11  -1    0.07    0.12
   7 -11   1    0.03    0.14
  -7 -11  -1   -0.09    0.24
   7 -11   1    0.03    0.17
   7 -11   1    0.00    0.16
   7 -11   1    0.07    0.18
   7  11   1    0.13    0.13
  -7  11  -1    0.10    0.14
  -7  11  -1   -0.13    0.11
   7  11   1    0.14    0.10
  -8 -11  -1    0.22    0.15
   8 -11   1    0.39    0.16
   8 -11   1    0.68    0.21
   8 -11   1    0.78    0.21
  -8 -11  -1    0.52    0.34
  -8  11  -1    0.28    0.19
   8  11   1    0.66    0.11
   8  11   1    0.55    0.28
   8  11   1    0.81    0.17
  -8  11  -1    0.63    0.16
  -9 -11  -1    0.11    0.22
   9 -11   1    0.22    0.25
   9 -11   1   -0.25    0.19
   9 -11   1    0.15    0.22
   9  11   1    0.47    0.19
  -9  11  -1    0.31    0.19
 -10 -11  -1   -0.08    0.31
  10 -11   1    0.36    0.28
  10 -11   1   -0.45    0.20
  10  11   1   -0.03    0.13
  -9 -12   1    0.16    0.29
   9 -12  -1   -0.18    0.18
   9 -12  -1   -0.10    0.24
  -9  12   1   -0.30    0.15
   9  12  -1   -0.04    0.19
   8 -12  -1    0.18    0.20
  -8 -12   1    0.23    0.23
   8 -12  -1   -0.12    0.17
   8 -12  -1   -0.14    0.19
   8  12  -1   -0.20    0.16
  -8  12   1    0.02    0.16
   7 -12  -1    0.24    0.18
   7 -12  -1    0.03    0.15
  -7 -12   1    0.06    0.23
  -7 -12   1    0.18    0.12
  -7 -12   1   -0.17    0.12
   7 -12  -1   -0.39    0.19
   7  12  -1    0.21    0.14
  -7  12   1    0.07    0.15
  -7  12   1   -0.17    0.13
   7  12  -1   -0.08    0.10
   6 -12  -1    0.16    0.17
   6 -12  -1    0.23    0.14
   6 -12  -1    0.01    0.14
  -6 -12   1    0.35    0.20
   6 -12  -1   -0.01    0.13
  -6 -12   1    0.32    0.26
  -6 -12   1    0.25    0.12
   6  12  -1    0.10    0.09
   6  12  -1    0.23    0.10
  -6  12   1    0.21    0.12
   6  12  -1    0.24    0.08
  -6  12   1    0.18    0.13
   5 -12  -1    3.19    0.20
  -5 -12   1    3.10    0.15
   5 -12  -1    3.31    0.31
  -5 -12   1    2.69    0.33
  -5 -12   1    3.09    0.15
   5 -12  -1    3.10    0.28
   5 -12  -1    3.23    0.20
  -5  12   1    3.11    0.18
   5  12  -1    3.10    0.14
   5  12  -1    2.84    0.13
  -5  12   1    3.53    0.21
   5  12  -1    2.56    0.20
   5  12  -1    3.71    0.27
   4 -12  -1    0.79    0.10
   4 -12  -1    1.08    0.15
  -4 -12   1    0.83    0.06
   4 -12  -1    0.94    0.17
   4 -12  -1    1.33    0.20
  -4  12   1    0.83    0.09
   4  12  -1    1.20    0.15
   4  12  -1    0.60    0.15
   4  12  -1    0.76    0.14
  -4  12   1    0.89    0.10
   3 -12  -1    0.48    0.12
   3 -12  -1    0.42    0.15
   3 -12  -1    0.26    0.07
   3 -12  -1    0.33    0.06
   3  12  -1    0.45    0.13
   3  12  -1    0.38    0.14
  -3  12   1    0.34    0.19
  -3  12   1    0.36    0.05
   3  12  -1    0.62    0.16
   3  12  -1    0.36    0.12
   2 -12  -1    0.05    0.14
   2 -12  -1    0.00    0.09
   2  12  -1   -0.09    0.11
   2  12  -1   -0.05    0.16
   2  12  -1    0.03    0.11
   2  12  -1    0.03    0.14
  -2  12   1    0.08    0.16
   2  12  -1   -0.13    0.10
   1 -12  -1    0.22    0.09
   1 -12  -1   -0.07    0.11
   1  12  -1    0.11    0.14
   1  12  -1    0.14    0.14
   1  12  -1    0.12    0.12
   1  12  -1    0.14    0.11
  -1  12   1    0.22    0.13
  -1  12   1    0.27    0.11
  -1  12   1    0.03    0.13
  -1  12   1    0.21    0.19
   0 -12   1    0.14    0.11
   0 -12   1   -0.04    0.09
   0 -12  -1    0.04    0.10
   0  12   1    0.19    0.10
   0  12  -1   -0.01    0.15
   0  12  -1    0.13    0.15
   0  12  -1    0.03    0.10
   0  12  -1    0.07    0.12
   0  12   1    0.13    0.19
   0  12   1    0.03    0.13
   0  12   1   -0.01    0.12
   1 -12   1   -0.02    0.08
   1 -12   1   -0.02    0.11
   1  12   1    0.35    0.13
   1  12   1    0.03    0.14
  -1  12  -1    0.23    0.19
  -1  12  -1    0.16    0.12
   1  12   1    0.25    0.11
  -1  12  -1    0.25    0.14
  -1  12  -1    0.06    0.14
   1  12   1    0.18    0.17
   2 -12   1    0.35    0.15
   2 -12   1    0.47    0.13
   2  12   1    0.76    0.13
   2  12   1    0.48    0.12
   2  12   1    0.13    0.14
  -2  12  -1    0.29    0.15
   2  12   1    0.32    0.11
   2  12   1    0.75    0.20
  -2  12  -1    0.58    0.19
   3 -12   1    3.07    0.14
   3 -12   1    3.50    0.25
   3 -12   1    3.46    0.24
   3 -12   1    3.24    0.21
   3 -12   1    3.09    0.13
   3  12   1    2.78    0.23
  -3  12  -1    2.87    0.12
   3  12   1    3.22    0.26
   3  12   1    3.17    0.19
   4 -12   1    0.22    0.14
   4 -12   1    0.41    0.16
  -4 -12  -1    0.16    0.19
   4 -12   1    0.34    0.15
   4 -12   1    0.19    0.08
  -4 -12  -1    0.26    0.05
  -4  12  -1    0.26    0.08
   4  12   1    0.24    0.16
   4  12   1    0.43    0.12
   4  12   1    0.19    0.14
  -4  12  -1    0.24    0.07
   5 -12   1    0.59    0.12
  -5 -12  -1    0.42    0.08
   5 -12   1    0.50    0.11
  -5 -12  -1    0.59    0.09
   5 -12   1    0.63    0.17
  -5 -12  -1    0.68    0.21
   5 -12   1    0.61    0.16
   5  12   1    0.62    0.08
  -5  12  -1    0.46    0.10
   5  12   1    0.60    0.10
  -5  12  -1    0.50    0.13
   5  12   1    0.50    0.16
   6 -12   1    1.39    0.17
  -6 -12  -1    1.23    0.37
  -6 -12  -1    1.02    0.12
   6 -12   1    1.72    0.23
  -6 -12  -1    1.24    0.30
   6 -12   1    1.33    0.20
   6 -12   1    0.91    0.15
  -6  12  -1    1.24    0.15
   6  12   1    1.18    0.14
  -6  12  -1    1.40    0.15
   6  12   1    1.02    0.11
   6  12   1    1.77    0.16
  -7 -12  -1    0.02    0.23
   7 -12   1    0.23    0.18
   7 -12   1   -0.04    0.18
   7 -12   1    0.12    0.14
  -7 -12  -1    0.17    0.13
  -7 -12  -1   -0.07    0.13
  -7  12  -1    0.23    0.15
   7  12   1    0.21    0.14
  -7  12  -1   -0.16    0.13
   7  12   1    0.25    0.11
   7  12   1   -0.01    0.19
  -8 -12  -1    0.18    0.23
   8 -12   1   -0.13    0.21
   8 -12   1    0.03    0.16
   8 -12   1   -0.07    0.23
  -8  12  -1   -0.09    0.16
   8  12   1    0.11    0.17
   9 -12   1    0.51    0.26
   9 -12   1    0.19    0.20
  -9 -12  -1    0.68    0.28
   9  12   1    0.24    0.22
   9 -13  -1   -0.20    0.28
   9 -13  -1    0.16    0.22
  -9 -13   1   -0.08    0.27
   9  13  -1   -0.14    0.21
   8 -13  -1    0.11    0.20
   8 -13  -1   -0.05    0.27
  -8 -13   1    0.26    0.26
   8  13  -1    0.33    0.17
  -8  13   1    0.14    0.19
  -7 -13   1   -0.10    0.22
  -7 -13   1    0.24    0.15
   7 -13  -1    0.02    0.18
   7 -13  -1    0.09    0.18
   7 -13  -1    0.00    0.22
   7  13  -1    0.28    0.15
   7  13  -1    0.39    0.13
  -7  13   1    0.10    0.14
   6 -13  -1    0.17    0.15
  -6 -13   1   -0.07    0.09
  -6 -13   1    0.11    0.09
   6 -13  -1    0.06    0.15
   6 -13  -1   -0.41    0.14
   6 -13  -1   -0.21    0.18
   6  13  -1    0.10    0.08
  -6  13   1    0.12    0.12
   6  13  -1    0.08    0.09
  -6  13   1   -0.09    0.12
   5 -13  -1    0.62    0.17
  -5 -13   1    0.42    0.06
   5 -13  -1    0.36    0.12
   5 -13  -1    0.61    0.16
   5 -13  -1    0.35    0.12
   5 -13  -1    0.79    0.20
  -5  13   1    0.73    0.12
   5  13  -1    0.30    0.24
  -5  13   1    0.39    0.10
   4 -13  -1    0.06    0.17
   4 -13  -1   -0.06    0.08
   4 -13  -1    0.11    0.13
   4 -13  -1    0.02    0.13
   4 -13  -1    0.11    0.09
   4  13  -1   -0.14    0.13
   4  13  -1   -0.06    0.09
  -4  13   1    0.03    0.06
  -4  13   1    0.03    0.17
  -4  13   1    0.02    0.07
   3 -13  -1    1.29    0.10
   3 -13  -1    1.15    0.18
   3 -13  -1    1.26    0.09
   3  13  -1    1.90    0.14
   3  13  -1    1.49    0.18
   3  13  -1    1.48    0.23
  -3  13   1    1.39    0.22
   3  13  -1    1.49    0.17
   2 -13  -1    0.49    0.16
   2 -13  -1    0.86    0.18
   2  13  -1    0.66    0.15
  -2  13   1    0.82    0.20
   2  13  -1    0.70    0.17
   2  13  -1    0.69    0.10
   2  13  -1    0.56    0.15
  -2  13   1    0.37    0.17
   1 -13  -1    0.08    0.13
   1 -13  -1    0.03    0.12
  -1  13   1    0.04    0.14
   1  13  -1    0.14    0.11
   1  13  -1   -0.02    0.12
  -1  13   1   -0.01    0.18
  -1  13   1   -0.08    0.12
   1  13  -1   -0.14    0.13
   1  13  -1   -0.03    0.17
   0 -13  -1    0.24    0.12
   0  13   1    0.29    0.11
   0  13   1    0.35    0.13
   0  13  -1    0.22    0.12
   0  13  -1    0.03    0.19
   0  13  -1    0.11    0.15
   0  13   1    0.20    0.14
   0  13  -1    0.09    0.10
   1 -13   1   -0.02    0.13
   1 -13   1    0.02    0.12
  -1  13  -1    0.05    0.14
   1  13   1   -0.26    0.10
  -1  13  -1   -0.09    0.08
   1  13   1    0.02    0.12
   1  13   1    0.05    0.13
  -1  13  -1    0.19    0.13
   2 -13   1   -0.12    0.13
   2 -13   1    0.10    0.11
   2  13   1    0.22    0.13
   2  13   1    0.11    0.12
  -2  13  -1   -0.10    0.07
  -2  13  -1    0.16    0.16
   2  13   1    0.23    0.12
  -2  13  -1    0.09    0.18
   3 -13   1    0.86    0.16
   3 -13   1    0.75    0.08
   3 -13   1    0.74    0.10
   3 -13   1    0.84    0.17
   3  13   1    1.26    0.16
  -3  13  -1    1.01    0.22
   3  13   1    1.03    0.16
   3  13   1    0.79    0.17
   3  13   1    1.19    0.15
   4 -13   1    0.72    0.10
   4 -13   1    0.83    0.17
   4 -13   1    0.80    0.17
   4 -13   1    1.12    0.19
   4 -13   1    0.72    0.10
   4  13   1    1.15    0.14
   4  13   1    0.97    0.15
  -4  13  -1    0.78    0.08
  -4  13  -1    0.92    0.12
  -5 -13  -1   -0.08    0.05
  -5 -13  -1    0.05    0.06
   5 -13   1    0.29    0.17
   5 -13   1    0.02    0.18
   5 -13   1   -0.19    0.14
   5 -13   1   -0.10    0.11
   5 -13   1    0.01    0.11
   5  13   1    0.17    0.16
   5  13   1    0.06    0.05
  -5  13  -1    0.28    0.12
  -5  13  -1   -0.01    0.09
  -6 -13  -1    0.23    0.10
   6 -13   1    0.26    0.14
   6 -13   1    0.25    0.16
  -6 -13  -1    0.10    0.10
   6 -13   1    0.28    0.20
   6 -13   1    0.13    0.16
  -6  13  -1    0.24    0.13
   6  13   1    0.36    0.10
  -6  13  -1    0.21    0.13
   7 -13   1   -0.13    0.19
   7 -13   1    0.69    0.23
  -7 -13  -1    0.58    0.15
   7 -13   1    0.49    0.18
   7  13   1    0.62    0.16
  -7  13  -1    0.49    0.15
   8 -13   1   -0.08    0.24
   8 -13   1    0.10    0.19
  -8 -13  -1    0.29    0.25
  -8  13  -1    0.03    0.18
   8  13   1    0.12    0.17
   9 -13   1    0.09    0.29
   9 -13   1   -0.05    0.22
  -9 -13  -1   -0.15    0.30
   9  13   1   -0.20    0.21
   8 -14  -1    0.15    0.29
  -8 -14   1   -0.14    0.26
   8 -14  -1    0.45    0.22
  -8  14   1    0.08    0.19
   8  14  -1   -0.13    0.17
   7 -14  -1   -0.13    0.24
   7 -14  -1    0.13    0.20
  -7 -14   1    0.11    0.21
  -7  14   1    0.43    0.15
   6 -14  -1   -0.08    0.18
   6 -14  -1    0.20    0.19
   6 -14  -1   -0.06    0.22
   6 -14  -1    0.07    0.21
  -6  14   1   -0.11    0.11
   5 -14  -1    0.25    0.16
   5 -14  -1    0.31    0.18
   5 -14  -1    0.31    0.19
   5 -14  -1    0.47    0.12
  -5  14   1    0.20    0.11
  -5  14   1    0.04    0.10
  -5  14   1   -0.16    0.21
   4 -14  -1    0.49    0.16
   4 -14  -1    0.38    0.09
   4 -14  -1    0.33    0.09
   4 -14  -1    0.38    0.18
   4  14  -1    0.52    0.21
   4  14  -1    0.27    0.16
  -4  14   1    0.35    0.26
  -4  14   1    0.28    0.07
  -4  14   1    0.49    0.07
   3 -14  -1   -0.10    0.15
   3 -14  -1    0.11    0.14
  -3  14   1   -0.09    0.20
   3  14  -1    0.33    0.18
   3  14  -1    0.07    0.17
   2 -14  -1    0.04    0.15
   2 -14  -1   -0.16    0.13
  -2  14   1   -0.18    0.17
   2  14  -1    0.14    0.17
  -2  14   1   -0.14    0.19
   2  14  -1   -0.07    0.14
   2  14  -1   -0.06    0.36
   1 -14  -1    0.16    0.15
  -1  14   1   -0.10    0.18
  -1  14   1    0.24    0.18
   1  14  -1    0.49    0.18
  -1  14   1    0.01    0.13
  -1  14   1    0.14    0.35
   1  14  -1   -0.04    0.16
   1  14  -1   -0.07    0.20
   1  14  -1    0.19    0.17
   0 -14  -1    0.02    0.13
   0  14  -1   -0.35    0.19
   0  14   1   -0.09    0.18
   0  14   1   -0.03    0.15
   0  14   1    0.06    0.20
   0  14  -1    0.01    0.16
   0  14  -1   -0.05    0.17
   0  14  -1   -0.32    0.15
   0  14   1   -0.06    0.13
   1 -14   1   -0.06    0.12
   1 -14   1    0.11    0.14
   1  14   1    0.02    0.21
   1  14   1    0.21    0.14
  -1  14  -1    0.28    0.19
   1  14   1    0.00    0.16
  -1  14  -1    0.01    0.17
   1  14   1    0.26    0.18
   2 -14   1    0.18    0.14
   2 -14   1   -0.04    0.15
   2  14   1   -0.27    0.22
  -2  14  -1    0.39    0.19
  -2  14  -1    0.19    0.21
   2  14   1    0.02    0.15
   2  14   1    0.23    0.17
   2  14   1    0.26    0.17
   3 -14   1   -0.14    0.13
   3 -14   1    0.13    0.17
  -3  14  -1    0.09    0.21
   3  14   1    0.00    0.14
   3  14   1   -0.34    0.13
  -3  14  -1   -0.22    0.25
   3  14   1    0.19    0.25
   4 -14   1    0.23    0.16
   4 -14   1    0.23    0.09
   4 -14   1    0.33    0.18
   4 -14   1    0.18    0.08
   4  14   1    0.29    0.22
  -4  14  -1    0.20    0.06
   4  14   1    0.52    0.16
  -4  14  -1    0.16    0.25
   5 -14   1    0.66    0.19
   5 -14   1    0.21    0.12
   5 -14   1    0.64    0.22
   5 -14   1    0.75    0.21
  -5  14  -1    0.42    0.10
  -5  14  -1    0.65    0.12
   6 -14   1    0.26    0.24
   6 -14   1    0.06    0.19
   6 -14   1    0.81    0.24
   6 -14   1    0.46    0.17
  -6 -14  -1    0.35    0.08
   6  14   1    0.41    0.13
  -6  14  -1    0.38    0.13
   7 -14   1    0.18    0.20
   7 -14   1   -0.03    0.25
   7  14   1    0.09    0.21
  -7  14  -1    0.17    0.15
   8 -14   1    0.20    0.29
   8 -14   1    0.16    0.23
  -8  14  -1    0.33    0.19
   8  14   1    0.39    0.18
   7 -15  -1    0.23    0.29
   7 -15  -1    0.48    0.23
  -7  15   1    0.09    0.16
   6 -15  -1    0.27    0.27
   6 -15  -1   -0.01    0.21
  -6  15   1   -0.11    0.16
  -6  15   1    0.20    0.12
   5 -15  -1    0.00    0.18
   5 -15  -1    0.07    0.12
   5 -15  -1    0.36    0.24
  -5  15   1   -0.10    0.28
   5  15  -1    0.39    0.23
   4 -15  -1    0.00    0.08
   4 -15  -1    0.04    0.20
   4 -15  -1   -0.15    0.17
   4 -15  -1    0.12    0.07
  -4  15   1    0.12    0.26
   4  15  -1    0.02    0.21
   4  15  -1    0.23    0.21
   3 -15  -1    1.58    0.24
   3 -15  -1    0.71    0.19
  -3  15   1    1.38    0.27
   2 -15  -1   -0.22    0.17
   2 -15  -1    0.17    0.16
   2  15  -1    0.53    0.20
  -2  15   1    0.26    0.28
   2  15  -1    0.06    0.21
   1 -15  -1   -0.05    0.16
  -1  15   1   -0.02    0.20
   1  15  -1    0.07    0.24
   1  15  -1    0.01    0.19
   0  15   1    0.11    0.21
   0  15  -1    0.04    0.21
   0  15   1    0.01    0.18
   1 -15   1   -0.17    0.15
  -1  15  -1    0.00    0.22
   1  15   1   -0.28    0.18
   1  15   1   -0.18    0.18
  -1  15  -1    0.15    0.33
   2 -15   1   -0.03    0.16
   2 -15   1   -0.21    0.17
  -2  15  -1   -0.17    0.27
   2  15   1    0.12    0.18
   3 -15   1   -0.04    0.15
   3 -15   1   -0.10    0.17
   3  15   1    0.19    0.17
  -3  15  -1   -0.06    0.22
   4 -15   1   -0.04    0.07
   4 -15   1    0.10    0.18
   4 -15   1    0.05    0.20
   4 -15   1    0.13    0.07
  -4  15  -1   -0.10    0.24
   4  15   1   -0.13    0.22
   4  15   1    0.17    0.17
   5 -15   1    0.09    0.22
   5 -15   1    0.07    0.12
   5 -15   1   -0.15    0.18
  -5  15  -1   -0.62    0.22
   5  15   1    0.18    0.26
   6 -15   1    0.00    0.25
   6 -15   1    0.08    0.36
   6 -15   1    0.39    0.21
  -6  15  -1   -0.05    0.12
   7 -15   1   -0.74    0.27
   7 -15   1    0.12    0.24
  -7  15  -1    0.15    0.16
   6 -16  -1    0.74    0.24
   6 -16  -1    0.56    0.38
  -6  16   1   -0.32    0.29
   6  16  -1    0.72    0.30
   5 -16  -1    0.47    0.27
   5 -16  -1    0.73    0.23
   5  16  -1    0.10    0.27
  -5  16   1    0.85    0.17
   4 -16  -1   -0.14    0.23
   4 -16  -1    0.02    0.19
  -4  16   1    0.20    0.23
   3 -16  -1    0.41    0.19
   3 -16  -1    0.43    0.23
  -3  16   1   -0.09    0.24
   2 -16  -1    0.05    0.21
  -2  16   1   -0.28    0.27
   1 -16  -1    0.07    0.19
   1  16  -1    0.07    0.24
  -1  16   1    0.11    0.23
   0  16  -1    0.28    0.24
   0  16   1    0.25    0.21
   1  16   1    0.38    0.23
  -1  16  -1    0.10    0.24
   2 -16   1    0.34    0.18
   2 -16   1    0.09    0.20
   2  16   1    0.08    0.24
  -2  16  -1    0.54    0.30
   3 -16   1    0.36    0.21
   3 -16   1    0.34    0.19
   3  16   1   -0.40    0.32
  -3  16  -1    0.35    0.26
   4 -16   1    0.05    0.19
   4 -16   1    0.08    0.23
   4  16   1    0.46    0.23
  -4  16  -1    0.38    0.22
   5 -16   1    0.17    0.23
   5 -16   1    0.34    0.27
  -5  16  -1    0.93    0.18
   5  16   1    0.18    0.25
   6 -16   1   -0.06    0.24
  -6  16  -1    0.20    0.12
   6  16   1   -0.10    0.34
   4 -17  -1    0.11    0.43
   4 -17  -1   -0.46    0.22
  -4  17   1   -0.25    0.20
   3 -17  -1   -0.36    0.20
   3 -17  -1   -0.19    0.23
  -3  17   1    0.17    0.16
   2 -17  -1    0.27    0.23
  -2  17   1   -0.28    0.17
  -1  17   1    0.60    0.23
   1  17  -1   -0.55    0.26
   0  17   1   -0.02    0.24
   0  17  -1    0.16    0.28
   1  17   1    0.29    0.25
  -1  17  -1    0.21    0.27
  -2  17  -1    0.23    0.16
   3 -17   1    0.02    0.25
   3 -17   1    0.42    0.22
  -3  17  -1    0.75    0.17
   4 -17   1    0.25    0.48
   4 -17   1   -0.08    0.23
  -4  17  -1    0.06    0.22
   1  18  -1    0.34    0.13
  -1  18   1    0.24    0.26
   0  18   1   -0.45    0.16
  -1  18  -1   -0.45    0.19
  13   0  -2    0.56    0.33
 -13   0   2   -0.29    0.16
  12   0  -2    0.17    0.26
 -12   0   2    0.25    0.25
 -11   0   2   -0.06    0.18
  11   0  -2    0.12    0.22
  10   0  -2   -0.02    0.16
 -10   0   2    0.27    0.17
  10   0  -2    0.10    0.16
 -10   0   2   -0.01    0.17
  -9   0   2   10.85    0.42
   9   0  -2   10.93    0.42
  -9   0   2   11.25    0.42
   9   0  -2   11.04    0.43
  -8   0   2   11.92    0.40
   8   0  -2   12.23    0.41
  -8   0   2   12.82    0.41
   8   0  -2   12.44    0.40
  -7   0   2   -0.08    0.08
   7   0  -2   -0.05    0.09
  -7   0   2   -0.11    0.08
   7   0  -2    0.00    0.08
   6   0  -2    0.69    0.10
  -6   0   2    0.69    0.10
  -6   0   2    0.63    0.09
   6   0  -2    0.80    0.10
  -5   0   2    3.48    0.15
   5   0  -2    3.39    0.15
   5   0  -2    3.50    0.15
  -5   0   2    3.51    0.15
   4   0  -2    1.41    0.09
  -4   0   2    1.40    0.09
  -4   0   2    1.44    0.09
   4   0  -2    1.48    0.09
  -3   0   2   73.91    1.66
   3   0  -2   73.83    1.66
   3   0  -2   72.57    1.66
  -3   0   2   74.03    1.66
   2   0  -2   37.38    0.83
  -2   0   2   34.76    0.84
  -2   0   2   36.69    0.83
   2   0  -2   37.22    0.83
   1   0  -2   28.96    0.65
   1   0  -2   28.61    0.65
  -1   0   2   29.33    0.65
  -1   0   2   28.83    0.65
   1   0   2  259.62    5.72
   1   0   2  252.15    5.71
  -1   0  -2  255.82    5.71
  -1   0  -2  252.62    5.71
   2   0   2   43.16    0.99
   2   0   2   45.15    0.99
  -2   0  -2   43.16    0.99
  -2   0  -2   43.40    0.99
  -3   0  -2   21.07    0.52
   3   0   2   21.22    0.52
  -3   0  -2   21.66    0.52
   3   0   2   22.19    0.52
   4   0   2    1.69    0.10
  -4   0  -2    1.53    0.09
  -4   0  -2    1.64    0.09
   4   0   2    1.61    0.09
  -5   0  -2    4.48    0.17
  -5   0  -2    4.31    0.17
   5   0   2    4.21    0.17
   5   0   2    4.36    0.18
   6   0   2   15.88    0.44
   6   0   2   16.49    0.46
  -6   0  -2   15.86    0.45
  -7   0  -2    0.15    0.09
  -7   0  -2    0.34    0.10
   7   0   2    0.35    0.09
   7   0   2    0.21    0.10
  -8   0  -2    0.34    0.13
  -8   0  -2    0.49    0.12
   8   0   2    0.32    0.13
   8   0   2    0.36    0.12
  -9   0  -2    1.59    0.20
   9   0   2    1.57    0.23
  -9   0  -2    1.25    0.19
   9   0   2    1.25    0.18
  10   0   2    0.04    0.17
 -10   0  -2   -0.06    0.17
 -10   0  -2    0.11    0.19
  10   0   2   -0.22    0.17
  11   0   2   -0.14    0.23
 -11   0  -2   -0.09    0.21
 -12   0  -2    0.09    0.25
  12   0   2    0.20    0.24
  13  -1  -2   -0.56    0.26
  13   1  -2    0.30    0.38
  12  -1  -2   -0.07    0.27
 -12  -1   2    0.07    0.22
  12   1  -2    0.07    0.24
 -12   1   2    0.04    0.24
  11  -1  -2    0.57    0.24
 -11  -1   2    0.40    0.19
  11   1  -2    0.82    0.22
 -11   1   2    0.31    0.19
  11   1  -2    0.79    0.37
  10  -1  -2    0.76    0.20
 -10  -1   2    0.74    0.27
  10  -1  -2    0.69    0.21
 -10   1   2    0.67    0.17
  10   1  -2    0.78    0.19
 -10   1   2    0.59    0.18
  10   1  -2    0.91    0.20
  -9  -1   2    2.51    0.23
  -9  -1   2    2.46    0.22
   9  -1  -2    2.38    0.28
   9  -1  -2    2.54    0.22
  -9   1   2    2.98    0.29
   9   1  -2    2.31    0.25
   9   1  -2    2.54    0.25
  -9   1   2    2.72    0.25
  -8  -1   2    1.21    0.16
   8  -1  -2    1.05    0.15
  -8  -1   2    0.85    0.13
   8  -1  -2    1.12    0.15
   8   1  -2    0.89    0.14
   8   1  -2    0.90    0.15
  -8   1   2    1.21    0.15
  -8   1   2    1.12    0.14
  -7  -1   2    1.29    0.16
  -7  -1   2    1.58    0.14
   7  -1  -2    1.64    0.16
   7  -1  -2    1.82    0.17
   7   1  -2    1.45    0.14
  -7   1   2    1.38    0.17
  -7   1   2    1.12    0.14
   7   1  -2    1.46    0.16
   6  -1  -2   -0.12    0.08
  -6  -1   2    0.02    0.06
  -6  -1   2    0.02    0.08
   6  -1  -2   -0.16    0.06
   6   1  -2   -0.02    0.07
  -6   1   2   -0.04    0.06
  -6   1   2   -0.07    0.07
   6   1  -2   -0.08    0.06
   5  -1  -2    0.93    0.10
   5  -1  -2    0.94    0.10
  -5  -1   2    0.78    0.09
  -5  -1   2    0.78    0.08
  -5   1   2    0.82    0.09
  -5   1   2    0.78    0.09
   5   1  -2    0.90    0.10
   5   1  -2    0.81    0.10
   4  -1  -2    4.31    0.16
  -4  -1   2    4.18    0.15
  -4  -1   2    4.25    0.15
   4  -1  -2    4.31    0.16
   4   1  -2    4.21    0.15
  -4   1   2    4.24    0.15
  -4   1   2    4.18    0.15
   4   1  -2    4.16    0.15
  -3  -1   2    2.07    0.09
  -3  -1   2    2.17    0.09
   3  -1  -2    2.11    0.09
   3  -1  -2    2.03    0.09
   3   1  -2    2.10    0.09
  -3   1   2    2.18    0.10
   3   1  -2    2.04    0.09
  -3   1   2    2.16    0.09
  -2  -1   2    0.02    0.02
   2  -1  -2    0.01    0.02
  -2  -1   2    0.01    0.03
   2  -1  -2   -0.05    0.04
  -2   1   2   -0.01    0.02
   2   1  -2    0.01    0.02
  -2   1   2    0.00    0.02
   2   1  -2    0.01    0.02
   1  -1  -2   10.61    0.25
  -1  -1   2   10.64    0.25
   1  -1  -2   10.64    0.25
  -1  -1   2   11.01    0.25
  -1  -1   2   10.24    0.25
  -1   1   2   10.54    0.25
   1   1  -2   10.33    0.25
   1   1  -2   10.64    0.25
  -1   1   2   10.60    0.25
   0  -1   2    7.50    0.18
   0  -1  -2    6.87    0.18
   0  -1   2    6.52    0.17
   0  -1   2    6.57    0.17
   0  -1   2    6.91    0.17
   0  -1  -2    7.10    0.18
   0   1   2    7.74    0.18
   0   1   2    7.14    0.17
   0   1   2    7.20    0.17
   0   1  -2    7.33    0.17
   0   1  -2    7.25    0.17
   0   1  -2    5.99    0.17
   0   1  -2    6.63    0.17
   1  -1   2   11.92    0.27
  -1  -1  -2   11.77    0.27
   1  -1   2   11.66    0.27
  -1  -1  -2   11.53    0.27
   1  -1   2   11.43    0.27
   1   1   2   11.37    0.27
   1   1   2   11.15    0.26
  -1   1  -2   10.98    0.27
  -1   1  -2   11.50    0.27
  -1   1  -2   11.57    0.27
   1   1   2   11.63    0.27
   2  -1   2   24.43    0.56
  -2  -1  -2   23.46    0.56
   2  -1   2   23.54    0.56
  -2   1  -2   23.65    0.56
   2   1   2   24.07    0.56
   2   1   2   23.99    0.56
  -2   1  -2   24.01    0.56
  -3  -1  -2   20.76    0.53
   3  -1   2   21.40    0.51
  -3  -1  -2   20.99    0.51
   3  -1   2   21.14    0.51
  -3   1  -2   20.97    0.51
  -3   1  -2   20.22    0.51
   3   1   2   21.60    0.51
   3   1   2   21.25    0.51
   4  -1   2    1.31    0.09
  -4  -1  -2    1.40    0.09
  -4  -1  -2    1.30    0.09
   4  -1   2    1.42    0.09
   4   1   2    1.42    0.09
  -4   1  -2    1.39    0.09
   4   1   2    1.45    0.09
  -4   1  -2    1.34    0.09
   5  -1   2    4.55    0.18
  -5  -1  -2    4.61    0.18
   5  -1   2    4.53    0.17
  -5  -1  -2    4.64    0.17
   5   1   2    4.27    0.17
   5   1   2    4.56    0.18
  -5   1  -2    4.51    0.18
  -5   1  -2    4.41    0.17
   6  -1   2    0.07    0.08
  -6  -1  -2    0.06    0.07
  -6  -1  -2    0.14    0.07
   6   1   2    0.04    0.06
  -6   1  -2    0.11    0.07
   6   1   2    0.05    0.07
  -6   1  -2    0.09    0.07
   7  -1   2    0.50    0.12
  -7  -1  -2    0.28    0.09
  -7  -1  -2    0.31    0.10
   7  -1   2    0.31    0.10
   7   1   2    0.27    0.09
  -7   1  -2    0.45    0.10
  -7   1  -2    0.13    0.08
   7   1   2    0.25    0.10
  -8  -1  -2    0.72    0.13
  -8  -1  -2    0.85    0.13
   8  -1   2    1.02    0.15
   8  -1   2    0.93    0.15
  -8   1  -2    0.96    0.16
   8   1   2    0.80    0.14
  -8   1  -2    1.02    0.14
   8   1   2    0.66    0.13
  -9  -1  -2    0.41    0.15
   9  -1   2    0.46    0.18
   9  -1   2    0.65    0.17
  -9  -1  -2    0.65    0.20
   9   1   2    0.44    0.15
  -9   1  -2    0.50    0.18
  -9   1  -2    0.64    0.16
  10  -1   2    0.02    0.16
  10  -1   2   -0.05    0.20
 -10  -1  -2    0.09    0.18
 -10  -1  -2   -0.18    0.15
 -10   1  -2    0.05    0.15
 -10   1  -2    0.14    0.17
  10   1   2   -0.27    0.18
  10   1   2   -0.05    0.19
 -11  -1  -2    0.22    0.23
  11  -1   2    0.35    0.27
 -11   1  -2    0.12    0.25
  11   1   2   -0.01    0.29
  11   1   2    0.05    0.23
 -12  -1  -2    0.46    0.25
  12  -1   2   -0.06    0.39
 -12   1  -2    0.07    0.26
  12   1   2   -0.40    0.15
  12  -2  -2    0.08    0.30
  12   2  -2   -0.28    0.14
 -12   2   2   -0.49    0.20
 -11  -2   2   -0.15    0.20
  11  -2  -2    0.05    0.25
 -11   2   2    0.24    0.19
  11   2  -2   -0.35    0.19
  11   2  -2    0.53    0.20
  10  -2  -2    0.25    0.19
 -10  -2   2    0.32    0.18
 -10  -2   2    0.08    0.16
  10  -2  -2    0.07    0.20
  10   2  -2   -0.18    0.19
 -10   2   2    0.13    0.17
 -10   2   2    0.28    0.17
  10   2  -2    0.39    0.19
   9  -2  -2    0.28    0.14
   9  -2  -2    0.06    0.19
  -9  -2   2    0.20    0.15
  -9  -2   2    0.34    0.13
  -9   2   2    0.30    0.16
  -9   2   2    0.21    0.15
   9   2  -2    0.31    0.15
   8  -2  -2    2.18    0.20
   8  -2  -2    2.02    0.19
  -8  -2   2    2.06    0.20
  -8  -2   2    1.78    0.18
   8   2  -2    1.66    0.18
   8   2  -2    1.76    0.20
  -8   2   2    2.38    0.20
  -8   2   2    2.24    0.19
   7  -2  -2    0.39    0.10
  -7  -2   2    0.35    0.09
   7  -2  -2    0.34    0.12
  -7  -2   2    0.21    0.09
  -7   2   2    0.30    0.10
   7   2  -2    0.37    0.10
   7   2  -2    0.28    0.10
  -7   2   2    0.33    0.09
  -6  -2   2    0.02    0.06
  -6  -2   2   -0.02    0.06
   6  -2  -2    0.15    0.09
   6  -2  -2   -0.09    0.06
  -6   2   2    0.12    0.07
   6   2  -2    0.05    0.07
   6   2  -2    0.07    0.08
  -6   2   2   -0.03    0.07
  -5  -2   2    4.83    0.18
   5  -2  -2    4.82    0.19
   5  -2  -2    4.89    0.19
  -5  -2   2    4.74    0.18
  -5   2   2    4.92    0.19
   5   2  -2    4.80    0.18
  -5   2   2    5.04    0.18
   5   2  -2    4.92    0.18
  -4  -2   2   21.40    0.53
   4  -2  -2   21.14    0.53
   4  -2  -2   21.48    0.53
  -4  -2   2   21.60    0.53
   4   2  -2   21.20    0.53
  -4   2   2   21.23    0.53
   4   2  -2   21.53    0.53
  -4   2   2   21.35    0.53
  -3  -2   2    0.48    0.05
  -3  -2   2    0.46    0.05
   3  -2  -2    0.53    0.06
   3  -2  -2    0.50    0.06
   3   2  -2    0.47    0.05
  -3   2   2    0.45    0.05
   3   2  -2    0.49    0.05
  -3   2   2    0.51    0.05
   2  -2  -2   83.61    1.92
  -2  -2   2   90.75    1.94
  -2  -2   2   89.67    1.98
  -2  -2   2   80.24    1.91
  -2   2   2   83.29    1.92
   2   2  -2   91.90    1.95
   2   2  -2   82.94    1.91
  -2   2   2   83.61    1.92
  -1  -2   2   68.99    1.63
   1  -2  -2   74.01    1.65
  -1  -2   2   70.02    1.62
   1  -2  -2   72.67    1.67
  -1  -2   2   73.83    1.64
   1  -2  -2   75.00    1.65
  -1  -2   2   70.11    1.62
   1   2  -2   71.93    1.65
   1   2  -2   71.99    1.63
   1   2  -2   68.82    1.61
   1   2  -2   74.06    1.67
  -1   2   2   74.50    1.66
   0  -2   2   14.84    0.39
   0  -2  -2   15.38    0.36
   0  -2   2   16.15    0.37
   0  -2  -2   16.24    0.37
   0  -2   2   15.57    0.36
   0   2  -2   16.17    0.38
   0   2  -2   14.24    0.38
   0   2  -2   15.80    0.36
   0   2   2   15.79    0.36
   0   2  -2   15.70    0.36
   0   2   2   15.97    0.37
   0   2   2   16.34    0.37
   0   2   2   15.90    0.37
   0   2  -2   16.58    0.37
   0   2  -2   16.09    0.37
   0   2   2   15.80    0.36
  -1  -2  -2  149.04    3.41
  -1  -2  -2  151.62    3.39
   1  -2   2  138.03    3.43
   1  -2   2  156.52    3.44
  -1  -2  -2  155.64    3.42
   1  -2   2  154.18    3.42
  -1  -2  -2  154.84    3.42
  -1   2  -2  155.35    3.43
  -1   2  -2  139.82    3.45
  -1   2  -2  158.63    3.45
   1   2   2  157.22    3.43
   1   2   2  152.95    3.42
   1   2   2  146.67    3.38
   2  -2   2   40.83    0.92
  -2  -2  -2   40.10    0.92
  -2  -2  -2   40.16    0.92
   2  -2   2   39.85    0.91
  -2   2  -2   40.07    0.92
   2   2   2   39.77    0.92
   2   2   2   40.54    0.92
  -2   2  -2   41.35    0.92
  -3  -2  -2   11.12    0.29
   3  -2   2   11.73    0.30
  -3  -2  -2   11.38    0.30
   3  -2   2   11.26    0.30
  -3   2  -2   11.26    0.30
  -3   2  -2   11.17    0.30
   3   2   2   11.55    0.29
   3   2   2   11.39    0.30
  -4  -2  -2   -0.01    0.05
   4  -2   2   -0.05    0.04
  -4  -2  -2   -0.01    0.04
   4  -2   2   -0.01    0.05
  -4   2  -2    0.02    0.04
   4   2   2   -0.01    0.04
  -4   2  -2   -0.02    0.04
   4   2   2    0.02    0.05
  -5  -2  -2    2.40    0.14
  -5  -2  -2    2.23    0.12
   5  -2   2    2.31    0.13
   5  -2   2    2.41    0.13
  -5   2  -2    2.21    0.13
  -5   2  -2    2.37    0.13
   5   2   2    2.21    0.13
   5   2   2    2.42    0.13
  -6  -2  -2    0.18    0.07
   6  -2   2    0.16    0.08
  -6  -2  -2    0.21    0.08
   6  -2   2    0.26    0.08
   6   2   2    0.21    0.07
  -6   2  -2    0.24    0.08
   6   2   2    0.17    0.09
  -6   2  -2    0.21    0.08
  -7  -2  -2   -0.01    0.09
   7  -2   2   -0.08    0.09
  -7  -2  -2    0.00    0.08
   7  -2   2    0.07    0.09
   7   2   2    0.03    0.09
  -7   2  -2    0.07    0.09
  -7   2  -2    0.11    0.09
   8  -2   2    1.67    0.18
  -8  -2  -2    1.74    0.19
  -8  -2  -2    1.83    0.18
   8  -2   2    1.70    0.18
  -8   2  -2    1.43    0.19
   8   2   2    1.31    0.18
   8   2   2    1.31    0.16
  -8   2  -2    1.39    0.17
  -9  -2  -2    0.03    0.13
   9  -2   2    0.05    0.19
  -9  -2  -2    0.21    0.14
   9  -2   2   -0.05    0.15
  -9   2  -2    0.20    0.15
   9   2   2    0.16    0.16
   9   2   2   -0.16    0.13
 -10  -2  -2    0.98    0.31
  10  -2   2    0.18    0.20
 -10   2  -2    0.64    0.20
  10   2   2    0.43    0.18
 -10   2  -2    0.53    0.17
  10   2   2    0.09    0.18
  11  -2   2    0.02    0.29
 -11  -2  -2    0.15    0.20
 -11   2  -2    0.03    0.20
  11   2   2   -0.02    0.22
 -12  -2  -2    0.21    0.24
  12  -2   2   -0.33    0.30
 -12   2  -2   -0.27    0.19
  12   2   2    0.15    0.18
 -12  -3   2    0.27    0.31
  12  -3  -2    0.53    0.30
  12   3  -2   -0.01    0.16
  11  -3  -2    0.09    0.26
 -11  -3   2    0.05    0.19
 -11   3   2    0.20    0.20
  11   3  -2    0.08    0.18
  11   3  -2    0.41    0.22
 -10  -3   2    0.59    0.21
  10  -3  -2    0.63    0.18
  10  -3  -2    0.63    0.21
  10   3  -2    0.59    0.21
 -10   3   2    0.50    0.16
  10   3  -2    0.52    0.20
 -10   3   2    0.57    0.19
  -9  -3   2    0.32    0.15
   9  -3  -2    0.11    0.20
  -9  -3   2    0.07    0.13
   9  -3  -2   -0.11    0.15
   9   3  -2    0.07    0.16
   9   3  -2    0.01    0.14
  -9   3   2    0.25    0.15
  -9   3   2    0.10    0.14
   8  -3  -2    1.80    0.18
   8  -3  -2    1.94    0.19
  -8  -3   2    1.90    0.18
  -8  -3   2    2.09    0.19
   8   3  -2    2.39    0.19
   8   3  -2    2.25    0.26
  -8   3   2    1.87    0.20
  -8   3   2    1.98    0.19
  -7  -3   2    0.70    0.11
   7  -3  -2    0.43    0.10
   7  -3  -2    0.55    0.11
  -7  -3   2    0.66    0.11
   7   3  -2    0.46    0.11
  -7   3   2    0.54    0.11
   7   3  -2    0.64    0.11
  -7   3   2    0.61    0.10
   6  -3  -2    1.40    0.12
  -6  -3   2    1.33    0.12
   6  -3  -2    1.36    0.14
  -6  -3   2    1.18    0.13
  -6   3   2    1.33    0.13
  -6   3   2    1.31    0.12
   6   3  -2    1.24    0.12
   6   3  -2    1.25    0.13
  -5  -3   2    3.49    0.16
  -5  -3   2    3.70    0.16
   5  -3  -2    3.45    0.15
   5  -3  -2    3.85    0.16
   5   3  -2    3.51    0.16
  -5   3   2    3.45    0.16
   5   3  -2    3.38    0.15
  -5   3   2    3.58    0.16
  -4  -3   2    0.29    0.06
   4  -3  -2    0.25    0.06
   4  -3  -2    0.39    0.06
  -4  -3   2    0.28    0.06
  -4   3   2    0.35    0.06
   4   3  -2    0.20    0.05
   4   3  -2    0.37    0.05
  -4   3   2    0.27    0.05
  -3  -3   2    3.73    0.13
   3  -3  -2    3.94    0.13
  -3  -3   2    3.98    0.12
   3  -3  -2    3.72    0.13
   3   3  -2    3.73    0.13
  -3   3   2    3.78    0.13
  -3   3   2    3.88    0.13
   3   3  -2    3.93    0.13
   2  -3  -2    5.73    0.16
  -2  -3   2    5.84    0.16
  -2  -3   2    5.63    0.16
  -2  -3   2    5.72    0.15
   2  -3  -2    5.64    0.16
  -2  -3   2    5.70    0.16
  -2   3   2    5.73    0.16
   2   3  -2    5.67    0.16
  -2   3   2    5.69    0.16
   2   3  -2    5.61    0.15
   2   3  -2    5.81    0.16
   1  -3  -2    0.27    0.03
   1  -3  -2    0.27    0.04
  -1  -3   2    0.32    0.04
  -1  -3   2    0.27    0.03
  -1  -3   2    0.29    0.04
   1  -3  -2    0.29    0.04
   1  -3  -2    0.32    0.03
  -1  -3   2    0.26    0.03
   1   3  -2    0.33    0.03
  -1   3   2    0.30    0.03
  -1   3   2    0.29    0.03
  -1   3   2    0.30    0.04
   1   3  -2    0.32    0.03
   1   3  -2    0.28    0.04
   1   3  -2    0.26    0.03
   0  -3  -2   10.06    0.23
   0  -3  -2   10.04    0.26
   0  -3   2    9.92    0.25
   0  -3   2   10.07    0.27
   0  -3  -2   10.13    0.25
   0  -3   2   10.05    0.23
   0   3  -2   10.04    0.25
   0   3  -2   10.10    0.23
   0   3  -2   10.41    0.26
   0   3  -2    9.91    0.25
   0   3  -2    9.41    0.23
   0   3  -2   10.52    0.25
   0   3   2    9.82    0.23
   0   3   2   10.14    0.26
   0   3   2   10.13    0.26
   0   3   2   10.12    0.23
   0   3   2   10.49    0.25
  -1  -3  -2  109.58    2.51
  -1  -3  -2  114.64    2.55
   1  -3   2  111.61    2.54
   1  -3   2  109.50    2.51
  -1  -3  -2  107.30    2.51
   1  -3   2  111.29    2.52
   1  -3   2  113.43    2.62
  -1  -3  -2  108.55    2.53
   1   3   2  110.53    2.52
  -1   3  -2  115.36    2.52
   1   3   2  110.10    2.51
  -1   3  -2  114.50    2.54
   1   3   2  110.86    2.52
  -1   3  -2  114.05    2.53
   1   3   2  110.54    2.52
  -2  -3  -2    3.26    0.10
  -2  -3  -2    3.43    0.10
   2  -3   2    3.35    0.11
  -2  -3  -2    3.47    0.11
   2  -3   2    3.18    0.12
   2  -3   2    3.34    0.11
   2   3   2    3.40    0.10
   2   3   2    3.45    0.11
   2   3   2    3.43    0.10
  -2   3  -2    3.36    0.11
  -2   3  -2    3.27    0.11
  -3  -3  -2    1.17    0.07
   3  -3   2    1.20    0.08
  -3  -3  -2    1.07    0.07
   3  -3   2    1.17    0.07
   3  -3   2    1.06    0.07
   3   3   2    1.13    0.07
   3   3   2    1.08    0.07
  -3   3  -2    1.20    0.07
  -3   3  -2    1.13    0.07
   4  -3   2    0.52    0.07
   4  -3   2    0.63    0.08
  -4  -3  -2    0.61    0.08
  -4  -3  -2    0.62    0.07
   4   3   2    0.65    0.07
   4   3   2    0.66    0.07
  -4   3  -2    0.70    0.07
  -4   3  -2    0.75    0.08
  -5  -3  -2    4.12    0.17
   5  -3   2    4.55    0.18
   5  -3   2    4.40    0.19
  -5  -3  -2    4.49    0.18
   5   3   2    4.21    0.17
   5   3   2    4.19    0.17
  -5   3  -2    4.26    0.17
  -5   3  -2    4.05    0.17
   6  -3   2    1.58    0.13
  -6  -3  -2    1.74    0.15
   6  -3   2    1.54    0.15
  -6  -3  -2    1.84    0.14
   6   3   2    1.73    0.13
  -6   3  -2    1.71    0.14
   6   3   2    1.45    0.13
  -6   3  -2    1.51    0.12
   7  -3   2    0.84    0.12
  -7  -3  -2    0.84    0.11
  -7  -3  -2    0.97    0.12
   7  -3   2    1.05    0.14
  -7   3  -2    0.93    0.12
   7   3   2    0.98    0.13
  -7   3  -2    0.98    0.13
   7   3   2    0.88    0.13
   8  -3   2   -0.11    0.11
   8  -3   2    0.00    0.11
  -8  -3  -2    0.08    0.10
  -8  -3  -2    0.17    0.12
  -8   3  -2    0.13    0.14
  -8   3  -2    0.07    0.14
   8   3   2   -0.05    0.15
  -9  -3  -2    1.24    0.17
  -9  -3  -2    1.38    0.17
   9  -3   2    1.49    0.25
   9  -3   2    1.09    0.19
   9   3   2    1.51    0.22
  -9   3  -2    1.35    0.18
  -9   3  -2    1.49    0.20
   9   3   2    1.26    0.17
 -10  -3  -2    0.12    0.20
  10  -3   2   -0.21    0.23
  10  -3   2    0.25    0.22
 -10   3  -2    0.06    0.16
  10   3   2    0.01    0.18
 -10   3  -2   -0.31    0.16
  10   3   2   -0.16    0.16
  11  -3   2    0.18    0.26
 -11  -3  -2    0.55    0.23
  11   3   2    0.59    0.26
 -11   3  -2    0.36    0.19
  11   3   2    0.08    0.26
  12  -3   2    0.34    0.34
 -12  -3  -2    0.40    0.25
 -12   3  -2   -0.09    0.17
  12  -4  -2   -0.16    0.32
 -12  -4   2   -0.23    0.26
 -12   4   2   -0.16    0.17
  12   4  -2    0.00    0.15
 -11  -4   2    0.46    0.25
  11  -4  -2    0.72    0.26
  11   4  -2    0.32    0.21
 -11   4   2   -0.04    0.17
  11   4  -2    0.37    0.22
 -10  -4   2    0.31    0.22
  10  -4  -2    0.14    0.22
 -10   4   2    0.06    0.17
 -10   4   2   -0.10    0.15
  10   4  -2    0.02    0.18
  10   4  -2    0.29    0.17
   9  -4  -2    0.27    0.20
  -9  -4   2    0.07    0.15
   9  -4  -2    0.21    0.16
  -9  -4   2    0.39    0.13
   9   4  -2    0.36    0.17
   9   4  -2    0.31    0.14
  -9   4   2    0.16    0.14
  -9   4   2    0.30    0.14
   8  -4  -2    0.61    0.13
  -8  -4   2    0.58    0.13
  -8  -4   2    0.84    0.14
   8  -4  -2    0.53    0.14
  -8   4   2    0.77    0.16
   8   4  -2    0.58    0.18
  -8   4   2    0.55    0.14
   8   4  -2    0.91    0.14
   7  -4  -2    0.57    0.12
  -7  -4   2    0.36    0.10
   7  -4  -2    0.56    0.11
  -7  -4   2    0.33    0.09
  -7   4   2    0.41    0.12
   7   4  -2    0.46    0.10
  -7   4   2    0.34    0.10
   7   4  -2    0.52    0.11
  -6  -4   2    0.14    0.08
   6  -4  -2    0.20    0.08
  -6  -4   2    0.30    0.08
   6  -4  -2    0.10    0.08
   6   4  -2    0.22    0.08
  -6   4   2    0.24    0.08
  -6   4   2    0.20    0.08
   6   4  -2    0.14    0.08
  -5  -4   2    3.06    0.15
   5  -4  -2    2.96    0.15
   5  -4  -2    3.14    0.16
  -5  -4   2    3.18    0.13
  -5  -4   2    3.17    0.15
  -5   4   2    3.00    0.14
  -5   4   2    3.13    0.16
   5   4  -2    3.20    0.14
   5   4  -2    3.22    0.15
  -4  -4   2    3.22    0.13
   4  -4  -2    3.22    0.14
   4  -4  -2    3.56    0.14
  -4  -4   2    3.42    0.13
  -4  -4   2    3.46    0.13
  -4   4   2    3.57    0.14
  -4   4   2    3.35    0.14
   4   4  -2    3.49    0.14
   4   4  -2    3.35    0.13
  -3  -4   2    0.28    0.05
   3  -4  -2    0.34    0.06
  -3  -4   2    0.27    0.04
   3  -4  -2    0.20    0.05
  -3  -4   2    0.33    0.05
  -3  -4   2    0.29    0.04
   3   4  -2    0.27    0.04
   3   4  -2    0.29    0.04
  -3   4   2    0.26    0.04
  -3   4   2    0.31    0.05
  -2  -4   2    0.98    0.06
   2  -4  -2    0.89    0.06
  -2  -4   2    0.93    0.05
   2  -4  -2    0.76    0.06
  -2  -4   2    0.94    0.07
   2  -4  -2    0.90    0.06
   2  -4  -2    0.89    0.07
  -2  -4   2    0.87    0.05
   2   4  -2    0.90    0.06
   2   4  -2    0.91    0.05
  -2   4   2    0.82    0.06
   2   4  -2    0.86    0.07
   2   4  -2    0.90    0.05
  -2   4   2    0.99    0.06
  -1  -4   2   47.81    1.09
   1  -4  -2   50.05    1.09
  -1  -4   2   48.30    1.13
   1  -4  -2   48.54    1.12
  -1  -4   2   49.15    1.11
   1  -4  -2   48.53    1.11
   1   4  -2   48.50    1.09
   1   4  -2   48.75    1.11
   1   4  -2   50.31    1.11
   1   4  -2   48.69    1.13
  -1   4   2   48.99    1.12
   1   4  -2   49.09    1.11
  -1   4   2   49.00    1.09
   1   4  -2   47.24    1.08
  -1   4   2   48.07    1.09
   0  -4   2    0.08    0.03
   0  -4   2    0.06    0.03
   0  -4  -2    0.10    0.04
   0  -4   2    0.11    0.01
   0  -4  -2    0.10    0.03
   0  -4   2    0.09    0.01
   0  -4  -2    0.08    0.02
   0  -4  -2    0.07    0.03
   0   4   2    0.10    0.02
   0   4   2    0.08    0.01
   0   4  -2    0.09    0.03
   0   4  -2    0.07    0.03
   0   4   2    0.11    0.04
   0   4  -2    0.06    0.03
   0   4   2    0.10    0.03
   0   4  -2    0.09    0.01
   0   4   2    0.09    0.02
   0   4   2    0.07    0.03
   1  -4   2   27.30    0.63
  -1  -4  -2   28.23    0.65
  -1  -4  -2   26.78    0.62
   1  -4   2   27.59    0.67
  -1  -4  -2   27.24    0.64
   1  -4   2   27.51    0.65
   1   4   2   27.16    0.62
  -1   4  -2   28.03    0.63
   1   4   2   27.30    0.63
   1   4   2   27.53    0.65
   1   4   2   27.72    0.62
  -1   4  -2   28.27    0.65
  -1   4  -2   27.82    0.63
   1   4   2   27.92    0.64
   2  -4   2    0.28    0.04
   2  -4   2    0.31    0.04
  -2  -4  -2    0.32    0.04
  -2  -4  -2    0.40    0.04
   2  -4   2    0.33    0.05
  -2  -4  -2    0.31    0.03
  -2  -4  -2    0.37    0.05
  -2   4  -2    0.29    0.04
   2   4   2    0.31    0.04
  -2   4  -2    0.37    0.05
   2   4   2    0.34    0.04
   2   4   2    0.35    0.04
   2   4   2    0.41    0.04
  -2   4  -2    0.33    0.04
   3  -4   2   15.15    0.39
  -3  -4  -2   15.47    0.38
   3  -4   2   15.53    0.39
   3  -4   2   14.96    0.39
  -3  -4  -2   15.31    0.37
  -3   4  -2   14.89    0.39
   3   4   2   15.34    0.38
   3   4   2   15.82    0.38
  -3   4  -2   15.65    0.39
   4  -4   2    0.27    0.06
   4  -4   2    0.18    0.05
  -4  -4  -2    0.22    0.05
  -4  -4  -2    0.21    0.04
   4  -4   2    0.24    0.07
  -4  -4  -2    0.24    0.05
  -4   4  -2    0.20    0.05
   4   4   2    0.17    0.05
   4   4   2    0.18    0.05
  -4   4  -2    0.21    0.05
  -5  -4  -2    0.47    0.09
  -5  -4  -2    0.44    0.08
   5  -4   2    0.61    0.09
  -5   4  -2    0.45    0.08
   5   4   2    0.46    0.07
  -5   4  -2    0.45    0.07
   5   4   2    0.44    0.08
  -6  -4  -2   -0.01    0.07
  -6  -4  -2    0.04    0.07
   6  -4   2   -0.03    0.09
   6  -4   2    0.13    0.07
   6   4   2   -0.07    0.07
   6   4   2    0.00    0.06
  -6   4  -2    0.09    0.07
  -6   4  -2   -0.02    0.06
   7  -4   2    0.08    0.10
   7  -4   2    0.00    0.08
  -7  -4  -2    0.04    0.09
  -7  -4  -2    0.05    0.09
   7   4   2    0.05    0.08
  -7   4  -2    0.12    0.11
   7   4   2   -0.01    0.09
  -7   4  -2    0.02    0.09
  -8  -4  -2    0.06    0.11
  -8  -4  -2   -0.16    0.11
   8  -4   2   -0.01    0.12
   8  -4   2   -0.01    0.12
  -8   4  -2    0.11    0.12
   8   4   2    0.04    0.13
  -8   4  -2    0.04    0.13
   8   4   2   -0.19    0.11
  -9  -4  -2    0.65    0.17
  -9  -4  -2    0.91    0.15
   9  -4   2    0.45    0.17
   9  -4   2    0.57    0.22
   9   4   2    0.81    0.18
  -9   4  -2    0.88    0.17
  -9   4  -2    0.50    0.15
   9   4   2    0.49    0.16
  10  -4   2   -0.14    0.21
 -10  -4  -2    0.23    0.24
 -10   4  -2   -0.05    0.18
  10   4   2   -0.04    0.18
  10   4   2   -0.29    0.18
 -10   4  -2   -0.09    0.16
 -11  -4  -2    0.21    0.20
  11  -4   2    0.11    0.25
  11   4   2   -0.04    0.21
 -11   4  -2   -0.04    0.20
  11   4   2    0.17    0.21
  12  -4   2    0.07    0.29
 -12  -4  -2    0.84    0.32
 -12  -5   2    0.47    0.30
 -12  -5   2    0.04    0.21
  12  -5  -2    0.06    0.32
  12   5  -2    0.44    0.39
 -11  -5   2    0.01    0.25
 -11  -5   2   -0.16    0.19
  11  -5  -2   -0.06    0.27
 -11   5   2    0.08    0.19
  11   5  -2   -0.37    0.23
 -11   5   2    0.54    0.29
  11   5  -2    0.00    0.19
 -10  -5   2    0.01    0.14
 -10  -5   2    0.14    0.18
 -10   5   2    0.56    0.18
  10   5  -2    0.42    0.17
 -10   5   2    0.37    0.22
  10   5  -2    0.20    0.22
  -9  -5   2    0.01    0.15
  -9  -5   2   -0.13    0.13
  -9  -5   2    0.07    0.12
   9  -5  -2   -0.24    0.16
   9  -5  -2    0.07    0.15
   9   5  -2   -0.19    0.12
  -9   5   2   -0.09    0.15
   9   5  -2    0.01    0.15
  -9   5   2   -0.11    0.13
   8  -5  -2    0.47    0.13
  -8  -5   2    0.55    0.13
   8  -5  -2    0.53    0.16
  -8  -5   2    0.39    0.13
  -8  -5   2    0.40    0.12
   8   5  -2    0.49    0.15
  -8   5   2    0.44    0.14
  -8   5   2    0.19    0.13
   8   5  -2    0.43    0.13
   7  -5  -2    0.00    0.10
  -7  -5   2    0.08    0.08
   7  -5  -2    0.08    0.11
  -7  -5   2    0.23    0.10
  -7  -5   2    0.23    0.10
   7   5  -2    0.20    0.10
   7   5  -2    0.23    0.09
  -7   5   2    0.24    0.12
  -7   5   2    0.15    0.09
  -6  -5   2    0.91    0.11
   6  -5  -2    0.84    0.11
  -6  -5   2    0.99    0.12
   6  -5  -2    1.03    0.12
  -6  -5   2    1.10    0.11
   6   5  -2    1.10    0.11
   6   5  -2    1.21    0.13
  -6   5   2    0.86    0.10
  -6   5   2    0.83    0.11
  -5  -5   2    0.15    0.06
   5  -5  -2    0.20    0.08
  -5  -5   2    0.18    0.06
   5  -5  -2    0.08    0.07
  -5   5   2    0.13    0.06
   5   5  -2    0.17    0.07
   5   5  -2    0.15    0.06
  -5   5   2    0.14    0.06
   4  -5  -2    0.59    0.08
  -4  -5   2    0.62    0.08
   4  -5  -2    0.60    0.07
  -4  -5   2    0.72    0.08
  -4  -5   2    0.74    0.08
  -4  -5   2    0.63    0.07
  -4   5   2    0.69    0.08
   4   5  -2    0.69    0.07
   4   5  -2    0.74    0.08
  -4   5   2    0.69    0.07
   3  -5  -2    1.48    0.09
   3  -5  -2    1.56    0.09
   3  -5  -2    1.47    0.09
  -3  -5   2    1.52    0.09
  -3  -5   2    1.42    0.08
  -3  -5   2    1.57    0.08
   3  -5  -2    1.57    0.10
  -3  -5   2    1.62    0.10
   3   5  -2    1.34    0.08
  -3   5   2    1.54    0.08
  -3   5   2    1.45    0.09
   3   5  -2    1.44    0.08
  -2  -5   2   32.84    0.75
  -2  -5   2   33.83    0.78
   2  -5  -2   32.70    0.78
   2  -5  -2   33.42    0.76
  -2  -5   2   33.31    0.77
   2  -5  -2   33.31    0.76
   2  -5  -2   32.99    0.79
  -2   5   2   32.99    0.76
   2   5  -2   33.02    0.77
   2   5  -2   32.79    0.77
   2   5  -2   32.46    0.75
   2   5  -2   32.25    0.75
   2   5  -2   33.34    0.81
  -2   5   2   32.46    0.76
   1  -5  -2   29.08    0.68
   1  -5  -2   28.82    0.65
   1  -5  -2   27.35    0.65
  -1  -5   2   28.29    0.67
  -1  -5   2   29.30    0.70
   1  -5  -2   28.65    0.69
  -1  -5   2   28.38    0.64
  -1  -5   2   28.07    0.64
   1   5  -2   28.31    0.70
   1   5  -2   29.21    0.68
  -1   5   2   28.61    0.68
   1   5  -2   28.13    0.67
  -1   5   2   27.70    0.65
  -1   5   2   29.19    0.68
   1   5  -2   28.06    0.67
  -1   5   2   29.04    0.68
   1   5  -2   28.34    0.64
  -1   5   2   28.60    0.65
   1   5  -2   27.40    0.63
   0  -5  -2    6.04    0.15
   0  -5  -2    6.27    0.19
   0  -5   2    6.13    0.20
   0  -5   2    5.93    0.18
   0  -5   2    6.07    0.14
   0  -5  -2    6.16    0.15
   0  -5  -2    5.85    0.19
   0  -5   2    6.40    0.15
   0   5   2    6.07    0.19
   0   5   2    6.09    0.19
   0   5  -2    5.94    0.18
   0   5  -2    5.98    0.14
   0   5  -2    6.30    0.19
   0   5  -2    6.27    0.14
   0   5   2    6.31    0.19
   0   5  -2    6.30    0.20
   0   5   2    6.21    0.15
  -1  -5  -2    6.86    0.19
   1  -5   2    6.62    0.20
   1  -5   2    6.96    0.17
   1  -5   2    6.73    0.22
  -1  -5  -2    6.72    0.16
  -1  -5  -2    6.38    0.17
  -1  -5  -2    7.23    0.21
  -1   5  -2    6.90    0.17
   1   5   2    6.87    0.17
  -1   5  -2    6.75    0.20
  -1   5  -2    6.99    0.17
   1   5   2    6.53    0.21
   1   5   2    6.84    0.17
   1   5   2    6.71    0.18
   1   5   2    6.54    0.20
  -1   5  -2    6.96    0.21
   1   5   2    6.95    0.20
  -2  -5  -2    0.47    0.06
  -2  -5  -2    0.43    0.05
   2  -5   2    0.46    0.05
   2  -5   2    0.45    0.07
  -2  -5  -2    0.50    0.07
   2  -5   2    0.45    0.06
  -2  -5  -2    0.38    0.05
   2  -5   2    0.44    0.06
   2   5   2    0.46    0.05
   2   5   2    0.48    0.04
  -2   5  -2    0.49    0.05
   2   5   2    0.51    0.06
   2   5   2    0.51    0.05
  -2   5  -2    0.43    0.05
  -2   5  -2    0.56    0.06
  -3  -5  -2    6.44    0.18
   3  -5   2    6.57    0.20
  -3  -5  -2    6.37    0.19
   3  -5   2    6.51    0.21
   3  -5   2    6.52    0.19
  -3  -5  -2    6.54    0.19
  -3  -5  -2    6.29    0.20
  -3   5  -2    6.58    0.19
   3   5   2    6.49    0.19
  -3   5  -2    6.41    0.19
   3   5   2    6.27    0.18
   3   5   2    6.33    0.19
   4  -5   2    0.11    0.06
   4  -5   2    0.19    0.06
   4  -5   2    0.15    0.05
  -4  -5  -2    0.07    0.05
  -4  -5  -2    0.13    0.05
  -4  -5  -2    0.17    0.05
   4   5   2    0.08    0.05
  -4   5  -2    0.09    0.05
  -4   5  -2    0.17    0.06
   4   5   2    0.11    0.05
   5  -5   2    0.21    0.08
  -5  -5  -2    0.28    0.07
   5  -5   2    0.23    0.07
  -5  -5  -2    0.21    0.07
  -5  -5  -2    0.30    0.06
   5  -5   2    0.28    0.07
   5   5   2    0.27    0.07
   5   5   2    0.21    0.07
  -5   5  -2    0.28    0.07
  -5   5  -2    0.15    0.07
   6  -5   2    0.75    0.10
  -6  -5  -2    0.86    0.10
  -6  -5  -2    0.77    0.10
   6  -5   2    0.85    0.10
  -6  -5  -2    0.74    0.09
   6  -5   2    0.84    0.12
  -6   5  -2    0.69    0.09
  -6   5  -2    0.94    0.12
   6   5   2    0.60    0.09
   6   5   2    0.72    0.11
  -7  -5  -2    0.04    0.09
   7  -5   2   -0.07    0.09
  -7  -5  -2   -0.05    0.08
  -7  -5  -2   -0.07    0.07
   7  -5   2    0.09    0.11
  -7   5  -2    0.02    0.08
   7   5   2   -0.03    0.08
   7   5   2    0.10    0.11
   8  -5   2    2.89    0.21
  -8  -5  -2    2.55    0.22
  -8  -5  -2    2.97    0.16
   8  -5   2    3.12    0.26
  -8  -5  -2    2.63    0.22
  -8   5  -2    2.47    0.21
   8   5   2    3.00    0.25
   8   5   2    2.74    0.25
  -8   5  -2    2.96    0.22
   9  -5   2    0.54    0.19
  -9  -5  -2    0.81    0.21
   9  -5   2    0.75    0.20
  -9  -5  -2    0.57    0.14
  -9   5  -2    0.85    0.19
   9   5   2    0.40    0.17
   9   5   2    0.53    0.16
  -9   5  -2    0.50    0.15
 -10  -5  -2   -0.01    0.25
  10  -5   2   -0.15    0.20
  10   5   2   -0.23    0.18
 -10   5  -2   -0.15    0.18
 -10   5  -2   -0.12    0.20
  10   5   2    0.26    0.18
  11  -5   2   -0.14    0.31
  11  -5   2   -0.01    0.17
 -11  -5  -2   -0.22    0.16
 -11  -5  -2   -0.06    0.26
  11   5   2   -0.20    0.25
  11   5   2   -0.39    0.19
 -11   5  -2    0.21    0.19
  12  -5   2   -0.26    0.22
 -12  -5  -2   -0.28    0.18
 -12  -5  -2   -0.01    0.28
  12  -5   2    0.02    0.34
  12   5   2   -0.59    0.22
 -12  -6   2    0.19    0.23
  12  -6  -2    0.26    0.31
 -12  -6   2    0.40    0.29
  12   6  -2    0.05    0.27
 -12   6   2   -0.14    0.26
 -11  -6   2    0.25    0.27
  11  -6  -2    0.11    0.26
 -11  -6   2    0.32    0.20
 -11   6   2    0.66    0.44
  11   6  -2    0.25    0.24
  11   6  -2    0.18    0.26
 -11   6   2    0.52    0.22
 -10  -6   2    0.08    0.15
 -10  -6   2    0.03    0.17
 -10   6   2   -0.03    0.18
 -10   6   2   -0.45    0.20
  10   6  -2    0.00    0.19
  10   6  -2    0.00    0.19
  -9  -6   2    0.69    0.15
   9  -6  -2    0.89    0.21
  -9  -6   2    1.04    0.18
   9  -6  -2    0.74    0.21
   9   6  -2    0.80    0.17
  -9   6   2    0.80    0.16
   9   6  -2    0.95    0.18
  -9   6   2    0.62    0.17
   8  -6  -2    0.48    0.16
  -8  -6   2    0.58    0.14
  -8  -6   2    0.44    0.13
  -8  -6   2    0.79    0.13
   8  -6  -2    0.55    0.14
   8   6  -2    0.43    0.13
  -8   6   2    0.73    0.14
  -8   6   2    0.27    0.15
   8   6  -2    0.64    0.16
   7  -6  -2    0.28    0.10
   7  -6  -2    0.34    0.12
  -7  -6   2    0.41    0.09
  -7  -6   2    0.31    0.10
  -7  -6   2    0.51    0.11
   7   6  -2    0.34    0.11
  -7   6   2    0.22    0.11
   7   6  -2    0.38    0.11
  -7   6   2    0.45    0.13
   6  -6  -2    0.81    0.11
  -6  -6   2    0.80    0.10
   6  -6  -2    0.90    0.12
  -6  -6   2    0.78    0.10
  -6  -6   2    0.68    0.10
  -6   6   2    0.67    0.10
   6   6  -2    0.65    0.10
   6   6  -2    0.69    0.10
  -6   6   2    0.61    0.11
   5  -6  -2    3.26    0.16
  -5  -6   2    3.31    0.15
  -5  -6   2    3.23    0.15
  -5  -6   2    3.40    0.15
  -5  -6   2    3.51    0.16
   5  -6  -2    2.90    0.16
  -5   6   2    3.04    0.16
  -5   6   2    3.16    0.15
   5   6  -2    3.41    0.15
   5   6  -2    3.17    0.15
   4  -6  -2    5.71    0.20
  -4  -6   2    5.77    0.19
   4  -6  -2    5.69    0.20
   4  -6  -2    5.69    0.20
  -4  -6   2    5.98    0.21
   4  -6  -2    5.63    0.21
  -4  -6   2    5.68    0.19
  -4  -6   2    5.29    0.21
  -4   6   2    5.81    0.20
   4   6  -2    5.88    0.18
   4   6  -2    5.67    0.19
  -4   6   2    5.85    0.20
   3  -6  -2    0.61    0.08
  -3  -6   2    0.50    0.05
  -3  -6   2    0.73    0.08
  -3  -6   2    0.37    0.05
   3  -6  -2    0.54    0.07
  -3  -6   2    0.53    0.07
   3  -6  -2    0.56    0.07
   3   6  -2    0.78    0.09
   3   6  -2    0.58    0.07
   3   6  -2    0.42    0.05
   3   6  -2    0.49    0.06
  -3   6   2    0.47    0.06
  -3   6   2    0.53    0.06
   2  -6  -2    7.71    0.21
   2  -6  -2    7.62    0.24
  -2  -6   2    7.19    0.21
   2  -6  -2    7.70    0.21
   2  -6  -2    7.75    0.24
  -2  -6   2    7.76    0.24
  -2  -6   2    7.78    0.20
  -2  -6   2    7.56    0.23
   2   6  -2    7.85    0.22
   2   6  -2    7.99    0.23
  -2   6   2    7.86    0.21
   2   6  -2    8.25    0.26
  -2   6   2    7.70    0.21
   2   6  -2    7.57    0.19
   2   6  -2    7.75    0.23
   2   6  -2    7.69    0.19
   1  -6  -2   35.13    0.81
   1  -6  -2   35.30    0.80
  -1  -6   2   33.88    0.78
   1  -6  -2   35.51    0.84
   1  -6  -2   34.32    0.85
  -1  -6   2   35.69    0.87
  -1  -6   2   35.04    0.78
   1   6  -2   35.71    0.84
  -1   6   2   35.55    0.85
   1   6  -2   34.62    0.86
   1   6  -2   37.24    0.84
   1   6  -2   35.43    0.83
  -1   6   2   36.10    0.84
  -1   6   2   34.30    0.80
  -1   6   2   35.88    0.85
  -1   6   2   35.62    0.80
   0  -6  -2    0.17    0.05
   0  -6   2    0.11    0.04
   0  -6  -2    0.12    0.02
   0  -6  -2    0.09    0.02
   0  -6  -2    0.13    0.04
   0  -6   2    0.08    0.05
   0   6   2    0.02    0.04
   0   6   2    0.10    0.05
   0   6  -2    0.11    0.05
   0   6  -2    0.14    0.05
   0   6  -2    0.14    0.05
   0   6   2    0.10    0.05
   0   6  -2    0.09    0.04
   0   6   2    0.10    0.02
   0   6   2    0.11    0.02
  -1  -6  -2    0.21    0.03
   1  -6   2    0.23    0.06
  -1  -6  -2    0.23    0.05
   1  -6   2    0.21    0.03
  -1  -6  -2    0.23    0.03
  -1  -6  -2    0.24    0.07
   1  -6   2    0.24    0.03
   1  -6   2    0.13    0.05
   1  -6   2    0.26    0.06
   1   6   2    0.21    0.04
  -1   6  -2    0.23    0.03
   1   6   2    0.31    0.03
  -1   6  -2    0.20    0.03
  -1   6  -2    0.24    0.06
  -1   6  -2    0.20    0.05
   1   6   2    0.21    0.06
   1   6   2    0.22    0.02
   1   6   2    0.24    0.05
   1   6   2    0.17    0.05
  -2  -6  -2   15.88    0.38
  -2  -6  -2   16.13    0.41
   2  -6   2   16.06    0.44
   2  -6   2   16.25    0.40
  -2  -6  -2   16.95    0.43
   2  -6   2   16.06    0.42
   2  -6   2   16.26    0.39
   2   6   2   16.70    0.45
   2   6   2   15.97    0.38
  -2   6  -2   16.48    0.42
  -2   6  -2   16.08    0.39
   2   6   2   16.69    0.42
  -2   6  -2   16.26    0.39
   2   6   2   16.43    0.39
   2   6   2   15.87    0.40
  -3  -6  -2    3.19    0.12
   3  -6   2    3.35    0.15
  -3  -6  -2    3.60    0.13
   3  -6   2    3.30    0.13
   3  -6   2    3.50    0.16
  -3  -6  -2    3.76    0.16
  -3  -6  -2    3.24    0.12
  -3   6  -2    3.56    0.13
  -3   6  -2    3.20    0.13
   3   6   2    3.45    0.14
   3   6   2    3.40    0.13
   3   6   2    3.36    0.12
   4  -6   2    2.26    0.13
  -4  -6  -2    2.23    0.11
   4  -6   2    2.18    0.12
  -4  -6  -2    1.98    0.13
  -4  -6  -2    2.13    0.11
   4  -6   2    2.30    0.13
   4   6   2    2.31    0.11
   4   6   2    2.18    0.12
  -4   6  -2    2.32    0.12
   4   6   2    2.11    0.12
  -4   6  -2    2.17    0.13
  -5  -6  -2    0.02    0.06
  -5  -6  -2    0.07    0.06
   5  -6   2   -0.08    0.08
   5  -6   2    0.11    0.07
  -5  -6  -2   -0.02    0.06
   5  -6   2   -0.07    0.06
  -5   6  -2    0.03    0.06
  -5   6  -2    0.01    0.07
   5   6   2    0.01    0.06
   5   6   2   -0.04    0.06
  -6  -6  -2    0.94    0.11
   6  -6   2    0.86    0.12
   6  -6   2    0.91    0.12
   6  -6   2    0.73    0.11
  -6  -6  -2    1.13    0.13
  -6  -6  -2    0.98    0.11
  -6   6  -2    0.95    0.12
  -6   6  -2    0.96    0.11
   6   6   2    0.85    0.11
   6   6   2    0.90    0.11
  -7  -6  -2    0.22    0.10
  -7  -6  -2    0.04    0.09
   7  -6   2    0.10    0.10
   7  -6   2    0.15    0.10
  -7  -6  -2    0.20    0.08
   7  -6   2    0.06    0.11
   7   6   2    0.16    0.11
   7   6   2    0.20    0.10
  -7   6  -2    0.26    0.14
  -7   6  -2    0.00    0.11
  -8  -6  -2    0.42    0.14
  -8  -6  -2    0.58    0.11
   8  -6   2    0.48    0.13
  -8  -6  -2    0.55    0.13
   8  -6   2    0.25    0.16
   8  -6   2    0.31    0.15
  -8   6  -2    0.46    0.15
   8   6   2    0.32    0.21
  -8   6  -2    0.49    0.15
   8   6   2    0.65    0.14
   9  -6   2   -0.10    0.16
  -9  -6  -2   -0.17    0.13
  -9  -6  -2    0.11    0.14
  -9  -6  -2    0.23    0.15
   9  -6   2    0.24    0.20
   9  -6   2    0.36    0.14
   9   6   2    0.18    0.15
   9   6   2    0.05    0.16
  -9   6  -2   -0.14    0.17
  -9   6  -2    0.18    0.13
  10  -6   2    0.32    0.38
 -10  -6  -2    0.23    0.19
 -10  -6  -2   -0.13    0.15
  10  -6   2    0.02    0.16
  10   6   2   -0.14    0.20
 -10   6  -2    0.02    0.23
 -10   6  -2    0.27    0.18
  10   6   2    0.15    0.21
  11  -6   2    0.47    0.21
 -11  -6  -2   -0.06    0.27
  11  -6   2    0.09    0.28
 -11  -6  -2    0.02    0.18
  11   6   2   -0.06    0.21
 -11   6  -2    0.19    0.17
  11   6   2    0.05    0.22
 -11   6  -2   -0.06    0.31
  12  -6   2    0.07    0.25
 -12  -6  -2   -0.01    0.21
  12  -6   2    0.23    0.40
 -12  -6  -2   -0.21    0.27
 -12   6  -2   -0.29    0.28
  12   6   2    0.20    0.33
  12  -7  -2    0.20    0.35
 -12  -7   2    0.52    0.29
  12  -7  -2    0.23    0.26
 -12  -7   2    0.89    0.25
  12   7  -2    0.33    0.48
 -11  -7   2    0.04    0.21
  11  -7  -2   -0.04    0.31
  11  -7  -2    0.04    0.22
 -11  -7   2    0.51    0.28
  11   7  -2   -0.35    0.22
  11   7  -2    0.02    0.14
  10  -7  -2    1.23    0.21
 -10  -7   2    1.47    0.20
  10  -7  -2    1.11    0.30
 -10  -7   2    1.15    0.21
 -10   7   2    1.34    0.19
  10   7  -2    1.38    0.23
  10   7  -2    1.32    0.22
 -10   7   2    1.08    0.26
  -9  -7   2    0.95    0.17
   9  -7  -2    1.05    0.18
   9  -7  -2    1.14    0.22
  -9  -7   2    0.63    0.18
  -9  -7   2    0.40    0.20
   9   7  -2    0.64    0.17
  -9   7   2    0.89    0.18
  -9   7   2    0.63    0.20
   9   7  -2    0.65    0.16
  -8  -7   2    0.24    0.14
   8  -7  -2    0.64    0.17
   8  -7  -2    0.39    0.14
  -8  -7   2    0.38    0.15
  -8  -7   2    0.57    0.17
   8  -7  -2    0.49    0.15
  -8  -7   2    0.45    0.13
  -8   7   2    0.47    0.16
   8   7  -2    0.40    0.14
   8   7  -2    0.63    0.13
  -8   7   2    0.38    0.15
  -7  -7   2    0.25    0.10
  -7  -7   2    0.22    0.10
   7  -7  -2    0.23    0.11
  -7  -7   2    0.24    0.12
  -7  -7   2    0.17    0.11
   7  -7  -2    0.22    0.10
   7  -7  -2    0.21    0.12
   7   7  -2    0.15    0.10
  -7   7   2    0.30    0.12
  -7   7   2    0.23    0.14
   7   7  -2    0.10    0.13
  -6  -7   2   -0.16    0.07
  -6  -7   2   -0.05    0.09
   6  -7  -2    0.11    0.10
   6  -7  -2    0.01    0.09
  -6  -7   2   -0.02    0.08
   6  -7  -2   -0.07    0.09
  -6  -7   2    0.01    0.08
   6   7  -2    0.01    0.08
  -6   7   2   -0.06    0.08
  -6   7   2   -0.09    0.08
   6   7  -2   -0.06    0.08
   5  -7  -2    2.47    0.16
  -5  -7   2    2.27    0.14
  -5  -7   2    2.29    0.14
   5  -7  -2    2.35    0.14
   5  -7  -2    2.64    0.17
  -5  -7   2    2.39    0.16
   5  -7  -2    2.18    0.14
  -5  -7   2    2.43    0.14
   5   7  -2    2.22    0.13
  -5   7   2    2.44    0.15
  -5   7   2    2.48    0.15
   5   7  -2    2.26    0.13
   4  -7  -2    0.34    0.08
   4  -7  -2    0.39    0.07
  -4  -7   2    0.46    0.09
  -4  -7   2    0.30    0.06
  -4  -7   2    0.49    0.09
   4  -7  -2    0.48    0.09
  -4  -7   2    0.26    0.06
   4   7  -2    0.37    0.08
   4   7  -2    0.28    0.06
  -4   7   2    0.39    0.07
  -4   7   2    0.36    0.07
   4   7  -2    0.25    0.06
   3  -7  -2    0.46    0.07
   3  -7  -2    0.35    0.06
  -3  -7   2    0.39    0.08
   3  -7  -2    0.34    0.06
   3  -7  -2    0.45    0.09
  -3  -7   2    0.43    0.09
  -3  -7   2    0.36    0.05
   3   7  -2    0.38    0.09
  -3   7   2    0.37    0.05
   3   7  -2    0.48    0.07
   3   7  -2    0.45    0.09
   3   7  -2    0.38    0.05
   3   7  -2    0.36    0.05
  -3   7   2    0.34    0.06
   2  -7  -2    0.90    0.07
  -2  -7   2    0.87    0.05
  -2  -7   2    0.89    0.10
  -2  -7   2    0.95    0.10
  -2  -7   2    0.89    0.05
   2  -7  -2    0.74    0.09
   2  -7  -2    1.00    0.09
  -2   7   2    0.86    0.06
   2   7  -2    0.85    0.05
   2   7  -2    0.90    0.09
   2   7  -2    0.79    0.05
   2   7  -2    0.87    0.11
   2   7  -2    0.88    0.09
  -2   7   2    0.96    0.06
   2   7  -2    0.70    0.09
   1  -7  -2    2.63    0.08
   1  -7  -2    2.43    0.13
   1  -7  -2    2.61    0.08
   1  -7  -2    2.33    0.13
  -1  -7   2    2.51    0.14
  -1   7   2    2.58    0.08
   1   7  -2    2.41    0.13
  -1   7   2    2.55    0.13
  -1   7   2    2.73    0.15
   1   7  -2    2.50    0.14
   1   7  -2    2.61    0.13
   1   7  -2    2.51    0.12
  -1   7   2    2.65    0.08
  -1   7   2    2.44    0.14
   1   7  -2    2.53    0.14
   0  -7  -2    7.64    0.18
   0  -7  -2    7.85    0.18
   0  -7  -2    7.56    0.25
   0  -7   2    7.10    0.23
   0  -7  -2    7.11    0.23
   0  -7   2    7.73    0.26
   0   7  -2    7.82    0.25
   0   7  -2    7.25    0.23
   0   7   2    7.68    0.24
   0   7   2    7.41    0.25
   0   7   2    7.41    0.25
   0   7  -2    7.25    0.24
   0   7  -2    8.08    0.26
  -1  -7  -2    0.63    0.07
  -1  -7  -2    0.74    0.10
  -1  -7  -2    0.68    0.04
   1  -7   2    0.58    0.09
   1  -7   2    0.51    0.04
  -1  -7  -2    0.52    0.03
   1  -7   2    0.59    0.08
   1  -7   2    0.56    0.08
   1  -7   2    0.66    0.05
   1   7   2    0.60    0.03
   1   7   2    0.65    0.08
  -1   7  -2    0.59    0.08
  -1   7  -2    0.52    0.04
   1   7   2    0.64    0.07
   1   7   2    0.67    0.08
  -1   7  -2    0.65    0.10
   1   7   2    0.60    0.08
  -1   7  -2    0.55    0.04
   1   7   2    0.61    0.03
  -2  -7  -2    0.44    0.09
   2  -7   2    0.62    0.08
   2  -7   2    0.49    0.06
  -2  -7  -2    0.49    0.05
  -2  -7  -2    0.52    0.05
   2  -7   2    0.61    0.09
   2   7   2    0.51    0.06
   2   7   2    0.54    0.08
  -2   7  -2    0.48    0.06
  -2   7  -2    0.49    0.06
  -2   7  -2    0.54    0.10
   2   7   2    0.51    0.08
   2   7   2    0.45    0.05
   2   7   2    0.54    0.05
   3  -7   2    4.99    0.21
   3  -7   2    4.74    0.19
   3  -7   2    4.99    0.16
   3  -7   2    4.82    0.17
  -3  -7  -2    4.98    0.15
  -3  -7  -2    4.21    0.22
  -3  -7  -2    5.10    0.18
  -3  -7  -2    5.11    0.16
  -3   7  -2    4.87    0.16
   3   7   2    4.96    0.16
   3   7   2    5.22    0.20
   3   7   2    5.16    0.16
  -3   7  -2    4.85    0.16
   3   7   2    4.93    0.15
  -4  -7  -2    2.03    0.12
   4  -7   2    1.97    0.13
  -4  -7  -2    2.21    0.11
  -4  -7  -2    2.23    0.12
   4  -7   2    2.16    0.14
   4  -7   2    2.23    0.14
  -4  -7  -2    2.04    0.14
   4  -7   2    2.26    0.14
   4   7   2    2.18    0.17
   4   7   2    2.17    0.12
  -4   7  -2    2.07    0.12
   4   7   2    2.32    0.11
  -4   7  -2    2.03    0.12
   5  -7   2    2.10    0.16
   5  -7   2    1.74    0.14
  -5  -7  -2    1.86    0.13
  -5  -7  -2    1.95    0.15
  -5  -7  -2    1.77    0.13
  -5  -7  -2    1.96    0.12
   5  -7   2    2.03    0.15
  -5   7  -2    1.99    0.14
   5   7   2    2.09    0.14
   5   7   2    1.97    0.16
   5   7   2    1.85    0.12
  -5   7  -2    1.93    0.13
  -6  -7  -2   -0.02    0.08
   6  -7   2   -0.04    0.10
   6  -7   2    0.02    0.09
  -6  -7  -2   -0.01    0.10
  -6  -7  -2    0.08    0.08
   6  -7   2   -0.02    0.10
  -6  -7  -2    0.04    0.08
   6   7   2    0.03    0.08
   6   7   2   -0.10    0.08
  -6   7  -2    0.06    0.09
  -6   7  -2   -0.02    0.08
   7  -7   2    3.41    0.22
  -7  -7  -2    3.64    0.19
   7  -7   2    3.28    0.21
  -7  -7  -2    3.39    0.21
   7  -7   2    3.74    0.24
  -7  -7  -2    3.39    0.20
  -7   7  -2    3.23    0.23
   7   7   2    3.84    0.27
   7   7   2    3.26    0.20
  -7   7  -2    3.66    0.22
   8  -7   2    0.33    0.14
  -8  -7  -2    0.36    0.13
   8  -7   2    0.31    0.14
   8  -7   2    0.46    0.13
  -8  -7  -2    0.33    0.13
  -8  -7  -2    0.45    0.12
  -8   7  -2    0.17    0.14
   8   7   2    0.40    0.14
   8   7   2    0.14    0.15
  -8   7  -2    0.28    0.14
   9  -7   2    0.12    0.20
  -9  -7  -2    0.20    0.16
  -9  -7  -2    0.26    0.20
  -9   7  -2    0.17    0.18
   9   7   2    0.10    0.18
   9   7   2    0.38    0.17
  -9   7  -2   -0.10    0.16
 -10  -7  -2    0.17    0.20
  10  -7   2   -0.08    0.18
 -10  -7  -2   -0.18    0.17
  10   7   2   -0.04    0.19
  10   7   2    0.14    0.18
 -10   7  -2    0.19    0.21
 -10   7  -2    0.38    0.20
 -11  -7  -2    0.24    0.24
 -11  -7  -2    0.70    0.33
  11  -7   2    0.19    0.22
  11  -7   2    0.15    0.32
 -11   7  -2    0.11    0.30
  11   7   2    0.47    0.17
 -11   7  -2    0.24    0.16
  11   7   2   -0.26    0.24
  11  -8  -2    0.17    0.24
 -11  -8   2    1.17    0.32
 -11  -8   2    0.15    0.22
  11  -8  -2   -0.57    0.31
  11   8  -2   -0.41    0.16
 -11   8   2   -0.37    0.37
 -10  -8   2    0.13    0.20
  10  -8  -2    0.20    0.20
 -10  -8   2    0.27    0.20
  10  -8  -2   -0.03    0.27
 -10   8   2    0.23    0.19
  10   8  -2    0.22    0.20
 -10   8   2   -0.03    0.25
  10   8  -2   -0.31    0.19
   9  -8  -2    0.31    0.20
  -9  -8   2    0.44    0.17
   9  -8  -2    0.34    0.17
  -9  -8   2    0.20    0.19
  -9  -8   2    0.17    0.19
   9   8  -2    0.00    0.23
   9   8  -2    0.23    0.16
  -9   8   2   -0.03    0.16
  -9   8   2    0.57    0.18
  -8  -8   2    0.13    0.16
  -8  -8   2    0.25    0.14
  -8  -8   2   -0.16    0.12
   8  -8  -2    0.16    0.15
   8  -8  -2    0.14    0.13
  -8  -8   2   -0.19    0.14
   8  -8  -2    0.06    0.15
   8   8  -2    0.13    0.16
  -8   8   2    0.16    0.13
  -8   8   2    0.03    0.14
   8   8  -2    0.09    0.13
  -7  -8   2    0.57    0.14
   7  -8  -2    0.58    0.15
  -7  -8   2    0.67    0.14
   7  -8  -2    0.72    0.15
   7  -8  -2    0.54    0.14
  -7  -8   2    0.67    0.12
  -7  -8   2    0.64    0.13
   7   8  -2    0.42    0.15
  -7   8   2    0.55    0.13
  -7   8   2    0.67    0.13
   7   8  -2    0.64    0.12
   6  -8  -2    0.30    0.12
  -6  -8   2    0.33    0.10
  -6  -8   2    0.30    0.12
  -6  -8   2    0.39    0.09
   6  -8  -2    0.20    0.10
   6  -8  -2    0.16    0.09
   6  -8  -2    0.35    0.12
  -6  -8   2    0.16    0.09
   6   8  -2    0.26    0.09
  -6   8   2    0.34    0.09
  -6   8   2    0.12    0.09
   6   8  -2    0.27    0.09
   5  -8  -2    0.74    0.12
  -5  -8   2    0.68    0.09
  -5  -8   2    0.90    0.12
   5  -8  -2    0.83    0.10
   5  -8  -2    0.75    0.10
   5  -8  -2    0.88    0.11
  -5  -8   2    0.86    0.12
  -5   8   2    0.71    0.09
   5   8  -2    0.91    0.14
  -5   8   2    0.72    0.10
   5   8  -2    0.53    0.09
   5   8  -2    0.77    0.09
   4  -8  -2    2.82    0.16
   4  -8  -2    2.91    0.15
  -4  -8   2    3.00    0.13
  -4  -8   2    2.69    0.18
  -4  -8   2    2.74    0.13
   4  -8  -2    2.96    0.18
  -4  -8   2    3.03    0.16
   4  -8  -2    2.72    0.14
   4   8  -2    2.84    0.12
   4   8  -2    2.55    0.13
  -4   8   2    2.74    0.13
  -4   8   2    2.90    0.14
   4   8  -2    2.91    0.18
   4   8  -2    2.99    0.18
  -3  -8   2    6.21    0.17
  -3  -8   2    6.16    0.17
   3  -8  -2    6.20    0.19
   3  -8  -2    6.07    0.19
   3  -8  -2    6.10    0.23
  -3  -8   2    6.26    0.22
   3  -8  -2    5.82    0.23
  -3  -8   2    5.80    0.26
   3   8  -2    5.87    0.20
  -3   8   2    6.08    0.19
  -3   8   2    6.03    0.19
   3   8  -2    6.06    0.17
   3   8  -2    6.09    0.24
   3   8  -2    6.58    0.25
   3   8  -2    6.13    0.17
   2  -8  -2    1.68    0.10
  -2  -8   2    1.60    0.06
   2  -8  -2    1.70    0.08
  -2  -8   2    1.57    0.06
   2  -8  -2    1.56    0.14
   2  -8  -2    1.53    0.12
   2   8  -2    1.91    0.13
   2   8  -2    1.77    0.11
  -2   8   2    1.61    0.08
  -2   8   2    1.59    0.08
   2   8  -2    1.68    0.12
   1  -8  -2   -0.03    0.02
   1  -8  -2   -0.01    0.02
  -1  -8   2    0.00    0.05
   1  -8  -2    0.05    0.07
   1  -8  -2   -0.03    0.05
  -1   8   2   -0.03    0.05
   1   8  -2    0.06    0.06
   1   8  -2    0.00    0.05
   1   8  -2   -0.02    0.06
  -1   8   2    0.12    0.07
   1   8  -2   -0.06    0.06
   1   8  -2    0.02    0.08
  -1   8   2    0.01    0.02
  -1   8   2   -0.01    0.02
  -1   8   2    0.03    0.07
   0  -8   2    0.20    0.07
   0  -8   2    0.24    0.07
   0  -8  -2    0.20    0.06
   0  -8  -2    0.29    0.07
   0   8   2    0.30    0.06
   0   8  -2    0.32    0.09
   0   8  -2    0.32    0.07
   0   8  -2    0.38    0.08
   0   8   2    0.25    0.07
   0   8   2    0.17    0.07
   0   8  -2    0.22    0.08
   0   8   2    0.21    0.09
   1  -8   2    0.79    0.10
  -1  -8  -2    0.78    0.10
   1  -8   2    0.73    0.04
   1  -8   2    0.80    0.05
   1  -8   2    0.68    0.11
  -1   8  -2    0.70    0.04
  -1   8  -2    0.59    0.09
  -1   8  -2    0.65    0.05
   1   8   2    0.62    0.09
   1   8   2    0.75    0.09
   1   8   2    0.68    0.09
   1   8   2    0.81    0.08
  -1   8  -2    0.79    0.12
   1   8   2    0.85    0.11
   2  -8   2    2.93    0.16
  -2  -8  -2    2.59    0.08
  -2  -8  -2    2.63    0.09
   2  -8   2    2.71    0.14
   2  -8   2    2.43    0.15
   2  -8   2    2.71    0.10
  -2  -8  -2    3.20    0.18
   2   8   2    2.67    0.09
  -2   8  -2    2.56    0.10
  -2   8  -2    2.63    0.10
   2   8   2    2.93    0.16
   2   8   2    2.60    0.08
   2   8   2    2.57    0.12
  -2   8  -2    2.59    0.18
  -3  -8  -2    1.09    0.08
   3  -8   2    1.13    0.13
  -3  -8  -2    1.19    0.11
  -3  -8  -2    1.25    0.14
   3  -8   2    0.91    0.09
   3  -8   2    1.10    0.09
   3  -8   2    1.10    0.12
  -3   8  -2    1.02    0.08
   3   8   2    0.92    0.11
   3   8   2    0.98    0.07
   3   8   2    1.38    0.13
   3   8   2    0.94    0.08
   3   8   2    0.97    0.09
  -3   8  -2    0.98    0.09
  -4  -8  -2   -0.05    0.09
   4  -8   2    0.01    0.07
   4  -8   2    0.06    0.07
  -4  -8  -2    0.04    0.06
   4  -8   2   -0.03    0.08
   4  -8   2    0.02    0.07
  -4  -8  -2   -0.02    0.07
  -4   8  -2   -0.07    0.05
   4   8   2    0.07    0.05
  -4   8  -2    0.09    0.06
   4   8   2   -0.04    0.05
  -5  -8  -2    0.14    0.07
   5  -8   2    0.10    0.09
   5  -8   2    0.20    0.09
   5  -8   2    0.15    0.09
  -5  -8  -2    0.19    0.09
  -5  -8  -2    0.32    0.11
   5  -8   2    0.12    0.10
  -5  -8  -2    0.15    0.07
   5   8   2    0.14    0.10
   5   8   2    0.21    0.07
   5   8   2    0.14    0.07
  -5   8  -2    0.16    0.08
  -5   8  -2    0.22    0.08
  -6  -8  -2    1.62    0.17
   6  -8   2    1.70    0.18
   6  -8   2    1.82    0.18
  -6  -8  -2    1.61    0.16
  -6  -8  -2    1.62    0.15
  -6  -8  -2    2.05    0.15
   6  -8   2    1.50    0.17
   6   8   2    1.63    0.16
   6   8   2    2.14    0.18
   6   8   2    1.61    0.15
  -6   8  -2    2.06    0.17
  -6   8  -2    1.77    0.17
  -7  -8  -2    0.69    0.12
  -7  -8  -2    0.70    0.13
   7  -8   2    0.79    0.15
  -7  -8  -2    0.63    0.17
   7  -8   2    0.62    0.15
   7  -8   2    0.53    0.14
  -7  -8  -2    0.84    0.13
  -7   8  -2    0.72    0.21
   7   8   2    0.65    0.12
   7   8   2    0.82    0.16
   7   8   2    0.62    0.14
  -7   8  -2    0.85    0.14
   8  -8   2    0.15    0.16
  -8  -8  -2   -0.26    0.15
   8  -8   2   -0.22    0.13
  -8  -8  -2    0.04    0.13
  -8  -8  -2   -0.13    0.12
  -8  -8  -2   -0.05    0.13
   8   8   2   -0.07    0.12
   8   8   2    0.08    0.14
  -8   8  -2   -0.12    0.12
   8   8   2    0.11    0.15
  -8   8  -2    0.12    0.15
  -9  -8  -2    0.03    0.16
   9  -8   2   -0.07    0.19
  -9  -8  -2    0.08    0.18
   9  -8   2    0.16    0.17
  -9   8  -2    0.13    0.19
  -9   8  -2   -0.04    0.17
   9   8   2   -0.42    0.21
   9   8   2    0.03    0.18
  10  -8   2    0.38    0.21
 -10  -8  -2    0.26    0.22
  10  -8   2   -0.01    0.30
 -10  -8  -2    0.58    0.19
 -10   8  -2    0.04    0.19
  10   8   2    0.13    0.21
  10   8   2   -0.02    0.21
 -10   8  -2   -0.08    0.21
  11  -8   2   -0.06    0.23
 -11  -8  -2   -0.06    0.23
 -11  -8  -2    0.33    0.30
  11  -8   2    0.42    0.33
 -11  -9   2   -0.35    0.25
  11  -9  -2   -0.04    0.30
  11  -9  -2    0.42    0.27
  11   9  -2   -0.10    0.12
 -11   9   2   -0.40    0.23
 -10  -9   2    0.67    0.22
  10  -9  -2    0.92    0.25
  10  -9  -2    0.62    0.31
 -10  -9   2    0.31    0.21
 -10   9   2    0.63    0.28
  10   9  -2    0.75    0.22
 -10   9   2    0.47    0.20
   9  -9  -2    0.26    0.21
  -9  -9   2    0.27    0.16
   9  -9  -2    0.05    0.13
   9  -9  -2   -0.04    0.18
  -9  -9   2    0.34    0.28
  -9  -9   2    0.11    0.17
  -9   9   2    0.08    0.16
   9   9  -2   -0.06    0.16
  -9   9   2    0.18    0.20
   9   9  -2    0.02    0.16
   8  -9  -2    0.46    0.13
  -8  -9   2   -0.02    0.18
   8  -9  -2   -0.18    0.15
   8  -9  -2    0.23    0.18
  -8  -9   2    0.48    0.13
   8  -9  -2    0.31    0.16
  -8  -9   2    0.32    0.15
  -8  -9   2    0.20    0.18
   8   9  -2    0.14    0.14
  -8   9   2    0.05    0.16
  -8   9   2    0.41    0.15
   8   9  -2    0.17    0.15
   7  -9  -2    0.11    0.09
  -7  -9   2    0.07    0.14
   7  -9  -2    0.17    0.13
  -7  -9   2    0.26    0.16
  -7  -9   2    0.20    0.13
  -7  -9   2    0.11    0.10
   7  -9  -2    0.05    0.14
   7  -9  -2    0.33    0.14
  -7   9   2    0.14    0.13
   7   9  -2    0.09    0.10
   7   9  -2    0.23    0.12
  -7   9   2    0.08    0.11
   7   9  -2    0.10    0.13
  -6  -9   2    1.52    0.15
   6  -9  -2    1.39    0.17
   6  -9  -2    1.92    0.19
   6  -9  -2    1.66    0.20
  -6  -9   2    1.66    0.16
  -6  -9   2    1.93    0.21
   6  -9  -2    1.87    0.17
  -6  -9   2    1.46    0.18
   6   9  -2    1.97    0.16
  -6   9   2    1.93    0.19
  -6   9   2    1.70    0.17
   6   9  -2    1.96    0.19
   6   9  -2    1.57    0.14
   6   9  -2    1.74    0.17
  -5  -9   2    0.06    0.07
   5  -9  -2   -0.05    0.08
  -5  -9   2   -0.02    0.07
  -5  -9   2    0.10    0.11
   5  -9  -2    0.09    0.09
  -5  -9   2    0.03    0.13
   5  -9  -2    0.05    0.11
   5  -9  -2   -0.07    0.08
   5   9  -2   -0.02    0.10
   5   9  -2   -0.01    0.06
   5   9  -2    0.13    0.10
  -5   9   2    0.03    0.08
  -5   9   2   -0.04    0.07
   5   9  -2    0.03    0.06
   4  -9  -2    1.28    0.12
  -4  -9   2    1.57    0.16
  -4  -9   2    1.49    0.18
   4  -9  -2    1.18    0.13
   4  -9  -2    1.35    0.17
  -4  -9   2    1.32    0.10
   4   9  -2    1.21    0.10
   4   9  -2    1.20    0.12
  -4   9   2    1.29    0.11
   4   9  -2    1.41    0.16
  -4   9   2    1.44    0.11
   4   9  -2    1.09    0.13
   4   9  -2    1.43    0.09
  -3  -9   2    1.49    0.14
   3  -9  -2    1.85    0.11
   3  -9  -2    1.58    0.14
  -3  -9   2    1.64    0.08
   3  -9  -2    1.61    0.16
   3  -9  -2    1.55    0.11
  -3  -9   2    1.74    0.08
  -3  -9   2    1.70    0.17
   3   9  -2    1.64    0.16
   3   9  -2    1.65    0.08
   3   9  -2    1.69    0.07
  -3   9   2    1.61    0.09
   3   9  -2    1.90    0.13
   3   9  -2    1.50    0.16
  -3   9   2    1.76    0.10
   2  -9  -2    3.59    0.12
   2  -9  -2    3.62    0.12
   2  -9  -2    3.73    0.19
   2  -9  -2    3.57    0.15
   2  -9  -2    3.75    0.19
   2   9  -2    3.42    0.19
   2   9  -2    3.66    0.18
  -2   9   2    3.63    0.11
  -2   9   2    3.34    0.19
   2   9  -2    3.58    0.16
  -2   9   2    3.66    0.15
   2   9  -2    3.57    0.19
   1  -9  -2    0.60    0.04
   1  -9  -2    0.59    0.09
   1  -9  -2    0.33    0.08
  -1  -9   2    0.52    0.09
   1  -9  -2    0.50    0.04
  -1   9   2    0.50    0.02
  -1   9   2    0.52    0.03
  -1   9   2    0.58    0.10
   1   9  -2    0.40    0.08
   1   9  -2    0.53    0.09
   1   9  -2    0.49    0.10
   1   9  -2    0.49    0.09
  -1   9   2    0.47    0.10
   1   9  -2    0.46    0.09
   0  -9   2    0.06    0.07
   0  -9   2   -0.05    0.06
   0  -9  -2   -0.07    0.07
   0   9   2   -0.03    0.07
   0   9  -2    0.03    0.09
   0   9  -2   -0.06    0.08
   0   9   2    0.09    0.08
   0   9  -2    0.00    0.08
   0   9   2   -0.01    0.09
   0   9  -2    0.13    0.07
   0   9   2   -0.06    0.06
   1  -9   2    0.13    0.02
   1  -9   2    0.25    0.08
   1  -9   2    0.13    0.02
  -1  -9  -2    0.12    0.08
   1  -9   2    0.26    0.07
   1   9   2    0.20    0.09
  -1   9  -2    0.08    0.08
   1   9   2    0.12    0.06
  -1   9  -2    0.19    0.09
   1   9   2    0.09    0.06
  -1   9  -2    0.10    0.10
   1   9   2    0.12    0.09
  -1   9  -2    0.07    0.09
   1   9   2    0.17    0.07
   2  -9   2    0.11    0.04
   2  -9   2    0.11    0.04
  -2  -9  -2    0.10    0.02
   2  -9   2    0.14    0.08
  -2  -9  -2    0.19    0.10
   2  -9   2    0.12    0.07
  -2  -9  -2    0.16    0.03
   2  -9   2    0.18    0.08
   2   9   2    0.08    0.08
  -2   9  -2    0.08    0.04
  -2   9  -2    0.11    0.04
   2   9   2    0.15    0.08
   2   9   2    0.18    0.07
   2   9   2    0.08    0.10
  -2   9  -2   -0.01    0.08
  -3  -9  -2   -0.15    0.10
   3  -9   2   -0.07    0.05
  -3  -9  -2    0.01    0.04
   3  -9   2    0.03    0.07
   3  -9   2    0.01    0.09
  -3  -9  -2    0.03    0.04
   3  -9   2    0.01    0.05
  -3   9  -2    0.01    0.05
   3   9   2    0.05    0.10
   3   9   2    0.07    0.03
   3   9   2   -0.03    0.06
  -3   9  -2   -0.07    0.04
   3   9   2    0.02    0.04
   4  -9   2   -0.02    0.09
  -4  -9  -2    0.03    0.08
  -4  -9  -2    0.04    0.11
  -4  -9  -2   -0.03    0.05
  -4  -9  -2    0.01    0.05
   4  -9   2   -0.12    0.06
   4  -9   2   -0.02    0.07
   4   9   2   -0.01    0.05
  -4   9  -2    0.02    0.06
   4   9   2    0.17    0.09
   4   9   2   -0.08    0.10
  -4   9  -2    0.01    0.06
   4   9   2   -0.13    0.05
   5  -9   2    2.24    0.17
   5  -9   2    1.93    0.19
  -5  -9  -2    2.13    0.15
   5  -9   2    2.24    0.18
  -5  -9  -2    1.88    0.19
   5  -9   2    2.10    0.16
  -5  -9  -2    2.57    0.17
  -5  -9  -2    1.92    0.13
   5   9   2    1.80    0.15
   5   9   2    2.04    0.19
   5   9   2    2.14    0.13
  -5   9  -2    2.29    0.15
  -5   9  -2    2.11    0.16
  -6  -9  -2    0.20    0.10
   6  -9   2    0.23    0.12
  -6  -9  -2    0.40    0.12
   6  -9   2    0.29    0.12
  -6  -9  -2    0.27    0.15
   6  -9   2    0.34    0.12
   6  -9   2    0.34    0.12
  -6  -9  -2    0.38    0.09
   6   9   2    0.25    0.11
  -6   9  -2    0.34    0.12
   6   9   2    0.49    0.10
   6   9   2    0.24    0.13
  -6   9  -2    0.10    0.10
  -7  -9  -2    0.48    0.13
   7  -9   2    0.42    0.15
  -7  -9  -2    0.49    0.13
   7  -9   2    0.41    0.14
  -7  -9  -2    0.05    0.15
   7  -9   2    0.50    0.15
   7  -9   2    0.22    0.14
  -7  -9  -2    0.21    0.11
  -7   9  -2    0.37    0.14
   7   9   2    0.16    0.14
  -7   9  -2    0.42    0.13
   7   9   2    0.34    0.11
   7   9   2    0.53    0.15
   8  -9   2    0.04    0.15
   8  -9   2    0.03    0.17
  -8  -9  -2    0.12    0.15
  -8  -9  -2    0.01    0.14
   8   9   2   -0.15    0.14
   8   9   2   -0.09    0.13
   8   9   2    0.41    0.17
  -8   9  -2   -0.05    0.16
  -8   9  -2    0.20    0.14
   9  -9   2    0.30    0.19
  -9  -9  -2    0.50    0.18
  -9  -9  -2    0.01    0.18
   9  -9   2    0.02    0.19
  -9   9  -2    0.13    0.20
   9   9   2    0.36    0.18
   9   9   2    0.08    0.18
   9   9   2    0.52    0.20
  -9   9  -2    0.04    0.15
 -10  -9  -2    0.17    0.21
 -10  -9  -2   -0.10    0.20
  10  -9   2   -0.21    0.21
  10  -9   2   -0.17    0.32
  10   9   2    0.04    0.22
 -10   9  -2    0.25    0.26
 -10   9  -2   -0.25    0.14
  11  -9   2    0.13    0.26
  11  -9   2    0.58    0.36
 -11  -9  -2    0.12    0.28
 -11   9  -2   -0.54    0.25
  10 -10  -2    0.04    0.37
  10 -10  -2    0.09    0.17
  10 -10  -2    0.11    0.24
 -10 -10   2    0.19    0.22
  10  10  -2   -0.45    0.21
  -9 -10   2    0.07    0.19
   9 -10  -2   -0.09    0.21
  -9 -10   2    0.08    0.17
   9 -10  -2    0.00    0.14
   9 -10  -2   -0.08    0.20
  -9  10   2    0.12    0.22
   9  10  -2   -0.27    0.17
  -9  10   2   -0.18    0.17
   9  10  -2   -0.06    0.17
  -8 -10   2    1.00    0.16
   8 -10  -2    0.96    0.17
   8 -10  -2    0.76    0.19
  -8 -10   2    0.97    0.21
  -8 -10   2    1.06    0.24
   8 -10  -2    1.03    0.21
  -8  10   2    0.77    0.17
   8  10  -2    1.03    0.10
   8  10  -2    0.74    0.16
   8  10  -2    1.19    0.16
   7 -10  -2    0.05    0.15
  -7 -10   2    0.16    0.17
  -7 -10   2    0.10    0.18
   7 -10  -2   -0.06    0.15
   7 -10  -2    0.02    0.14
  -7 -10   2    0.16    0.12
   7 -10  -2   -0.09    0.10
  -7 -10   2   -0.10    0.11
   7  10  -2   -0.01    0.10
  -7  10   2    0.16    0.14
  -7  10   2   -0.17    0.12
   7  10  -2    0.25    0.10
   7  10  -2    0.29    0.15
   7  10  -2   -0.05    0.13
   6 -10  -2    0.05    0.10
  -6 -10   2    0.22    0.15
   6 -10  -2    0.12    0.14
  -6 -10   2    0.18    0.17
   6 -10  -2    0.33    0.12
   6 -10  -2    0.35    0.13
  -6 -10   2    0.18    0.14
  -6 -10   2    0.39    0.10
   6  10  -2    0.14    0.10
   6  10  -2    0.15    0.08
   6  10  -2    0.20    0.15
   6  10  -2    0.11    0.11
  -6  10   2    0.02    0.12
  -6  10   2    0.17    0.12
  -5 -10   2    1.55    0.12
  -5 -10   2    1.89    0.19
   5 -10  -2    1.79    0.19
   5 -10  -2    2.15    0.17
  -5 -10   2    1.95    0.13
   5 -10  -2    2.07    0.17
  -5 -10   2    2.01    0.20
   5 -10  -2    1.72    0.17
   5  10  -2    1.71    0.20
   5  10  -2    1.92    0.20
  -5  10   2    1.92    0.15
  -5  10   2    1.84    0.16
   5  10  -2    1.95    0.13
   5  10  -2    1.85    0.12
  -4 -10   2   -0.02    0.13
  -4 -10   2    0.08    0.11
   4 -10  -2    0.10    0.07
   4 -10  -2    0.04    0.08
   4 -10  -2    0.30    0.09
  -4 -10   2    0.07    0.05
   4 -10  -2    0.19    0.11
  -4  10   2   -0.11    0.07
   4  10  -2    0.09    0.05
   4  10  -2    0.08    0.08
   4  10  -2    0.06    0.05
   4  10  -2    0.06    0.12
  -4  10   2    0.03    0.06
   4  10  -2    0.13    0.09
   3 -10  -2    0.21    0.09
   3 -10  -2    0.27    0.08
   3 -10  -2    0.15    0.07
   3 -10  -2    0.17    0.10
  -3 -10   2    0.11    0.03
  -3 -10   2    0.21    0.04
   3  10  -2    0.19    0.09
  -3  10   2    0.21    0.07
  -3  10   2    0.21    0.06
   3  10  -2    0.11    0.10
   3  10  -2    0.20    0.09
   2 -10  -2    0.21    0.04
   2 -10  -2    0.27    0.08
   2 -10  -2    0.34    0.11
   2 -10  -2    0.22    0.05
  -2  10   2    0.07    0.11
   2  10  -2    0.18    0.09
   2  10  -2    0.30    0.09
   2  10  -2    0.22    0.09
  -2  10   2    0.22    0.04
   2  10  -2    0.57    0.13
  -2  10   2    0.25    0.05
   2  10  -2    0.20    0.09
   1 -10  -2    0.28    0.10
   1 -10  -2    0.32    0.08
   1  10  -2    0.45    0.10
   1  10  -2    0.29    0.10
   1  10  -2    0.08    0.11
   1  10  -2    0.45    0.09
  -1  10   2    0.26    0.08
  -1  10   2    0.34    0.11
  -1  10   2    0.42    0.12
   0 -10   2    0.15    0.08
   0 -10  -2    0.20    0.09
   0 -10   2    0.21    0.08
   0  10  -2    0.17    0.11
   0  10  -2    0.14    0.10
   0  10   2    0.22    0.09
   0  10   2   -0.03    0.07
   0  10  -2    0.17    0.09
   0  10   2    0.29    0.10
   0  10   2    0.12    0.10
   0  10  -2    0.05    0.07
   1 -10   2    3.82    0.20
  -1 -10  -2    3.93    0.18
   1 -10   2    3.87    0.20
   1  10   2    3.85    0.22
   1  10   2    3.73    0.20
  -1  10  -2    4.04    0.21
  -1  10  -2    3.98    0.22
   1  10   2    3.93    0.21
  -1  10  -2    3.79    0.19
  -1  10  -2    4.11    0.22
   2 -10   2    2.35    0.17
   2 -10   2    2.54    0.16
   2 -10   2    2.53    0.18
   2 -10   2    2.30    0.09
   2 -10   2    2.39    0.10
   2  10   2    2.22    0.18
  -2  10  -2    2.21    0.19
  -2  10  -2    2.39    0.09
   2  10   2    2.40    0.18
   2  10   2    2.47    0.18
   3 -10   2    0.49    0.10
   3 -10   2    0.54    0.07
   3 -10   2    0.57    0.12
  -3 -10  -2    0.53    0.05
   3 -10   2    0.55    0.11
  -3 -10  -2    0.73    0.07
  -3 -10  -2    0.65    0.14
   3  10   2    0.58    0.12
  -3  10  -2    0.55    0.07
   3  10   2    0.57    0.10
   3  10   2    0.53    0.05
   3  10   2    0.69    0.13
   4 -10   2    0.21    0.11
   4 -10   2    0.30    0.08
  -4 -10  -2    0.13    0.11
  -4 -10  -2    0.31    0.14
   4 -10   2    0.31    0.11
  -4 -10  -2    0.31    0.06
   4 -10   2    0.21    0.09
  -4  10  -2    0.28    0.07
   4  10   2    0.20    0.12
  -4  10  -2    0.33    0.08
   4  10   2    0.23    0.10
   4  10   2    0.35    0.07
   4  10   2    0.33    0.06
   5 -10   2    1.40    0.16
  -5 -10  -2    1.60    0.13
  -5 -10  -2    1.36    0.14
  -5 -10  -2    1.40    0.17
   5 -10   2    1.24    0.15
   5 -10   2    1.47    0.14
   5 -10   2    1.55    0.18
  -5 -10  -2    1.39    0.19
   5  10   2    1.49    0.11
  -5  10  -2    1.28    0.15
   5  10   2    1.63    0.14
   5  10   2    1.50    0.18
  -5  10  -2    1.48    0.15
   5  10   2    1.48    0.18
  -6 -10  -2    0.12    0.10
   6 -10   2    0.03    0.12
  -6 -10  -2    0.03    0.16
   6 -10   2    0.08    0.11
  -6 -10  -2    0.13    0.12
   6 -10   2    0.02    0.10
  -6 -10  -2    0.12    0.10
   6 -10   2   -0.09    0.16
   6  10   2    0.01    0.08
  -6  10  -2    0.04    0.11
   6  10   2    0.20    0.11
  -6  10  -2   -0.01    0.11
   6  10   2    0.12    0.12
   6  10   2   -0.18    0.14
   7 -10   2    0.09    0.14
   7 -10   2    0.21    0.13
  -7 -10  -2    0.25    0.19
  -7 -10  -2   -0.04    0.12
   7 -10   2   -0.01    0.14
   7 -10   2    0.20    0.16
  -7 -10  -2    0.32    0.14
  -7 -10  -2    0.11    0.11
   7  10   2    0.10    0.10
  -7  10  -2    0.10    0.14
  -7  10  -2    0.22    0.12
   7  10   2   -0.13    0.17
   8 -10   2    0.20    0.18
  -8 -10  -2    0.11    0.22
   8 -10   2   -0.17    0.16
   8 -10   2    0.18    0.15
  -8 -10  -2    0.10    0.13
  -8 -10  -2   -0.13    0.14
   8  10   2    0.01    0.15
   8  10   2   -0.12    0.17
  -8  10  -2    0.22    0.14
   8  10   2    0.04    0.14
  -9 -10  -2    0.31    0.20
   9 -10   2    0.34    0.21
   9 -10   2    0.10    0.15
  -9 -10  -2    0.07    0.17
   9 -10   2    0.28    0.23
   9  10   2   -0.07    0.19
  -9  10  -2   -0.13    0.21
   9  10   2    0.12    0.19
  -9  10  -2   -0.46    0.18
  10 -10   2    0.22    0.25
  10 -10   2    0.09    0.19
  10 -10   2    0.58    0.34
 -10 -10  -2    0.58    0.23
  10  10   2    0.14    0.22
  10 -11  -2    1.04    0.44
  10 -11  -2    0.33    0.20
 -10 -11   2   -0.07    0.26
  10 -11  -2    0.37    0.28
  -9 -11   2    0.78    0.18
  -9 -11   2   -0.03    0.23
   9 -11  -2   -0.08    0.16
   9 -11  -2   -0.21    0.24
   9 -11  -2    0.43    0.24
   9  11  -2   -0.04    0.17
  -9  11   2    0.20    0.20
  -8 -11   2   -0.41    0.41
   8 -11  -2   -0.06    0.15
   8 -11  -2   -0.04    0.19
  -8 -11   2    0.25    0.20
   8 -11  -2    0.16    0.19
  -8 -11   2   -0.08    0.13
  -8  11   2    0.24    0.19
   8  11  -2   -0.01    0.14
   8  11  -2    0.20    0.16
  -8  11   2    0.15    0.16
   7 -11  -2    0.04    0.14
  -7 -11   2   -0.07    0.22
  -7 -11   2   -0.32    0.12
  -7 -11   2   -0.11    0.19
   7 -11  -2    0.13    0.16
  -7 -11   2   -0.14    0.11
   7 -11  -2    0.22    0.17
  -7  11   2    0.05    0.15
   7  11  -2    0.03    0.08
   7  11  -2   -0.08    0.10
  -7  11   2   -0.06    0.12
  -6 -11   2    0.50    0.20
   6 -11  -2    0.17    0.13
  -6 -11   2    0.53    0.20
   6 -11  -2    0.33    0.13
  -6 -11   2    0.13    0.10
   6 -11  -2    0.21    0.16
  -6 -11   2    0.45    0.10
   6 -11  -2    0.24    0.14
  -6  11   2    0.27    0.13
   6  11  -2    0.38    0.11
   6  11  -2    0.15    0.10
  -6  11   2    0.35    0.13
   6  11  -2    0.21    0.16
   6  11  -2    0.15    0.09
  -5 -11   2    1.42    0.12
  -5 -11   2    1.50    0.13
   5 -11  -2    1.44    0.17
  -5 -11   2    1.53    0.19
   5 -11  -2    1.74    0.19
  -5 -11   2    2.18    0.26
   5 -11  -2    1.86    0.20
   5 -11  -2    1.24    0.16
  -5  11   2    1.45    0.16
   5  11  -2    1.32    0.19
   5  11  -2    1.51    0.11
   5  11  -2    1.33    0.15
   5  11  -2    1.42    0.19
  -5  11   2    1.71    0.16
   4 -11  -2   -0.08    0.14
   4 -11  -2    0.00    0.09
  -4 -11   2   -0.01    0.05
   4 -11  -2   -0.11    0.07
   4 -11  -2   -0.08    0.07
   4  11  -2    0.08    0.10
  -4  11   2   -0.01    0.07
  -4  11   2   -0.09    0.07
   4  11  -2    0.03    0.04
   4  11  -2    0.00    0.04
   4  11  -2   -0.01    0.13
   4  11  -2   -0.22    0.10
   3 -11  -2    0.52    0.07
   3 -11  -2    0.46    0.11
   3 -11  -2    0.36    0.12
   3 -11  -2    0.47    0.10
   3 -11  -2    0.55    0.07
   3  11  -2    0.58    0.14
  -3  11   2    0.46    0.19
   3  11  -2    0.63    0.11
  -3  11   2    0.51    0.07
  -3  11   2    0.51    0.06
   3  11  -2    0.39    0.11
   2 -11  -2    0.02    0.04
   2 -11  -2    0.03    0.11
   2 -11  -2    0.05    0.04
   2 -11  -2    0.17    0.09
  -2  11   2    0.08    0.13
   2  11  -2    0.10    0.10
  -2  11   2    0.01    0.02
   2  11  -2    0.04    0.10
  -2  11   2    0.01    0.03
   2  11  -2   -0.09    0.09
   2  11  -2   -0.04    0.11
   2  11  -2    0.11    0.10
   1 -11  -2    0.06    0.10
   1 -11  -2    0.14    0.08
  -1  11   2    0.08    0.10
   1  11  -2    0.03    0.12
  -1  11   2    0.02    0.10
   1  11  -2    0.05    0.10
  -1  11   2    0.03    0.12
   1  11  -2    0.02    0.09
  -1  11   2    0.03    0.08
   0 -11   2    0.99    0.15
   0 -11  -2    1.18    0.14
   0 -11   2    1.24    0.14
   0  11   2    1.16    0.15
   0  11  -2    1.33    0.16
   0  11   2    1.06    0.15
   0  11   2    1.26    0.16
   0  11  -2    1.44    0.15
   0  11  -2    1.32    0.16
   0  11   2    1.24    0.14
   0  11  -2    1.09    0.15
   1 -11   2    0.11    0.10
   1 -11   2    0.33    0.10
  -1 -11  -2    0.31    0.10
   1  11   2    0.23    0.11
   1  11   2    0.19    0.12
   1  11   2    0.24    0.10
  -1  11  -2    0.24    0.12
  -1  11  -2    0.47    0.10
  -1  11  -2    0.25    0.13
  -1  11  -2    0.12    0.11
   1  11   2    0.12    0.10
   2 -11   2    3.60    0.12
   2 -11   2    3.97    0.23
   2 -11   2    3.45    0.11
   2 -11   2    3.20    0.22
   2  11   2    3.30    0.25
   2  11   2    3.68    0.23
  -2  11  -2    3.36    0.22
   2  11   2    3.67    0.18
   2  11   2    3.38    0.22
   2  11   2    3.69    0.18
  -2  11  -2    3.60    0.23
   3 -11   2    0.05    0.06
  -3 -11  -2    0.05    0.03
  -3 -11  -2   -0.07    0.14
   3 -11   2   -0.05    0.10
  -3 -11  -2    0.04    0.04
   3 -11   2    0.03    0.11
   3 -11   2    0.13    0.06
   3 -11   2    0.02    0.09
  -3  11  -2   -0.01    0.05
   3  11   2   -0.01    0.10
   3  11   2    0.10    0.13
  -3  11  -2    0.13    0.05
   3  11   2    0.19    0.09
   4 -11   2    1.32    0.17
  -4 -11  -2    1.21    0.20
  -4 -11  -2    0.92    0.10
   4 -11   2    1.18    0.16
   4 -11   2    0.98    0.11
   4 -11   2    1.09    0.12
   4  11   2    1.05    0.15
   4  11   2    1.12    0.14
   4  11   2    1.31    0.20
  -4  11  -2    0.86    0.09
  -4  11  -2    0.91    0.12
   4  11   2    1.00    0.09
   5 -11   2    0.58    0.13
   5 -11   2    0.72    0.15
   5 -11   2    0.46    0.11
   5 -11   2    0.70    0.16
  -5 -11  -2    0.59    0.19
  -5 -11  -2    0.53    0.09
  -5  11  -2    0.68    0.11
   5  11   2    0.70    0.16
   5  11   2    0.59    0.15
  -5  11  -2    0.54    0.10
   5  11   2    0.54    0.08
   5  11   2    0.49    0.09
  -6 -11  -2   -0.01    0.13
  -6 -11  -2   -0.14    0.20
   6 -11   2    0.07    0.14
  -6 -11  -2    0.06    0.10
   6 -11   2   -0.14    0.12
   6 -11   2   -0.02    0.12
  -6 -11  -2    0.06    0.10
   6 -11   2   -0.15    0.11
   6  11   2   -0.14    0.15
   6  11   2    0.23    0.14
  -6  11  -2   -0.06    0.11
   6  11   2    0.07    0.08
   6  11   2   -0.13    0.13
  -7 -11  -2    0.79    0.21
  -7 -11  -2    0.52    0.14
   7 -11   2    0.40    0.16
   7 -11   2    0.53    0.18
  -7 -11  -2    0.76    0.13
   7 -11   2    0.30    0.19
   7 -11   2    0.47    0.16
  -7  11  -2    0.39    0.13
   7  11   2    0.37    0.14
   7  11   2    0.52    0.15
  -7  11  -2    0.69    0.16
   7  11   2    0.52    0.12
  -8 -11  -2   -0.14    0.14
   8 -11   2    0.11    0.16
  -8 -11  -2    0.26    0.21
   8 -11   2    0.13    0.19
   8 -11   2   -0.02    0.20
   8  11   2    0.06    0.14
  -8  11  -2   -0.22    0.19
  -8  11  -2    0.06    0.15
   8  11   2   -0.13    0.17
   9 -11   2    0.44    0.20
   9 -11   2    0.70    0.25
  -9 -11  -2    1.00    0.25
   9 -11   2    0.91    0.27
   9  11   2    0.46    0.19
  -9  11  -2    0.79    0.21
   9  11   2    1.42    0.36
  10 -11   2    0.11    0.21
  10 -11   2    0.27    0.27
 -10 -11  -2    0.40    0.27
  10  11   2    0.44    0.16
  -9 -12   2    0.89    0.28
   9 -12  -2    0.19    0.18
   9 -12  -2    0.90    0.27
   9  12  -2    0.42    0.19
  -9  12   2    0.38    0.17
   8 -12  -2    0.02    0.23
   8 -12  -2    0.32    0.20
   8 -12  -2    0.19    0.17
  -8 -12   2    0.13    0.24
  -8  12   2    0.17    0.16
   8  12  -2    0.27    0.16
   7 -12  -2   -0.02    0.14
  -7 -12   2   -0.02    0.12
  -7 -12   2    0.08    0.11
  -7 -12   2    0.08    0.20
   7 -12  -2    0.07    0.17
   7 -12  -2   -0.11    0.18
  -7  12   2   -0.18    0.14
  -7  12   2    0.11    0.13
   7  12  -2   -0.14    0.11
   7  12  -2    0.15    0.15
   6 -12  -2    0.61    0.15
  -6 -12   2    0.34    0.23
   6 -12  -2    0.48    0.15
   6 -12  -2    0.65    0.16
   6 -12  -2    0.48    0.18
  -6 -12   2    0.63    0.23
  -6 -12   2    0.20    0.14
   6  12  -2    0.41    0.10
  -6  12   2    0.44    0.14
   6  12  -2    0.37    0.19
   6  12  -2    0.52    0.09
  -6  12   2    0.32    0.12
  -5 -12   2    1.17    0.12
   5 -12  -2    1.28    0.20
  -5 -12   2    1.29    0.22
   5 -12  -2    1.23    0.14
   5 -12  -2    1.24    0.17
  -5 -12   2    1.06    0.11
  -5 -12   2    1.28    0.22
   5 -12  -2    1.16    0.14
   5  12  -2    0.95    0.19
  -5  12   2    1.62    0.18
   5  12  -2    1.20    0.11
   5  12  -2    1.42    0.15
  -5  12   2    1.21    0.16
   5  12  -2    1.21    0.10
   4 -12  -2    1.34    0.20
  -4 -12   2    1.08    0.06
   4 -12  -2    1.14    0.18
   4 -12  -2    1.03    0.11
   4 -12  -2    1.39    0.15
   4  12  -2    1.52    0.16
  -4  12   2    1.13    0.11
  -4  12   2    0.93    0.12
   4  12  -2    0.88    0.16
   4  12  -2    1.39    0.15
   3 -12  -2    0.71    0.08
   3 -12  -2    0.96    0.16
   3 -12  -2    0.81    0.08
   3 -12  -2    1.23    0.18
   3  12  -2    1.01    0.15
   3  12  -2    0.69    0.13
  -3  12   2    0.85    0.08
   3  12  -2    0.51    0.14
   3  12  -2    0.82    0.17
  -3  12   2    0.70    0.22
   2 -12  -2    0.06    0.10
   2 -12  -2    0.13    0.03
   2 -12  -2    0.10    0.20
   2  12  -2    0.06    0.15
   2  12  -2    0.07    0.12
  -2  12   2    0.27    0.17
   2  12  -2    0.09    0.11
   2  12  -2   -0.08    0.11
   2  12  -2    0.04    0.14
   1 -12  -2    0.42    0.12
   1 -12  -2    0.34    0.11
  -1  12   2    0.30    0.19
  -1  12   2    0.40    0.14
   1  12  -2    0.37    0.13
   1  12  -2    0.24    0.16
   1  12  -2    0.36    0.12
  -1  12   2    0.19    0.15
  -1  12   2    0.15    0.11
   1  12  -2    0.37    0.15
   0 -12   2   -0.18    0.09
   0 -12  -2   -0.03    0.10
   0  12   2    0.18    0.20
   0  12   2    0.06    0.13
   0  12   2    0.11    0.11
   0  12  -2   -0.04    0.12
   0  12  -2   -0.01    0.14
   0  12   2    0.16    0.11
   0  12  -2   -0.07    0.14
   0  12  -2    0.27    0.11
   1 -12   2   -0.01    0.11
   1 -12   2    0.02    0.09
  -1  12  -2   -0.02    0.13
  -1  12  -2    0.17    0.14
   1  12   2   -0.11    0.14
   1  12   2    0.02    0.10
   1  12   2    0.19    0.18
   1  12   2    0.03    0.11
  -1  12  -2   -0.09    0.19
   2 -12   2    0.18    0.20
   2 -12   2    0.38    0.10
  -2  12  -2    0.32    0.15
   2  12   2    0.22    0.10
   2  12   2    0.37    0.11
  -2  12  -2    0.63    0.20
   2  12   2    0.28    0.18
   2  12   2    0.33    0.15
   2  12   2    0.39    0.13
  -2  12  -2    0.32    0.15
   3 -12   2    0.33    0.13
   3 -12   2    0.34    0.12
   3 -12   2    0.11    0.07
   3 -12   2    0.12    0.06
   3 -12   2    0.13    0.10
   3  12   2    0.37    0.11
   3  12   2    0.26    0.13
  -3  12  -2    0.22    0.05
   3  12   2    0.04    0.15
   4 -12   2    1.13    0.17
   4 -12   2    1.10    0.13
  -4 -12  -2    1.32    0.23
   4 -12   2    1.29    0.21
   4 -12   2    1.37    0.18
  -4 -12  -2    1.17    0.09
  -4 -12  -2    1.14    0.08
   4  12   2    1.17    0.07
   4  12   2    1.17    0.19
   4  12   2    1.12    0.07
  -4  12  -2    0.97    0.11
   4  12   2    1.38    0.21
   4  12   2    1.31    0.16
  -4  12  -2    1.16    0.12
   5 -12   2    1.12    0.19
   5 -12   2    0.95    0.16
   5 -12   2    1.30    0.13
   5 -12   2    1.01    0.14
  -5 -12  -2    1.13    0.13
   5  12   2    1.07    0.14
  -5  12  -2    0.98    0.12
  -5  12  -2    1.26    0.14
   5  12   2    1.18    0.17
   5  12   2    1.07    0.20
   5  12   2    1.29    0.13
  -6 -12  -2    0.11    0.14
  -6 -12  -2    0.00    0.10
   6 -12   2   -0.23    0.12
   6 -12   2    0.00    0.14
   6 -12   2   -0.05    0.14
   6 -12   2    0.10    0.17
  -6  12  -2    0.07    0.12
  -6  12  -2   -0.01    0.12
   6  12   2    0.01    0.14
   6  12   2    0.17    0.12
   6  12   2   -0.06    0.08
   7 -12   2    0.09    0.27
   7 -12   2    0.06    0.17
  -7 -12  -2    0.12    0.14
  -7 -12  -2    0.04    0.24
   7 -12   2   -0.04    0.14
  -7 -12  -2    0.08    0.20
   7  12   2    0.06    0.16
   7  12   2    0.09    0.10
  -7  12  -2    0.12    0.15
  -7  12  -2    0.34    0.14
   7  12   2    0.02    0.10
   8 -12   2    0.26    0.22
   8 -12   2    0.30    0.22
   8 -12   2    0.03    0.17
  -8 -12  -2   -0.18    0.23
   8  12   2    0.37    0.18
  -8  12  -2    0.22    0.15
   9 -12   2   -0.49    0.26
   9 -12   2   -0.15    0.20
  -9 -12  -2    0.71    0.26
   9  12   2    0.16    0.22
   9 -13  -2   -0.29    0.28
   9 -13  -2    0.60    0.28
  -9 -13   2    0.32    0.32
   9  13  -2    0.71    0.22
   8 -13  -2    0.37    0.26
   8 -13  -2   -0.13    0.17
  -8 -13   2   -0.13    0.28
   8  13  -2   -0.13    0.16
  -8  13   2    0.02    0.18
   7 -13  -2    0.22    0.17
   7 -13  -2   -0.05    0.18
   7 -13  -2    0.04    0.22
  -7 -13   2    0.60    0.23
  -7 -13   2    0.29    0.15
   7  13  -2    0.08    0.17
  -7  13   2   -0.09    0.14
   7  13  -2    0.14    0.11
   6 -13  -2   -0.13    0.15
  -6 -13   2   -0.04    0.09
   6 -13  -2   -0.03    0.19
   6 -13  -2   -0.05    0.14
   6 -13  -2   -0.12    0.15
  -6 -13   2    0.16    0.10
  -6  13   2    0.13    0.12
  -6  13   2    0.01    0.11
   6  13  -2    0.04    0.08
   6  13  -2    0.02    0.08
   5 -13  -2    0.04    0.11
   5 -13  -2   -0.01    0.12
   5 -13  -2    0.22    0.15
   5 -13  -2    0.06    0.15
  -5 -13   2   -0.05    0.06
   5 -13  -2   -0.03    0.18
  -5 -13   2    0.09    0.05
  -5  13   2    0.03    0.11
  -5  13   2   -0.05    0.11
   4 -13  -2    1.63    0.21
   4 -13  -2    1.35    0.13
   4 -13  -2    1.63    0.21
   4 -13  -2    1.48    0.12
   4 -13  -2    1.35    0.22
  -4  13   2    1.53    0.23
   4  13  -2    1.46    0.17
  -4  13   2    1.48    0.11
   4  13  -2    1.31    0.20
  -4  13   2    1.65    0.13
   3 -13  -2    0.04    0.06
   3 -13  -2    0.08    0.14
   3 -13  -2    0.00    0.06
   3 -13  -2    0.01    0.14
   3  13  -2    0.19    0.15
  -3  13   2    0.04    0.18
   3  13  -2   -0.05    0.15
  -3  13   2    0.01    0.05
  -3  13   2    0.01    0.04
   3  13  -2   -0.15    0.13
   2 -13  -2    2.57    0.22
   2 -13  -2    2.84    0.25
   2  13  -2    2.50    0.25
  -2  13   2    2.61    0.30
   2  13  -2    3.01    0.25
   2  13  -2    2.97    0.16
   2  13  -2    2.36    0.22
   1 -13  -2    0.49    0.14
  -1  13   2    0.60    0.19
  -1  13   2    0.37    0.13
   1  13  -2    0.37    0.18
  -1  13   2    0.55    0.16
  -1  13   2    0.41    0.09
   1  13  -2    0.32    0.13
   1  13  -2    0.30    0.15
   1  13  -2    0.51    0.09
   0 -13  -2    0.74    0.16
   0 -13   2    0.90    0.15
   0  13  -2    0.54    0.18
   0  13   2    1.00    0.17
   0  13   2    1.07    0.17
   0  13  -2    0.83    0.17
   0  13  -2    0.82    0.10
   0  13  -2    1.00    0.17
   0  13   2    1.31    0.15
   1 -13   2    0.35    0.12
   1 -13   2    0.35    0.13
  -1  13  -2    0.15    0.08
   1  13   2    0.39    0.14
   1  13   2    0.18    0.13
   1  13   2    0.19    0.10
  -1  13  -2    0.10    0.16
   2 -13   2    0.39    0.15
   2 -13   2    0.60    0.15
   2  13   2    0.33    0.10
   2  13   2    0.63    0.14
  -2  13  -2    0.40    0.08
   2  13   2    0.35    0.13
  -2  13  -2    0.50    0.19
  -2  13  -2    0.36    0.18
   3 -13   2    0.00    0.05
   3 -13   2    0.00    0.14
   3 -13   2   -0.12    0.12
   3 -13   2    0.01    0.06
   3  13   2    0.19    0.12
   3  13   2    0.16    0.13
   3  13   2    0.04    0.14
   3  13   2    0.19    0.12
  -3  13  -2   -0.13    0.16
   4 -13   2    0.08    0.08
   4 -13   2   -0.12    0.13
   4 -13   2    0.14    0.15
   4 -13   2   -0.11    0.10
   4 -13   2   -0.13    0.14
   4  13   2    0.20    0.12
   4  13   2    0.26    0.10
  -4  13  -2    0.06    0.07
  -4  13  -2    0.10    0.07
   5 -13   2    0.33    0.18
   5 -13   2    0.11    0.12
   5 -13   2    0.04    0.15
  -5 -13  -2    0.08    0.06
  -5 -13  -2    0.33    0.07
   5 -13   2    0.03    0.11
   5 -13   2    0.32    0.18
  -5  13  -2    0.17    0.12
  -5  13  -2    0.20    0.10
   5  13   2    0.07    0.06
   5  13   2    0.35    0.10
   5  13   2    0.16    0.06
   6 -13   2   -0.01    0.15
   6 -13   2   -0.06    0.15
   6 -13   2    0.26    0.20
  -6 -13  -2   -0.01    0.11
   6 -13   2   -0.15    0.16
  -6  13  -2   -0.01    0.12
   6  13   2    0.23    0.13
   6  13   2    0.25    0.25
  -6  13  -2   -0.08    0.12
   7 -13   2    0.24    0.18
   7 -13   2    0.13    0.21
   7 -13   2    0.48    0.19
  -7 -13  -2    0.49    0.16
   7  13   2    0.27    0.16
  -7  13  -2    0.12    0.15
   8 -13   2   -0.21    0.19
  -8 -13  -2   -0.26    0.24
   8 -13   2    0.33    0.25
  -8  13  -2   -0.43    0.18
   8  13   2   -0.19    0.17
   9 -13   2    0.13    0.29
   8 -14  -2   -0.01    0.27
  -8 -14   2   -0.22    0.28
   8 -14  -2   -0.25    0.23
   8  14  -2   -0.11    0.17
  -8  14   2    0.31    0.19
   7 -14  -2   -0.13    0.19
   7 -14  -2    0.16    0.25
   7  14  -2   -0.01    0.15
  -7  14   2    0.16    0.14
   6 -14  -2    0.04    0.23
   6 -14  -2    0.25    0.18
   6 -14  -2    0.02    0.20
   6 -14  -2   -0.10    0.16
  -6  14   2   -0.17    0.11
   5 -14  -2    0.09    0.17
   5 -14  -2    0.00    0.12
   5 -14  -2   -0.10    0.20
   5 -14  -2    0.39    0.18
  -5  14   2    0.34    0.11
  -5  14   2    0.17    0.10
  -5  14   2   -0.22    0.23
   4 -14  -2    0.02    0.19
   4 -14  -2    0.20    0.09
   4 -14  -2    0.07    0.08
   4 -14  -2    0.02    0.15
   4  14  -2   -0.13    0.20
  -4  14   2    0.06    0.06
  -4  14   2    0.14    0.23
  -4  14   2    0.01    0.07
   4  14  -2   -0.10    0.16
   3 -14  -2    0.03    0.17
   3 -14  -2   -0.07    0.13
   3  14  -2    0.04    0.16
  -3  14   2    0.35    0.22
   3  14  -2   -0.17    0.22
   2 -14  -2    0.12    0.13
   2 -14  -2    0.01    0.16
  -2  14   2   -0.03    0.18
   2  14  -2   -0.01    0.16
   2  14  -2   -0.01    0.18
  -2  14   2    0.16    0.18
   1 -14  -2    0.46    0.16
   1  14  -2    0.43    0.17
   1  14  -2    0.48    0.17
   1  14  -2    0.31    0.17
  -1  14   2    0.12    0.18
   1  14  -2    0.42    0.27
  -1  14   2    0.20    0.17
  -1  14   2    0.33    0.14
   0 -14  -2    0.32    0.15
   0  14   2   -0.06    0.16
   0  14  -2    0.11    0.17
   0  14   2    0.18    0.17
   0  14   2    0.02    0.20
   0  14  -2   -0.07    0.19
   0  14  -2   -0.07    0.16
   0  14  -2    0.35    0.34
   0  14   2   -0.03    0.12
   1 -14   2    0.10    0.13
   1 -14   2    0.43    0.15
  -1  14  -2    0.40    0.18
   1  14   2    0.18    0.15
   1  14   2    0.60    0.15
   1  14   2    0.54    0.18
  -1  14  -2    0.37    0.18
   1  14   2    0.07    0.20
   2 -14   2    0.02    0.13
   2 -14   2    0.26    0.16
   2  14   2    0.19    0.15
   2  14   2   -0.18    0.14
  -2  14  -2   -0.03    0.19
   2  14   2   -0.29    0.20
   3 -14   2    0.30    0.15
   3 -14   2    0.15    0.17
   3  14   2   -0.18    0.23
   3  14   2    0.11    0.14
  -3  14  -2    0.12    0.22
   3  14   2   -0.03    0.13
   4 -14   2    0.16    0.21
   4 -14   2    0.11    0.09
   4 -14   2    0.29    0.16
   4 -14   2    0.02    0.09
  -4  14  -2   -0.04    0.06
  -4  14  -2    0.12    0.05
   4  14   2    0.16    0.17
   4  14   2    0.15    0.14
  -4  14  -2    0.19    0.27
   5 -14   2    0.52    0.21
   5 -14   2    0.18    0.18
   5 -14   2    0.22    0.20
   5 -14   2    0.21    0.12
  -5  14  -2    0.23    0.11
  -5  14  -2    0.05    0.10
   6 -14   2   -0.08    0.16
  -6 -14  -2   -0.14    0.07
   6 -14   2   -0.39    0.17
   6 -14   2   -0.13    0.25
   6 -14   2    0.09    0.22
   6  14   2    0.02    0.08
  -6  14  -2    0.01    0.12
   6  14   2    0.02    0.08
   7 -14   2    0.08    0.26
   7 -14   2    0.18    0.20
   7  14   2    0.02    0.14
  -7  14  -2    0.04    0.15
   8 -14   2    0.51    0.29
   8 -14   2    0.48    0.24
  -8  14  -2    0.22    0.19
   8  14   2    0.39    0.20
   7 -15  -2    0.05    0.33
   7 -15  -2    0.86    0.25
  -7  15   2   -0.36    0.15
   6 -15  -2    0.25    0.24
   6 -15  -2    0.00    0.24
  -6  15   2    0.07    0.12
  -6  15   2    0.25    0.16
   5 -15  -2   -0.09    0.12
   5 -15  -2    0.25    0.23
   5 -15  -2   -0.10    0.18
  -5  15   2    0.01    0.24
   5  15  -2   -0.08    0.24
   4 -15  -2    0.45    0.08
   4 -15  -2    0.37    0.08
   4 -15  -2    0.67    0.18
   4 -15  -2    0.15    0.21
   4  15  -2    0.58    0.25
  -4  15   2    0.26    0.25
   3 -15  -2    0.15    0.16
   3 -15  -2    0.03    0.20
  -3  15   2    0.20    0.23
   3  15  -2    0.71    0.20
   2 -15  -2   -0.05    0.17
   2  15  -2    0.31    0.21
   2  15  -2    0.41    0.22
  -2  15   2    0.18    0.23
  -2  15   2    0.18    0.23
   1 -15  -2   -0.29    0.17
   1  15  -2    0.32    0.21
  -1  15   2    0.02    0.20
   1  15  -2   -0.29    0.22
  -1  15   2    0.18    0.23
   0  15  -2    0.37    0.22
   0  15   2    0.50    0.20
   0  15   2    0.40    0.20
   0  15  -2    0.18    0.22
   1 -15   2    0.24    0.16
  -1  15  -2    0.22    0.24
   1  15   2   -0.02    0.17
   1  15   2   -0.04    0.18
   2 -15   2    0.07    0.17
   2 -15   2    0.11    0.15
   2  15   2   -0.02    0.17
  -2  15  -2   -0.33    0.27
   3 -15   2   -0.03    0.18
   3 -15   2    0.00    0.16
   3  15   2   -0.15    0.17
  -3  15  -2   -0.18    0.24
   4 -15   2   -0.13    0.21
   4 -15   2   -0.07    0.07
   4 -15   2    0.01    0.09
   4 -15   2    0.14    0.18
   4  15   2   -0.07    0.27
  -4  15  -2   -0.05    0.25
   4  15   2    0.13    0.17
   5 -15   2    0.03    0.12
   5 -15   2    0.26    0.18
   5 -15   2   -0.06    0.23
  -5  15  -2    0.19    0.11
  -5  15  -2   -0.32    0.23
   6 -15   2    0.74    0.30
   6 -15   2    0.21    0.20
   6 -15   2    0.17    0.24
  -6  15  -2    0.20    0.13
   7 -15   2   -0.33    0.23
   7 -15   2    0.28    0.30
  -7  15  -2    0.22    0.17
   6 -16  -2   -0.04    0.33
   6 -16  -2   -0.32    0.23
   6  16  -2    0.91    0.30
  -6  16   2   -0.20    0.31
  -6  16   2    0.42    0.12
   5 -16  -2    0.00    0.20
   5 -16  -2   -0.23    0.26
   5  16  -2   -0.22    0.26
   4 -16  -2   -0.03    0.23
   4 -16  -2    0.26    0.18
  -4  16   2    0.30    0.20
   3 -16  -2    0.31    0.18
   3 -16  -2    0.50    0.22
  -3  16   2    0.56    0.29
   2 -16  -2    0.40    0.22
   2  16  -2    0.33    0.24
  -2  16   2    0.03    0.25
   1 -16  -2    0.16    0.18
   1  16  -2    0.00    0.24
  -1  16   2    0.05    0.25
   0  16  -2    0.15    0.22
   0  16   2   -0.08    0.20
   1  16   2    0.00    0.22
  -1  16  -2    0.05    0.24
   1  16   2    0.31    0.22
   2 -16   2    0.08    0.16
   2 -16   2   -0.13    0.19
  -2  16  -2   -0.02    0.27
   3 -16   2    0.08    0.20
   3 -16   2   -0.26    0.22
  -3  16  -2    0.24    0.27
   4 -16   2    0.92    0.24
   4 -16   2    0.19    0.24
   4  16   2    0.58    0.21
  -4  16  -2    0.24    0.20
   5 -16   2    0.36    0.23
   5 -16   2    0.48    0.29
   5  16   2    0.35    0.26
   6 -16   2    0.44    0.25
  -6  16  -2   -0.74    0.34
  -6  16  -2   -0.23    0.12
   4 -17  -2    0.71    0.24
   4 -17  -2    0.09    0.32
  -4  17   2    0.04    0.22
   3 -17  -2   -0.05    0.24
  -3  17   2    0.29    0.15
   2 -17  -2    0.06    0.22
  -2  17   2   -0.08    0.17
   1  17  -2   -0.08    0.26
  -1  17   2   -0.41    0.17
   0  17   2   -0.10    0.21
   0  17  -2   -0.35    0.27
   1  17   2    0.39    0.21
  -1  17  -2   -0.18    0.24
   3 -17   2    0.37    0.25
   3 -17   2    0.31    0.26
   4 -17   2   -0.08    0.23
   4 -17   2   -0.26    0.44
  -4  17  -2   -0.42    0.25
   1  18  -2    0.48    0.13
  -1  18   2   -0.43    0.30
   0  18  -2   -0.18    0.14
   0  18   2   -0.30    0.22
  -1  18  -2    0.24    0.17
  13   0  -3    0.99    0.37
  12   0  -3    0.19    0.26
 -12   0   3    0.25    0.24
 -11   0   3    0.13    0.21
  11   0  -3   -0.03    0.22
  10   0  -3   -0.13    0.17
 -10   0   3    0.30    0.18
 -10   0   3   -0.16    0.15
  10   0  -3    0.06    0.17
  -9   0   3    0.14    0.16
   9   0  -3    0.00    0.15
   9   0  -3    0.11    0.16
  -9   0   3   -0.09    0.14
  -8   0   3    0.14    0.09
  -8   0   3   -0.08    0.10
   8   0  -3    0.01    0.09
   8   0  -3    0.14    0.10
  -7   0   3    0.10    0.09
   7   0  -3   -0.11    0.09
  -7   0   3    0.01    0.08
   7   0  -3   -0.01    0.08
  -6   0   3   -0.01    0.09
  -6   0   3   -0.12    0.05
   6   0  -3   -0.05    0.07
   6   0  -3    0.00    0.07
  -5   0   3   -0.06    0.04
   5   0  -3   -0.10    0.05
   5   0  -3   -0.05    0.05
  -5   0   3   -0.03    0.06
   4   0  -3   -0.04    0.04
  -4   0   3   -0.04    0.04
   4   0  -3    0.00    0.05
  -4   0   3   -0.09    0.04
  -3   0   3   -0.01    0.03
  -3   0   3    0.06    0.04
   3   0  -3   -0.02    0.04
   3   0  -3   -0.03    0.03
  -2   0   3    0.00    0.03
  -2   0   3   -0.01    0.03
   2   0  -3    0.01    0.03
   2   0  -3   -0.03    0.03
   1   0  -3    0.00    0.01
   1   0  -3    0.00    0.01
  -1   0   3   -0.01    0.01
  -1   0   3    0.00    0.01
   0   0  -3    0.00    0.01
   0   0  -3    0.01    0.01
   0   0   3    0.01    0.01
   0   0   3    0.01    0.01
   0   0   3    0.02    0.01
  -1   0  -3    0.00    0.02
   1   0   3    0.00    0.02
  -1   0  -3   -0.03    0.01
   1   0   3    0.00    0.01
   2   0   3   -0.01    0.02
  -2   0  -3   -0.03    0.02
  -2   0  -3    0.00    0.02
   2   0   3    0.00    0.03
  -3   0  -3   -0.03    0.03
   3   0   3   -0.08    0.03
   3   0   3   -0.02    0.03
  -3   0  -3   -0.04    0.03
  -4   0  -3   -0.04    0.04
  -4   0  -3    0.06    0.04
   4   0   3    0.03    0.04
   4   0   3    0.03    0.04
  -5   0  -3   -0.02    0.05
   5   0   3   -0.05    0.05
   5   0   3   -0.07    0.05
  -5   0  -3    0.01    0.06
   6   0   3   -0.01    0.07
  -6   0  -3   -0.12    0.08
   6   0   3   -0.07    0.07
  -6   0  -3   -0.04    0.07
   7   0   3   -0.08    0.08
   7   0   3   -0.07    0.08
  -7   0  -3   -0.03    0.08
  -7   0  -3    0.08    0.08
  -8   0  -3    0.03    0.11
  -8   0  -3    0.06    0.10
   8   0   3   -0.04    0.12
   8   0   3   -0.19    0.10
  -9   0  -3   -0.17    0.15
   9   0   3    0.02    0.17
   9   0   3   -0.35    0.14
  -9   0  -3    0.07    0.17
 -10   0  -3   -0.35    0.15
  10   0   3    0.07    0.18
  10   0   3   -0.11    0.17
 -11   0  -3   -0.21    0.20
  11   0   3   -0.03    0.24
  12   0   3   -0.45    0.20
 -12   0  -3   -0.07    0.27
  13  -1  -3   -0.68    0.28
 -13  -1   3   -0.58    0.20
  13   1  -3    0.35    0.34
 -12  -1   3    0.11    0.22
  12  -1  -3    0.26    0.27
 -12   1   3    0.18    0.24
  12   1  -3    0.08    0.24
  11  -1  -3    0.07    0.26
 -11  -1   3    0.18    0.20
  11   1  -3   -0.09    0.22
 -11   1   3    0.10    0.19
 -10  -1   3    1.05    0.33
  10  -1  -3    0.69    0.20
  10  -1  -3    0.69    0.19
 -10   1   3    1.50    0.21
  10   1  -3    1.12    0.21
  10   1  -3    1.44    0.22
 -10   1   3    1.07    0.19
  -9  -1   3    0.11    0.13
   9  -1  -3    0.00    0.12
   9  -1  -3   -0.09    0.20
  -9  -1   3   -0.09    0.12
  -9   1   3    0.18    0.16
  -9   1   3   -0.06    0.13
   9   1  -3    0.09    0.16
   9   1  -3    0.00    0.14
   8  -1  -3    0.04    0.11
   8  -1  -3    0.01    0.11
  -8  -1   3   -0.07    0.10
  -8  -1   3    0.09    0.10
  -8   1   3    0.01    0.11
   8   1  -3    0.11    0.12
  -8   1   3    0.08    0.11
   8   1  -3   -0.06    0.10
   7  -1  -3    0.59    0.10
   7  -1  -3    0.65    0.11
  -7  -1   3    0.56    0.10
  -7  -1   3    0.58    0.11
   7   1  -3    0.43    0.11
  -7   1   3    0.57    0.11
   7   1  -3    0.56    0.11
  -7   1   3    0.58    0.11
   6  -1  -3    7.44    0.26
   6  -1  -3    8.16    0.28
  -6  -1   3    7.86    0.26
  -6  -1   3    7.46    0.27
   6   1  -3    7.65    0.26
  -6   1   3    8.04    0.28
   6   1  -3    7.85    0.27
  -6   1   3    7.56    0.26
  -5  -1   3    0.08    0.05
  -5  -1   3   -0.01    0.06
   5  -1  -3    0.05    0.06
   5  -1  -3    0.10    0.05
   5   1  -3    0.09    0.05
  -5   1   3    0.05    0.06
  -5   1   3   -0.05    0.05
   5   1  -3    0.03    0.06
   4  -1  -3    4.86    0.17
  -4  -1   3    4.60    0.16
   4  -1  -3    4.75    0.17
  -4  -1   3    4.91    0.17
   4   1  -3    4.95    0.17
   4   1  -3    4.67    0.17
  -4   1   3    4.85    0.17
  -4   1   3    4.81    0.17
   3  -1  -3    8.14    0.23
  -3  -1   3    8.29    0.23
  -3  -1   3    8.61    0.24
   3  -1  -3    8.42    0.23
   3   1  -3    8.66    0.23
  -3   1   3    8.28    0.23
   3   1  -3    8.27    0.23
  -3   1   3    8.45    0.23
  -2  -1   3   96.88    2.07
   2  -1  -3   88.25    2.01
   2  -1  -3   87.67    2.01
   2   1  -3   87.14    2.01
   2   1  -3   86.53    2.01
  -2   1   3   96.37    2.05
  -2   1   3   87.54    2.01
  -1  -1   3    1.15    0.05
   1  -1  -3    1.25    0.05
   1  -1  -3    1.18    0.05
  -1  -1   3    1.16    0.05
  -1  -1   3    1.21    0.03
  -1  -1   3    1.15    0.05
  -1   1   3    1.23    0.05
   1   1  -3    1.12    0.05
   1   1  -3    1.18    0.05
   0  -1   3   11.50    0.27
   0  -1   3   11.28    0.27
   0  -1  -3   11.35    0.27
   0  -1   3   10.97    0.26
   0  -1  -3   11.20    0.26
   0  -1   3   11.39    0.26
   0  -1  -3   11.35    0.26
   0   1   3   11.28    0.26
   0   1  -3   11.30    0.26
   0   1  -3   11.39    0.26
   0   1  -3   11.43    0.26
   0   1   3   11.38    0.27
  -1  -1  -3   93.57    2.11
  -1  -1  -3   93.21    2.06
   1  -1   3   94.76    2.08
  -1  -1  -3   97.30    2.12
   1  -1   3   96.50    2.13
   1  -1   3   91.19    2.08
   1   1   3   89.51    2.08
  -1   1  -3   94.70    2.10
   1   1   3   84.48    2.12
  -1   1  -3   83.05    2.13
  -1   1  -3   95.02    2.09
   1   1   3   92.36    2.06
  -2  -1  -3    4.00    0.12
   2  -1   3    3.65    0.12
   2  -1   3    3.82    0.12
  -2  -1  -3    3.80    0.12
  -2   1  -3    3.81    0.12
   2   1   3    3.72    0.12
  -2   1  -3    3.75    0.12
   2   1   3    3.71    0.11
   3  -1   3    3.61    0.13
  -3  -1  -3    3.68    0.13
   3  -1   3    3.85    0.13
  -3  -1  -3    3.57    0.12
  -3   1  -3    3.74    0.13
   3   1   3    3.77    0.13
   3   1   3    3.54    0.12
  -3   1  -3    3.72    0.13
  -4  -1  -3   -0.06    0.04
  -4  -1  -3    0.02    0.04
   4  -1   3   -0.02    0.04
   4  -1   3   -0.02    0.04
   4   1   3    0.02    0.05
  -4   1  -3    0.09    0.04
   4   1   3    0.02    0.05
  -4   1  -3    0.04    0.05
   5  -1   3    1.09    0.10
  -5  -1  -3    1.13    0.11
   5  -1   3    1.06    0.10
  -5  -1  -3    1.08    0.12
   5   1   3    1.03    0.10
  -5   1  -3    1.12    0.11
   5   1   3    1.14    0.10
  -5   1  -3    1.27    0.11
   6  -1   3    0.83    0.12
  -6  -1  -3    1.03    0.11
   6  -1   3    1.16    0.14
  -6  -1  -3    0.91    0.11
  -6   1  -3    1.14    0.14
   6   1   3    1.05    0.12
  -6   1  -3    1.03    0.12
   6   1   3    1.14    0.12
   7  -1   3    2.01    0.18
   7  -1   3    2.05    0.19
  -7  -1  -3    2.67    0.17
  -7  -1  -3    2.11    0.17
  -7   1  -3    2.49    0.17
  -7   1  -3    2.39    0.16
   7   1   3    2.12    0.17
   7   1   3    2.34    0.17
  -8  -1  -3    1.55    0.16
   8  -1   3    1.41    0.17
  -8  -1  -3    1.25    0.15
   8  -1   3    1.52    0.20
   8   1   3    1.48    0.18
   8   1   3    1.37    0.17
  -8   1  -3    1.20    0.17
  -8   1  -3    1.57    0.17
   9  -1   3    0.25    0.14
  -9  -1  -3    0.22    0.14
   9  -1   3    0.59    0.20
  -9  -1  -3    0.74    0.19
   9   1   3    0.27    0.15
  -9   1  -3    0.37    0.15
  -9   1  -3    0.59    0.18
   9   1   3    0.26    0.16
 -10  -1  -3    1.08    0.20
  10  -1   3    0.92    0.19
 -10  -1  -3    1.23    0.20
  10  -1   3    1.22    0.22
  10   1   3    1.08    0.21
  10   1   3    1.33    0.22
 -10   1  -3    1.20    0.20
 -10   1  -3    1.44    0.22
 -11  -1  -3   -0.14    0.22
  11  -1   3    0.04    0.22
  11   1   3   -0.03    0.20
 -11   1  -3    0.31    0.20
 -12  -1  -3    0.69    0.30
  12  -1   3    0.46    0.42
 -12   1  -3    0.28    0.24
  12   1   3   -0.10    0.18
  12  -2  -3    0.19    0.30
 -12  -2   3    0.16    0.27
  12   2  -3    0.30    0.15
 -12   2   3   -0.21    0.22
 -11  -2   3    0.23    0.19
  11  -2  -3    0.20    0.23
  11   2  -3   -0.15    0.24
  11   2  -3    0.25    0.21
 -11   2   3    0.36    0.21
  10  -2  -3    0.03    0.17
 -10  -2   3   -0.08    0.19
 -10  -2   3   -0.01    0.16
  10  -2  -3    0.02    0.19
 -10   2   3    0.17    0.18
 -10   2   3    0.07    0.16
  10   2  -3   -0.11    0.15
  10   2  -3    0.09    0.17
   9  -2  -3    0.24    0.19
  -9  -2   3    0.25    0.12
  -9  -2   3    0.16    0.13
   9  -2  -3    0.19    0.14
   9   2  -3    0.04    0.13
   9   2  -3    0.38    0.24
  -9   2   3    0.21    0.16
  -9   2   3    0.17    0.15
   8  -2  -3    2.84    0.20
  -8  -2   3    2.85    0.21
  -8  -2   3    2.20    0.19
   8  -2  -3    2.76    0.21
   8   2  -3    2.81    0.22
   8   2  -3    2.66    0.20
  -8   2   3    2.98    0.21
  -8   2   3    2.35    0.20
  -7  -2   3    0.30    0.10
   7  -2  -3    0.21    0.10
   7  -2  -3    0.16    0.09
  -7  -2   3    0.31    0.08
  -7   2   3    0.29    0.09
   7   2  -3    0.25    0.10
   7   2  -3    0.21    0.10
  -7   2   3    0.17    0.10
  -6  -2   3    0.22    0.07
  -6  -2   3    0.21    0.07
   6  -2  -3    0.32    0.09
   6  -2  -3    0.20    0.09
   6   2  -3    0.09    0.07
   6   2  -3    0.12    0.07
  -6   2   3    0.22    0.08
  -6   2   3    0.16    0.08
   5  -2  -3    9.14    0.28
  -5  -2   3    9.01    0.28
   5  -2  -3    8.70    0.28
  -5  -2   3    9.49    0.28
   5   2  -3    9.05    0.28
   5   2  -3    9.06    0.28
  -5   2   3    8.99    0.28
  -5   2   3    8.79    0.27
   4  -2  -3   24.75    0.61
  -4  -2   3   24.53    0.60
  -4  -2   3   25.11    0.60
   4  -2  -3   23.84    0.60
  -4   2   3   25.28    0.61
   4   2  -3   24.56    0.60
  -4   2   3   24.09    0.60
   4   2  -3   24.84    0.60
   3  -2  -3   21.57    0.53
   3  -2  -3   22.41    0.53
  -3  -2   3   21.33    0.52
  -3  -2   3   22.32    0.52
   3   2  -3   21.39    0.52
  -3   2   3   22.04    0.53
   3   2  -3   21.39    0.52
  -3   2   3   21.45    0.53
  -2  -2   3   24.62    0.57
  -2  -2   3   23.18    0.56
  -2  -2   3   24.20    0.57
   2  -2  -3   24.75    0.57
   2   2  -3   24.14    0.57
   2   2  -3   24.38    0.57
  -2   2   3   24.58    0.57
  -2   2   3   24.60    0.57
  -1  -2   3   77.04    1.83
  -1  -2   3   76.78    1.84
   1  -2  -3   87.43    1.87
   1  -2  -3   83.46    1.86
  -1  -2   3   81.50    1.85
   1  -2  -3   82.19    1.86
   1   2  -3   80.18    1.85
   1   2  -3   81.48    1.83
  -1   2   3   80.10    1.84
   1   2  -3   74.83    1.81
  -1   2   3   82.69    1.86
   1   2  -3   82.59    1.89
   1   2  -3   85.17    1.86
  -1   2   3   85.96    1.88
   0  -2  -3    0.75    0.03
   0  -2   3    0.71    0.03
   0  -2  -3    0.70    0.04
   0  -2   3    0.68    0.03
   0  -2   3    0.67    0.04
   0  -2   3    0.73    0.04
   0  -2  -3    0.71    0.03
   0  -2   3    0.75    0.04
   0   2  -3    0.72    0.04
   0   2  -3    0.73    0.03
   0   2  -3    0.71    0.04
   0   2   3    0.72    0.04
   0   2  -3    0.76    0.04
   0   2   3    0.74    0.04
   1  -2   3    0.47    0.03
  -1  -2  -3    0.41    0.03
  -1  -2  -3    0.45    0.03
  -1  -2  -3    0.42    0.03
   1  -2   3    0.37    0.03
  -1  -2  -3    0.41    0.02
   1  -2   3    0.42    0.04
  -1   2  -3    0.47    0.03
   1   2   3    0.44    0.03
  -1   2  -3    0.41    0.03
  -1   2  -3    0.41    0.03
   1   2   3    0.47    0.03
   1   2   3    0.39    0.03
   2  -2   3   17.89    0.41
   2  -2   3   16.02    0.43
  -2  -2  -3   17.36    0.42
   2  -2   3   17.83    0.42
   2   2   3   17.54    0.42
   2   2   3   17.78    0.42
  -2   2  -3   18.05    0.42
  -2   2  -3   17.82    0.42
   3  -2   3    0.60    0.06
  -3  -2  -3    0.66    0.06
   3  -2   3    0.55    0.06
  -3  -2  -3    0.61    0.06
   3   2   3    0.57    0.06
  -3   2  -3    0.64    0.06
   3   2   3    0.54    0.06
  -3   2  -3    0.62    0.06
   4  -2   3   17.62    0.45
  -4  -2  -3   17.58    0.45
   4  -2   3   17.91    0.45
  -4  -2  -3   17.49    0.45
  -4   2  -3   17.66    0.45
  -4   2  -3   17.98    0.45
   4   2   3   17.07    0.45
   4   2   3   17.48    0.45
   5  -2   3    7.77    0.26
  -5  -2  -3    8.00    0.25
   5  -2   3    7.90    0.25
  -5  -2  -3    7.94    0.25
  -5   2  -3    7.64    0.25
   5   2   3    7.59    0.25
  -5   2  -3    7.83    0.25
   5   2   3    7.63    0.25
   6  -2   3    0.54    0.10
  -6  -2  -3    0.53    0.09
  -6  -2  -3    0.59    0.09
   6  -2   3    0.48    0.09
  -6   2  -3    0.61    0.10
  -6   2  -3    0.65    0.09
   6   2   3    0.65    0.10
   6   2   3    0.55    0.08
   7  -2   3    3.21    0.19
  -7  -2  -3    3.39    0.20
   7  -2   3    3.42    0.20
  -7  -2  -3    3.69    0.19
  -7   2  -3    3.41    0.20
   7   2   3    3.24    0.19
   7   2   3    3.37    0.20
  -7   2  -3    3.58    0.20
   8  -2   3    0.19    0.12
  -8  -2  -3   -0.03    0.12
  -8  -2  -3    0.12    0.11
   8  -2   3   -0.01    0.11
  -8   2  -3    0.22    0.12
  -8   2  -3    0.01    0.11
   8   2   3   -0.22    0.10
   8   2   3    0.16    0.18
   9  -2   3    0.16    0.15
  -9  -2  -3    0.27    0.16
  -9  -2  -3    0.54    0.14
   9  -2   3    0.53    0.18
   9   2   3    0.51    0.16
   9   2   3    0.20    0.23
  -9   2  -3    0.31    0.17
  10  -2   3    0.37    0.20
  10  -2   3    0.52    0.22
  10   2   3    0.62    0.19
  10   2   3    0.69    0.21
 -10   2  -3    0.64    0.19
 -10   2  -3    0.65    0.19
  11  -2   3   -0.18    0.30
 -11  -2  -3   -0.01    0.20
  11   2   3    0.07    0.23
 -11   2  -3    0.00    0.19
  11   2   3   -0.08    0.24
  12  -2   3   -0.06    0.28
 -12  -2  -3    0.23    0.27
 -12   2  -3   -0.05    0.18
  12   2   3   -0.22    0.17
 -12  -3   3    0.14    0.32
  12  -3  -3   -0.39    0.28
  12   3  -3   -0.24    0.16
 -12   3   3   -0.11    0.15
 -11  -3   3    0.18    0.17
  11  -3  -3   -0.24    0.22
  11   3  -3    0.03    0.20
 -11   3   3   -0.10    0.19
  11   3  -3    0.06    0.23
  10  -3  -3    0.35    0.22
  10  -3  -3    0.03    0.20
 -10  -3   3    0.14    0.23
 -10   3   3    0.33    0.18
  10   3  -3    0.23    0.17
  10   3  -3    0.10    0.21
 -10   3   3    0.19    0.17
   9  -3  -3   -0.11    0.15
   9  -3  -3    0.07    0.20
  -9  -3   3    0.08    0.13
  -9  -3   3   -0.11    0.11
   9   3  -3    0.07    0.12
  -9   3   3   -0.11    0.13
   9   3  -3    0.16    0.14
  -9   3   3    0.04    0.14
   8  -3  -3    2.50    0.21
  -8  -3   3    2.43    0.18
  -8  -3   3    2.79    0.21
   8  -3  -3    2.41    0.21
  -8   3   3    2.30    0.21
   8   3  -3    2.54    0.20
   8   3  -3    2.71    0.27
  -8   3   3    2.47    0.20
  -7  -3   3    0.80    0.12
  -7  -3   3    0.67    0.11
   7  -3  -3    0.73    0.13
   7  -3  -3    0.67    0.12
   7   3  -3    0.77    0.12
   7   3  -3    0.79    0.11
  -7   3   3    0.82    0.11
  -7   3   3    0.63    0.12
  -6  -3   3    0.52    0.09
   6  -3  -3    0.31    0.09
  -6  -3   3    0.39    0.10
   6  -3  -3    0.37    0.08
  -6   3   3    0.37    0.10
   6   3  -3    0.42    0.08
  -6   3   3    0.53    0.09
   6   3  -3    0.36    0.08
  -5  -3   3    3.37    0.15
   5  -3  -3    3.36    0.15
  -5  -3   3    3.65    0.15
   5  -3  -3    3.33    0.16
  -5   3   3    3.27    0.15
   5   3  -3    3.32    0.15
   5   3  -3    3.46    0.15
  -5   3   3    3.36    0.16
   4  -3  -3    0.36    0.07
  -4  -3   3    0.32    0.05
   4  -3  -3    0.30    0.06
  -4  -3   3    0.31    0.05
  -4   3   3    0.23    0.06
  -4   3   3    0.39    0.07
   4   3  -3    0.28    0.06
   4   3  -3    0.23    0.05
  -3  -3   3    1.29    0.09
   3  -3  -3    1.42    0.08
  -3  -3   3    1.30    0.07
   3  -3  -3    1.58    0.09
  -3  -3   3    1.45    0.08
  -3   3   3    1.56    0.09
   3   3  -3    1.52    0.08
   3   3  -3    1.41    0.08
  -3   3   3    1.50    0.08
  -2  -3   3   16.50    0.39
  -2  -3   3   16.19    0.39
   2  -3  -3   16.43    0.39
  -2  -3   3   15.85    0.39
   2  -3  -3   16.21    0.39
  -2  -3   3   16.03    0.39
   2  -3  -3   15.41    0.40
   2   3  -3   16.44    0.39
  -2   3   3   16.39    0.39
  -2   3   3   16.33    0.39
   2   3  -3   16.32    0.39
   2   3  -3   15.80    0.39
   2   3  -3   17.20    0.41
   1  -3  -3   15.04    0.36
  -1  -3   3   15.49    0.38
   1  -3  -3   15.20    0.36
  -1  -3   3   15.27    0.35
   1  -3  -3   14.14    0.38
  -1  -3   3   15.76    0.37
  -1   3   3   15.05    0.36
  -1   3   3   15.42    0.36
   1   3  -3   15.24    0.35
   1   3  -3   13.69    0.37
   1   3  -3   15.95    0.38
   1   3  -3   15.43    0.35
   1   3  -3   15.20    0.36
  -1   3   3   15.27    0.36
   0  -3   3   21.74    0.52
   0  -3   3   20.90    0.49
   0  -3  -3   20.25    0.49
   0  -3  -3   21.10    0.49
   0  -3  -3   21.48    0.50
   0  -3  -3   22.05    0.51
   0  -3   3   21.47    0.51
   0   3   3   21.71    0.49
   0   3   3   21.50    0.49
   0   3  -3   20.83    0.49
   0   3  -3   21.56    0.49
   0   3  -3   20.99    0.50
   0   3  -3   22.11    0.52
   0   3   3   21.97    0.50
   0   3  -3   22.12    0.50
   0   3   3   21.32    0.51
   0   3   3   22.07    0.51
  -1  -3  -3   11.01    0.27
  -1  -3  -3   11.18    0.27
   1  -3   3   10.85    0.28
  -1  -3  -3   11.18    0.27
   1  -3   3   11.09    0.27
  -1  -3  -3   11.79    0.29
   1  -3   3   11.23    0.27
   1  -3   3   10.90    0.29
   1   3   3   11.08    0.26
   1   3   3   11.32    0.27
   1   3   3   11.26    0.27
  -1   3  -3   11.10    0.28
   1   3   3   11.31    0.27
  -1   3  -3   11.17    0.27
  -1   3  -3   11.38    0.27
  -2  -3  -3   25.94    0.61
   2  -3   3   25.96    0.62
  -2  -3  -3   26.34    0.61
   2  -3   3   26.67    0.62
   2   3   3   26.53    0.61
   2   3   3   26.28    0.61
  -2   3  -3   26.44    0.61
  -2   3  -3   26.47    0.62
  -2   3  -3   26.68    0.62
   2   3   3   26.72    0.61
   3  -3   3    2.70    0.11
  -3  -3  -3    2.61    0.11
   3  -3   3    2.60    0.10
  -3  -3  -3    2.63    0.11
   3  -3   3    2.64    0.11
  -3   3  -3    2.68    0.11
   3   3   3    2.65    0.11
   3   3   3    2.71    0.10
  -3   3  -3    2.82    0.11
  -4  -3  -3    4.63    0.17
   4  -3   3    4.85    0.18
  -4  -3  -3    4.66    0.16
   4  -3   3    4.85    0.17
  -4   3  -3    4.83    0.17
   4   3   3    4.81    0.17
   4   3   3    4.54    0.17
  -4   3  -3    4.99    0.17
  -5  -3  -3    1.36    0.10
   5  -3   3    1.35    0.13
   5  -3   3    1.33    0.12
  -5  -3  -3    1.32    0.11
   5   3   3    1.26    0.12
  -5   3  -3    1.36    0.13
   5   3   3    1.32    0.11
  -5   3  -3    1.25    0.11
   6  -3   3    3.08    0.17
  -6  -3  -3    2.94    0.17
  -6  -3  -3    2.90    0.17
   6  -3   3    2.80    0.17
   6   3   3    2.94    0.16
  -6   3  -3    2.98    0.16
   6   3   3    2.62    0.15
  -6   3  -3    2.87    0.17
  -7  -3  -3    1.77    0.15
   7  -3   3    1.47    0.17
  -7  -3  -3    1.65    0.15
   7  -3   3    1.56    0.18
   7   3   3    1.53    0.16
  -7   3  -3    1.27    0.14
  -7   3  -3    1.77    0.16
   7   3   3    1.45    0.15
  -8  -3  -3    0.02    0.11
  -8  -3  -3   -0.27    0.10
   8  -3   3   -0.09    0.11
   8  -3   3   -0.09    0.11
   8   3   3   -0.06    0.12
   8   3   3    0.08    0.17
  -8   3  -3    0.04    0.13
  -8   3  -3    0.13    0.13
   9  -3   3    0.58    0.16
  -9  -3  -3    0.53    0.17
   9  -3   3    0.57    0.24
  -9  -3  -3    0.16    0.14
   9   3   3    0.29    0.16
  -9   3  -3    0.22    0.15
   9   3   3    0.46    0.17
  -9   3  -3    0.62    0.16
 -10  -3  -3    0.51    0.20
  10  -3   3   -0.08    0.20
 -10   3  -3    0.05    0.18
  10   3   3    0.08    0.18
  10   3   3    0.12    0.18
 -10   3  -3    0.08    0.16
  11  -3   3   -0.34    0.27
 -11  -3  -3    0.05    0.22
  11   3   3   -0.14    0.24
  11   3   3   -0.35    0.21
 -11   3  -3    0.14    0.21
  12  -3   3    0.01    0.29
 -12  -3  -3    0.50    0.28
  12   3   3    0.10    0.14
 -12   3  -3   -0.27    0.16
 -12  -4   3   -0.06    0.25
  12  -4  -3    0.13    0.33
  12   4  -3    0.18    0.16
 -11  -4   3    0.73    0.26
  11  -4  -3    0.94    0.27
 -11   4   3    0.83    0.22
  11   4  -3    0.89    0.25
  11   4  -3    0.27    0.23
 -10  -4   3    0.93    0.23
  10  -4  -3    0.66    0.21
 -10   4   3    0.41    0.18
  10   4  -3    0.34    0.20
  10   4  -3    0.58    0.20
 -10   4   3    0.69    0.21
  -9  -4   3    0.12    0.15
   9  -4  -3    0.46    0.19
  -9  -4   3    0.43    0.16
   9  -4  -3    0.25    0.16
   9   4  -3    0.42    0.16
  -9   4   3    0.47    0.16
  -9   4   3    0.37    0.15
   9   4  -3    0.53    0.16
  -8  -4   3   -0.10    0.11
  -8  -4   3    0.12    0.12
   8  -4  -3   -0.13    0.12
   8  -4  -3   -0.13    0.11
   8   4  -3    0.15    0.11
   8   4  -3    0.11    0.15
  -8   4   3    0.05    0.14
  -8   4   3   -0.08    0.11
  -7  -4   3    1.02    0.13
   7  -4  -3    0.89    0.12
   7  -4  -3    0.86    0.14
  -7  -4   3    0.99    0.12
  -7   4   3    0.76    0.11
  -7   4   3    1.00    0.14
   7   4  -3    1.01    0.12
   7   4  -3    1.05    0.12
   6  -4  -3    0.85    0.10
   6  -4  -3    0.97    0.12
  -6  -4   3    0.90    0.11
  -6  -4   3    0.85    0.10
   6   4  -3    0.82    0.10
   6   4  -3    0.93    0.11
  -6   4   3    0.91    0.11
  -6   4   3    0.92    0.11
   5  -4  -3    0.07    0.07
   5  -4  -3    0.01    0.06
  -5  -4   3    0.07    0.06
  -5  -4   3    0.03    0.05
  -5  -4   3    0.06    0.06
   5   4  -3   -0.10    0.06
   5   4  -3    0.08    0.06
  -5   4   3    0.11    0.06
  -5   4   3   -0.03    0.05
   4  -4  -3    0.82    0.08
  -4  -4   3    0.90    0.08
  -4  -4   3    0.87    0.09
   4  -4  -3    0.87    0.10
  -4  -4   3    0.88    0.07
   4   4  -3    0.80    0.08
   4   4  -3    0.70    0.08
  -4   4   3    0.88    0.09
  -4   4   3    0.90    0.09
   3  -4  -3    0.34    0.06
  -3  -4   3    0.34    0.05
  -3  -4   3    0.35    0.05
  -3  -4   3    0.30    0.04
  -3  -4   3    0.43    0.06
   3  -4  -3    0.37    0.05
  -3   4   3    0.33    0.05
   3   4  -3    0.42    0.05
   3   4  -3    0.34    0.05
  -3   4   3    0.33    0.05
   2  -4  -3   23.45    0.56
   2  -4  -3   23.34    0.55
  -2  -4   3   23.41    0.55
  -2  -4   3   23.72    0.56
  -2  -4   3   23.49    0.56
   2  -4  -3   23.82    0.56
  -2  -4   3   23.62    0.55
   2   4  -3   23.43    0.55
  -2   4   3   23.94    0.55
   2   4  -3   23.11    0.55
   2   4  -3   23.64    0.58
   2   4  -3   23.19    0.55
  -2   4   3   23.67    0.56
   1  -4  -3    0.74    0.05
   1  -4  -3    0.87    0.05
  -1  -4   3    0.83    0.04
  -1  -4   3    0.81    0.07
   1  -4  -3    0.90    0.05
  -1  -4   3    0.79    0.06
   1  -4  -3    0.89    0.07
   1   4  -3    0.85    0.04
   1   4  -3    0.96    0.06
  -1   4   3    0.84    0.04
   1   4  -3    0.92    0.06
  -1   4   3    0.91    0.05
  -1   4   3    0.83    0.06
   1   4  -3    0.81    0.06
   1   4  -3    0.83    0.06
   1   4  -3    0.84    0.04
  -1   4   3    0.84    0.05
   0  -4   3    0.35    0.05
   0  -4  -3    0.34    0.03
   0  -4  -3    0.31    0.04
   0  -4   3    0.38    0.03
   0  -4   3    0.39    0.04
   0  -4  -3    0.36    0.05
   0   4  -3    0.38    0.03
   0   4   3    0.38    0.05
   0   4  -3    0.42    0.03
   0   4   3    0.40    0.05
   0   4  -3    0.42    0.05
   0   4   3    0.35    0.03
   0   4   3    0.40    0.03
   0   4   3    0.36    0.03
   0   4  -3    0.36    0.05
   0   4   3    0.36    0.04
   0   4  -3    0.34    0.04
   1  -4   3   11.38    0.31
   1  -4   3   11.56    0.28
  -1  -4  -3   11.63    0.30
   1  -4   3   11.14    0.27
  -1  -4  -3   11.39    0.29
   1  -4   3   11.36    0.29
   1   4   3   11.37    0.27
  -1   4  -3   11.54    0.28
  -1   4  -3   11.62    0.27
   1   4   3   11.45    0.29
   1   4   3   11.52    0.27
  -1   4  -3   11.76    0.29
   1   4   3   11.25    0.27
  -2  -4  -3   19.88    0.47
   2  -4   3   20.07    0.48
   2  -4   3   20.15    0.47
  -2  -4  -3   20.03    0.49
   2  -4   3   20.17    0.48
  -2  -4  -3   19.93    0.47
  -2  -4  -3   19.70    0.46
   2   4   3   20.20    0.47
   2   4   3   20.36    0.48
   2   4   3   19.74    0.47
  -2   4  -3   19.85    0.47
   2   4   3   19.28    0.46
  -2   4  -3   19.92    0.48
  -2   4  -3   20.34    0.48
  -3  -4  -3    7.20    0.23
   3  -4   3    7.72    0.22
   3  -4   3    7.51    0.22
  -3  -4  -3    7.63    0.21
   3  -4   3    7.96    0.23
  -3  -4  -3    7.69    0.20
   3   4   3    7.47    0.21
   3   4   3    7.64    0.21
   3   4   3    7.55    0.22
  -3   4  -3    7.91    0.22
  -3   4  -3    7.49    0.22
  -4  -4  -3    7.29    0.21
   4  -4   3    7.40    0.22
   4  -4   3    7.56    0.23
   4  -4   3    7.79    0.24
  -4  -4  -3    7.58    0.23
  -4  -4  -3    7.73    0.23
   4   4   3    7.56    0.23
   4   4   3    7.34    0.22
  -4   4  -3    7.31    0.23
  -4   4  -3    7.53    0.23
   5  -4   3    4.25    0.18
  -5  -4  -3    4.61    0.18
   5  -4   3    4.67    0.19
   5  -4   3    4.38    0.17
  -5   4  -3    4.61    0.18
  -5   4  -3    4.59    0.18
   5   4   3    4.24    0.17
   5   4   3    4.34    0.17
  -6  -4  -3    0.10    0.08
  -6  -4  -3    0.23    0.08
   6  -4   3    0.14    0.11
   6  -4   3    0.09    0.08
  -6   4  -3    0.11    0.08
   6   4   3    0.13    0.07
   6   4   3    0.16    0.08
  -6   4  -3    0.22    0.09
  -7  -4  -3    0.76    0.12
  -7  -4  -3    0.84    0.12
   7  -4   3    0.69    0.12
   7  -4   3    0.65    0.13
  -7   4  -3    0.79    0.12
  -7   4  -3    0.94    0.13
   7   4   3    0.70    0.11
   7   4   3    0.60    0.12
  -8  -4  -3    0.42    0.12
   8  -4   3    0.46    0.14
  -8  -4  -3    0.44    0.13
   8  -4   3    0.51    0.14
  -8   4  -3    0.53    0.14
   8   4   3    0.54    0.16
   8   4   3    0.59    0.14
  -8   4  -3    0.57    0.14
   9  -4   3   -0.05    0.24
   9  -4   3   -0.11    0.14
  -9  -4  -3   -0.13    0.13
  -9  -4  -3   -0.03    0.14
   9   4   3    0.03    0.16
   9   4   3    0.07    0.15
  -9   4  -3   -0.10    0.14
  -9   4  -3    0.00    0.14
 -10  -4  -3    0.34    0.22
  10  -4   3   -0.05    0.23
  10   4   3    0.43    0.24
 -10   4  -3    0.34    0.20
 -10   4  -3   -0.26    0.15
  10   4   3   -0.09    0.19
  11  -4   3   -0.26    0.23
 -11  -4  -3    0.05    0.19
 -11   4  -3   -0.07    0.19
  11   4   3   -0.17    0.21
  11   4   3    0.00    0.25
 -12  -4  -3   -0.02    0.29
  12  -4   3    0.10    0.21
  12  -4   3   -0.30    0.33
 -12  -5   3   -0.13    0.21
 -12  -5   3   -0.01    0.28
  12  -5  -3    0.38    0.33
 -11  -5   3    0.13    0.24
  11  -5  -3    0.16    0.25
 -11  -5   3   -0.16    0.18
  11   5  -3    0.39    0.23
  11   5  -3    0.09    0.24
 -11   5   3    0.17    0.21
 -11   5   3    0.08    0.28
 -10  -5   3    0.33    0.17
  10  -5  -3   -0.07    0.34
 -10  -5   3   -0.12    0.13
  10   5  -3   -0.02    0.19
 -10   5   3    0.44    0.20
 -10   5   3   -0.04    0.18
  10   5  -3    0.34    0.22
   9  -5  -3    0.06    0.15
  -9  -5   3    0.11    0.14
  -9  -5   3    0.09    0.13
   9  -5  -3   -0.04    0.16
  -9  -5   3   -0.09    0.13
   9   5  -3   -0.03    0.13
  -9   5   3   -0.02    0.15
  -9   5   3    0.12    0.15
   9   5  -3    0.05    0.15
  -8  -5   3    0.70    0.13
   8  -5  -3    0.77    0.14
  -8  -5   3    0.92    0.13
   8  -5  -3    0.87    0.15
  -8  -5   3    0.77    0.15
  -8   5   3    0.65    0.14
  -8   5   3    0.80    0.14
   8   5  -3    0.85    0.16
   8   5  -3    0.92    0.16
  -7  -5   3    0.46    0.09
  -7  -5   3    0.27    0.10
  -7  -5   3    0.31    0.10
   7  -5  -3    0.22    0.10
   7  -5  -3    0.45    0.12
   7   5  -3    0.52    0.11
  -7   5   3    0.44    0.11
   7   5  -3    0.48    0.11
  -6  -5   3    2.39    0.15
   6  -5  -3    2.28    0.16
  -6  -5   3    2.30    0.14
   6  -5  -3    2.22    0.17
  -6  -5   3    2.40    0.14
  -6   5   3    2.03    0.14
   6   5  -3    2.29    0.16
  -6   5   3    2.41    0.17
   6   5  -3    2.62    0.16
  -5  -5   3    0.68    0.08
   5  -5  -3    0.68    0.11
  -5  -5   3    0.69    0.08
   5  -5  -3    0.71    0.10
   5   5  -3    0.63    0.08
  -5   5   3    0.60    0.08
   5   5  -3    0.50    0.08
  -5   5   3    0.75    0.09
   4  -5  -3    0.14    0.06
  -4  -5   3    0.06    0.05
   4  -5  -3    0.08    0.05
  -4  -5   3    0.11    0.06
  -4  -5   3    0.09    0.05
  -4  -5   3    0.12    0.05
   4   5  -3    0.03    0.05
   4   5  -3    0.12    0.05
  -4   5   3    0.08    0.05
  -4   5   3    0.10    0.06
   3  -5  -3    0.33    0.05
   3  -5  -3    0.46    0.06
  -3  -5   3    0.34    0.05
   3  -5  -3    0.43    0.06
  -3  -5   3    0.35    0.05
  -3  -5   3    0.36    0.06
  -3  -5   3    0.35    0.06
   3   5  -3    0.47    0.07
  -3   5   3    0.32    0.05
   3   5  -3    0.42    0.05
   3   5  -3    0.45    0.06
  -3   5   3    0.25    0.05
   3   5  -3    0.39    0.05
  -2  -5   3   16.72    0.39
   2  -5  -3   16.29    0.40
   2  -5  -3   15.75    0.42
  -2  -5   3   16.50    0.41
  -2  -5   3   15.65    0.41
   2  -5  -3   16.38    0.42
   2  -5  -3   16.32    0.40
  -2   5   3   16.49    0.40
   2   5  -3   16.86    0.44
   2   5  -3   16.08    0.40
  -2   5   3   16.29    0.40
   2   5  -3   15.63    0.40
   2   5  -3   16.30    0.39
   2   5  -3   16.29    0.39
  -1  -5   3   21.17    0.50
   1  -5  -3   20.34    0.51
   1  -5  -3   19.90    0.47
  -1  -5   3   19.36    0.46
   1  -5  -3   20.30    0.50
   1  -5  -3   20.37    0.48
  -1  -5   3   20.64    0.52
  -1  -5   3   19.81    0.47
   1   5  -3   20.05    0.50
  -1   5   3   20.79    0.51
   1   5  -3   21.13    0.50
   1   5  -3   19.94    0.46
   1   5  -3   20.78    0.50
  -1   5   3   20.73    0.50
  -1   5   3   20.61    0.48
   1   5  -3   20.77    0.52
   1   5  -3   20.29    0.47
  -1   5   3   20.06    0.47
   0  -5  -3    5.31    0.17
   0  -5  -3    5.29    0.14
   0  -5   3    5.55    0.14
   0  -5   3    5.24    0.16
   0  -5   3    5.14    0.18
   0  -5  -3    5.45    0.18
   0  -5   3    5.31    0.13
   0   5   3    5.47    0.18
   0   5   3    5.43    0.14
   0   5  -3    5.39    0.17
   0   5   3    5.54    0.17
   0   5   3    5.41    0.18
   0   5  -3    5.50    0.13
   0   5  -3    5.45    0.17
   0   5   3    5.39    0.13
   0   5  -3    5.38    0.13
   0   5  -3    5.40    0.18
  -1  -5  -3    8.73    0.24
   1  -5   3    8.62    0.25
  -1  -5  -3    8.83    0.22
   1  -5   3    8.95    0.27
  -1  -5  -3    9.20    0.26
   1  -5   3    9.00    0.22
  -1   5  -3    9.09    0.22
   1   5   3    8.83    0.24
   1   5   3    9.47    0.26
   1   5   3    8.98    0.23
  -1   5  -3    8.98    0.22
   1   5   3    8.76    0.22
  -1   5  -3    9.21    0.25
   1   5   3    8.95    0.22
   1   5   3    8.67    0.25
  -2  -5  -3    8.29    0.21
   2  -5   3    8.33    0.24
   2  -5   3    8.41    0.22
  -2  -5  -3    8.20    0.22
  -2  -5  -3    8.67    0.25
   2  -5   3    8.42    0.22
  -2  -5  -3    8.20    0.22
   2  -5   3    7.90    0.25
   2   5   3    8.40    0.23
  -2   5  -3    8.15    0.24
  -2   5  -3    8.33    0.22
   2   5   3    8.03    0.21
  -2   5  -3    8.33    0.22
   2   5   3    8.26    0.21
   2   5   3    8.11    0.22
  -3  -5  -3   11.98    0.30
  -3  -5  -3   11.48    0.32
  -3  -5  -3   11.85    0.31
   3  -5   3   11.86    0.31
   3  -5   3   11.70    0.32
   3  -5   3   11.95    0.32
  -3  -5  -3   11.60    0.30
   3   5   3   11.72    0.30
   3   5   3   11.88    0.31
   3   5   3   11.72    0.31
  -3   5  -3   12.01    0.31
  -3   5  -3   11.75    0.31
  -4  -5  -3    1.04    0.09
  -4  -5  -3    1.04    0.08
   4  -5   3    1.06    0.11
   4  -5   3    0.86    0.09
  -4  -5  -3    0.97    0.09
   4  -5   3    1.03    0.10
   4   5   3    1.03    0.09
   4   5   3    1.13    0.09
  -4   5  -3    1.15    0.09
  -4   5  -3    1.02    0.09
   4   5   3    1.22    0.09
  -5  -5  -3   -0.01    0.06
   5  -5   3    0.01    0.07
  -5  -5  -3    0.01    0.05
   5  -5   3    0.08    0.06
  -5  -5  -3   -0.09    0.06
   5  -5   3    0.00    0.08
  -5   5  -3    0.08    0.07
   5   5   3   -0.05    0.06
  -5   5  -3    0.02    0.07
   5   5   3    0.01    0.06
  -6  -5  -3    1.18    0.10
   6  -5   3    1.34    0.15
   6  -5   3    1.10    0.11
  -6  -5  -3    1.22    0.13
  -6  -5  -3    1.50    0.14
   6  -5   3    1.18    0.14
   6   5   3    1.07    0.13
  -6   5  -3    1.13    0.13
   6   5   3    1.11    0.13
  -6   5  -3    1.17    0.14
   7  -5   3    0.31    0.10
  -7  -5  -3    0.34    0.08
  -7  -5  -3    0.31    0.11
  -7  -5  -3    0.28    0.10
   7  -5   3    0.29    0.12
   7  -5   3    0.28    0.11
  -7   5  -3    0.11    0.13
   7   5   3    0.45    0.11
   7   5   3    0.29    0.11
  -7   5  -3    0.43    0.11
  -8  -5  -3    0.15    0.12
   8  -5   3    0.07    0.12
  -8  -5  -3    0.08    0.12
   8  -5   3    0.33    0.15
   8  -5   3    0.05    0.10
   8   5   3    0.05    0.12
  -8   5  -3    0.11    0.13
   8   5   3    0.12    0.14
  -9  -5  -3   -0.10    0.13
   9  -5   3    0.05    0.23
   9  -5   3    0.04    0.12
  -9   5  -3    0.14    0.13
   9   5   3   -0.19    0.15
   9   5   3    0.10    0.14
  -9   5  -3    0.07    0.15
 -10  -5  -3    0.40    0.22
  10  -5   3   -0.19    0.15
  10  -5   3   -0.23    0.21
 -10   5  -3   -0.01    0.17
  10   5   3   -0.41    0.18
  10   5   3   -0.11    0.19
 -10   5  -3   -0.06    0.21
 -11  -5  -3   -0.25    0.15
  11  -5   3    0.12    0.42
 -11  -5  -3    0.05    0.26
  11  -5   3   -0.11    0.18
  11   5   3    0.13    0.21
 -11   5  -3    0.21    0.22
  11   5   3    0.17    0.24
 -12  -5  -3    0.50    0.36
  12  -5   3    0.27    0.32
  12  -5   3    0.07    0.22
 -12  -5  -3   -0.36    0.19
  12   5   3   -0.42    0.28
 -12   5  -3    0.01    0.23
 -12  -6   3    0.42    0.30
  12  -6  -3    0.63    0.32
 -12  -6   3    0.39    0.23
 -12   6   3    0.11    0.27
  12   6  -3   -0.34    0.26
  11  -6  -3   -0.02    0.25
 -11  -6   3    0.22    0.30
 -11  -6   3   -0.05    0.19
 -11   6   3   -0.01    0.19
  11   6  -3   -0.05    0.25
  11   6  -3    0.06    0.23
 -11   6   3    0.16    0.32
 -10  -6   3    0.20    0.18
 -10  -6   3    0.38    0.16
  10   6  -3    0.46    0.20
 -10   6   3    0.26    0.19
 -10   6   3    0.36    0.20
  10   6  -3   -0.15    0.18
  -9  -6   3   -0.03    0.14
   9  -6  -3    0.39    0.20
   9  -6  -3    0.16    0.18
  -9  -6   3    0.20    0.20
  -9   6   3    0.30    0.17
   9   6  -3    0.04    0.15
  -9   6   3    0.39    0.14
   9   6  -3    0.13    0.16
  -8  -6   3    0.07    0.12
  -8  -6   3   -0.15    0.09
   8  -6  -3    0.17    0.14
   8  -6  -3    0.17    0.14
  -8  -6   3   -0.13    0.14
   8   6  -3    0.10    0.15
  -8   6   3    0.11    0.13
  -8   6   3    0.06    0.14
   8   6  -3   -0.05    0.11
  -7  -6   3    0.01    0.09
   7  -6  -3    0.27    0.13
  -7  -6   3    0.16    0.09
  -7  -6   3    0.16    0.10
   7  -6  -3    0.10    0.11
   7   6  -3    0.07    0.09
   7   6  -3    0.21    0.10
  -7   6   3    0.03    0.11
  -7   6   3    0.12    0.11
   6  -6  -3    9.92    0.32
  -6  -6   3    9.61    0.30
  -6  -6   3    9.96    0.31
   6  -6  -3   10.41    0.34
  -6  -6   3    9.42    0.30
  -6  -6   3    9.51    0.31
  -6   6   3    9.40    0.32
   6   6  -3    9.74    0.31
   6   6  -3    9.67    0.31
  -6   6   3    9.47    0.31
  -5  -6   3    0.05    0.06
   5  -6  -3    0.02    0.06
  -5  -6   3    0.14    0.07
   5  -6  -3    0.08    0.08
  -5  -6   3    0.05    0.07
  -5  -6   3   -0.03    0.06
  -5   6   3    0.05    0.07
  -5   6   3    0.09    0.06
   5   6  -3    0.09    0.06
   5   6  -3    0.03    0.07
  -4  -6   3    0.30    0.07
  -4  -6   3    0.15    0.06
   4  -6  -3    0.17    0.07
   4  -6  -3    0.18    0.06
  -4  -6   3    0.14    0.05
   4  -6  -3    0.23    0.07
   4  -6  -3    0.19    0.06
  -4   6   3    0.17    0.06
   4   6  -3    0.29    0.06
   4   6  -3    0.24    0.06
  -4   6   3    0.11    0.05
   4   6  -3    0.10    0.05
   3  -6  -3    3.01    0.13
   3  -6  -3    3.04    0.14
  -3  -6   3    3.01    0.11
  -3  -6   3    2.90    0.11
   3  -6  -3    2.87    0.12
  -3  -6   3    3.06    0.14
  -3  -6   3    2.79    0.14
   3   6  -3    2.93    0.12
   3   6  -3    3.03    0.11
   3   6  -3    3.11    0.13
   3   6  -3    2.85    0.14
  -3   6   3    3.00    0.12
  -3   6   3    3.02    0.12
  -2  -6   3   21.61    0.52
   2  -6  -3   22.66    0.56
   2  -6  -3   22.51    0.53
   2  -6  -3   22.58    0.53
  -2  -6   3   22.42    0.55
   2  -6  -3   22.04    0.56
  -2  -6   3   21.84    0.55
  -2   6   3   22.32    0.53
   2   6  -3   21.67    0.51
   2   6  -3   22.39    0.55
   2   6  -3   22.66    0.58
   2   6  -3   22.00    0.51
  -2   6   3   22.01    0.53
   2   6  -3   21.96    0.54
  -1  -6   3    3.87    0.10
  -1  -6   3    4.00    0.10
   1  -6  -3    4.01    0.12
  -1  -6   3    3.79    0.16
   1  -6  -3    3.84    0.15
   1  -6  -3    3.95    0.15
   1   6  -3    3.92    0.15
   1   6  -3    3.83    0.15
  -1   6   3    3.97    0.11
  -1   6   3    3.97    0.12
   1   6  -3    3.76    0.15
  -1   6   3    3.70    0.15
   1   6  -3    4.10    0.10
  -1   6   3    4.03    0.15
   1   6  -3    3.93    0.14
   1   6  -3    3.90    0.10
   1   6  -3    3.76    0.16
   0  -6   3   41.37    0.96
   0  -6  -3   41.89    0.97
   0  -6  -3   40.96    0.92
   0  -6   3   41.17    1.00
   0  -6   3   41.59    0.92
   0  -6  -3   40.63    0.92
   0  -6   3   39.47    0.92
   0   6   3   42.55    0.98
   0   6   3   40.88    0.97
   0   6  -3   41.74    0.97
   0   6  -3   42.72    0.97
   0   6   3   42.40    0.96
   0   6  -3   40.61    0.92
   0   6  -3   41.97    0.99
   0   6   3   39.74    0.92
   0   6   3   40.66    0.92
   0   6  -3   40.34    0.92
   1  -6   3   28.30    0.68
  -1  -6  -3   26.55    0.65
  -1  -6  -3   27.10    0.63
  -1  -6  -3   28.64    0.69
   1  -6   3   27.59    0.64
   1  -6   3   27.84    0.70
   1  -6   3   28.36    0.67
  -1  -6  -3   27.69    0.67
   1   6   3   27.47    0.65
   1   6   3   28.39    0.68
  -1   6  -3   28.18    0.67
   1   6   3   28.39    0.67
   1   6   3   27.77    0.63
  -1   6  -3   27.59    0.64
   1   6   3   29.24    0.70
  -1   6  -3   27.83    0.64
   1   6   3   27.75    0.63
  -2  -6  -3   23.47    0.55
  -2  -6  -3   24.43    0.60
   2  -6   3   24.06    0.59
   2  -6   3   23.75    0.56
   2  -6   3   24.40    0.57
   2  -6   3   23.32    0.62
  -2   6  -3   23.93    0.56
   2   6   3   23.08    0.55
   2   6   3   23.86    0.56
  -2   6  -3   23.97    0.59
  -2   6  -3   24.16    0.56
   2   6   3   24.69    0.58
   2   6   3   23.80    0.56
  -3  -6  -3    0.01    0.05
   3  -6   3    0.06    0.06
  -3  -6  -3    0.00    0.04
   3  -6   3    0.07    0.05
   3  -6   3    0.01    0.04
  -3  -6  -3   -0.02    0.06
  -3  -6  -3    0.07    0.04
   3   6   3    0.05    0.05
  -3   6  -3   -0.03    0.04
   3   6   3    0.00    0.04
  -3   6  -3    0.02    0.04
   3   6   3    0.01    0.04
   4  -6   3    1.77    0.12
   4  -6   3    1.79    0.12
  -4  -6  -3    1.49    0.12
  -4  -6  -3    1.63    0.10
  -4  -6  -3    1.73    0.10
  -4  -6  -3    1.78    0.11
   4  -6   3    1.66    0.12
  -4   6  -3    1.67    0.11
   4   6   3    1.67    0.11
  -4   6  -3    1.56    0.11
   4   6   3    1.66    0.10
   4   6   3    1.73    0.11
   5  -6   3    0.97    0.11
  -5  -6  -3    0.94    0.10
   5  -6   3    0.98    0.10
   5  -6   3    0.94    0.11
  -5  -6  -3    0.80    0.09
  -5  -6  -3    1.01    0.11
  -5   6  -3    0.93    0.11
   5   6   3    0.87    0.09
   5   6   3    0.81    0.09
   5   6   3    0.83    0.10
  -5   6  -3    0.93    0.12
   6  -6   3    3.68    0.20
  -6  -6  -3    3.93    0.16
  -6  -6  -3    3.61    0.18
   6  -6   3    3.92    0.19
  -6  -6  -3    4.33    0.19
   6  -6   3    4.06    0.20
  -6   6  -3    3.56    0.20
   6   6   3    3.66    0.19
  -6   6  -3    4.01    0.19
   6   6   3    4.08    0.18
  -7  -6  -3    0.05    0.09
   7  -6   3    0.09    0.10
  -7  -6  -3    0.18    0.08
   7  -6   3    0.18    0.13
   7  -6   3   -0.06    0.11
  -7  -6  -3    0.24    0.10
   7   6   3    0.08    0.10
  -7   6  -3    0.20    0.12
  -7   6  -3    0.22    0.13
   7   6   3    0.14    0.14
  -8  -6  -3    0.00    0.11
   8  -6   3   -0.20    0.15
  -8  -6  -3    0.01    0.09
  -8  -6  -3    0.05    0.12
   8  -6   3   -0.01    0.11
   8  -6   3   -0.06    0.12
  -8   6  -3   -0.09    0.13
   8   6   3   -0.09    0.14
  -8   6  -3    0.06    0.13
   8   6   3   -0.05    0.13
   9  -6   3    0.03    0.13
   9  -6   3    0.14    0.19
  -9  -6  -3    0.14    0.18
  -9  -6  -3    0.18    0.15
  -9  -6  -3   -0.01    0.11
  -9   6  -3    0.15    0.15
   9   6   3    0.14    0.17
   9   6   3   -0.12    0.16
  -9   6  -3   -0.05    0.16
 -10  -6  -3    0.57    0.23
  10  -6   3    0.13    0.27
 -10  -6  -3    0.47    0.29
  10  -6   3    0.31    0.17
  10   6   3    0.20    0.19
 -10   6  -3    0.19    0.23
 -10   6  -3    0.48    0.17
  10   6   3    0.43    0.21
  11  -6   3   -0.34    0.20
 -11  -6  -3    0.10    0.17
 -11  -6  -3    0.20    0.27
  11  -6   3    0.27    0.30
  11   6   3   -0.06    0.26
 -11   6  -3   -0.21    0.12
  11   6   3    0.10    0.16
  12  -6   3   -0.40    0.36
 -12  -6  -3    0.08    0.22
 -12  -6  -3    0.25    0.30
  12  -6   3    0.52    0.26
  12   6   3    0.25    0.36
 -12   6  -3    0.76    0.53
  12  -7  -3    0.24    0.26
 -12  -7   3    0.82    0.16
  12  -7  -3    0.75    0.36
 -12  -7   3    0.00    0.29
  12   7  -3    0.61    0.37
  11  -7  -3    0.26    0.30
 -11  -7   3    0.47    0.29
 -11  -7   3    0.11    0.19
  11   7  -3   -0.07    0.27
 -11   7   3   -0.09    0.14
  11   7  -3    0.14    0.16
 -10  -7   3    0.26    0.18
  10  -7  -3    0.18    0.27
 -10  -7   3    0.30    0.18
 -10   7   3    0.34    0.17
  10   7  -3    0.39    0.20
 -10   7   3    0.73    0.25
  10   7  -3    0.31    0.18
  -9  -7   3    1.01    0.19
   9  -7  -3    0.98    0.22
  -9  -7   3    0.72    0.21
  -9  -7   3    1.05    0.17
  -9  -7   3    0.51    0.17
  -9   7   3    1.00    0.20
  -9   7   3    0.77    0.17
   9   7  -3    0.75    0.19
   9   7  -3    0.66    0.17
   8  -7  -3    0.06    0.16
  -8  -7   3    0.04    0.13
   8  -7  -3    0.39    0.15
  -8  -7   3    0.34    0.12
  -8  -7   3    0.48    0.14
  -8  -7   3    0.17    0.17
   8   7  -3   -0.08    0.13
  -8   7   3    0.05    0.12
  -8   7   3    0.16    0.14
   8   7  -3    0.34    0.13
  -7  -7   3    3.82    0.21
  -7  -7   3    3.89    0.21
  -7  -7   3    3.75    0.21
   7  -7  -3    3.77    0.25
   7  -7  -3    3.73    0.22
  -7  -7   3    3.79    0.22
  -7   7   3    3.74    0.24
   7   7  -3    3.69    0.26
   7   7  -3    3.75    0.21
  -7   7   3    3.71    0.23
  -6  -7   3    0.47    0.11
   6  -7  -3    0.32    0.10
  -6  -7   3    0.44    0.11
   6  -7  -3    0.44    0.11
  -6  -7   3    0.40    0.09
  -6  -7   3    0.53    0.10
   6  -7  -3    0.25    0.11
  -6   7   3    0.35    0.10
  -6   7   3    0.55    0.09
   6   7  -3    0.49    0.10
   6   7  -3    0.37    0.09
  -5  -7   3    2.20    0.15
   5  -7  -3    2.29    0.14
   5  -7  -3    2.60    0.16
   5  -7  -3    2.20    0.15
  -5  -7   3    2.36    0.14
  -5  -7   3    2.00    0.17
  -5  -7   3    2.52    0.14
  -5   7   3    2.26    0.15
   5   7  -3    2.61    0.16
   5   7  -3    2.36    0.14
  -5   7   3    2.31    0.14
   5   7  -3    2.32    0.13
   4  -7  -3    2.48    0.15
   4  -7  -3    2.97    0.15
  -4  -7   3    2.98    0.13
   4  -7  -3    2.82    0.15
  -4  -7   3    3.07    0.15
   4  -7  -3    2.91    0.17
  -4  -7   3    2.78    0.12
  -4  -7   3    3.00    0.16
  -4   7   3    2.78    0.14
  -4   7   3    2.88    0.14
   4   7  -3    2.71    0.16
   4   7  -3    2.86    0.13
   4   7  -3    2.98    0.13
  -3  -7   3    1.96    0.13
   3  -7  -3    1.90    0.12
   3  -7  -3    1.84    0.11
   3  -7  -3    2.07    0.11
   3  -7  -3    1.90    0.12
  -3  -7   3    1.92    0.13
  -3  -7   3    1.86    0.09
   3   7  -3    1.72    0.11
  -3   7   3    1.82    0.10
  -3   7   3    1.94    0.10
   3   7  -3    1.78    0.09
   3   7  -3    1.80    0.14
   3   7  -3    1.92    0.09
   3   7  -3    1.70    0.15
   2  -7  -3   13.55    0.38
  -2  -7   3   13.48    0.37
   2  -7  -3   12.91    0.37
   2  -7  -3   13.52    0.34
   2  -7  -3   13.73    0.34
  -2  -7   3   13.02    0.32
  -2  -7   3   13.01    0.32
  -2   7   3   13.59    0.34
   2   7  -3   13.36    0.38
  -2   7   3   13.55    0.33
   2   7  -3   12.98    0.31
   2   7  -3   13.21    0.35
   2   7  -3   13.39    0.40
   2   7  -3   13.43    0.32
   2   7  -3   12.99    0.36
   1  -7  -3    0.05    0.03
  -1  -7   3    0.06    0.02
   1  -7  -3    0.07    0.04
  -1  -7   3   -0.02    0.05
   1  -7  -3    0.02    0.03
   1  -7  -3    0.02    0.06
  -1  -7   3    0.04    0.02
   1   7  -3    0.02    0.05
  -1   7   3    0.10    0.07
  -1   7   3    0.07    0.02
  -1   7   3    0.13    0.05
  -1   7   3    0.14    0.08
   1   7  -3    0.00    0.05
  -1   7   3    0.03    0.03
   1   7  -3    0.08    0.06
   1   7  -3    0.05    0.09
   1   7  -3    0.02    0.04
   0  -7   3   31.62    0.74
   0  -7  -3   32.46    0.75
   0  -7   3   32.83    0.83
   0  -7  -3   32.91    0.75
   0  -7   3   32.84    0.79
   0  -7   3   33.95    0.74
   0  -7  -3   33.54    0.80
   0   7   3   31.82    0.74
   0   7   3   33.78    0.75
   0   7   3   33.33    0.82
   0   7   3   32.91    0.81
   0   7  -3   33.43    0.80
   0   7   3   34.01    0.80
   0   7  -3   33.12    0.81
   0   7  -3   34.04    0.83
   0   7  -3   34.24    0.81
  -1  -7  -3    0.06    0.02
   1  -7   3    0.07    0.06
   1  -7   3    0.03    0.03
   1  -7   3    0.02    0.06
   1  -7   3    0.12    0.06
  -1  -7  -3    0.08    0.07
   1  -7   3    0.04    0.03
  -1  -7  -3    0.01    0.02
  -1  -7  -3    0.10    0.05
   1   7   3    0.05    0.02
   1   7   3    0.06    0.02
   1   7   3    0.16    0.05
  -1   7  -3    0.03    0.02
   1   7   3   -0.01    0.06
  -1   7  -3    0.05    0.09
   1   7   3    0.08    0.07
   1   7   3    0.09    0.05
  -1   7  -3    0.06    0.03
  -1   7  -3    0.04    0.05
  -2  -7  -3    0.44    0.10
   2  -7   3    0.36    0.08
   2  -7   3    0.36    0.04
   2  -7   3    0.24    0.07
   2  -7   3    0.25    0.05
   2   7   3    0.29    0.05
  -2   7  -3    0.19    0.09
   2   7   3    0.23    0.04
  -2   7  -3    0.33    0.04
   2   7   3    0.29    0.07
  -2   7  -3    0.30    0.04
   2   7   3    0.34    0.07
   2   7   3    0.30    0.04
   3  -7   3    9.28    0.26
   3  -7   3    9.33    0.31
   3  -7   3    9.34    0.27
  -3  -7  -3    9.12    0.25
  -3  -7  -3    9.23    0.26
  -3  -7  -3    9.31    0.30
  -3  -7  -3    9.06    0.25
   3  -7   3    8.94    0.28
   3   7   3    9.19    0.25
   3   7   3    9.22    0.24
   3   7   3    8.91    0.24
   3   7   3    8.94    0.28
  -3   7  -3    9.27    0.26
  -3   7  -3    9.15    0.25
  -4  -7  -3   -0.04    0.05
   4  -7   3    0.05    0.06
   4  -7   3   -0.05    0.07
   4  -7   3   -0.02    0.06
   4  -7   3   -0.04    0.06
  -4  -7  -3    0.02    0.06
  -4  -7  -3   -0.06    0.08
   4   7   3   -0.02    0.09
   4   7   3   -0.06    0.05
   4   7   3    0.03    0.06
  -4   7  -3   -0.05    0.05
  -4   7  -3   -0.04    0.05
  -5  -7  -3    0.08    0.09
   5  -7   3    0.14    0.07
   5  -7   3    0.13    0.08
  -5  -7  -3    0.10    0.07
   5  -7   3    0.12    0.08
  -5  -7  -3    0.09    0.07
  -5  -7  -3    0.04    0.07
   5   7   3    0.17    0.07
   5   7   3    0.12    0.09
  -5   7  -3    0.19    0.07
   5   7   3    0.06    0.08
  -5   7  -3    0.16    0.08
   6  -7   3    0.32    0.11
  -6  -7  -3    0.37    0.09
   6  -7   3    0.32    0.11
  -6  -7  -3    0.34    0.09
   6  -7   3    0.40    0.11
  -6  -7  -3    0.46    0.09
   6   7   3    0.47    0.10
   6   7   3    0.30    0.09
  -6   7  -3    0.38    0.10
  -6   7  -3    0.34    0.10
  -7  -7  -3    2.02    0.19
   7  -7   3    2.63    0.23
  -7  -7  -3    2.14    0.17
   7  -7   3    1.77    0.19
   7  -7   3    1.99    0.20
  -7  -7  -3    1.70    0.18
   7   7   3    2.17    0.24
   7   7   3    1.90    0.18
  -7   7  -3    1.91    0.21
  -7   7  -3    2.14    0.21
   8  -7   3    0.56    0.16
   8  -7   3    0.58    0.16
  -8  -7  -3    0.34    0.14
   8  -7   3    0.57    0.14
  -8  -7  -3    0.83    0.12
  -8  -7  -3    0.51    0.14
  -8   7  -3    0.51    0.15
   8   7   3    0.46    0.14
   8   7   3    0.55    0.17
  -8   7  -3    0.46    0.15
  -9  -7  -3    0.13    0.16
  -9  -7  -3    0.06    0.16
   9  -7   3    0.06    0.15
   9  -7   3   -0.23    0.20
  -9   7  -3    0.27    0.19
   9   7   3    0.03    0.17
  -9   7  -3   -0.07    0.13
   9   7   3    0.08    0.15
  10  -7   3    0.08    0.17
 -10  -7  -3    0.18    0.18
 -10  -7  -3    0.27    0.21
 -10   7  -3   -0.01    0.23
  10   7   3   -0.24    0.18
 -10   7  -3    0.01    0.19
  10   7   3   -0.13    0.20
  11  -7   3    0.39    0.22
  11  -7   3    0.24    0.31
 -11  -7  -3    0.09    0.20
  11   7   3    0.17    0.19
  11   7   3    0.19    0.29
 -11   7  -3    0.08    0.32
 -11   7  -3    0.17    0.12
 -11  -8   3    0.46    0.31
 -11  -8   3    0.49    0.25
  11  -8  -3    0.61    0.32
  11  -8  -3    0.27    0.23
  11   8  -3    0.26    0.17
 -11   8   3    0.85    0.39
  10  -8  -3    0.17    0.31
 -10  -8   3    0.18    0.26
 -10  -8   3   -0.07    0.19
 -10  -8   3   -0.35    0.19
  10  -8  -3   -0.17    0.19
 -10   8   3   -0.19    0.16
  10   8  -3   -0.46    0.20
 -10   8   3   -0.19    0.24
  10   8  -3    0.06    0.19
   9  -8  -3    0.48    0.19
  -9  -8   3    0.20    0.18
  -9  -8   3    0.04    0.17
  -9  -8   3    0.58    0.16
   9  -8  -3    0.04    0.16
  -9   8   3    0.31    0.18
  -9   8   3    0.48    0.17
   9   8  -3    0.16    0.26
   9   8  -3   -0.12    0.15
  -8  -8   3    0.03    0.14
  -8  -8   3    0.41    0.17
   8  -8  -3   -0.10    0.14
  -8  -8   3   -0.04    0.12
   8  -8  -3   -0.07    0.15
  -8  -8   3   -0.08    0.13
   8  -8  -3   -0.02    0.15
  -8   8   3   -0.04    0.13
   8   8  -3   -0.07    0.15
   8   8  -3   -0.18    0.12
  -8   8   3    0.27    0.14
   7  -8  -3    4.16    0.22
   7  -8  -3    4.50    0.26
   7  -8  -3    4.56    0.27
  -7  -8   3    4.52    0.23
  -7  -8   3    4.28    0.24
  -7  -8   3    4.74    0.25
  -7  -8   3    4.46    0.23
   7  -8  -3    3.95    0.25
   7   8  -3    4.50    0.28
  -7   8   3    4.47    0.24
   7   8  -3    4.11    0.22
  -7   8   3    4.29    0.25
  -6  -8   3    0.16    0.10
   6  -8  -3    0.00    0.09
   6  -8  -3    0.03    0.11
   6  -8  -3    0.07    0.08
  -6  -8   3    0.12    0.09
   6  -8  -3    0.08    0.11
  -6  -8   3    0.14    0.11
  -6  -8   3    0.03    0.08
   6   8  -3   -0.02    0.08
   6   8  -3    0.11    0.09
   6   8  -3    0.15    0.08
  -6   8   3    0.10    0.10
  -6   8   3   -0.02    0.08
  -5  -8   3    1.02    0.13
  -5  -8   3    0.98    0.10
   5  -8  -3    1.01    0.15
  -5  -8   3    1.10    0.14
   5  -8  -3    0.84    0.13
   5  -8  -3    0.96    0.12
   5  -8  -3    0.71    0.10
   5   8  -3    1.13    0.15
  -5   8   3    0.80    0.11
   5   8  -3    0.88    0.11
  -5   8   3    0.77    0.10
   5   8  -3    0.91    0.10
   4  -8  -3    0.02    0.06
  -4  -8   3    0.03    0.09
   4  -8  -3    0.06    0.07
   4  -8  -3   -0.08    0.06
  -4  -8   3    0.03    0.09
  -4  -8   3    0.02    0.05
   4  -8  -3    0.09    0.08
  -4  -8   3   -0.02    0.05
  -4   8   3   -0.06    0.06
   4   8  -3    0.02    0.05
   4   8  -3   -0.03    0.05
   4   8  -3   -0.09    0.08
  -4   8   3    0.09    0.05
   4   8  -3    0.02    0.07
  -3  -8   3    2.17    0.10
  -3  -8   3    2.01    0.14
   3  -8  -3    2.31    0.12
   3  -8  -3    2.17    0.11
   3  -8  -3    2.21    0.14
  -3  -8   3    2.06    0.09
   3  -8  -3    2.06    0.14
  -3   8   3    1.96    0.11
   3   8  -3    2.22    0.16
   3   8  -3    2.10    0.17
   3   8  -3    1.98    0.09
   3   8  -3    1.96    0.09
  -3   8   3    2.12    0.10
  -2  -8   3    6.94    0.17
   2  -8  -3    6.83    0.25
   2  -8  -3    6.92    0.20
  -2  -8   3    6.87    0.17
   2  -8  -3    6.98    0.21
  -2  -8   3    7.13    0.24
   2  -8  -3    7.18    0.25
   2   8  -3    6.72    0.17
  -2   8   3    6.83    0.26
   2   8  -3    6.76    0.26
   2   8  -3    7.06    0.24
  -2   8   3    7.02    0.19
   2   8  -3    6.86    0.24
  -2   8   3    6.90    0.20
   2   8  -3    7.09    0.23
   1  -8  -3    2.68    0.09
   1  -8  -3    2.56    0.14
   1  -8  -3    2.57    0.09
  -1  -8   3    2.56    0.15
   1  -8  -3    2.39    0.14
   1   8  -3    2.57    0.14
  -1   8   3    2.67    0.09
  -1   8   3    2.66    0.16
  -1   8   3    2.76    0.19
  -1   8   3    2.65    0.08
   1   8  -3    2.57    0.13
  -1   8   3    2.93    0.14
   1   8  -3    2.58    0.15
   0  -8  -3    2.06    0.13
   0  -8  -3    2.04    0.07
   0  -8   3    2.17    0.14
   0  -8   3    1.95    0.12
   0  -8  -3    2.17    0.07
   0   8   3    2.20    0.13
   0   8   3    2.08    0.15
   0   8   3    2.22    0.12
   0   8  -3    1.76    0.18
   0   8  -3    2.11    0.13
   0   8   3    2.04    0.06
   0   8  -3    2.08    0.13
   0   8  -3    2.15    0.14
   0   8   3    2.12    0.14
  -1  -8  -3    3.00    0.15
  -1  -8  -3    2.96    0.09
  -1  -8  -3    2.98    0.16
   1  -8   3    2.91    0.15
   1  -8   3    2.90    0.09
   1  -8   3    3.13    0.10
   1  -8   3    3.32    0.17
  -1  -8  -3    3.00    0.09
   1   8   3    3.06    0.17
  -1   8  -3    3.12    0.18
  -1   8  -3    2.92    0.09
   1   8   3    3.04    0.16
   1   8   3    3.08    0.15
   1   8   3    2.84    0.13
   1   8   3    3.06    0.12
  -1   8  -3    2.96    0.09
   1   8   3    2.96    0.08
   2  -8   3    6.38    0.23
   2  -8   3    6.80    0.25
   2  -8   3    6.51    0.18
   2  -8   3    6.28    0.22
  -2  -8  -3    6.54    0.18
  -2  -8  -3    6.50    0.17
  -2  -8  -3    6.43    0.25
   2   8   3    6.41    0.17
  -2   8  -3    6.41    0.18
   2   8   3    6.52    0.24
   2   8   3    6.71    0.20
   2   8   3    6.53    0.17
  -2   8  -3    6.60    0.18
  -2   8  -3    6.05    0.24
  -3  -8  -3    0.06    0.06
   3  -8   3    0.08    0.05
   3  -8   3    0.19    0.08
   3  -8   3    0.15    0.06
  -3  -8  -3    0.12    0.05
  -3  -8  -3    0.32    0.10
   3  -8   3    0.18    0.08
   3   8   3    0.11    0.05
  -3   8  -3    0.18    0.05
   3   8   3    0.13    0.08
   3   8   3    0.12    0.04
   3   8   3    0.14    0.07
  -3   8  -3    0.16    0.05
   3   8   3    0.16    0.06
  -4  -8  -3    2.08    0.13
   4  -8   3    1.68    0.15
  -4  -8  -3    1.53    0.11
  -4  -8  -3    1.70    0.17
   4  -8   3    1.82    0.13
  -4  -8  -3    1.82    0.12
   4  -8   3    1.78    0.14
   4  -8   3    1.68    0.15
  -4   8  -3    1.80    0.11
   4   8   3    1.75    0.12
  -4   8  -3    1.73    0.12
   4   8   3    1.77    0.15
   4   8   3    1.65    0.10
  -5  -8  -3    4.51    0.19
  -5  -8  -3    4.63    0.19
   5  -8   3    4.52    0.22
   5  -8   3    4.73    0.21
   5  -8   3    4.64    0.21
  -5  -8  -3    4.51    0.18
   5  -8   3    4.25    0.22
  -5  -8  -3    4.73    0.24
   5   8   3    4.43    0.24
   5   8   3    4.50    0.19
  -5   8  -3    4.50    0.20
   5   8   3    4.35    0.18
  -5   8  -3    4.35    0.19
  -6  -8  -3    1.62    0.15
   6  -8   3    1.40    0.18
   6  -8   3    1.44    0.17
  -6  -8  -3    1.39    0.14
   6  -8   3    1.58    0.18
  -6  -8  -3    1.21    0.15
  -6  -8  -3    1.39    0.16
   6   8   3    1.58    0.15
  -6   8  -3    1.39    0.17
  -6   8  -3    1.64    0.18
   6   8   3    1.51    0.14
   6   8   3    1.57    0.17
  -7  -8  -3    7.30    0.32
  -7  -8  -3    7.98    0.28
   7  -8   3    7.64    0.32
   7  -8   3    8.12    0.34
  -7  -8  -3    7.88    0.30
  -7  -8  -3    7.97    0.31
   7  -8   3    7.98    0.32
   7   8   3    8.13    0.31
   7   8   3    8.23    0.30
  -7   8  -3    8.01    0.32
   7   8   3    8.52    0.33
  -8  -8  -3   -0.12    0.11
   8  -8   3   -0.08    0.16
  -8  -8  -3    0.08    0.13
   8  -8   3    0.11    0.14
  -8  -8  -3    0.09    0.14
  -8  -8  -3    0.04    0.17
  -8   8  -3   -0.14    0.11
  -8   8  -3    0.14    0.15
   8   8   3   -0.13    0.14
   8   8   3   -0.12    0.13
   8   8   3   -0.23    0.14
   9  -8   3    0.14    0.17
  -9  -8  -3    0.12    0.22
  -9  -8  -3   -0.02    0.17
   9  -8   3    0.05    0.21
   9   8   3    0.54    0.17
  -9   8  -3    0.18    0.15
  -9   8  -3    0.18    0.19
   9   8   3   -0.11    0.18
   9   8   3   -0.07    0.17
 -10  -8  -3    0.05    0.19
  10  -8   3    0.16    0.20
  10  -8   3   -0.14    0.45
 -10  -8  -3   -0.05    0.20
  10   8   3   -0.25    0.21
 -10   8  -3    0.22    0.17
  10   8   3    0.26    0.22
  10   8   3   -0.26    0.21
 -10   8  -3    0.23    0.25
  11  -8   3    0.60    0.25
 -11  -8  -3    0.41    0.31
 -11  -8  -3   -0.39    0.23
  11  -8   3   -0.59    0.31
 -11  -9   3   -0.10    0.25
  11  -9  -3    0.16    0.27
  11  -9  -3   -0.17    0.32
 -11   9   3   -0.19    0.25
  10  -9  -3    0.32    0.31
  10  -9  -3   -0.09    0.15
  10  -9  -3    0.01    0.20
 -10  -9   3    0.26    0.21
 -10  -9   3   -0.11    0.22
  10   9  -3   -0.02    0.21
 -10   9   3    0.64    0.27
 -10   9   3   -0.10    0.17
   9  -9  -3   -0.08    0.20
  -9  -9   3    0.12    0.17
  -9  -9   3    0.01    0.21
  -9  -9   3   -0.07    0.16
   9  -9  -3    0.27    0.13
   9  -9  -3   -0.02    0.18
  -9   9   3   -0.23    0.19
  -9   9   3   -0.33    0.15
   9   9  -3   -0.14    0.17
   9   9  -3   -0.04    0.17
  -8  -9   3    0.12    0.16
   8  -9  -3    0.06    0.19
  -8  -9   3    0.16    0.13
  -8  -9   3   -0.03    0.18
   8  -9  -3   -0.06    0.16
  -8  -9   3    0.10    0.15
   8  -9  -3    0.03    0.16
   8  -9  -3    0.02    0.11
   8   9  -3   -0.12    0.14
   8   9  -3   -0.07    0.14
  -8   9   3   -0.10    0.13
  -8   9   3    0.38    0.16
  -7  -9   3    0.23    0.13
   7  -9  -3    0.04    0.14
   7  -9  -3    0.16    0.13
  -7  -9   3    0.10    0.11
  -7  -9   3   -0.01    0.15
  -7  -9   3    0.28    0.18
   7  -9  -3   -0.03    0.12
   7  -9  -3    0.09    0.10
   7   9  -3   -0.01    0.10
   7   9  -3    0.14    0.13
  -7   9   3    0.03    0.12
  -7   9   3    0.04    0.13
   7   9  -3    0.08    0.14
  -6  -9   3   -0.07    0.13
  -6  -9   3    0.07    0.08
   6  -9  -3    0.10    0.11
  -6  -9   3    0.03    0.09
   6  -9  -3    0.23    0.12
  -6  -9   3    0.12    0.13
   6  -9  -3    0.09    0.08
   6  -9  -3    0.06    0.10
   6   9  -3    0.10    0.08
   6   9  -3    0.21    0.09
  -6   9   3    0.12    0.10
  -6   9   3    0.18    0.12
   6   9  -3    0.17    0.12
   6   9  -3    0.11    0.12
  -5  -9   3    2.03    0.20
   5  -9  -3    1.70    0.16
  -5  -9   3    2.06    0.13
   5  -9  -3    1.83    0.19
  -5  -9   3    1.92    0.17
  -5  -9   3    1.89    0.14
   5  -9  -3    1.96    0.16
   5  -9  -3    1.53    0.15
  -5   9   3    2.14    0.14
   5   9  -3    1.70    0.21
  -5   9   3    1.96    0.15
   5   9  -3    1.87    0.13
   5   9  -3    2.21    0.18
   5   9  -3    2.06    0.13
  -4  -9   3    0.74    0.12
  -4  -9   3    0.66    0.09
   4  -9  -3    0.67    0.12
   4  -9  -3    0.71    0.09
  -4  -9   3    0.72    0.12
   4  -9  -3    0.57    0.10
   4  -9  -3    0.67    0.15
  -4   9   3    0.72    0.08
   4   9  -3    0.73    0.12
   4   9  -3    0.40    0.12
  -4   9   3    0.64    0.09
   4   9  -3    0.64    0.08
   4   9  -3    0.65    0.07
   4   9  -3    0.66    0.10
   3  -9  -3    1.71    0.12
   3  -9  -3    1.63    0.11
  -3  -9   3    1.58    0.16
  -3  -9   3    1.67    0.08
   3  -9  -3    1.63    0.14
  -3  -9   3    1.64    0.08
   3  -9  -3    1.48    0.14
   3   9  -3    1.54    0.17
   3   9  -3    1.57    0.07
  -3   9   3    1.58    0.11
   3   9  -3    1.84    0.16
   3   9  -3    1.70    0.13
  -3   9   3    1.53    0.09
   3   9  -3    1.61    0.07
   2  -9  -3    0.49    0.06
   2  -9  -3    0.54    0.07
   2  -9  -3    0.71    0.11
   2  -9  -3    0.65    0.11
  -2   9   3    0.66    0.06
   2   9  -3    0.58    0.10
  -2   9   3    0.51    0.12
   2   9  -3    0.61    0.10
   2   9  -3    0.55    0.11
   2   9  -3    0.71    0.10
  -2   9   3    0.70    0.07
   1  -9  -3    2.21    0.15
   1  -9  -3    2.10    0.14
   1  -9  -3    1.93    0.08
   1  -9  -3    1.95    0.07
  -1  -9   3    1.88    0.14
   1   9  -3    1.91    0.14
  -1   9   3    2.02    0.15
   1   9  -3    1.92    0.15
  -1   9   3    2.07    0.16
   1   9  -3    2.14    0.14
  -1   9   3    1.94    0.13
   1   9  -3    2.22    0.14
   1   9  -3    1.83    0.15
  -1   9   3    1.90    0.06
   0  -9   3    1.20    0.12
   0  -9   3    1.15    0.13
   0  -9  -3    1.35    0.13
   0   9   3    1.18    0.13
   0   9   3    1.19    0.15
   0   9  -3    1.27    0.13
   0   9  -3    1.48    0.13
   0   9  -3    1.04    0.13
   0   9   3    1.44    0.12
   0   9  -3    1.25    0.14
  -1  -9  -3    0.30    0.07
   1  -9   3    0.21    0.08
   1  -9   3    0.28    0.03
   1  -9   3    0.28    0.08
   1  -9   3    0.28    0.03
  -1   9  -3    0.41    0.11
   1   9   3    0.25    0.07
   1   9   3    0.19    0.07
  -1   9  -3    0.18    0.09
   1   9   3    0.26    0.10
  -1   9  -3    0.37    0.08
   1   9   3    0.27    0.09
   1   9   3    0.30    0.06
  -1   9  -3    0.24    0.02
   2  -9   3    0.00    0.04
  -2  -9  -3   -0.02    0.03
   2  -9   3    0.03    0.08
   2  -9   3    0.00    0.06
  -2  -9  -3    0.01    0.02
  -2  -9  -3    0.06    0.09
   2  -9   3    0.00    0.04
   2  -9   3    0.06    0.07
  -2   9  -3    0.07    0.04
  -2   9  -3    0.00    0.04
  -2   9  -3   -0.09    0.09
   2   9   3    0.03    0.03
   2   9   3    0.04    0.06
   2   9   3   -0.04    0.06
   2   9   3    0.07    0.09
   3  -9   3    0.09    0.10
  -3  -9  -3    0.22    0.11
   3  -9   3    0.07    0.06
   3  -9   3   -0.09    0.07
   3  -9   3    0.07    0.08
  -3  -9  -3    0.06    0.05
   3   9   3    0.05    0.06
  -3   9  -3    0.09    0.05
   3   9   3    0.04    0.07
   3   9   3   -0.03    0.04
  -3   9  -3    0.03    0.05
   3   9   3    0.10    0.05
   3   9   3    0.16    0.11
   4  -9   3    7.28    0.28
  -4  -9  -3    7.04    0.22
  -4  -9  -3    7.23    0.22
   4  -9   3    6.97    0.29
  -4  -9  -3    6.78    0.28
  -4  -9  -3    7.22    0.25
   4  -9   3    6.84    0.27
   4  -9   3    7.16    0.24
  -4   9  -3    6.93    0.23
   4   9   3    6.95    0.21
   4   9   3    7.00    0.22
   4   9   3    6.57    0.27
  -4   9  -3    7.10    0.23
   4   9   3    7.22    0.30
   5  -9   3    2.11    0.16
  -5  -9  -3    1.80    0.14
   5  -9   3    2.35    0.17
   5  -9   3    2.06    0.19
   5  -9   3    2.14    0.18
  -5  -9  -3    2.34    0.17
  -5  -9  -3    2.39    0.22
  -5   9  -3    2.07    0.16
   5   9   3    1.98    0.15
   5   9   3    2.04    0.13
  -5   9  -3    2.02    0.14
   5   9   3    2.03    0.19
  -6  -9  -3    2.46    0.26
   6  -9   3    3.06    0.21
  -6  -9  -3    2.81    0.18
  -6  -9  -3    2.80    0.19
   6  -9   3    2.98    0.22
   6  -9   3    3.07    0.30
  -6  -9  -3    2.48    0.18
   6  -9   3    2.46    0.20
  -6   9  -3    2.87    0.19
  -6   9  -3    3.14    0.22
   6   9   3    2.88    0.23
   6   9   3    3.19    0.20
   6   9   3    2.53    0.16
   7  -9   3    1.28    0.18
  -7  -9  -3    1.07    0.20
  -7  -9  -3    1.43    0.15
   7  -9   3    1.27    0.18
  -7  -9  -3    1.34    0.15
   7  -9   3    1.39    0.18
  -7  -9  -3    1.34    0.17
   7  -9   3    1.17    0.17
   7   9   3    1.22    0.19
  -7   9  -3    1.42    0.17
  -7   9  -3    1.09    0.16
   7   9   3    1.39    0.18
   7   9   3    1.28    0.19
   8  -9   3    0.20    0.16
   8  -9   3    0.38    0.19
  -8  -9  -3    0.99    0.25
  -8  -9  -3    0.26    0.15
  -8  -9  -3    0.56    0.15
   8   9   3    0.32    0.16
   8   9   3    0.47    0.15
  -8   9  -3    0.29    0.17
   8   9   3    0.45    0.16
  -8   9  -3    0.47    0.15
  -9  -9  -3   -0.18    0.17
  -9  -9  -3    0.19    0.18
   9  -9   3    0.20    0.22
   9  -9   3    0.09    0.19
   9   9   3   -0.05    0.19
   9   9   3    0.06    0.18
  -9   9  -3   -0.09    0.16
   9   9   3    0.11    0.18
  -9   9  -3   -0.11    0.20
  10  -9   3   -0.54    0.32
 -10  -9  -3    0.18    0.21
 -10  -9  -3   -0.34    0.20
  10  -9   3    0.00    0.21
 -10   9  -3   -0.09    0.23
 -10   9  -3    0.11    0.12
  10   9   3    0.43    0.23
  11  -9   3    0.14    0.25
 -11  -9  -3   -0.07    0.24
  11  -9   3    0.24    0.36
 -11   9  -3    0.02    0.29
  11   9   3   -0.34    0.23
  10 -10  -3   -0.01    0.23
 -10 -10   3    0.20    0.21
  10 -10  -3   -0.79    0.38
  10 -10  -3   -0.13    0.18
  10  10  -3   -0.03    0.21
   9 -10  -3   -0.24    0.21
   9 -10  -3    0.11    0.15
  -9 -10   3   -0.08    0.28
  -9 -10   3    0.04    0.17
  -9 -10   3    0.13    0.21
   9 -10  -3   -0.07    0.20
  -9  10   3    0.88    0.23
  -9  10   3   -0.28    0.16
   9  10  -3    0.09    0.18
   9  10  -3    0.02    0.18
   8 -10  -3    0.09    0.17
   8 -10  -3   -0.27    0.18
  -8 -10   3    0.09    0.21
  -8 -10   3    0.09    0.18
  -8 -10   3    0.03    0.13
   8  10  -3   -0.09    0.14
   8  10  -3   -0.06    0.14
   8  10  -3   -0.05    0.13
  -8  10   3    0.12    0.14
  -7 -10   3    0.53    0.20
  -7 -10   3    0.59    0.19
  -7 -10   3    0.47    0.13
  -7 -10   3    0.45    0.12
   7 -10  -3    0.51    0.15
   7 -10  -3    0.55    0.16
   7 -10  -3    0.41    0.16
   7 -10  -3    0.51    0.13
   7  10  -3    0.59    0.15
  -7  10   3    0.62    0.14
  -7  10   3    0.57    0.15
   7  10  -3    0.69    0.13
   7  10  -3    0.37    0.16
   7  10  -3    0.60    0.12
   6 -10  -3   -0.02    0.10
   6 -10  -3    0.03    0.12
  -6 -10   3    0.03    0.15
  -6 -10   3    0.01    0.09
   6 -10  -3   -0.05    0.13
   6 -10  -3   -0.06    0.12
  -6 -10   3    0.07    0.18
   6  10  -3    0.05    0.10
   6  10  -3   -0.12    0.08
   6  10  -3   -0.11    0.14
  -6  10   3    0.00    0.11
   6  10  -3    0.22    0.13
  -6  10   3   -0.06    0.11
   5 -10  -3    0.09    0.10
  -5 -10   3    0.21    0.13
  -5 -10   3    0.03    0.06
   5 -10  -3    0.22    0.10
  -5 -10   3    0.19    0.14
   5 -10  -3    0.11    0.09
   5 -10  -3   -0.02    0.12
  -5 -10   3   -0.02    0.07
  -5  10   3    0.13    0.09
   5  10  -3    0.02    0.06
   5  10  -3    0.01    0.07
   5  10  -3   -0.13    0.11
   5  10  -3   -0.05    0.12
  -5  10   3    0.19    0.08
  -4 -10   3    1.13    0.09
   4 -10  -3    1.21    0.16
   4 -10  -3    1.24    0.13
  -4 -10   3    1.52    0.17
   4 -10  -3    1.28    0.13
   4 -10  -3    1.34    0.15
  -4 -10   3    1.41    0.15
   4  10  -3    1.42    0.14
  -4  10   3    1.42    0.12
   4  10  -3    1.25    0.09
   4  10  -3    1.46    0.18
  -4  10   3    1.24    0.12
   4  10  -3    1.26    0.09
   4  10  -3    1.40    0.17
   3 -10  -3    0.62    0.11
   3 -10  -3    0.56    0.07
  -3 -10   3    0.54    0.05
   3 -10  -3    0.57    0.12
  -3 -10   3    0.48    0.06
   3 -10  -3    0.46    0.09
   3  10  -3    0.78    0.11
  -3  10   3    0.51    0.06
   3  10  -3    0.50    0.04
   3  10  -3    0.52    0.11
   3  10  -3    0.62    0.15
  -3  10   3    0.51    0.07
  -3  10   3    0.56    0.12
   2 -10  -3    1.98    0.09
   2 -10  -3    1.68    0.17
   2 -10  -3    1.86    0.09
   2 -10  -3    1.93    0.15
   2  10  -3    1.86    0.17
   2  10  -3    1.63    0.16
   2  10  -3    2.02    0.16
  -2  10   3    1.94    0.17
   2  10  -3    2.07    0.15
  -2  10   3    1.88    0.08
  -2  10   3    2.00    0.09
   2  10  -3    1.62    0.16
   1 -10  -3    1.19    0.06
   1 -10  -3    1.41    0.15
  -1 -10   3    1.29    0.14
   1 -10  -3    1.34    0.13
   1 -10  -3    1.27    0.06
  -1  10   3    1.54    0.17
  -1  10   3    1.29    0.14
   1  10  -3    1.45    0.15
  -1  10   3    1.40    0.17
   1  10  -3    1.31    0.16
   1  10  -3    1.31    0.14
   1  10  -3    1.43    0.15
   0 -10  -3   -0.04    0.07
   0 -10   3   -0.07    0.07
   0  10   3    0.04    0.10
   0  10  -3   -0.12    0.08
   0  10   3    0.09    0.09
   0  10  -3    0.06    0.10
   0  10  -3   -0.04    0.08
   0  10  -3    0.01    0.10
   0  10   3    0.00    0.06
   1 -10   3    3.44    0.20
  -1 -10  -3    3.19    0.18
   1 -10   3    3.25    0.19
   1  10   3    3.12    0.17
  -1  10  -3    3.96    0.20
  -1  10  -3    3.00    0.19
   1  10   3    3.48    0.20
  -1  10  -3    2.88    0.20
  -1  10  -3    3.10    0.20
   1  10   3    3.66    0.20
   1  10   3    3.08    0.20
   2 -10   3    0.29    0.09
   2 -10   3    0.01    0.09
   2 -10   3    0.12    0.05
  -2 -10  -3    0.11    0.11
   2 -10   3    0.15    0.04
  -2 -10  -3    0.21    0.03
  -2 -10  -3    0.16    0.03
   2 -10   3    0.15    0.09
   2  10   3    0.06    0.10
   2  10   3    0.24    0.08
  -2  10  -3    0.13    0.03
  -2  10  -3    0.19    0.11
  -2  10  -3    0.15    0.04
   2  10   3    0.23    0.09
   3 -10   3   -0.04    0.10
   3 -10   3    0.14    0.06
  -3 -10  -3    0.21    0.13
   3 -10   3   -0.07    0.08
   3 -10   3    0.20    0.10
   3 -10   3    0.07    0.10
  -3 -10  -3    0.14    0.05
  -3 -10  -3    0.11    0.04
   3  10   3    0.13    0.08
   3  10   3    0.16    0.04
  -3  10  -3    0.10    0.05
   3  10   3    0.12    0.09
   3  10   3    0.07    0.05
   3  10   3    0.21    0.12
  -3  10  -3    0.15    0.06
   4 -10   3    0.63    0.14
  -4 -10  -3    0.56    0.17
   4 -10   3    0.63    0.10
   4 -10   3    0.61    0.09
   4 -10   3    0.78    0.14
  -4 -10  -3    0.54    0.07
  -4  10  -3    0.58    0.08
   4  10   3    0.62    0.08
   4  10   3    0.60    0.07
  -4  10  -3    0.57    0.08
   4  10   3    0.66    0.14
   4  10   3    0.56    0.13
   5 -10   3    2.35    0.20
  -5 -10  -3    2.22    0.15
  -5 -10  -3    2.21    0.15
  -5 -10  -3    2.28    0.19
   5 -10   3    2.07    0.21
   5 -10   3    2.21    0.18
  -5 -10  -3    2.33    0.25
   5 -10   3    2.00    0.17
  -5  10  -3    2.31    0.17
  -5  10  -3    2.15    0.16
   5  10   3    2.23    0.15
   5  10   3    2.13    0.22
   5  10   3    2.23    0.13
   5  10   3    2.03    0.21
   6 -10   3    0.08    0.14
   6 -10   3    0.03    0.11
  -6 -10  -3    0.24    0.17
  -6 -10  -3    0.21    0.10
  -6 -10  -3    0.23    0.13
   6 -10   3    0.14    0.13
  -6 -10  -3    0.09    0.10
   6  10   3    0.10    0.13
  -6  10  -3    0.20    0.12
  -6  10  -3    0.19    0.11
   6  10   3    0.39    0.15
   6  10   3    0.05    0.08
   7 -10   3    2.15    0.25
   7 -10   3    1.91    0.21
  -7 -10  -3    2.16    0.20
   7 -10   3    1.68    0.19
  -7 -10  -3    2.09    0.21
  -7 -10  -3    1.98    0.21
   7 -10   3    2.40    0.24
  -7  10  -3    1.84    0.21
   7  10   3    2.28    0.27
   7  10   3    1.96    0.19
   7  10   3    1.87    0.19
  -7  10  -3    2.01    0.21
  -8 -10  -3    1.36    0.18
   8 -10   3    1.18    0.19
   8 -10   3    1.22    0.22
   8 -10   3    1.51    0.22
  -8 -10  -3    1.53    0.22
   8  10   3    1.02    0.16
   8  10   3    1.40    0.22
  -8  10  -3    1.21    0.18
   8  10   3    1.20    0.19
   9 -10   3    0.12    0.22
   9 -10   3   -0.02    0.20
  -9 -10  -3    0.31    0.18
   9 -10   3    0.08    0.16
  -9  10  -3    0.01    0.23
   9  10   3    0.26    0.18
   9  10   3    0.10    0.19
  -9  10  -3   -0.11    0.18
   9  10   3    0.27    0.15
  10 -10   3    0.16    0.20
  10 -10   3   -0.20    0.23
  10 -10   3    0.22    0.33
 -10 -10  -3    0.22    0.23
  10  10   3    0.03    0.15
  10  10   3    0.07    0.29
  10 -11  -3    0.06    0.19
  10 -11  -3    1.25    0.44
 -10 -11   3    0.36    0.29
  10 -11  -3    0.69    0.29
  10  11  -3    0.12    0.15
   9 -11  -3    0.35    0.25
  -9 -11   3    0.24    0.28
  -9 -11   3    0.81    0.20
   9 -11  -3    0.45    0.17
   9 -11  -3    0.59    0.23
  -9  11   3    0.06    0.19
   9  11  -3    0.33    0.18
  -8 -11   3    0.12    0.13
   8 -11  -3   -0.22    0.18
   8 -11  -3    0.00    0.13
   8 -11  -3    0.06    0.19
  -8 -11   3    0.13    0.20
   8  11  -3    0.07    0.15
   8  11  -3   -0.01    0.14
  -8  11   3    0.11    0.20
  -8  11   3   -0.12    0.16
   7 -11  -3   -0.03    0.16
   7 -11  -3    0.01    0.22
   7 -11  -3    0.17    0.16
  -7 -11   3    0.00    0.22
  -7 -11   3    0.04    0.19
   7 -11  -3    0.19    0.15
  -7 -11   3    0.20    0.12
  -7 -11   3    0.19    0.13
  -7  11   3    0.25    0.13
  -7  11   3    0.11    0.15
   7  11  -3    0.09    0.11
   7  11  -3    0.02    0.17
   6 -11  -3    0.78    0.15
  -6 -11   3    1.49    0.23
  -6 -11   3    0.87    0.21
   6 -11  -3    1.11    0.18
  -6 -11   3    0.83    0.12
   6 -11  -3    0.86    0.15
  -6 -11   3    0.86    0.12
   6 -11  -3    1.19    0.18
   6  11  -3    0.94    0.11
  -6  11   3    1.12    0.23
   6  11  -3    0.65    0.19
   6  11  -3    0.97    0.13
   6  11  -3    0.87    0.12
  -6  11   3    1.03    0.14
   5 -11  -3    0.61    0.14
  -5 -11   3    0.60    0.08
   5 -11  -3    0.55    0.12
  -5 -11   3    0.57    0.19
   5 -11  -3    0.51    0.12
   5 -11  -3    0.53    0.11
  -5 -11   3    0.62    0.22
  -5 -11   3    0.65    0.09
   5  11  -3    0.52    0.11
  -5  11   3    0.49    0.11
   5  11  -3    0.50    0.07
  -5  11   3    0.65    0.10
   5  11  -3    0.95    0.15
   5  11  -3    0.71    0.17
  -4 -11   3    0.88    0.08
   4 -11  -3    1.11    0.17
   4 -11  -3    0.90    0.10
   4 -11  -3    1.04    0.25
   4 -11  -3    0.89    0.11
  -4 -11   3    0.87    0.16
   4  11  -3    0.68    0.16
   4  11  -3    0.85    0.07
  -4  11   3    1.08    0.12
   4  11  -3    1.06    0.14
   4  11  -3    0.86    0.16
  -4  11   3    0.91    0.10
   4  11  -3    0.98    0.07
   3 -11  -3    0.37    0.11
   3 -11  -3    0.56    0.07
   3 -11  -3    0.33    0.13
   3 -11  -3    0.34    0.10
   3 -11  -3    0.44    0.10
   3  11  -3    0.41    0.15
   3  11  -3    0.47    0.13
   3  11  -3    0.42    0.11
  -3  11   3    0.52    0.07
  -3  11   3    0.47    0.06
  -3  11   3    0.33    0.17
   2 -11  -3    0.25    0.05
   2 -11  -3    0.21    0.09
   2 -11  -3    0.46    0.05
   2 -11  -3    0.38    0.12
  -2  11   3    0.36    0.05
   2  11  -3    0.43    0.11
  -2  11   3    0.42    0.15
   2  11  -3    0.44    0.12
   2  11  -3    0.30    0.12
   2  11  -3    0.47    0.11
   2  11  -3    0.32    0.12
  -2  11   3    0.33    0.03
   1 -11  -3    1.09    0.14
   1 -11  -3    0.92    0.13
  -1  11   3    0.95    0.14
   1  11  -3    0.92    0.15
  -1  11   3    0.78    0.14
   1  11  -3    1.17    0.15
   1  11  -3    1.06    0.14
   1  11  -3    0.66    0.13
  -1  11   3    1.00    0.15
   0 -11   3    0.14    0.09
   0 -11  -3   -0.01    0.09
   0  11   3   -0.06    0.08
   0  11  -3    0.03    0.11
   0  11   3   -0.09    0.11
   0  11  -3    0.13    0.12
   0  11   3    0.02    0.12
   0  11   3    0.00    0.09
   0  11  -3   -0.02    0.09
   0  11  -3   -0.08    0.10
   1 -11   3    4.10    0.22
  -1 -11  -3    4.29    0.21
   1 -11   3    4.34    0.23
  -1  11  -3    3.89    0.24
  -1  11  -3    3.98    0.24
   1  11   3    4.12    0.22
   1  11   3    3.95    0.19
   1  11   3    3.97    0.26
  -1  11  -3    4.31    0.23
  -1  11  -3    4.09    0.23
   1  11   3    4.53    0.25
   2 -11   3    2.87    0.11
   2 -11   3    3.32    0.23
   2 -11   3    3.16    0.21
   2 -11   3    3.21    0.12
   2  11   3    3.10    0.17
  -2  11  -3    3.15    0.09
   2  11   3    3.28    0.24
  -2  11  -3    3.05    0.10
   2  11   3    3.45    0.17
   2  11   3    3.02    0.21
  -2  11  -3    2.83    0.22
   3 -11   3    7.28    0.29
  -3 -11  -3    6.75    0.19
  -3 -11  -3    6.55    0.18
  -3 -11  -3    6.32    0.31
   3 -11   3    7.11    0.30
   3 -11   3    6.81    0.21
   3 -11   3    7.11    0.32
   3 -11   3    6.77    0.22
   3  11   3    6.75    0.17
  -3  11  -3    7.03    0.20
   3  11   3    7.14    0.32
   3  11   3    6.78    0.24
  -3  11  -3    7.17    0.21
   3  11   3    7.27    0.31
   3  11   3    7.18    0.18
   4 -11   3    1.12    0.14
   4 -11   3    1.07    0.12
  -4 -11  -3    0.98    0.18
   4 -11   3    1.08    0.16
  -4 -11  -3    0.97    0.09
   4 -11   3    1.01    0.16
  -4 -11  -3    0.87    0.11
   4  11   3    1.08    0.18
   4  11   3    0.85    0.09
   4  11   3    1.05    0.10
  -4  11  -3    0.90    0.10
   4  11   3    1.41    0.20
  -4  11  -3    0.94    0.11
  -5 -11  -3    0.42    0.20
   5 -11   3    0.53    0.11
  -5 -11  -3   -0.03    0.11
   5 -11   3    0.29    0.12
   5 -11   3    0.49    0.17
  -5 -11  -3    0.37    0.09
   5  11   3    0.28    0.14
   5  11   3    0.23    0.13
   5  11   3    0.54    0.09
  -5  11  -3    0.30    0.10
   5  11   3    0.50    0.08
  -5  11  -3    0.58    0.12
   6 -11   3    0.27    0.16
   6 -11   3    0.17    0.13
  -6 -11  -3    0.39    0.11
   6 -11   3    0.38    0.15
  -6 -11  -3    0.38    0.11
  -6 -11  -3    0.39    0.14
   6 -11   3    0.09    0.13
  -6  11  -3    0.38    0.12
   6  11   3    0.54    0.16
   6  11   3    0.54    0.19
  -6  11  -3    0.20    0.17
   6  11   3    0.28    0.09
   6  11   3    0.78    0.18
  -7 -11  -3    0.58    0.15
   7 -11   3    0.69    0.19
  -7 -11  -3    0.68    0.19
  -7 -11  -3    0.90    0.14
   7 -11   3    0.38    0.18
   7 -11   3    0.46    0.16
   7 -11   3    0.51    0.15
   7  11   3    0.83    0.17
  -7  11  -3    0.86    0.16
  -7  11  -3    0.69    0.15
   7  11   3    0.53    0.19
   7  11   3    0.62    0.12
   8 -11   3   -0.14    0.20
   8 -11   3    0.40    0.22
  -8 -11  -3    0.51    0.22
  -8 -11  -3    0.24    0.15
   8 -11   3   -0.03    0.15
  -8  11  -3    0.26    0.16
   8  11   3    0.28    0.14
   8  11   3    0.05    0.16
  -8  11  -3    0.05    0.18
   9 -11   3    0.04    0.23
  -9 -11  -3    0.42    0.25
   9 -11   3    0.30    0.25
   9 -11   3    0.24    0.18
  -9  11  -3    0.00    0.18
   9  11   3   -0.09    0.27
   9  11   3   -0.05    0.20
  10 -11   3    0.12    0.22
  10 -11   3   -0.18    0.27
 -10 -11  -3    0.76    0.28
  10  11   3    0.18    0.16
   9 -12  -3    0.08    0.20
  -9 -12   3    0.10    0.24
   9 -12  -3    0.12    0.26
   9  12  -3    0.21    0.18
  -8 -12   3    0.19    0.24
   8 -12  -3    0.00    0.21
   8 -12  -3    0.06    0.21
   8 -12  -3   -0.18    0.15
   8  12  -3    0.24    0.16
  -8  12   3   -0.29    0.15
  -7 -12   3    0.34    0.12
  -7 -12   3    0.59    0.28
  -7 -12   3    0.30    0.20
   7 -12  -3    0.10    0.16
   7 -12  -3    0.04    0.18
  -7 -12   3   -0.01    0.13
   7 -12  -3    0.05    0.14
  -7  12   3    0.24    0.15
   7  12  -3    0.26    0.11
   7  12  -3   -0.02    0.15
  -7  12   3    0.12    0.16
  -6 -12   3   -0.03    0.20
  -6 -12   3    0.23    0.14
   6 -12  -3    0.15    0.25
   6 -12  -3   -0.19    0.13
   6 -12  -3    0.31    0.17
  -6 -12   3   -0.04    0.23
   6 -12  -3   -0.15    0.12
   6  12  -3    0.13    0.09
   6  12  -3   -0.24    0.21
   6  12  -3    0.20    0.08
  -6  12   3    0.17    0.12
  -6  12   3   -0.03    0.13
  -5 -12   3    0.90    0.11
  -5 -12   3    0.98    0.09
  -5 -12   3    0.98    0.21
   5 -12  -3    1.17    0.18
   5 -12  -3    1.13    0.20
   5 -12  -3    1.11    0.14
   5  12  -3    1.18    0.13
  -5  12   3    1.05    0.13
  -5  12   3    1.35    0.17
   5  12  -3    1.00    0.19
   5  12  -3    1.10    0.10
   5  12  -3    1.18    0.10
   4 -12  -3    0.19    0.12
  -4 -12   3    0.23    0.04
   4 -12  -3    0.39    0.13
   4 -12  -3    0.16    0.09
   4 -12  -3    0.21    0.09
   4 -12  -3    0.21    0.14
   4  12  -3    0.19    0.12
   4  12  -3    0.29    0.13
  -4  12   3    0.02    0.18
   4  12  -3    0.14    0.10
  -4  12   3    0.31    0.07
  -4  12   3    0.35    0.08
   3 -12  -3    0.14    0.07
   3 -12  -3    0.11    0.10
   3 -12  -3    0.09    0.06
   3 -12  -3    0.12    0.14
   3  12  -3    0.20    0.12
   3  12  -3    0.11    0.12
   3  12  -3    0.12    0.13
  -3  12   3    0.12    0.18
  -3  12   3    0.20    0.07
  -3  12   3    0.14    0.05
   3  12  -3    0.05    0.12
   2 -12  -3    0.03    0.10
   2  12  -3    0.22    0.12
   2  12  -3    0.22    0.11
   2  12  -3    0.51    0.16
  -2  12   3    0.00    0.16
   2  12  -3    0.17    0.12
   2  12  -3    0.12    0.13
   1 -12  -3   -0.08    0.10
  -1  12   3    0.13    0.11
   1  12  -3    0.02    0.11
   1  12  -3   -0.07    0.14
   1  12  -3   -0.04    0.12
   1  12  -3    0.36    0.12
  -1  12   3    0.05    0.11
  -1  12   3    0.14    0.18
   0 -12   3   -0.05    0.10
   0 -12  -3    0.12    0.11
   0  12   3    0.17    0.12
   0  12   3    0.16    0.19
   0  12  -3    0.41    0.15
   0  12  -3    0.01    0.14
   0  12  -3    0.30    0.13
   0  12  -3    0.50    0.14
   0  12   3    0.12    0.12
   0  12   3    0.31    0.14
   1 -12   3    0.76    0.14
  -1 -12  -3    0.79    0.13
   1 -12   3    0.90    0.14
   1  12   3    0.59    0.17
   1  12   3    0.87    0.20
  -1  12  -3    0.95    0.22
  -1  12  -3    0.84    0.17
  -1  12  -3    0.98    0.16
   1  12   3    0.73    0.13
   1  12   3    0.65    0.13
   2 -12   3    0.02    0.20
   2 -12   3   -0.19    0.09
  -2  12  -3   -0.10    0.18
   2  12   3    0.11    0.10
  -2  12  -3    0.04    0.15
   2  12   3    0.20    0.11
  -2  12  -3    0.02    0.14
   2  12   3   -0.14    0.14
   2  12   3   -0.02    0.09
   3 -12   3    0.78    0.15
   3 -12   3    0.67    0.07
   3 -12   3    0.89    0.16
   3 -12   3    0.69    0.08
   3  12   3    0.31    0.13
  -3  12  -3    0.64    0.07
   3  12   3    0.79    0.12
   3  12   3    0.52    0.15
   4 -12   3    0.56    0.10
  -4 -12  -3    0.48    0.05
   4 -12   3    0.41    0.16
   4 -12   3    0.59    0.15
   4 -12   3    0.51    0.16
  -4 -12  -3    0.41    0.20
  -4 -12  -3    0.36    0.07
  -4  12  -3    0.32    0.08
   4  12   3    0.52    0.06
   4  12   3    0.43    0.11
   4  12   3    0.36    0.17
   4  12   3    0.47    0.06
   4  12   3    0.30    0.14
  -4  12  -3    0.51    0.08
   5 -12   3    0.04    0.13
  -5 -12  -3    0.20    0.22
   5 -12   3   -0.24    0.18
   5 -12   3   -0.10    0.14
  -5 -12  -3    0.08    0.09
   5 -12   3   -0.05    0.10
   5  12   3    0.00    0.16
   5  12   3    0.04    0.08
  -5  12  -3    0.06    0.10
   5  12   3    0.36    0.16
   5  12   3    0.01    0.06
  -5  12  -3    0.21    0.11
   6 -12   3    0.50    0.16
  -6 -12  -3    0.39    0.11
  -6 -12  -3    0.26    0.11
   6 -12   3    0.63    0.19
   6 -12   3    0.59    0.14
   6 -12   3    0.43    0.19
   6  12   3    0.75    0.13
  -6  12  -3    0.64    0.15
  -6  12  -3    0.42    0.13
   6  12   3    0.52    0.16
   6  12   3    0.35    0.09
   7 -12   3    0.25    0.18
  -7 -12  -3    0.02    0.26
  -7 -12  -3    0.22    0.14
   7 -12   3    0.34    0.16
   7 -12   3    0.37    0.19
   7  12   3    0.18    0.09
  -7  12  -3    0.31    0.15
   7  12   3    0.11    0.11
  -7  12  -3    0.07    0.15
   7  12   3    0.09    0.15
   8 -12   3    0.14    0.21
   8 -12   3    0.02    0.22
   8 -12   3   -0.16    0.17
  -8  12  -3    0.27    0.16
   8  12   3   -0.17    0.28
   8  12   3    0.03    0.17
  -9 -12  -3    0.40    0.25
   9 -12   3   -0.10    0.20
   9 -12   3   -0.05    0.27
   9  12   3   -0.08    0.22
  -9  12  -3    0.20    0.16
  -9 -13   3    0.79    0.32
   9 -13  -3    0.18    0.21
   9 -13  -3    0.18    0.27
   9  13  -3    0.16    0.22
  -9  13   3   -0.29    0.13
  -8 -13   3    0.08    0.27
   8 -13  -3    0.39    0.20
   8 -13  -3    0.19    0.25
   8  13  -3    0.29    0.17
  -8  13   3    0.11    0.18
   7 -13  -3    0.06    0.23
   7 -13  -3   -0.15    0.17
  -7 -13   3    0.27    0.24
   7 -13  -3   -0.13    0.16
  -7 -13   3    0.03    0.15
  -7  13   3   -0.01    0.13
   7  13  -3    0.23    0.17
   7  13  -3    0.05    0.13
   6 -13  -3   -0.10    0.17
   6 -13  -3    0.12    0.16
  -6 -13   3   -0.09    0.19
   6 -13  -3   -0.24    0.15
  -6 -13   3    0.09    0.09
   6 -13  -3   -0.08    0.19
  -6 -13   3    0.18    0.10
  -6  13   3    0.03    0.12
   6  13  -3   -0.04    0.08
  -6  13   3   -0.20    0.11
   6  13  -3    0.03    0.08
   5 -13  -3    0.12    0.15
   5 -13  -3    0.29    0.11
   5 -13  -3    0.13    0.14
  -5 -13   3    0.06    0.06
  -5 -13   3    0.04    0.06
   5 -13  -3   -0.11    0.17
   5 -13  -3    0.05    0.12
  -5  13   3    0.09    0.20
  -5  13   3    0.30    0.11
   4 -13  -3    0.59    0.15
   4 -13  -3    0.53    0.17
   4 -13  -3    0.53    0.10
  -4  13   3    0.33    0.07
   4  13  -3   -0.04    0.21
   4  13  -3    0.45    0.20
   4  13  -3    0.12    0.14
  -4  13   3    0.42    0.19
  -4  13   3    0.40    0.08
   3 -13  -3    0.14    0.07
   3 -13  -3    0.41    0.07
   3 -13  -3    0.08    0.12
   3 -13  -3    0.49    0.17
  -3  13   3    0.28    0.04
   3  13  -3    0.43    0.09
   3  13  -3    0.23    0.14
   3  13  -3    0.31    0.20
  -3  13   3    0.25    0.06
  -3  13   3    0.30    0.20
   3  13  -3    0.49    0.15
   2 -13  -3    0.36    0.14
   2  13  -3    0.42    0.15
   2  13  -3    0.49    0.17
   2  13  -3    0.55    0.08
  -2  13   3    0.56    0.20
   2  13  -3    0.49    0.17
   1 -13  -3    0.73    0.16
  -1  13   3    0.55    0.19
   1  13  -3    0.76    0.18
   1  13  -3    0.55    0.09
  -1  13   3    0.54    0.15
   1  13  -3    0.37    0.14
  -1  13   3    0.57    0.16
   1  13  -3    0.56    0.16
   0 -13  -3   -0.04    0.11
   0 -13   3    0.16    0.12
   0  13   3    0.21    0.13
   0  13  -3    0.02    0.15
   0  13   3    0.01    0.09
   0  13   3    0.08    0.15
   0  13  -3   -0.03    0.19
   0  13   3    0.15    0.13
   0  13  -3   -0.03    0.09
   1 -13   3    0.38    0.13
   1 -13   3    0.39    0.13
   1  13   3    0.18    0.10
   1  13   3    0.35    0.14
  -1  13  -3    0.27    0.08
   1  13   3    0.56    0.15
  -1  13  -3    0.24    0.16
   1  13   3    0.57    0.18
   2 -13   3    0.02    0.11
   2 -13   3    0.23    0.13
  -2  13  -3   -0.04    0.18
   2  13   3   -0.08    0.12
   2  13   3   -0.07    0.12
  -2  13  -3    0.03    0.07
  -2  13  -3    0.02    0.19
   2  13   3   -0.01    0.10
   3 -13   3    0.73    0.16
   3 -13   3    0.61    0.17
   3 -13   3    0.49    0.07
   3 -13   3    0.46    0.07
  -3  13  -3    0.37    0.07
   3  13   3    0.38    0.13
   3  13   3    0.28    0.13
   3  13   3    0.73    0.13
  -3  13  -3    0.42    0.05
   3  13   3    0.61    0.15
   4 -13   3    0.38    0.17
   4 -13   3   -0.04    0.08
   4 -13   3    0.17    0.16
   4 -13   3    0.14    0.12
   4 -13   3   -0.09    0.13
  -4  13  -3   -0.08    0.07
   4  13   3    0.04    0.12
  -4  13  -3    0.04    0.07
   4  13   3    0.35    0.10
   5 -13   3    0.25    0.17
   5 -13   3    0.54    0.16
  -5 -13  -3    0.22    0.07
   5 -13   3    0.29    0.19
   5 -13   3    0.26    0.11
  -5 -13  -3    0.29    0.08
   5 -13   3    0.24    0.13
   5  13   3    0.34    0.07
  -5  13  -3    0.26    0.10
  -5  13  -3    0.39    0.11
   5  13   3    0.03    0.09
   5  13   3    0.30    0.08
   6 -13   3    1.46    0.29
   6 -13   3    0.98    0.22
   6 -13   3    1.01    0.20
   6 -13   3    0.89    0.18
  -6 -13  -3    1.04    0.17
   6  13   3    1.01    0.16
  -6  13  -3    0.90    0.14
   6  13   3    1.06    0.26
   6  13   3    0.85    0.13
  -6  13  -3    1.13    0.15
   7 -13   3    0.06    0.16
   7 -13   3   -0.05    0.16
   7 -13   3    0.26    0.23
  -7  13  -3    0.16    0.18
   7  13   3    0.15    0.14
   8 -13   3   -0.07    0.25
   8 -13   3    0.14    0.20
   8  13   3   -0.01    0.22
  -8  13  -3    0.29    0.19
   8 -14  -3   -0.16    0.28
   8 -14  -3   -0.10    0.22
  -8 -14   3   -0.06    0.30
  -8  14   3    0.21    0.19
   8  14  -3    0.19    0.17
   7 -14  -3   -0.33    0.24
   7 -14  -3   -0.02    0.19
  -7  14   3    0.08    0.15
   7  14  -3    0.22    0.16
  -6 -14   3   -0.02    0.08
   6 -14  -3    0.30    0.20
   6 -14  -3   -0.01    0.16
   6 -14  -3    0.29    0.18
   6 -14  -3   -0.10    0.23
  -6  14   3   -0.01    0.24
  -6  14   3   -0.17    0.11
   5 -14  -3   -0.09    0.15
   5 -14  -3   -0.10    0.12
   5 -14  -3    0.01    0.15
   5 -14  -3    0.12    0.20
  -5  14   3    0.16    0.10
  -5  14   3   -0.46    0.24
  -5  14   3   -0.02    0.10
   4 -14  -3    0.27    0.10
   4 -14  -3    0.16    0.13
   4 -14  -3    0.10    0.14
   4 -14  -3    0.44    0.18
  -4  14   3    0.27    0.24
   4  14  -3    0.31    0.23
  -4  14   3    0.28    0.06
   4  14  -3    0.30    0.17
  -4  14   3    0.44    0.08
   3 -14  -3   -0.03    0.13
   3 -14  -3    0.14    0.16
   3  14  -3    0.02    0.18
   3  14  -3    0.19    0.16
  -3  14   3   -0.01    0.20
   2 -14  -3    0.69    0.17
   2 -14  -3    0.78    0.18
   2  14  -3    0.64    0.20
   2  14  -3    1.08    0.19
  -2  14   3    0.59    0.22
  -2  14   3    0.94    0.20
   1 -14  -3   -0.08    0.13
   1  14  -3   -0.27    0.16
   1  14  -3    0.02    0.18
  -1  14   3   -0.16    0.16
  -1  14   3    0.10    0.18
  -1  14   3   -0.03    0.13
   0 -14  -3    0.25    0.14
   0  14   3   -0.02    0.14
   0  14   3    0.35    0.19
   0  14   3    0.11    0.15
   0  14   3    0.07    0.22
   0  14  -3   -0.06    0.19
   0  14  -3    0.34    0.17
   0  14  -3    0.21    0.18
   1 -14   3    0.27    0.13
   1  14   3    0.32    0.16
  -1  14  -3   -0.17    0.17
   1  14   3   -0.27    0.19
   1  14   3    0.18    0.17
  -1  14  -3    0.12    0.18
   1  14   3    0.27    0.16
   2 -14   3    0.35    0.17
   2 -14   3    0.60    0.17
   2  14   3    0.56    0.15
  -2  14  -3    0.18    0.19
   2  14   3    0.10    0.22
  -2  14  -3    0.81    0.22
   3 -14   3   -0.08    0.16
   3 -14   3   -0.05    0.14
   3  14   3   -0.13    0.13
  -3  14  -3    0.32    0.22
   3  14   3    0.12    0.23
   3  14   3    0.04    0.14
   4 -14   3    0.01    0.09
   4 -14   3    0.13    0.18
   4 -14   3    0.05    0.15
   4 -14   3    0.12    0.09
  -4  14  -3   -0.08    0.05
   4  14   3    0.21    0.13
   4  14   3   -0.07    0.14
  -4  14  -3    0.00    0.06
   5 -14   3    0.06    0.12
   5 -14   3    0.35    0.17
   5 -14   3    0.58    0.22
  -5 -14  -3    0.01    0.05
   5 -14   3    0.27    0.19
  -5  14  -3    0.05    0.10
  -5  14  -3    0.10    0.11
  -6 -14  -3    0.13    0.08
   6 -14   3   -0.31    0.20
   6 -14   3    0.06    0.19
  -6  14  -3   -0.09    0.12
   6  14   3    0.01    0.17
   6  14   3   -0.04    0.09
   7 -14   3    0.15    0.25
   7 -14   3    0.10    0.22
   7  14   3    0.30    0.15
  -7  14  -3   -0.24    0.15
   8 -14   3   -0.13    0.22
   8 -14   3   -0.02    0.28
  -8  14  -3   -0.38    0.17
   8  14   3   -0.08    0.20
   7 -15  -3    0.12    0.54
   7 -15  -3   -0.10    0.22
  -7  15   3   -0.03    0.15
  -7  15   3    0.36    0.14
   6 -15  -3    0.64    0.28
   6 -15  -3    0.61    0.20
  -6  15   3    0.29    0.13
  -6  15   3    0.16    0.16
   5 -15  -3    0.07    0.23
   5 -15  -3   -0.01    0.12
   5 -15  -3    0.28    0.20
   5  15  -3    0.08    0.26
  -5  15   3   -0.43    0.26
   4 -15  -3    0.24    0.09
   4 -15  -3    0.03    0.08
   4 -15  -3   -0.42    0.20
   4 -15  -3    0.22    0.17
  -4  15   3    0.39    0.26
   4  15  -3   -0.10    0.21
   3 -15  -3    0.24    0.16
   3 -15  -3    0.30    0.20
  -3  15   3    0.10    0.23
   2 -15  -3    0.09    0.18
   2  15  -3    0.10    0.34
  -2  15   3    0.00    0.23
   2  15  -3    0.03    0.21
  -2  15   3   -0.09    0.26
   1 -15  -3    0.11    0.17
  -1  15   3    0.05    0.25
  -1  15   3   -0.27    0.19
   1  15  -3    0.20    0.20
   0 -15  -3   -0.04    0.16
   0  15  -3    0.26    0.23
   0  15   3   -0.32    0.21
   0  15   3    0.16    0.18
   1 -15   3    0.24    0.15
  -1  15  -3    0.18    0.24
   1  15   3    0.27    0.22
   1  15   3   -0.19    0.17
   2 -15   3    0.19    0.15
   2 -15   3   -0.12    0.16
   2  15   3    0.28    0.17
  -2  15  -3    0.04    0.28
   3 -15   3   -0.12    0.18
   3 -15   3    0.06    0.18
  -3  15  -3   -0.14    0.24
   3  15   3   -0.11    0.16
   4 -15   3   -0.06    0.21
   4 -15   3   -0.05    0.08
   4 -15   3    0.02    0.17
   4  15   3   -0.11    0.21
  -4  15  -3    0.09    0.28
   4  15   3   -0.04    0.17
   5 -15   3    0.50    0.13
   5 -15   3    0.71    0.23
   5 -15   3    0.48    0.24
  -5  15  -3    0.66    0.11
   6 -15   3    0.45    0.26
   6 -15   3   -0.21    0.20
  -6  15  -3    0.16    0.14
   7 -15   3   -0.38    0.26
   7 -15   3    0.58    0.28
  -7  15  -3   -0.14    0.16
   6 -16  -3    0.14    0.31
   6 -16  -3    0.36    0.24
   6  16  -3    0.00    0.33
  -6  16   3    0.11    0.32
  -6  16   3    0.35    0.13
   5 -16  -3    0.68    0.26
   5 -16  -3    0.36    0.22
   5  16  -3    0.67    0.30
   4 -16  -3   -0.02    0.23
   4 -16  -3   -0.02    0.20
  -4  16   3    0.12    0.21
   3 -16  -3   -0.13    0.21
  -3  16   3   -0.60    0.25
   2 -16  -3   -0.07    0.21
   2  16  -3    0.18    0.22
  -2  16   3    0.14    0.26
   1 -16  -3   -0.14    0.19
  -1  16   3    0.17    0.27
   1  16  -3   -0.03    0.22
   0  16  -3    0.20    0.23
   0  16   3    0.27    0.24
   0  16   3    0.33    0.23
   1 -16   3    0.48    0.18
   1  16   3    0.71    0.25
  -1  16  -3   -0.03    0.22
   2 -16   3    0.03    0.20
   2  16   3    0.20    0.19
  -2  16  -3   -0.07    0.28
   3 -16   3    0.23    0.21
   3 -16   3    0.36    0.17
  -3  16  -3    0.01    0.26
   3  16   3   -0.10    0.20
   4 -16   3    0.01    0.23
   4 -16   3   -0.04    0.21
  -4  16  -3    0.25    0.19
   4  16   3   -0.30    0.31
   5 -16   3    0.26    0.21
   5 -16   3   -0.35    0.24
  -5  16  -3    0.49    0.16
   5  16   3    0.06    0.29
   4 -17  -3    0.12    0.29
  -4  17   3   -0.04    0.24
   3 -17  -3   -0.05    0.23
  -3  17   3    0.32    0.15
   2 -17  -3   -0.24    0.21
  -2  17   3    0.36    0.19
   2  17  -3    0.42    0.28
   1 -17  -3    0.25    0.23
   1  17  -3   -0.09    0.26
  -1  17   3    0.34    0.15
   0  17  -3    0.41    0.27
   0  17   3    0.12    0.18
  -1  17  -3    0.56    0.28
   2 -17   3   -0.18    0.19
  -2  17  -3    0.13    0.16
   3 -17   3   -0.03    0.21
   3 -17   3    0.03    0.24
  -3  17  -3    0.62    0.16
   4 -17   3    0.28    0.35
  -4  17  -3    0.07    0.27
  -1  18   3    0.14    0.33
   1  18  -3   -0.10    0.15
   0  18  -3    0.15    0.14
   0  18   3   -0.55    0.28
  13   0  -4    0.56    0.32
  12   0  -4   -0.13    0.25
 -12   0   4    0.53    0.24
  11   0  -4    1.32    0.27
 -11   0   4    1.29    0.25
 -10   0   4    0.82    0.20
 -10   0   4    0.66    0.19
  10   0  -4    0.80    0.19
  10   0  -4    0.48    0.18
  -9   0   4    0.42    0.15
  -9   0   4    0.54    0.19
   9   0  -4    0.29    0.15
   9   0  -4    0.23    0.19
   8   0  -4   -0.08    0.11
  -8   0   4    0.05    0.11
  -8   0   4    0.05    0.09
   8   0  -4   -0.01    0.10
   7   0  -4    6.71    0.27
  -7   0   4    6.66    0.26
   7   0  -4    6.36    0.26
  -7   0   4    6.93    0.26
  -6   0   4    4.44    0.31
  -6   0   4    5.62    0.21
   6   0  -4    5.91    0.22
   6   0  -4    5.77    0.22
   5   0  -4    4.74    0.18
  -5   0   4    4.87    0.19
  -5   0   4    4.97    0.18
   5   0  -4    4.62    0.19
  -4   0   4   15.22    0.39
   4   0  -4   15.06    0.39
   4   0  -4   14.72    0.39
  -4   0   4   14.59    0.39
  -3   0   4   26.28    0.64
   3   0  -4   26.95    0.64
   3   0  -4   26.65    0.64
  -3   0   4   26.99    0.64
   2   0  -4 1000.00   22.06
   2   0  -4  989.25   22.05
  -2   0   4  993.23   22.05
  -2   0   4  986.32   22.06
  -1   0   4    0.00    0.02
  -1   0   4    0.01    0.01
  -1   0   4    0.02    0.01
   1   0  -4    0.00    0.02
   1   0  -4    0.01    0.01
   0   0   4   80.57    1.72
   0   0  -4   80.31    1.75
   0   0  -4   70.75    1.79
   0   0   4   70.90    1.69
   0   0   4   74.72    1.75
   0   0  -4   77.67    1.72
   1   0   4   12.85    0.32
   1   0   4   13.50    0.32
  -1   0  -4   12.92    0.32
  -1   0  -4   13.56    0.32
   2   0   4    5.29    0.15
   2   0   4    5.24    0.15
  -2   0  -4    5.21    0.15
  -2   0  -4    5.29    0.15
  -3   0  -4   21.16    0.52
   3   0   4   21.47    0.52
   3   0   4   21.30    0.52
  -3   0  -4   21.09    0.52
   4   0   4   10.14    0.29
  -4   0  -4    9.89    0.29
  -4   0  -4   10.38    0.29
   4   0   4   10.75    0.29
   5   0   4    2.75    0.14
  -5   0  -4    2.85    0.15
   5   0   4    2.89    0.15
  -5   0  -4    2.55    0.14
  -6   0  -4    4.85    0.21
   6   0   4    4.86    0.21
  -6   0  -4    4.84    0.20
   6   0   4    4.30    0.23
  -7   0  -4   -0.04    0.08
  -7   0  -4    0.15    0.09
   7   0   4    0.08    0.14
   7   0   4   -0.05    0.08
   8   0   4    0.85    0.15
   8   0   4    0.82    0.14
  -8   0  -4    1.05    0.14
  -8   0  -4    1.09    0.14
  -9   0  -4    0.77    0.19
   9   0   4    0.88    0.16
  -9   0  -4    0.64    0.16
 -10   0  -4   -0.19    0.15
  10   0   4   -0.27    0.19
  10   0   4    0.28    0.19
 -10   0  -4    0.32    0.21
 -11   0  -4    0.07    0.24
  11   0   4    0.40    0.22
  12   0   4    0.03    0.16
 -12   0  -4    0.22    0.24
  13  -1  -4   -0.69    0.26
 -13  -1   4   -0.35    0.22
  13   1  -4    0.67    0.39
 -12  -1   4    0.15    0.22
  12  -1  -4    0.03    0.26
 -12   1   4    0.41    0.24
  12   1  -4    0.41    0.23
 -11  -1   4    0.86    0.21
  11  -1  -4    0.45    0.28
  11   1  -4    0.32    0.22
 -11   1   4    0.59    0.20
  10  -1  -4    0.53    0.18
 -10  -1   4    0.42    0.27
  10  -1  -4    0.13    0.19
  10   1  -4    0.27    0.17
  10   1  -4    0.46    0.17
 -10   1   4    0.58    0.19
 -10   1   4    0.21    0.17
  -9  -1   4    4.17    0.26
  -9  -1   4    4.09    0.27
   9  -1  -4    4.52    0.35
   9  -1  -4    4.61    0.26
  -9   1   4    4.06    0.26
  -9   1   4    4.12    0.28
   9   1  -4    4.58    0.28
   9   1  -4    4.42    0.34
  -8  -1   4    2.55    0.18
   8  -1  -4    2.24    0.19
  -8  -1   4    1.84    0.19
   8  -1  -4    2.42    0.20
   8   1  -4    2.05    0.21
  -8   1   4    2.18    0.20
  -8   1   4    2.18    0.19
   8   1  -4    2.16    0.20
  -7  -1   4    0.17    0.08
   7  -1  -4    0.11    0.10
  -7  -1   4    0.27    0.11
   7  -1  -4    0.11    0.09
   7   1  -4    0.05    0.09
  -7   1   4    0.17    0.10
  -7   1   4    0.11    0.09
   7   1  -4    0.13    0.08
  -6  -1   4   -0.04    0.07
   6  -1  -4   -0.05    0.08
  -6  -1   4   -0.06    0.06
   6  -1  -4   -0.03    0.08
  -6   1   4    0.01    0.06
   6   1  -4    0.01    0.07
  -6   1   4    0.05    0.07
   6   1  -4    0.02    0.08
  -5  -1   4    3.00    0.14
   5  -1  -4    2.98    0.15
  -5  -1   4    2.86    0.14
   5  -1  -4    2.86    0.14
   5   1  -4    2.90    0.14
  -5   1   4    2.78    0.14
  -5   1   4    2.84    0.14
   5   1  -4    2.89    0.14
   4  -1  -4   13.48    0.36
  -4  -1   4   13.10    0.36
  -4  -1   4   13.36    0.36
   4  -1  -4   13.22    0.36
  -4   1   4   13.30    0.36
   4   1  -4   13.43    0.36
   4   1  -4   13.56    0.36
  -4   1   4   13.28    0.36
  -3  -1   4   44.37    1.03
   3  -1  -4   45.33    1.03
  -3  -1   4   44.03    1.02
   3  -1  -4   43.53    1.02
   3   1  -4   44.77    1.02
  -3   1   4   44.55    1.03
  -3   1   4   44.62    1.03
   3   1  -4   43.84    1.02
   2  -1  -4  149.50    3.26
  -2  -1   4  130.85    3.14
  -2  -1   4  129.81    3.14
   2  -1  -4  146.37    3.24
   2   1  -4  142.41    3.21
  -2   1   4  147.83    3.26
   2   1  -4  138.00    3.19
  -2   1   4  147.33    3.24
   1  -1  -4    0.68    0.04
  -1  -1   4    0.68    0.04
   1  -1  -4    0.75    0.04
  -1  -1   4    0.71    0.04
  -1  -1   4    0.74    0.04
  -1  -1   4    0.71    0.04
  -1   1   4    0.71    0.04
  -1   1   4    0.69    0.04
   1   1  -4    0.74    0.04
   1   1  -4    0.76    0.04
   1   1  -4    0.71    0.02
  -1   1   4    0.72    0.03
   0  -1   4  122.40    2.74
   0  -1   4  121.23    2.76
   0  -1   4  122.58    2.74
   0  -1   4  133.02    2.78
   0  -1  -4  121.18    2.74
   0  -1  -4  118.08    2.73
   0   1  -4  127.29    2.75
   0   1   4  111.72    2.82
   0   1   4  123.40    2.73
   0   1  -4  107.80    2.78
   0   1  -4  124.59    2.76
   1  -1   4   14.98    0.35
  -1  -1  -4   14.94    0.35
  -1  -1  -4   13.81    0.36
  -1  -1  -4   14.46    0.33
  -1   1  -4   15.33    0.35
   1   1   4   15.18    0.35
  -1   1  -4   14.89    0.35
  -1   1  -4   14.74    0.34
   2  -1   4    1.33    0.07
   2  -1   4    1.41    0.05
   2  -1   4    1.39    0.07
  -2  -1  -4    1.35    0.07
  -2  -1  -4    1.40    0.06
  -2   1  -4    1.40    0.07
   2   1   4    1.33    0.07
  -2   1  -4    1.44    0.07
   2   1   4    1.35    0.06
  -3  -1  -4    0.13    0.04
   3  -1   4    0.11    0.04
  -3  -1  -4    0.13    0.04
   3  -1   4    0.15    0.04
  -3   1  -4    0.05    0.04
   3   1   4    0.10    0.04
  -3   1  -4    0.15    0.04
   3   1   4    0.11    0.04
   4  -1   4    0.02    0.05
  -4  -1  -4    0.05    0.04
  -4  -1  -4    0.08    0.05
   4  -1   4    0.05    0.05
   4   1   4    0.07    0.05
   4   1   4    0.05    0.04
  -4   1  -4   -0.01    0.04
  -4   1  -4    0.03    0.05
  -5  -1  -4    9.58    0.29
   5  -1   4    9.85    0.30
  -5  -1  -4    9.24    0.29
   5  -1   4    9.29    0.29
   5   1   4    9.54    0.29
   5   1   4    9.46    0.28
  -5   1  -4    9.24    0.29
  -5   1  -4    9.60    0.29
  -6  -1  -4    0.61    0.10
   6  -1   4    0.53    0.09
  -6  -1  -4    0.60    0.09
   6  -1   4    0.49    0.10
   6   1   4    0.53    0.09
  -6   1  -4    0.55    0.09
   6   1   4    0.46    0.09
  -7  -1  -4    0.09    0.09
   7  -1   4    0.18    0.10
   7  -1   4    0.16    0.10
  -7  -1  -4    0.02    0.09
  -7   1  -4    0.16    0.10
  -7   1  -4    0.16    0.10
   7   1   4    0.13    0.09
   7   1   4    0.19    0.10
   8  -1   4    0.12    0.13
   8  -1   4    0.29    0.13
  -8  -1  -4    0.15    0.12
  -8  -1  -4    0.31    0.12
   8   1   4    0.20    0.16
  -8   1  -4    0.24    0.13
   8   1   4    0.25    0.12
  -8   1  -4    0.29    0.13
  -9  -1  -4    0.08    0.16
   9  -1   4    0.11    0.13
   9  -1   4    0.02    0.17
  -9  -1  -4   -0.11    0.14
   9   1   4   -0.09    0.16
  -9   1  -4    0.19    0.16
   9   1   4    0.00    0.14
  -9   1  -4    0.16    0.15
 -10  -1  -4    0.45    0.21
  10  -1   4    0.59    0.20
 -10  -1  -4    0.37    0.19
  10  -1   4    0.49    0.22
 -10   1  -4   -0.05    0.20
 -10   1  -4    0.16    0.18
  10   1   4    0.46    0.19
  10   1   4    0.52    0.20
  11  -1   4    0.46    0.24
 -11  -1  -4    0.00    0.19
  11   1   4    0.06    0.20
 -11   1  -4    0.14    0.22
 -12  -1  -4    0.26    0.25
  12  -1   4   -0.53    0.23
 -12   1  -4   -0.03    0.25
  12   1   4   -0.39    0.16
 -12  -2   4   -0.17    0.26
  12  -2  -4   -0.37    0.25
  12   2  -4   -0.25    0.13
 -12   2   4    0.00    0.21
 -11  -2   4    0.11    0.20
  11  -2  -4   -0.06    0.22
 -11   2   4   -0.11    0.17
  11   2  -4   -0.08    0.18
  11   2  -4   -0.04    0.23
  10  -2  -4    1.72    0.23
 -10  -2   4    1.59    0.24
  10  -2  -4    1.97    0.26
 -10  -2   4    1.25    0.22
  10   2  -4    1.56    0.21
 -10   2   4    1.16    0.19
  10   2  -4    1.73    0.21
 -10   2   4    1.60    0.21
   9  -2  -4    0.14    0.19
  -9  -2   4    0.16    0.13
  -9  -2   4    0.29    0.14
   9  -2  -4    0.22    0.14
   9   2  -4   -0.02    0.13
  -9   2   4    0.07    0.15
   9   2  -4    0.12    0.16
  -9   2   4    0.34    0.15
  -8  -2   4    5.82    0.27
  -8  -2   4    5.14    0.26
   8  -2  -4    5.67    0.26
   8  -2  -4    5.79    0.29
  -8   2   4    5.78    0.28
   8   2  -4    5.38    0.26
  -8   2   4    6.02    0.27
   8   2  -4    5.99    0.30
   7  -2  -4    0.47    0.11
  -7  -2   4    0.34    0.10
   7  -2  -4    0.52    0.11
  -7  -2   4    0.42    0.10
   7   2  -4    0.43    0.12
  -7   2   4    0.39    0.10
   7   2  -4    0.47    0.11
  -7   2   4    0.43    0.11
  -6  -2   4    0.37    0.08
   6  -2  -4    0.14    0.08
  -6  -2   4    0.39    0.09
   6  -2  -4    0.40    0.09
   6   2  -4    0.43    0.09
  -6   2   4    0.28    0.09
   6   2  -4    0.39    0.08
  -6   2   4    0.35    0.08
  -5  -2   4   12.68    0.36
   5  -2  -4   12.76    0.36
  -5  -2   4   12.65    0.36
   5  -2  -4   12.37    0.35
  -5   2   4   12.21    0.36
   5   2  -4   12.20    0.35
   5   2  -4   12.72    0.36
  -5   2   4   12.72    0.36
  -4  -2   4    3.19    0.14
   4  -2  -4    3.19    0.14
   4  -2  -4    3.00    0.13
  -4  -2   4    3.16    0.13
  -4   2   4    3.29    0.14
   4   2  -4    3.15    0.13
   4   2  -4    3.08    0.13
  -4   2   4    2.77    0.13
   3  -2  -4   18.62    0.47
  -3  -2   4   19.18    0.47
  -3  -2   4   19.07    0.47
   3  -2  -4   18.89    0.47
   3   2  -4   19.20    0.47
  -3   2   4   19.19    0.47
   3   2  -4   18.89    0.47
  -3   2   4   19.54    0.47
   2  -2  -4   11.87    0.29
  -2  -2   4   11.54    0.29
  -2  -2   4   11.56    0.27
  -2  -2   4   10.36    0.30
  -2  -2   4   11.48    0.28
   2  -2  -4   11.39    0.29
   2   2  -4   11.57    0.29
   2   2  -4   11.36    0.30
   2   2  -4   11.73    0.29
  -2   2   4   11.96    0.29
  -2   2   4   11.81    0.29
  -1  -2   4    2.76    0.10
  -1  -2   4    2.74    0.09
  -1  -2   4    2.82    0.09
   1  -2  -4    2.81    0.09
  -1  -2   4    2.85    0.09
   1  -2  -4    2.74    0.09
   1  -2  -4    2.70    0.08
   1   2  -4    2.94    0.09
  -1   2   4    2.83    0.09
   1   2  -4    2.81    0.08
  -1   2   4    2.76    0.09
   1   2  -4    2.77    0.09
   1   2  -4    2.81    0.09
  -1   2   4    3.02    0.09
  -1   2   4    2.77    0.08
   1   2  -4    2.86    0.10
   0  -2  -4    4.52    0.12
   0  -2  -4    4.24    0.12
   0  -2   4    4.32    0.12
   0  -2   4    4.31    0.11
   0  -2   4    4.23    0.12
   0  -2   4    4.24    0.13
   0  -2   4    4.39    0.13
   0  -2  -4    4.45    0.12
   0   2   4    4.34    0.12
   0   2  -4    4.24    0.12
   0   2  -4    4.39    0.12
   0   2   4    4.34    0.12
   0   2  -4    4.33    0.12
   1  -2   4   34.82    0.78
   1  -2   4   33.32    0.77
  -1  -2  -4   34.99    0.78
   1  -2   4   34.14    0.78
  -1  -2  -4   34.31    0.78
  -1  -2  -4   33.79    0.77
  -1   2  -4   34.00    0.78
   1   2   4   34.42    0.78
  -1   2  -4   35.06    0.78
   1   2   4   33.45    0.78
  -1   2  -4   34.09    0.77
   1   2   4   34.20    0.77
  -2  -2  -4    1.27    0.06
  -2  -2  -4    1.27    0.07
   2  -2   4    1.26    0.06
   2  -2   4    1.34    0.07
   2  -2   4    1.31    0.06
   2   2   4    1.31    0.05
  -2   2  -4    1.18    0.06
   2   2   4    1.29    0.06
   2   2   4    1.33    0.07
  -2   2  -4    1.30    0.07
  -3  -2  -4   17.02    0.42
   3  -2   4   17.11    0.43
   3  -2   4   16.95    0.43
  -3  -2  -4   17.06    0.42
   3  -2   4   17.01    0.41
   3   2   4   16.61    0.43
  -3   2  -4   17.64    0.43
  -3   2  -4   16.91    0.42
   3   2   4   16.92    0.42
  -4  -2  -4    9.44    0.27
  -4  -2  -4    9.14    0.26
   4  -2   4    9.24    0.27
   4  -2   4    9.13    0.27
  -4   2  -4    9.27    0.27
   4   2   4    9.38    0.27
   4   2   4    9.09    0.27
  -4   2  -4    9.27    0.27
   5  -2   4    8.59    0.27
  -5  -2  -4    8.41    0.27
  -5  -2  -4    8.37    0.27
   5  -2   4    8.74    0.28
   5   2   4    8.74    0.27
   5   2   4    8.22    0.27
  -5   2  -4    8.43    0.27
  -5   2  -4    8.38    0.27
   6  -2   4    0.71    0.11
  -6  -2  -4    0.85    0.11
   6  -2   4    0.79    0.11
  -6  -2  -4    0.72    0.10
  -6   2  -4    0.79    0.11
   6   2   4    0.86    0.11
   6   2   4    0.76    0.11
  -6   2  -4    0.63    0.10
   7  -2   4    0.84    0.13
   7  -2   4    0.96    0.12
  -7  -2  -4    0.92    0.13
  -7  -2  -4    0.83    0.12
   7   2   4    0.76    0.12
   7   2   4    0.92    0.13
  -7   2  -4    0.98    0.13
  -7   2  -4    0.82    0.12
   8  -2   4    0.55    0.14
  -8  -2  -4    0.77    0.14
  -8  -2  -4    0.54    0.14
   8  -2   4    0.74    0.14
  -8   2  -4    0.73    0.14
   8   2   4    0.85    0.20
   8   2   4    0.76    0.14
  -8   2  -4    0.57    0.15
  -9  -2  -4    0.37    0.14
   9  -2   4    0.65    0.16
  -9  -2  -4    0.59    0.19
   9  -2   4    0.36    0.19
   9   2   4    0.35    0.15
  -9   2  -4    0.60    0.18
   9   2   4    0.21    0.17
  -9   2  -4    0.47    0.17
  10  -2   4    0.22    0.21
 -10  -2  -4    0.02    0.16
  10  -2   4    0.23    0.19
  10   2   4    0.31    0.20
 -10   2  -4    0.17    0.18
 -10   2  -4   -0.01    0.17
  10   2   4    0.37    0.26
  11  -2   4    0.39    0.24
 -11  -2  -4    0.16    0.21
 -11   2  -4    0.27    0.21
  11   2   4    0.21    0.29
  11   2   4    0.24    0.26
 -12  -2  -4   -0.25    0.25
  12  -2   4    0.11    0.30
 -12   2  -4   -0.28    0.16
  12  -3  -4   -0.04    0.28
 -12  -3   4    0.04    0.31
 -12   3   4   -0.34    0.15
  12   3  -4   -0.10    0.16
  11  -3  -4   -0.01    0.23
 -11  -3   4    0.03    0.19
  11   3  -4    0.47    0.21
 -11   3   4    0.23    0.18
  11   3  -4    0.32    0.18
  10  -3  -4    0.07    0.23
  10  -3  -4    0.23    0.18
 -10  -3   4    0.18    0.23
 -10   3   4    0.18    0.18
 -10   3   4    0.06    0.19
  10   3  -4    0.34    0.18
  10   3  -4    0.32    0.21
  -9  -3   4    0.84    0.16
   9  -3  -4    0.79    0.25
   9  -3  -4    0.67    0.17
  -9  -3   4    0.77    0.16
  -9   3   4    0.55    0.16
   9   3  -4    0.80    0.18
  -9   3   4    0.68    0.16
   9   3  -4    0.42    0.15
  -8  -3   4    0.12    0.10
   8  -3  -4   -0.27    0.11
  -8  -3   4    0.00    0.10
   8  -3  -4   -0.06    0.11
   8   3  -4   -0.08    0.15
   8   3  -4   -0.10    0.11
  -8   3   4    0.02    0.12
  -8   3   4   -0.18    0.12
  -7  -3   4    0.71    0.12
   7  -3  -4    0.62    0.12
  -7  -3   4    1.04    0.13
   7  -3  -4    0.85    0.12
  -7   3   4    0.88    0.12
   7   3  -4    0.86    0.11
   7   3  -4    0.88    0.13
  -7   3   4    0.93    0.14
   6  -3  -4    2.99    0.17
  -6  -3   4    3.30    0.18
   6  -3  -4    3.13    0.17
  -6  -3   4    3.14    0.17
   6   3  -4    3.05    0.16
  -6   3   4    3.03    0.16
   6   3  -4    2.95    0.16
  -6   3   4    3.34    0.17
   5  -3  -4    0.65    0.09
  -5  -3   4    0.59    0.08
   5  -3  -4    0.54    0.08
  -5  -3   4    0.52    0.07
  -5   3   4    0.58    0.08
   5   3  -4    0.48    0.07
   5   3  -4    0.52    0.08
  -5   3   4    0.61    0.08
  -4  -3   4    0.96    0.08
   4  -3  -4    0.82    0.09
  -4  -3   4    0.91    0.09
   4  -3  -4    0.78    0.10
   4   3  -4    0.74    0.08
  -4   3   4    0.85    0.08
  -4   3   4    0.76    0.08
   4   3  -4    0.77    0.08
   3  -3  -4   12.28    0.32
  -3  -3   4   12.13    0.31
   3  -3  -4   12.50    0.33
  -3  -3   4   11.88    0.30
  -3  -3   4   12.08    0.32
  -3  -3   4   12.47    0.32
  -3   3   4   12.16    0.32
   3   3  -4   12.53    0.32
   3   3  -4   12.17    0.32
  -3   3   4   12.66    0.33
  -2  -3   4    4.39    0.13
  -2  -3   4    4.23    0.13
   2  -3  -4    4.25    0.14
  -2  -3   4    4.29    0.13
   2  -3  -4    4.27    0.14
  -2  -3   4    4.35    0.12
  -2   3   4    4.50    0.14
   2   3  -4    4.27    0.13
   2   3  -4    4.41    0.13
   2   3  -4    4.36    0.13
   2   3  -4    4.35    0.15
  -2   3   4    4.41    0.13
   1  -3  -4    5.39    0.14
  -1  -3   4    4.84    0.16
   1  -3  -4    5.27    0.14
  -1  -3   4    5.45    0.15
  -1  -3   4    5.27    0.14
  -1  -3   4    5.41    0.14
   1   3  -4    5.37    0.14
  -1   3   4    5.24    0.14
   1   3  -4    5.08    0.16
   1   3  -4    5.28    0.15
  -1   3   4    5.09    0.14
  -1   3   4    5.20    0.15
  -1   3   4    5.19    0.15
   1   3  -4    5.03    0.14
   1   3  -4    5.02    0.14
   0  -3   4  107.97    2.61
   0  -3  -4  117.17    2.65
   0  -3  -4  116.24    2.63
   0  -3  -4  119.32    2.67
   0  -3   4  116.81    2.62
   0  -3  -4  119.83    2.66
   0  -3   4  115.91    2.65
   0  -3   4  119.78    2.65
   0   3  -4  105.51    2.59
   0   3  -4  119.07    2.63
   0   3  -4  120.26    2.65
   0   3   4  114.87    2.63
   0   3   4  113.53    2.61
   0   3  -4  115.41    2.62
   0   3  -4  123.04    2.73
   0   3   4  119.43    2.65
  -1  -3  -4   17.86    0.42
   1  -3   4   17.65    0.41
   1  -3   4   17.60    0.41
   1  -3   4   17.12    0.41
  -1  -3  -4   17.15    0.41
  -1  -3  -4   17.15    0.41
  -1   3  -4   16.90    0.41
  -1   3  -4   17.85    0.41
   1   3   4   17.06    0.39
  -1   3  -4   17.61    0.42
   1   3   4   17.63    0.41
   1   3   4   17.50    0.41
   1   3   4   17.41    0.41
  -2  -3  -4    9.61    0.25
  -2  -3  -4    9.62    0.23
   2  -3   4    9.31    0.25
   2  -3   4    9.12    0.27
   2  -3   4    9.84    0.25
  -2   3  -4    9.51    0.25
   2   3   4    9.60    0.25
   2   3   4    9.65    0.24
   2   3   4    9.52    0.25
  -2   3  -4    9.76    0.25
  -2   3  -4    9.92    0.25
  -3  -3  -4    0.34    0.05
  -3  -3  -4    0.39    0.05
   3  -3   4    0.34    0.05
   3  -3   4    0.32    0.04
   3  -3   4    0.32    0.05
   3   3   4    0.27    0.05
  -3   3  -4    0.28    0.05
   3   3   4    0.40    0.05
  -3   3  -4    0.39    0.05
   4  -3   4    6.49    0.21
   4  -3   4    6.41    0.19
   4  -3   4    7.00    0.22
  -4  -3  -4    6.64    0.21
  -4  -3  -4    6.62    0.21
   4   3   4    6.55    0.21
  -4   3  -4    6.32    0.21
  -4   3  -4    6.33    0.21
   4   3   4    6.64    0.21
   5  -3   4    1.93    0.14
   5  -3   4    2.19    0.14
  -5  -3  -4    2.19    0.13
  -5   3  -4    2.28    0.14
   5   3   4    2.15    0.13
   5   3   4    2.43    0.14
  -5   3  -4    2.07    0.13
   6  -3   4    0.16    0.08
  -6  -3  -4    0.30    0.09
  -6  -3  -4    0.07    0.08
   6  -3   4    0.18    0.09
  -6   3  -4    0.00    0.09
  -6   3  -4    0.17    0.08
   6   3   4    0.07    0.07
   6   3   4    0.16    0.08
  -7  -3  -4    0.03    0.09
   7  -3   4    0.05    0.10
   7  -3   4   -0.12    0.10
  -7  -3  -4    0.18    0.09
   7   3   4    0.09    0.09
  -7   3  -4   -0.01    0.10
  -7   3  -4    0.02    0.08
  -8  -3  -4    0.06    0.12
   8  -3   4   -0.01    0.12
  -8  -3  -4    0.08    0.11
   8  -3   4   -0.11    0.11
   8   3   4   -0.13    0.15
   8   3   4   -0.11    0.12
  -8   3  -4   -0.03    0.12
  -8   3  -4   -0.13    0.14
   9  -3   4    0.15    0.20
  -9  -3  -4    0.13    0.14
   9  -3   4    0.37    0.17
  -9  -3  -4   -0.12    0.15
  -9   3  -4    0.11    0.16
   9   3   4    0.07    0.17
  -9   3  -4    0.40    0.15
   9   3   4   -0.06    0.14
  10  -3   4    0.52    0.21
 -10  -3  -4    0.27    0.20
  10   3   4    0.63    0.20
 -10   3  -4    0.24    0.17
 -10   3  -4    0.52    0.21
  10   3   4    0.54    0.19
 -11  -3  -4    0.85    0.23
  11  -3   4    0.21    0.30
  11   3   4    0.20    0.24
 -11   3  -4    0.58    0.23
  12  -3   4   -0.67    0.32
 -12  -3  -4   -0.04    0.24
 -12  -4   4    0.52    0.27
  12  -4  -4    0.19    0.32
  12   4  -4   -0.33    0.15
 -11  -4   4   -0.01    0.24
  11  -4  -4    0.32    0.27
  11   4  -4   -0.04    0.20
 -11   4   4    0.19    0.20
  11   4  -4   -0.64    0.23
  10  -4  -4    0.75    0.22
 -10  -4   4    1.25    0.24
  10   4  -4    0.77    0.21
  10   4  -4    0.71    0.20
 -10   4   4    0.84    0.18
 -10   4   4    0.78    0.20
  -9  -4   4    0.05    0.13
   9  -4  -4    0.13    0.15
  -9  -4   4    0.03    0.13
   9  -4  -4   -0.03    0.19
   9   4  -4    0.14    0.15
  -9   4   4   -0.08    0.15
   9   4  -4    0.23    0.16
  -9   4   4    0.03    0.15
   8  -4  -4    1.77    0.19
  -8  -4   4    1.51    0.17
   8  -4  -4    1.60    0.19
  -8  -4   4    1.45    0.17
   8   4  -4    1.26    0.18
  -8   4   4    1.85    0.19
  -8   4   4    1.71    0.20
   8   4  -4    1.60    0.20
   7  -4  -4   -0.04    0.10
   7  -4  -4    0.01    0.10
  -7  -4   4   -0.02    0.09
  -7  -4   4    0.00    0.10
  -7   4   4    0.10    0.10
   7   4  -4    0.11    0.09
   7   4  -4   -0.10    0.09
  -7   4   4    0.05    0.08
  -6  -4   4    0.12    0.07
  -6  -4   4    0.08    0.08
   6  -4  -4    0.04    0.08
   6  -4  -4    0.19    0.08
  -6  -4   4   -0.07    0.06
  -6   4   4    0.06    0.07
  -6   4   4   -0.01    0.08
   6   4  -4    0.07    0.07
   6   4  -4    0.07    0.07
  -5  -4   4    0.27    0.07
  -5  -4   4    0.22    0.06
   5  -4  -4    0.21    0.07
  -5  -4   4    0.31    0.09
  -5   4   4    0.14    0.05
  -5   4   4    0.29    0.08
   5   4  -4    0.30    0.07
   5   4  -4    0.22    0.07
  -4  -4   4    2.90    0.11
  -4  -4   4    2.90    0.13
   4  -4  -4    2.80    0.13
  -4  -4   4    2.90    0.13
   4  -4  -4    2.95    0.14
  -4  -4   4    2.89    0.12
  -4   4   4    3.12    0.14
  -4   4   4    2.99    0.13
   4   4  -4    3.07    0.13
   4   4  -4    2.98    0.13
   3  -4  -4    5.55    0.17
  -3  -4   4    5.64    0.17
   3  -4  -4    5.62    0.18
  -3  -4   4    5.58    0.17
   3  -4  -4    5.78    0.18
  -3  -4   4    5.58    0.17
   3   4  -4    5.51    0.17
  -3   4   4    5.58    0.18
  -3   4   4    5.65    0.18
   3   4  -4    5.76    0.17
   3   4  -4    5.79    0.19
   2  -4  -4    6.36    0.18
  -2  -4   4    6.47    0.19
  -2  -4   4    6.58    0.18
   2  -4  -4    6.58    0.19
  -2  -4   4    6.59    0.18
  -2  -4   4    6.61    0.18
   2  -4  -4    6.82    0.19
   2   4  -4    6.23    0.20
   2   4  -4    6.61    0.18
   2   4  -4    6.46    0.18
  -2   4   4    6.44    0.18
   2   4  -4    6.41    0.18
  -2   4   4    6.42    0.18
   2   4  -4    6.45    0.18
   1  -4  -4    2.13    0.08
  -1  -4   4    2.20    0.07
  -1  -4   4    2.12    0.10
   1  -4  -4    2.11    0.08
   1  -4  -4    2.15    0.08
  -1  -4   4    2.22    0.10
   1  -4  -4    2.23    0.10
  -1   4   4    2.10    0.10
   1   4  -4    2.09    0.10
   1   4  -4    2.22    0.09
   1   4  -4    2.10    0.07
  -1   4   4    2.13    0.07
  -1   4   4    2.13    0.08
   1   4  -4    2.10    0.07
  -1   4   4    2.19    0.08
   1   4  -4    2.20    0.09
   0  -4  -4   10.71    0.26
   0  -4  -4   10.31    0.27
   0  -4   4   10.64    0.25
   0  -4  -4   10.83    0.28
   0  -4  -4   10.55    0.26
   0  -4   4    9.89    0.29
   0   4   4   10.10    0.28
   0   4  -4   10.59    0.28
   0   4  -4   10.37    0.25
   0   4   4   10.68    0.26
   0   4  -4   10.92    0.27
   0   4   4   10.42    0.27
   0   4   4   10.70    0.25
   0   4  -4   10.60    0.29
   0   4  -4   10.73    0.25
   0   4   4   10.18    0.24
   0   4   4   10.72    0.28
   1  -4   4   24.30    0.60
  -1  -4  -4   23.57    0.56
  -1  -4  -4   23.92    0.57
   1  -4   4   24.56    0.56
  -1  -4  -4   24.58    0.58
  -1  -4  -4   24.29    0.56
   1  -4   4   24.37    0.56
   1  -4   4   24.01    0.57
  -1   4  -4   24.84    0.58
   1   4   4   24.55    0.57
  -1   4  -4   24.06    0.56
   1   4   4   24.18    0.56
  -1   4  -4   24.74    0.56
   1   4   4   23.59    0.55
   1   4   4   24.11    0.56
   2  -4   4    2.55    0.10
  -2  -4  -4    2.75    0.10
   2  -4   4    2.79    0.10
  -2  -4  -4    2.67    0.10
   2  -4   4    2.49    0.12
  -2   4  -4    2.73    0.11
  -2   4  -4    2.79    0.10
   2   4   4    2.75    0.10
  -2   4  -4    2.72    0.10
   2   4   4    2.61    0.10
   2   4   4    2.68    0.10
   3  -4   4    0.59    0.07
   3  -4   4    0.64    0.07
  -3  -4  -4    0.62    0.07
  -3  -4  -4    0.55    0.05
  -3  -4  -4    0.63    0.07
   3  -4   4    0.64    0.07
   3   4   4    0.57    0.07
  -3   4  -4    0.59    0.07
   3   4   4    0.64    0.06
  -3   4  -4    0.63    0.07
   3   4   4    0.68    0.06
  -4  -4  -4    2.02    0.11
  -4  -4  -4    1.88    0.08
   4  -4   4    1.96    0.13
   4  -4   4    1.78    0.11
  -4  -4  -4    1.98    0.11
   4  -4   4    2.04    0.12
   4   4   4    1.83    0.10
   4   4   4    1.85    0.11
  -4   4  -4    2.01    0.11
  -4   4  -4    1.86    0.11
   5  -4   4    0.01    0.05
  -5  -4  -4    0.01    0.06
   5  -4   4    0.06    0.07
   5  -4   4    0.12    0.07
  -5  -4  -4    0.09    0.06
   5   4   4    0.12    0.06
  -5   4  -4    0.09    0.06
   5   4   4    0.10    0.06
  -5   4  -4    0.09    0.07
  -6  -4  -4    0.44    0.10
   6  -4   4    0.40    0.08
   6  -4   4    0.40    0.09
   6  -4   4    0.39    0.11
  -6  -4  -4    0.36    0.09
   6   4   4    0.28    0.09
  -6   4  -4    0.51    0.09
   6   4   4    0.55    0.10
  -6   4  -4    0.45    0.09
   7  -4   4    0.05    0.10
   7  -4   4    0.17    0.11
  -7  -4  -4    0.12    0.10
  -7  -4  -4    0.26    0.10
   7  -4   4    0.12    0.08
  -7   4  -4   -0.04    0.09
   7   4   4    0.19    0.11
  -7   4  -4    0.31    0.10
   7   4   4    0.17    0.11
  -8  -4  -4    0.09    0.11
   8  -4   4    0.12    0.13
  -8  -4  -4   -0.04    0.10
   8  -4   4    0.06    0.13
   8   4   4    0.13    0.15
  -8   4  -4    0.27    0.14
   8   4   4    0.12    0.13
  -8   4  -4    0.22    0.13
   9  -4   4    1.11    0.25
   9  -4   4    0.99    0.19
  -9  -4  -4    0.93    0.18
  -9  -4  -4    0.94    0.19
  -9   4  -4    1.03    0.17
   9   4   4    0.57    0.15
   9   4   4    1.17    0.19
  -9   4  -4    0.98    0.19
  10  -4   4    0.01    0.13
  10  -4   4    0.18    0.22
 -10  -4  -4    0.01    0.19
 -10   4  -4    0.04    0.21
 -10   4  -4    0.02    0.19
  10   4   4    0.08    0.21
  10   4   4   -0.03    0.19
 -11  -4  -4    0.33    0.20
  11  -4   4   -0.22    0.28
  11  -4   4    0.13    0.21
  11   4   4   -0.07    0.22
  11   4   4   -0.43    0.23
 -11   4  -4    0.12    0.23
  12  -4   4   -0.13    0.30
  12  -4   4    0.13    0.21
 -12  -4  -4   -0.37    0.27
 -12  -5   4    0.14    0.29
 -12  -5   4   -0.12    0.22
  12  -5  -4   -0.32    0.31
  12   5  -4    0.26    0.38
 -11  -5   4    0.13    0.25
 -11  -5   4   -0.19    0.17
  11  -5  -4    0.02    0.25
 -11   5   4   -0.45    0.29
  11   5  -4    0.47    0.21
  11   5  -4   -0.12    0.22
 -11   5   4    0.22    0.21
  10  -5  -4    1.15    0.26
 -10  -5   4    0.81    0.17
 -10  -5   4    0.98    0.20
 -10   5   4    1.44    0.23
 -10   5   4    1.02    0.23
  10   5  -4    0.87    0.24
  10   5  -4    1.31    0.23
  -9  -5   4    0.26    0.14
   9  -5  -4    0.15    0.15
   9  -5  -4   -0.14    0.16
  -9  -5   4   -0.14    0.13
   9   5  -4    0.17    0.13
  -9   5   4   -0.06    0.15
  -9   5   4    0.14    0.14
   9   5  -4    0.01    0.14
  -8  -5   4    0.49    0.13
   8  -5  -4    0.46    0.15
  -8  -5   4    0.41    0.13
   8  -5  -4    0.32    0.13
  -8  -5   4    0.39    0.13
  -8   5   4    0.61    0.14
  -8   5   4    0.27    0.13
   8   5  -4    0.54    0.14
   8   5  -4    0.47    0.15
   7  -5  -4   -0.03    0.10
  -7  -5   4   -0.05    0.08
  -7  -5   4    0.04    0.08
   7  -5  -4    0.09    0.10
  -7  -5   4    0.09    0.09
  -7   5   4    0.07    0.08
   7   5  -4    0.10    0.09
   7   5  -4    0.15    0.11
   6  -5  -4    2.45    0.17
  -6  -5   4    2.45    0.16
  -6  -5   4    2.57    0.14
   6  -5  -4    2.48    0.16
  -6  -5   4    2.61    0.16
   6   5  -4    2.49    0.16
  -6   5   4    2.52    0.16
  -6   5   4    2.22    0.16
   6   5  -4    2.35    0.16
  -5  -5   4    1.61    0.12
  -5  -5   4    1.68    0.11
  -5  -5   4    1.60    0.11
   5  -5  -4    1.81    0.13
  -5  -5   4    1.84    0.12
   5  -5  -4    1.60    0.15
  -5   5   4    1.71    0.13
   5   5  -4    1.71    0.12
  -5   5   4    1.77    0.13
   5   5  -4    1.68    0.12
   4  -5  -4    5.23    0.18
  -4  -5   4    5.17    0.17
  -4  -5   4    4.87    0.17
   4  -5  -4    5.09    0.19
  -4  -5   4    4.87    0.17
  -4  -5   4    4.95    0.17
  -4   5   4    4.79    0.18
   4   5  -4    4.88    0.17
  -4   5   4    4.96    0.18
   4   5  -4    4.95    0.17
  -3  -5   4    3.27    0.12
  -3  -5   4    3.27    0.13
   3  -5  -4    3.44    0.14
   3  -5  -4    3.27    0.13
   3  -5  -4    3.31    0.13
  -3  -5   4    3.30    0.12
  -3  -5   4    3.37    0.13
   3   5  -4    3.32    0.12
   3   5  -4    3.40    0.12
  -3   5   4    3.25    0.12
   3   5  -4    3.32    0.13
   3   5  -4    3.36    0.15
  -3   5   4    3.40    0.13
  -2  -5   4    8.07    0.21
   2  -5  -4    7.67    0.23
  -2  -5   4    8.09    0.23
   2  -5  -4    8.03    0.24
   2  -5  -4    8.34    0.22
   2  -5  -4    8.05    0.22
  -2  -5   4    7.85    0.23
  -2  -5   4    8.23    0.21
   2   5  -4    8.07    0.22
  -2   5   4    8.20    0.22
  -2   5   4    8.07    0.22
   2   5  -4    8.19    0.23
   2   5  -4    8.19    0.21
   2   5  -4    8.08    0.21
   2   5  -4    8.32    0.26
  -1  -5   4   25.70    0.65
   1  -5  -4   25.78    0.60
   1  -5  -4   26.39    0.61
   1  -5  -4   25.58    0.61
   1  -5  -4   26.89    0.63
  -1  -5   4   26.17    0.63
  -1  -5   4   26.39    0.60
   1  -5  -4   25.97    0.63
  -1   5   4   26.78    0.63
   1   5  -4   26.14    0.60
   1   5  -4   26.03    0.60
  -1   5   4   26.58    0.64
   1   5  -4   27.73    0.63
  -1   5   4   26.03    0.61
   1   5  -4   26.34    0.63
   1   5  -4   26.61    0.63
  -1   5   4   26.61    0.61
   1   5  -4   26.59    0.65
   0  -5   4   38.34    0.89
   0  -5  -4   38.96    0.90
   0  -5   4   39.61    0.95
   0  -5  -4   40.39    0.94
   0  -5  -4   39.40    0.92
   0   5  -4   41.39    0.93
   0   5  -4   41.09    0.95
   0   5   4   40.52    0.93
   0   5   4   39.42    0.90
   0   5   4   40.45    0.92
   0   5   4   38.83    0.89
   0   5  -4   38.96    0.89
   0   5  -4   39.39    0.93
   0   5   4   40.04    0.93
   0   5  -4   39.45    0.89
  -1  -5  -4    2.97    0.09
   1  -5   4    3.01    0.09
  -1  -5  -4    2.99    0.11
   1  -5   4    2.94    0.13
  -1  -5  -4    2.56    0.09
   1  -5   4    2.99    0.12
   1  -5   4    3.08    0.10
  -1  -5  -4    3.15    0.13
  -1   5  -4    2.97    0.10
  -1   5  -4    3.09    0.09
  -1   5  -4    2.89    0.12
   1   5   4    3.10    0.12
   1   5   4    2.96    0.09
   1   5   4    3.09    0.09
   1   5   4    2.95    0.10
  -2  -5  -4   17.97    0.43
   2  -5   4   17.77    0.45
   2  -5   4   18.48    0.48
  -2  -5  -4   18.01    0.46
   2  -5   4   18.16    0.44
  -2  -5  -4   18.61    0.44
  -2  -5  -4   17.89    0.43
   2  -5   4   18.33    0.44
   2   5   4   17.71    0.42
   2   5   4   17.73    0.44
   2   5   4   18.17    0.44
  -2   5  -4   18.04    0.44
  -2   5  -4   18.31    0.44
   2   5   4   18.06    0.43
  -2   5  -4   18.22    0.46
  -3  -5  -4    0.16    0.04
   3  -5   4    0.10    0.04
   3  -5   4    0.12    0.05
  -3  -5  -4    0.15    0.04
   3  -5   4    0.06    0.05
   3   5   4    0.05    0.04
  -3   5  -4    0.11    0.04
   3   5   4    0.07    0.04
  -3   5  -4    0.10    0.05
   3   5   4    0.06    0.04
   4  -5   4    7.73    0.24
  -4  -5  -4    7.85    0.21
  -4  -5  -4    7.41    0.24
   4  -5   4    7.79    0.24
  -4  -5  -4    7.78    0.23
   4  -5   4    7.85    0.25
  -4   5  -4    7.71    0.24
  -4   5  -4    7.61    0.24
   4   5   4    7.81    0.22
   4   5   4    7.93    0.23
   4   5   4    7.69    0.24
   5  -5   4    1.40    0.11
  -5  -5  -4    1.47    0.09
  -5  -5  -4    1.46    0.12
  -5  -5  -4    1.36    0.12
   5  -5   4    1.49    0.13
   5  -5   4    1.37    0.13
  -5   5  -4    1.35    0.13
   5   5   4    1.52    0.12
   5   5   4    1.32    0.12
  -5   5  -4    1.20    0.12
   6  -5   4    0.36    0.09
  -6  -5  -4    0.22    0.09
  -6  -5  -4    0.32    0.06
   6  -5   4    0.35    0.11
   6  -5   4    0.38    0.08
  -6  -5  -4    0.21    0.08
   6   5   4    0.23    0.09
   6   5   4    0.22    0.08
  -6   5  -4    0.26    0.09
  -6   5  -4    0.38    0.09
  -7  -5  -4    0.38    0.12
  -7  -5  -4    0.36    0.08
   7  -5   4    0.24    0.10
   7  -5   4    0.44    0.11
  -7  -5  -4    0.35    0.11
   7  -5   4    0.37    0.12
  -7   5  -4    0.36    0.12
   7   5   4    0.28    0.13
   7   5   4    0.48    0.11
  -7   5  -4    0.26    0.12
  -8  -5  -4    1.05    0.15
  -8  -5  -4    1.23    0.15
   8  -5   4    1.01    0.18
   8  -5   4    0.87    0.15
   8  -5   4    1.20    0.14
   8   5   4    1.16    0.15
  -8   5  -4    1.27    0.18
  -8   5  -4    0.86    0.17
   9  -5   4    0.87    0.14
   9  -5   4    0.72    0.24
   9  -5   4    0.44    0.22
  -9  -5  -4    0.53    0.20
  -9  -5  -4    0.40    0.15
  -9   5  -4    0.69    0.18
  -9   5  -4    0.39    0.15
   9   5   4    0.49    0.15
   9   5   4    0.58    0.17
  10  -5   4   -0.13    0.24
  10  -5   4    0.37    0.15
 -10  -5  -4    0.19    0.24
 -10   5  -4    0.28    0.19
  10   5   4    0.03    0.20
 -10   5  -4   -0.09    0.18
  10   5   4    0.39    0.20
 -11  -5  -4   -0.04    0.16
 -11  -5  -4   -0.15    0.23
  11  -5   4   -0.29    0.28
  11  -5   4    0.07    0.18
  11   5   4    0.05    0.22
  11   5   4    0.11    0.26
 -11   5  -4   -0.38    0.20
  12  -5   4   -0.02    0.35
 -12  -5  -4   -0.28    0.20
 -12  -5  -4    0.24    0.35
  12  -5   4    0.10    0.24
  12   5   4    0.64    0.30
 -12   5  -4    0.00    0.24
 -12  -6   4    0.41    0.29
 -12  -6   4    0.56    0.16
  12  -6  -4    0.56    0.33
 -12   6   4   -0.48    0.28
  12   6  -4    0.12    0.28
 -11  -6   4   -0.10    0.28
 -11  -6   4    0.21    0.18
  11  -6  -4    0.04    0.29
 -11   6   4    0.40    0.29
 -11   6   4    0.15    0.18
  11   6  -4   -0.45    0.20
  11   6  -4   -0.42    0.24
 -10  -6   4    0.79    0.18
 -10  -6   4    0.64    0.21
  10   6  -4    0.51    0.18
  10   6  -4    0.47    0.21
 -10   6   4    1.11    0.23
 -10   6   4    0.28    0.18
   9  -6  -4    0.17    0.19
  -9  -6   4    0.31    0.14
  -9  -6   4    0.20    0.14
   9  -6  -4    0.16    0.16
  -9   6   4   -0.11    0.15
  -9   6   4    0.32    0.14
   9   6  -4    0.38    0.16
   9   6  -4    0.36    0.17
  -8  -6   4    1.62    0.21
   8  -6  -4    2.23    0.25
   8  -6  -4    1.36    0.17
  -8  -6   4    1.58    0.19
  -8  -6   4    1.96    0.23
   8   6  -4    1.79    0.18
  -8   6   4    1.54    0.18
   8   6  -4    2.22    0.30
  -8   6   4    1.66    0.18
   7  -6  -4    1.62    0.19
  -7  -6   4    1.49    0.17
  -7  -6   4    1.46    0.14
  -7  -6   4    1.61    0.16
   7  -6  -4    1.49    0.18
   7   6  -4    1.49    0.18
  -7   6   4    1.61    0.21
   7   6  -4    1.46    0.16
  -7   6   4    1.62    0.19
  -6  -6   4    1.13    0.13
  -6  -6   4    1.16    0.13
   6  -6  -4    1.05    0.13
   6  -6  -4    1.21    0.14
  -6  -6   4    1.15    0.12
   6   6  -4    0.87    0.11
  -6   6   4    1.00    0.13
   6   6  -4    0.86    0.10
  -6   6   4    1.06    0.12
  -5  -6   4    1.52    0.12
  -5  -6   4    1.61    0.13
   5  -6  -4    1.71    0.14
  -5  -6   4    1.68    0.13
   5  -6  -4    1.54    0.13
  -5  -6   4    1.72    0.12
   5   6  -4    1.59    0.13
  -5   6   4    1.50    0.12
   5   6  -4    1.64    0.12
  -5   6   4    1.56    0.13
  -4  -6   4    1.01    0.10
  -4  -6   4    1.00    0.09
  -4  -6   4    1.11    0.11
   4  -6  -4    1.02    0.10
   4  -6  -4    0.97    0.09
   4  -6  -4    1.07    0.11
  -4   6   4    1.19    0.11
   4   6  -4    1.12    0.09
   4   6  -4    1.20    0.11
   4   6  -4    0.97    0.09
  -4   6   4    0.89    0.09
   3  -6  -4    7.16    0.23
   3  -6  -4    7.14    0.22
   3  -6  -4    7.08    0.24
   3  -6  -4    7.06    0.22
  -3  -6   4    7.03    0.20
  -3  -6   4    7.39    0.23
  -3  -6   4    7.04    0.21
  -3  -6   4    7.28    0.23
   3   6  -4    7.19    0.20
  -3   6   4    7.24    0.21
   3   6  -4    7.18    0.22
   3   6  -4    6.95    0.20
   3   6  -4    6.85    0.25
  -3   6   4    6.98    0.22
   2  -6  -4   17.86    0.47
  -2  -6   4   17.75    0.46
  -2  -6   4   17.70    0.43
   2  -6  -4   17.74    0.46
   2  -6  -4   18.14    0.44
   2  -6  -4   17.85    0.44
   2   6  -4   17.96    0.45
   2   6  -4   17.46    0.42
  -2   6   4   17.95    0.44
   2   6  -4   18.45    0.49
   2   6  -4   18.06    0.45
   2   6  -4   18.45    0.43
  -2   6   4   17.74    0.43
   2   6  -4   18.55    0.46
  -1  -6   4   13.14    0.31
   1  -6  -4   13.10    0.36
  -1  -6   4   12.84    0.31
  -1  -6   4   12.70    0.37
   1  -6  -4   12.91    0.32
   1  -6  -4   13.35    0.35
  -1  -6   4   13.27    0.36
   1   6  -4   12.56    0.35
   1   6  -4   13.12    0.32
   1   6  -4   12.99    0.37
  -1   6   4   13.35    0.36
   1   6  -4   13.60    0.35
   1   6  -4   12.98    0.34
  -1   6   4   13.34    0.32
  -1   6   4   13.44    0.36
   1   6  -4   12.86    0.31
  -1   6   4   12.97    0.32
   1   6  -4   13.36    0.35
   0  -6   4   -0.02    0.02
   0  -6   4    0.02    0.02
   0  -6  -4   -0.01    0.02
   0  -6  -4    0.02    0.04
   0  -6   4   -0.05    0.04
   0  -6  -4    0.04    0.06
   0   6  -4    0.00    0.02
   0   6  -4   -0.03    0.05
   0   6  -4    0.01    0.02
   0   6   4   -0.03    0.02
   0   6   4   -0.04    0.03
   0   6   4   -0.05    0.04
   0   6  -4    0.04    0.04
   0   6   4   -0.01    0.05
   0   6  -4    0.03    0.05
  -1  -6  -4    0.11    0.05
  -1  -6  -4    0.17    0.07
   1  -6   4    0.15    0.05
   1  -6   4    0.17    0.05
   1  -6   4    0.19    0.03
   1  -6   4    0.14    0.05
  -1  -6  -4    0.15    0.03
   1   6   4    0.13    0.03
  -1   6  -4    0.18    0.03
   1   6   4    0.12    0.05
   1   6   4    0.18    0.06
   1   6   4    0.21    0.04
  -1   6  -4    0.15    0.03
  -1   6  -4    0.12    0.05
   1   6   4    0.13    0.05
   1   6   4    0.17    0.03
   2  -6   4    0.02    0.04
  -2  -6  -4    0.06    0.03
   2  -6   4    0.06    0.05
   2  -6   4    0.06    0.04
   2  -6   4    0.11    0.06
  -2  -6  -4    0.06    0.03
  -2  -6  -4    0.03    0.06
  -2   6  -4    0.07    0.04
   2   6   4    0.12    0.05
   2   6   4    0.07    0.03
  -2   6  -4    0.05    0.04
   2   6   4    0.10    0.04
   2   6   4    0.06    0.04
  -2   6  -4    0.17    0.06
   3  -6   4    6.59    0.22
  -3  -6  -4    5.81    0.24
   3  -6   4    6.20    0.23
  -3  -6  -4    6.58    0.20
   3  -6   4    6.67    0.21
   3  -6   4    6.48    0.20
  -3  -6  -4    6.40    0.19
  -3  -6  -4    6.59    0.19
   3   6   4    6.47    0.19
   3   6   4    6.38    0.20
  -3   6  -4    6.29    0.20
  -3   6  -4    6.13    0.20
   3   6   4    6.46    0.19
  -4  -6  -4    3.59    0.17
   4  -6   4    3.81    0.17
  -4  -6  -4    3.97    0.15
   4  -6   4    3.92    0.17
  -4  -6  -4    3.76    0.15
  -4  -6  -4    4.05    0.14
   4   6   4    3.83    0.15
   4   6   4    3.87    0.15
  -4   6  -4    3.87    0.16
  -4   6  -4    3.95    0.16
   4   6   4    4.11    0.16
   5  -6   4    0.08    0.07
  -5  -6  -4   -0.03    0.06
  -5  -6  -4    0.11    0.07
   5  -6   4    0.08    0.08
   5  -6   4    0.13    0.07
  -5  -6  -4    0.14    0.06
   5   6   4   -0.06    0.06
  -5   6  -4    0.06    0.06
  -5   6  -4    0.01    0.07
   5   6   4    0.13    0.06
   5   6   4   -0.01    0.07
   6  -6   4    0.09    0.10
  -6  -6  -4    0.11    0.07
   6  -6   4    0.16    0.09
  -6  -6  -4    0.04    0.08
  -6  -6  -4    0.14    0.08
   6  -6   4    0.06    0.10
   6   6   4    0.02    0.07
  -6   6  -4    0.10    0.08
   6   6   4    0.11    0.10
  -6   6  -4    0.20    0.08
   6   6   4    0.07    0.09
   7  -6   4    0.30    0.13
  -7  -6  -4    0.17    0.11
   7  -6   4    0.06    0.11
   7  -6   4    0.23    0.10
  -7  -6  -4    0.39    0.11
  -7  -6  -4    0.10    0.08
   7   6   4    0.06    0.15
   7   6   4    0.17    0.11
  -7   6  -4    0.30    0.13
   8  -6   4    0.06    0.13
   8  -6   4    0.27    0.16
  -8  -6  -4    0.18    0.13
   8  -6   4    0.08    0.11
  -8  -6  -4    0.15    0.09
  -8  -6  -4    0.28    0.14
   8   6   4    0.28    0.15
  -8   6  -4    0.12    0.13
  -8   6  -4    0.11    0.15
   9  -6   4    0.86    0.22
  -9  -6  -4    0.78    0.16
   9  -6   4    0.95    0.16
  -9  -6  -4    0.79    0.14
   9   6   4    0.80    0.17
  -9   6  -4    0.67    0.16
  -9   6  -4    0.87    0.19
   9   6   4    0.60    0.18
 -10  -6  -4   -0.03    0.16
 -10  -6  -4    0.33    0.24
  10  -6   4    0.06    0.44
 -10   6  -4   -0.08    0.14
 -10   6  -4   -0.37    0.19
  10   6   4    0.00    0.19
  11  -6   4   -0.52    0.30
 -11  -6  -4   -0.11    0.18
  11  -6   4   -0.01    0.20
 -11  -6  -4    0.20    0.25
  11   6   4   -0.35    0.22
 -12  -6  -4    0.21    0.22
  12  -6   4    0.41    0.24
  12  -6   4    0.01    0.34
 -12  -6  -4    1.18    0.35
  12  -7  -4   -0.10    0.35
 -12  -7   4   -0.09    0.29
 -12  -7   4   -0.18    0.17
  12   7  -4    0.10    0.50
 -11  -7   4    0.36    0.21
 -11  -7   4    0.53    0.27
  11  -7  -4    0.45    0.30
  11   7  -4    0.31    0.14
  11   7  -4    0.54    0.28
 -10  -7   4    0.15    0.19
 -10  -7   4    0.07    0.17
  10  -7  -4    0.36    0.28
 -10  -7   4    0.13    0.18
  10   7  -4    0.53    0.19
 -10   7   4   -0.24    0.14
 -10   7   4    0.30    0.23
  10   7  -4    0.15    0.20
  -9  -7   4    0.62    0.16
   9  -7  -4    0.37    0.21
  -9  -7   4    0.54    0.27
  -9  -7   4    0.16    0.15
  -9  -7   4    0.67    0.17
   9   7  -4    0.50    0.17
  -9   7   4    0.42    0.15
  -9   7   4    0.48    0.19
   9   7  -4    0.22    0.16
   8  -7  -4    0.03    0.13
  -8  -7   4   -0.01    0.12
   8  -7  -4    0.15    0.13
  -8  -7   4    0.09    0.14
  -8  -7   4    0.11    0.14
  -8  -7   4   -0.07    0.11
   8   7  -4   -0.05    0.12
   8   7  -4    0.00    0.13
  -8   7   4    0.23    0.13
  -8   7   4    0.22    0.14
  -7  -7   4    2.31    0.19
  -7  -7   4    2.13    0.19
  -7  -7   4    2.17    0.19
  -7  -7   4    2.32    0.19
   7  -7  -4    1.96    0.22
   7  -7  -4    2.11    0.20
  -7   7   4    2.50    0.20
   7   7  -4    2.54    0.19
  -7   7   4    2.34    0.22
   7   7  -4    2.25    0.23
  -6  -7   4    0.35    0.10
  -6  -7   4    0.07    0.09
   6  -7  -4    0.06    0.10
  -6  -7   4    0.24    0.10
  -6  -7   4    0.10    0.08
   6  -7  -4    0.18    0.10
   6  -7  -4    0.15    0.07
   6   7  -4    0.15    0.09
   6   7  -4    0.33    0.09
  -6   7   4    0.10    0.08
  -6   7   4    0.09    0.10
   5  -7  -4    1.50    0.14
   5  -7  -4    1.59    0.13
   5  -7  -4    1.49    0.13
  -5  -7   4    1.48    0.11
  -5  -7   4    1.59    0.13
   5  -7  -4    1.50    0.14
  -5  -7   4    1.39    0.16
  -5  -7   4    1.36    0.14
   5   7  -4    1.58    0.11
   5   7  -4    1.43    0.14
  -5   7   4    1.68    0.13
  -5   7   4    1.30    0.14
   5   7  -4    1.47    0.12
  -4  -7   4   -0.07    0.04
   4  -7  -4    0.04    0.06
  -4  -7   4    0.02    0.05
   4  -7  -4    0.02    0.05
   4  -7  -4   -0.01    0.07
  -4  -7   4    0.08    0.08
  -4  -7   4    0.03    0.08
   4  -7  -4   -0.01    0.06
  -4   7   4    0.07    0.06
   4   7  -4   -0.01    0.05
   4   7  -4    0.06    0.05
   4   7  -4    0.07    0.06
  -4   7   4    0.01    0.05
   3  -7  -4    3.00    0.15
   3  -7  -4    3.31    0.15
  -3  -7   4    3.29    0.16
   3  -7  -4    3.01    0.13
  -3  -7   4    2.84    0.11
  -3  -7   4    3.29    0.16
  -3  -7   4    3.14    0.12
  -3   7   4    3.29    0.14
   3   7  -4    3.09    0.12
  -3   7   4    3.22    0.12
   3   7  -4    2.86    0.17
   3   7  -4    3.13    0.11
   3   7  -4    3.08    0.14
   2  -7  -4    0.77    0.09
  -2  -7   4    0.71    0.05
   2  -7  -4    0.74    0.07
   2  -7  -4    0.83    0.07
  -2  -7   4    0.76    0.06
   2  -7  -4    0.70    0.08
  -2  -7   4    0.80    0.10
   2   7  -4    0.87    0.09
   2   7  -4    0.84    0.10
   2   7  -4    0.80    0.06
[truncated: 1,581,866 more chars]
